# Supplementary material for: Colistin-resistant bacteria poses few risks under physiological conditions
Source: Research Square preprint supplement (doi:10.21203/rs.3.rs-2997601/v1), 2023-06-22
Supplement: Supplementary file 1 [file 0f4be9fe7a3122bb913fda99.xlsx]

## Sheet: Table S1
Table S1. Characteristic of mcr-harboring E. coli isoaltes used in this study
Strains	Bcaterial spp.	Origin	Sample	Country	Isolation	MLST	Colistin MIC (mg/L)	Colistin resistance	mcr-harboring plasmid	Plasmid name	Plasmid size (kb)	Accession number	Reference (PMID)
SMEc189	E. coli	human	cervical secretions	Japan	2017	ST23	2	mcr-1.1	pIncI2	pSMEc189-mcr-1	61.259	NZ_AP019686.1	29476984
EC416	E. coli	pig	feces	Japan	2012	ST10	16	mcr-1.1	pIncI2	pEC416_2	61.732	AP027402	in this study
EC507	E. coli	pig	feces	Japan	2012	ND	8	mcr-1.1	pIncI2	pEC507_2	61.975	AP027406	in this study
EC521	E. coli	pig	feces	Japan	2012	10	8	mcr-1.1	pIncI2	pEC521_1	60.712	AP027410	in this study
A1	E. coli	envioronment	waste water	Japan	2018	ST131	8	mcr-1.1	pIncX4	pA1	33.309	LC477138	31492666
A2	E. coli	envioronment	waste water	Japan	2018	ST871	8	mcr-1.1	pIncX4	pA2	33.309	LC477294	31492666
B1	E. coli	envioronment	waste water	Japan	2018	ST767	8	mcr-1.1	pIncX4	pB1	33.858	LC479452	31492666
EC361	E. coli	pig	feces	Japan	2012	ST101	4	mcr-3.1	pIncHI2	pEC361_1	253.349	AP027416	in this study
EC476	E. coli	pig	feces	Japan	2012	ST648	4	mcr-3.1	pIncHI2	pEC476	284.849	AP027418	in this study
EC261	E. coli	pig	feces	Japan	2012	ST101	2	mcr-3.1	pIncHI2	pEC261_1	249.953	AP027422	in this study
B27	E. coli	fly	whole body	Thailand	2015	ST1638	8	mcr-3.1	pIncP1	pB27_3	50.526	AP027427	in this study
EC581	E. coli	pig	feces	Japan	2012	ST1	2	mcr-5.1	pIncFII	pEC581_3	72.582	AP027429	in this study
EC571	E. coli	pig	feces	Japan	2012	ST1	4	mcr-5.1	pIncFII	pEC571_2	72.586	AP027434	in this study
EC556	E. coli	pig	feces	Japan	2012	ST1	8	mcr-5.1	pIncFII	pEC556_2	72.582	AP027438	in this study
EC92	E. coli	pig	feces	Japan	2012	ST42	16	mcr-1.1, mcr-5.1	pIncI2, pIncFII	pEC92_1, pEC92_2	61.259, 73.205	LC763831, LC763832	in this study
EC181	E. coli	pig	feces	Japan	2012	ST410	16	mcr-1.1, mcr-5.1	pIncI2, pIncFII	pEC181, pIncFIIEC181	66.397, 66.397	LC763833	in this study
EC291	E. coli	pig	feces	Japan	2012	ST165	16	mcr-1.1, mcr-5.1	pIncI2, pIncFIB	pEC291_2, pEC291_1	60.733, 98.615	AP027443, AP027444	in this study
CST, colistin; ND, not determined

## Sheet: Table S2
Table S2. Colistin susceptibility of chromosome- and plasmid-mediated colistin-resistant E. coli ST131 mutants
CST-resistant E. coli ST131 mutants					Donor E. coli isolates			Reference (PMID)
Mutants	CST-resistant determinants	CST-resistant factors	CST MIC (mg/L)		Donors	Origin	CST MIC (mg/L)
SME98	none	none	0.5		none	none	none	29914952
SME98PORTpmrA105	chromosome-mediated	PmrA (L105P)	16		SRE44	human	16	29914952
SME98PORTpmrB34	chromosome-mediated	PmrB (Δ27_45)	16		SRE34	human	16	29914952
SME98PORTpmrB206	chromosome-mediated	PmrB (G206)	8		SME222, SME296	human	4 or 8	29914952
SME98/pIncI2_mcr-1	plasmid-mediated	mcr-1.1	8		EC92	pig	8	in this study
SME98/pIncI2_Δmcr-1	none	none	0.25		EC92	pig	8	in this study
SME98/pIncX4_mcr-1	plasmid-mediated	mcr-1.1	8		B1	waste watere	8	in this study
SME98/pIncX4_Δmcr-1	none	none	0.5		B1	waste watere	8	in this study
SME98/pIncFIB_mcr-3	plasmid-mediated	mcr-3.1	8		B27	fly	8	in this study
SME98/pIncFIB_Δmcr-3	none	none	0.25-0.5		B27	fly	8	in this study
SME98/pIncFII_mcr-5	plasmid-mediated	mcr-5.1	8		EC181	pig	8	in this study
SME98/pIncFII_Δmcr-5	none	none	0.5		EC181	pig	8	in this study
CST, colistin

## Sheet: Table S3
Table S3. Selected 486 genes that significantly changed the transcriptions by acquisition of pIncI2_mcr-1 in SME98 among the 2609 shared genes with E. coli BL21
Genes	Max group mean	Log₂ fold change (vs SME98)	Fold change (vs SME98)	p-value	FDR p-value	Bonferroni
purT	201.899	-2.97392	-7.85666	4.99318e-27	2.65076e-25	2.12061e-23
hycA	203.973	-2.962	-7.79203	1.18661e-31	6.99935e-30	5.03953e-28
malG	378.895	-2.95884	-7.77499	5.32579e-19	2.01952e-17	2.26186e-15
xanP	684.611	-2.88083	-7.36572	3.19048e-30	1.78289e-28	1.355e-26
hydN	218.88	-2.82284	-7.07553	7.11297e-40	4.79504e-38	3.02088e-36
purC	759.718	-2.709	-6.53868	4.28088e-28	2.30138e-26	1.81809e-24
purH	618.849	-2.63505	-6.21199	6.10651e-31	3.50464e-29	2.59344e-27
purM	768.185	-2.61359	-6.12025	1.16217e-29	6.41006e-28	4.93575e-26
malM	677.912	-2.54333	-5.82934	3.96416e-13	1.10762e-11	1.68358e-09
purD	546.315	-2.46657	-5.52726	3.91487e-23	1.78779e-21	1.66264e-19
lamB	1819.34	-2.44957	-5.46252	2.37897e-12	6.08643e-11	1.01035e-08
purF	685.654	-2.43987	-5.42592	2.05921e-26	1.05367e-24	8.74544e-23
yhjA	65.0912	-2.41356	-5.32788	1.29508e-13	3.79325e-12	5.50022e-10
citT	151.069	-2.39659	-5.26557	4.69347e-22	1.99332e-20	1.99332e-18
hycB	117.242	-2.39646	-5.26511	3.12704e-19	1.19644e-17	1.32805e-15
cvpA	796.069	-2.37695	-5.19438	4.76555e-26	2.38109e-24	2.02393e-22
citD	88.799	-2.3575	-5.1248	1.23733e-19	4.86568e-18	5.25493e-16
purL	299.337	-2.30242	-4.93283	6.43215e-25	3.13992e-23	2.73173e-21
malE	2310.96	-2.27537	-4.84121	4.19351e-12	1.04764e-10	1.78098e-08
purN	537.981	-2.15468	-4.45269	3.4619e-20	1.37408e-18	1.47027e-16
purE	296.977	-2.13182	-4.38271	1.58233e-22	7.07384e-21	6.72014e-19
purK	363.695	-2.12759	-4.36986	4.19876e-22	1.80123e-20	1.78321e-18
citX	72.9736	-2.10091	-4.28979	5.7204e-14	1.74781e-12	2.42945e-10
treC	245.585	-2.07017	-4.19937	5.91885e-13	1.6323e-11	2.51374e-09
codB	99.6422	-2.00039	-4.00107	1.7223e-19	6.64965e-18	7.31462e-16
ansB	1322.1	-1.95897	-3.88783	6.40544e-14	1.94314e-12	2.72039e-10
citG	15.583	-1.92148	-3.78812	7.72875e-13	2.0907e-11	3.2824e-09
citE	98.9396	-1.90659	-3.74922	3.92062e-15	1.26143e-13	1.66509e-11
glpQ	233.881	-1.86595	-3.64508	3.12343e-05	0.00025975	0.132652
grxA	421.681	-1.84112	-3.58288	5.62299e-17	2.00679e-15	2.38808e-13
tdcD	106.383	-1.83578	-3.56965	3.53028e-05	0.000290002	0.149931
glyA	1856.69	-1.82954	-3.55424	1.08749e-16	3.84881e-15	4.61857e-13
malQ	70.4402	-1.79235	-3.4638	2.58758e-09	4.75733e-08	1.09894e-05
malF	341.316	-1.75446	-3.374	1.9964e-06	2.29775e-05	0.00847871
dps	1824.3	-1.7529	-3.37035	3.95558e-15	1.26311e-13	1.67994e-11
glpT	292.096	-1.71032	-3.27234	6.46022e-05	0.000495245	0.274366
yaaA	253.537	-1.69906	-3.2469	5.47924e-13	1.52094e-11	2.32703e-09
codA	168.623	-1.69875	-3.24621	2.47064e-23	1.14052e-21	1.04928e-19
stpA	629.697	-1.69044	-3.22754	7.19978e-15	2.2819e-13	3.05775e-11
treB	368.97	-1.63397	-3.10365	1.18582e-09	2.28917e-08	5.03618e-06
ahpF	1457.17	-1.57366	-2.97658	5.02567e-14	1.54667e-12	2.1344e-10
tdcF	240.022	-1.56613	-2.9611	1.00348e-10	2.18554e-09	4.2618e-07
trxC	299.82	-1.54981	-2.92778	1.18518e-10	2.56809e-09	5.03345e-07
rbbA	48.3073	-1.51271	-2.85345	2.22916e-10	4.71008e-09	9.46725e-07
pyrB	216.432	-1.49632	-2.82122	1.50451e-13	4.37647e-12	6.38965e-10
yfcC	179.49	-1.47493	-2.7797	7.37386e-12	1.79982e-10	3.13168e-08
yhhJ	32.144	-1.46886	-2.76803	2.39787e-09	4.46655e-08	1.01837e-05
hycE	75.31	-1.45686	-2.7451	7.54459e-11	1.69534e-09	3.20419e-07
alsE	18.4166	-1.42852	-2.69171	9.47403e-05	0.000696128	0.402362
pyrI	206.088	-1.42692	-2.68871	1.05183e-13	3.14587e-12	4.46714e-10
hycH	154.655	-1.42345	-2.68227	1.73762e-10	3.70838e-09	7.37968e-07
hypF	31.2781	-1.41364	-2.66409	1.50695e-09	2.85715e-08	6.40002e-06
pyrE	423.757	-1.41195	-2.66096	7.83053e-12	1.90036e-10	3.32563e-08
malX	35.6239	-1.37322	-2.59047	2.55556e-06	2.85617e-05	0.0108534
hemH	183.546	-1.34601	-2.54207	2.82574e-08	4.47795e-07	0.000120009
malS	95.3203	-1.33805	-2.52809	2.12108e-05	0.000183655	0.0900821
ahpC	5732.31	-1.32219	-2.50045	1.87289e-11	4.39456e-10	7.95416e-08
manY	1006.88	-1.30291	-2.46726	7.58043e-09	1.31404e-07	3.21941e-05
mdh	273.216	-1.30079	-2.46364	3.67998e-06	3.96672e-05	0.0156289
dsdX	205.43	-1.29861	-2.45991	8.52452e-07	1.07111e-05	0.00362036
manZ	1187.84	-1.27896	-2.42664	1.22652e-08	2.04275e-07	5.20901e-05
dcuC	214.507	-1.25978	-2.3946	2.73541e-09	5.00745e-08	1.16173e-05
manX	1034.98	-1.25626	-2.38876	2.14302e-08	3.48713e-07	9.1014e-05
lpp	22753.2	-1.23164	-2.34834	6.29351e-13	1.72442e-11	2.67285e-09
ghoS	48.4012	-1.22339	-2.33495	3.45156e-06	3.76832e-05	0.0146588
pepE	271.609	-1.1865	-2.276	7.88257e-12	1.90212e-10	3.34773e-08
sdaC	2576.82	-1.18242	-2.26957	8.29257e-10	1.64573e-08	3.52185e-06
yifE	1658.81	-1.16939	-2.24916	7.55536e-09	1.31404e-07	3.20876e-05
pyrC	191.665	-1.16375	-2.24038	2.23721e-08	3.59903e-07	9.50143e-05
guaB	883.264	-1.15753	-2.23075	1.74341e-07	2.45174e-06	0.000740426
alsB	33.3488	-1.1553	-2.22731	0.000487733	0.00292571	1
malK	1176.24	-1.13891	-2.20215	0.000683839	0.0038879	1
glgB	98.5195	-1.10531	-2.15146	1.86962e-08	3.05396e-07	7.94029e-05
nrdD	228.746	-1.09346	-2.13385	1.45663e-07	2.08293e-06	0.000618629
ydhV	14.994	-1.07433	-2.10574	3.24132e-06	3.54791e-05	0.0137659
malT	223.259	-1.06755	-2.09587	1.58378e-06	1.86842e-05	0.00672633
cysP	43.1543	-1.06425	-2.09109	3.39476e-12	8.63325e-11	1.44175e-08
ebgA	11.5589	-1.05177	-2.07307	1.24316e-05	0.000114033	0.0527972
pyrD	280.542	-1.04977	-2.0702	2.07079e-06	2.37693e-05	0.00879464
mprA	986.325	-1.04914	-2.0693	3.4255e-07	4.61845e-06	0.00145481
ydfZ	444.744	-1.0451	-2.06351	4.26579e-07	5.64386e-06	0.00181168
aspA	5023.02	-1.03519	-2.04939	4.15133e-09	7.43911e-08	1.76307e-05
yobD	53.2751	-1.03118	-2.04369	9.53141e-06	9.03569e-05	0.0404799
cysI	51.9762	-1.02664	-2.03727	3.77789e-12	9.55042e-11	1.60447e-08
dcuA	1000.6	-0.997466	-1.99649	2.08558e-06	2.38746e-05	0.00885747
yjjI	39.9807	-0.991391	-1.9881	8.92056e-07	1.10777e-05	0.00378856
ptsG	3072.19	-0.98897	-1.98477	6.11571e-10	1.22516e-08	2.59734e-06
dnaK	1633.01	-0.984199	-1.97821	1.73815e-07	2.45174e-06	0.000738191
glmS	1675.52	-0.983174	-1.97681	4.10791e-08	6.36726e-07	0.000174463
glpX	266.697	-0.98143	-1.97442	6.17152e-06	6.18171e-05	0.0262105
yfcE	243.373	-0.978688	-1.97067	1.60299e-13	4.59993e-12	6.8079e-10
cspD	337.396	-0.970661	-1.95974	5.04469e-06	5.1626e-05	0.0214248
yohJ	57.0691	-0.967635	-1.95563	0.000564451	0.00330196	1
carA	151.494	-0.967009	-1.95478	1.21242e-06	1.47964e-05	0.00514913
ygiW	69.2351	-0.963047	-1.94942	8.14519e-09	1.40051e-07	3.45926e-05
hycI	152.865	-0.961388	-1.94718	9.43205e-07	1.16787e-05	0.00400579
hybA	315.928	-0.951822	-1.93431	2.5305e-06	2.83563e-05	0.010747
hybO	551.128	-0.951133	-1.93339	2.46997e-06	2.77512e-05	0.01049
tdk	146.673	-0.951007	-1.93322	4.16583e-07	5.52884e-06	0.00176923
frdB	1370.05	-0.942663	-1.92207	1.35183e-06	1.61724e-05	0.00574121
yfdY	42.798	-0.942459	-1.9218	0.000472705	0.00283958	1
adiY	58.3571	-0.937398	-1.91507	0.000119046	0.000846883	0.505589
tsx	1334.67	-0.934267	-1.91092	6.36142e-06	6.32716e-05	0.027017
fadL	482.562	-0.923462	-1.89666	2.74849e-06	3.04774e-05	0.0116729
pspE	195.593	-0.91382	-1.88403	1.30206e-05	0.000118666	0.0552984
gloA	394.625	-0.912009	-1.88166	1.93809e-06	2.2428e-05	0.00823108
dsdA	776.039	-0.910038	-1.87909	2.95894e-05	0.000249833	0.125666
ydjN	449.731	-0.899793	-1.8658	7.44202e-06	7.29811e-05	0.0316062
cysJ	41.6094	-0.895911	-1.86078	4.9903e-07	6.50116e-06	0.00211938
folD	307.51	-0.886728	-1.84898	1.29037e-05	0.000117854	0.054802
ppa	2986.72	-0.884827	-1.84654	7.82127e-06	7.5665e-05	0.0332169
yiaY	21.9282	-0.878736	-1.83876	1.88896e-07	2.62171e-06	0.000802243
hypB	210.479	-0.878363	-1.83829	1.38488e-07	1.99376e-06	0.000588158
eno	8260.21	-0.874008	-1.83275	9.17831e-13	2.46438e-11	3.89803e-09
dcuB	135.511	-0.870086	-1.82777	8.60279e-07	1.07459e-05	0.00365361
cysA	78.5327	-0.866765	-1.82357	4.78182e-07	6.24873e-06	0.00203084
groL	1736.64	-0.864646	-1.82089	4.0569e-06	4.28598e-05	0.0172296
katG	393.785	-0.863369	-1.81928	0.00018167	0.00122469	0.771554
tpiA	3751.35	-0.86215	-1.81774	1.18056e-06	1.44491e-05	0.00501385
cspE	6705.7	-0.861455	-1.81687	1.57826e-05	0.00014171	0.0670288
yhbV	104.806	-0.856609	-1.81078	3.07123e-06	3.37915e-05	0.0130435
ibpA	201.366	-0.851236	-1.80405	6.59348e-07	8.40916e-06	0.00280025
frdA	1263.41	-0.848884	-1.80111	7.49306e-06	7.31564e-05	0.031823
yihI	624.541	-0.842474	-1.79312	1.10199e-05	0.000103513	0.0468016
pepT	169.192	-0.842231	-1.79282	3.10632e-05	0.000259185	0.131925
nupC	993.49	-0.838835	-1.78861	5.38123e-05	0.000424009	0.228541
rpiA	596.5	-0.837338	-1.78675	1.21427e-05	0.000111866	0.0515701
yeiP	336.953	-0.8361	-1.78522	1.89413e-05	0.000166896	0.0804437
ulaG	17.6575	-0.833318	-1.78178	4.05105e-06	4.28598e-05	0.0172048
hybB	166.458	-0.828359	-1.77566	1.82882e-05	0.000161476	0.07767
yeeX	1160.77	-0.828053	-1.77529	1.12101e-05	0.000104636	0.0476093
yfcD	313.26	-0.825199	-1.77178	1.6493e-06	1.92864e-05	0.00700458
frdD	1157.24	-0.821794	-1.7676	3.77407e-05	0.000306472	0.160285
nrdG	73.2334	-0.820144	-1.76558	0.000261434	0.00168782	1
frdC	1520.91	-0.818582	-1.76367	1.22574e-05	0.000112678	0.052057
uxaB	57.1031	-0.818256	-1.76327	1.1727e-05	0.000108271	0.0498048
rihA	135.143	-0.814802	-1.75906	0.000135626	0.000952071	0.576003
hypC	132.566	-0.808897	-1.75187	0.000109494	0.00078817	0.46502
cysS	376.368	-0.806618	-1.74911	8.53976e-05	0.000632956	0.362684
yqfB	153.388	-0.805525	-1.74778	0.000853643	0.00472943	1
yeeN	569.778	-0.804687	-1.74677	2.42033e-05	0.00020808	0.102791
slyB	1110.8	-0.801219	-1.74257	6.5515e-05	0.000500436	0.278242
yggL	616.703	-0.799693	-1.74073	2.53643e-05	0.000216745	0.107722
ompW	447.486	-0.793746	-1.73357	0.00015099	0.00104952	0.641256
bioA	85.9414	-0.792002	-1.73148	0.000201208	0.00134149	0.854529
ybeD	347.358	-0.789333	-1.72828	1.49579e-05	0.000134875	0.0635262
gpt	809.492	-0.789091	-1.72799	5.16487e-05	0.000407718	0.219352
hslV	453.201	-0.787548	-1.72614	0.000226752	0.00148385	0.963018
prmA	306.22	-0.786272	-1.72461	0.000110886	0.000794154	0.470933
bsmA	201.379	-0.785583	-1.72379	0.000548396	0.00321691	1
hypE	202.142	-0.780368	-1.71757	0.00013022	0.000919699	0.553043
kdsA	896.595	-0.775556	-1.71185	7.3523e-05	0.000555609	0.312252
manA	161.335	-0.773648	-1.70959	3.14118e-05	0.000260558	0.133406
pgi	846.967	-0.764981	-1.69935	0.000109176	0.000787214	0.463669
ddlA	305.414	-0.759111	-1.69245	5.01103e-05	0.00039631	0.212818
potD	608.198	-0.755598	-1.68833	0.000197259	0.00131931	0.83776
efp	4264.49	-0.752954	-1.68524	9.57049e-05	0.000702001	0.406459
yqiC	474.937	-0.752108	-1.68425	5.96352e-06	6.00167e-05	0.0253271
mipA	669.753	-0.750638	-1.68254	0.000185018	0.00124331	0.78577
feoA	139.057	-0.747286	-1.67863	0.000250704	0.00162804	1
pfkA	1406.38	-0.74425	-1.6751	0.000223219	0.00146524	0.94801
hfq	1992.88	-0.743842	-1.67463	0.000173728	0.00117863	0.737824
metK	907.24	-0.739505	-1.6696	0.000459405	0.00277144	1
cysW	31.4479	-0.739101	-1.66914	0.000101652	0.000739238	0.431715
acuI	98.3873	-0.737817	-1.66765	0.000452138	0.00273537	1
exbB	177.757	-0.737736	-1.66756	2.22926e-08	3.59903e-07	9.46768e-05
pdxY	128.726	-0.734825	-1.6642	0.000177289	0.00119705	0.752946
glgX	93.7357	-0.734197	-1.66347	0.00021877	0.00144049	0.929117
grcA	5827.29	-0.732736	-1.66179	6.89365e-05	0.000523745	0.292773
speB	165.612	-0.732261	-1.66124	0.000185763	0.00124634	0.788936
hupB	2082.82	-0.730723	-1.65947	0.000111596	0.000797893	0.473948
pta	2811.92	-0.729651	-1.65824	2.54746e-09	4.72448e-08	1.08191e-05
guaA	360.78	-0.727192	-1.65541	0.000357931	0.00223549	1
fhlA	56.6302	-0.726728	-1.65488	2.67997e-05	0.000227637	0.113818
yciI	172.414	-0.724624	-1.65247	0.000620921	0.00359272	1
htpG	657.093	-0.721522	-1.64892	0.000543076	0.00319252	1
yihD	624.916	-0.718004	-1.6449	1.77428e-05	0.000156987	0.0753537
hdhA	25.4786	-0.717489	-1.64432	0.000339197	0.00213735	1
yajQ	923.749	-0.716866	-1.64361	0.000351481	0.00220168	1
arnT	13.8929	-0.716078	-1.64271	2.41234e-05	0.000207814	0.102452
ygiN	873.652	-0.705686	-1.63092	0.000439934	0.00266914	1
ackA	5160.11	-0.705543	-1.63076	8.3163e-09	1.42417e-07	3.53193e-05
potC	148.098	-0.704009	-1.62902	6.50381e-05	0.000497688	0.276217
yliF	23.8837	-0.696456	-1.62052	0.000836247	0.00464254	1
ychF	647.811	-0.693797	-1.61754	0.000400754	0.0024631	1
yagU	355.492	-0.693672	-1.6174	0.000340358	0.00214149	1
pal	1837.85	-0.693174	-1.61684	0.000295677	0.00188549	1
waaL	155.82	-0.6911	-1.61451	0.000536715	0.00316587	1
metN	78.3101	-0.688183	-1.61125	0.00038081	0.00235073	1
hybC	83.7959	-0.687893	-1.61093	8.18067e-05	0.000610603	0.347433
cdh	85.0936	-0.683443	-1.60597	0.000708068	0.0040149	1
grpE	1015.02	-0.678129	-1.60006	0.000646133	0.00372337	1
folA	217.249	-0.676374	-1.59812	2.88351e-07	3.92509e-06	0.00122463
elbB	109.393	-0.676344	-1.59808	3.42332e-05	0.000282307	0.145388
tolB	373.674	-0.673789	-1.59526	0.00079176	0.00443615	1
glk	79.5664	-0.672562	-1.5939	0.000349572	0.00219296	1
yahA	289.41	-0.670803	-1.59196	0.000676745	0.00386143	1
panB	361.166	-0.66726	-1.58805	0.000510205	0.00303479	1
ptsH	5161.06	-0.667238	-1.58803	0.000664754	0.00380486	1
purA	1202.66	-0.666158	-1.58684	0.000812524	0.00453455	1
pdxK	84.0961	-0.665973	-1.58664	1.61924e-06	1.8997e-05	0.00687691
cspC	3612.62	-0.665288	-1.58589	0.000423847	0.00259004	1
bcsC	44.1581	-0.664763	-1.58531	0.000727743	0.00412097	1
yfeX	192.704	-0.652783	-1.5722	0.000399502	0.00245896	1
queF	172.824	-0.651956	-1.5713	0.000566532	0.00330957	1
rplU	9503.96	-0.650852	-1.5701	0.000390791	0.00240884	1
acpP	9336.24	-0.650425	-1.56963	0.000509641	0.00303479	1
fklB	554.369	-0.647183	-1.56611	0.000529566	0.00312805	1
carB	118.331	-0.645239	-1.564	0.000609649	0.00353231	1
iadA	156.644	-0.644599	-1.56331	0.000416704	0.00255743	1
panC	386.665	-0.643652	-1.56228	0.000472091	0.00283958	1
ppiB	1505.17	-0.627342	-1.54472	0.00086007	0.00474379	1
orn	199.617	-0.627188	-1.54455	0.000203321	0.00135345	0.863504
potB	98.5195	-0.617955	-1.5347	0.000787437	0.00441776	1
ribC	248.559	-0.612569	-1.52898	0.000260183	0.00168445	1
grxC	500.717	-0.608947	-1.52515	3.78489e-06	4.05919e-05	0.0160744
yhdT	71.9265	-0.598919	-1.51458	0.000858735	0.00474258	1
gapA	11527	-0.591978	-1.50731	1.30857e-06	1.56992e-05	0.00555751
rdgC	74.7547	-0.589023	-1.50423	0.000379687	0.00234721	1
pykF	1736.68	-0.585374	-1.50043	0.000854126	0.00472943	1
ompC	20937.8	-0.585245	-1.50029	1.70502e-06	1.97848e-05	0.00724122
nikR	94.7747	-0.581987	-1.49691	0.000241471	0.00157049	1
mdaB	130.048	-0.568692	-1.48318	0.000373076	0.0023097	1
ydcL	77.3083	-0.552698	-1.46683	0.000121213	0.000860855	0.514791
ompA	13953.1	-0.546986	-1.46103	7.76249e-06	7.52678e-05	0.0329673
osmE	113.628	-0.542971	-1.45697	0.000305688	0.0019435	1
yqjD	393.146	-0.51113	-1.42517	0.000105311	0.000763235	0.447256
yaeQ	91.7542	-0.50038	-1.41459	0.000513034	0.00304735	1
rpmG	714.75	-0.498561	-1.4128	0.000154757	0.00106713	0.657255
rplM	11004	-0.492401	-1.40678	5.82317e-05	0.000450474	0.24731
rnk	170.366	-0.48689	-1.40142	0.000422927	0.00258814	1
rcsC	48.8328	0.466196	1.38146	0.00042845	0.00261065	1
ypdA	60.8113	0.588102	1.50327	0.000816882	0.00455288	1
gltI	97.5971	0.600388	1.51612	0.000515892	0.00306004	1
yegE	11.37	0.653658	1.57315	0.000787029	0.00441776	1
nirD	61.2815	0.659856	1.57993	0.000604647	0.00350811	1
yejE	27.5103	0.68353	1.60606	5.76858e-05	0.000448703	0.244992
aroG	154.111	0.688694	1.61182	4.19845e-05	0.00033643	0.178308
thrB	38.7721	0.697977	1.62223	0.000540347	0.00318287	1
serA	75.649	0.705856	1.63111	2.98552e-05	0.000251512	0.126795
rsxB	82.7436	0.741244	1.67162	0.000208425	0.00137879	0.88518
ilvE	41.9108	0.74894	1.68056	0.000172202	0.00117015	0.731343
ybaY	41.2145	0.751241	1.68324	0.00045703	0.00276103	1
yhfZ	53.3629	0.755623	1.68836	0.000142989	0.00100045	0.607276
ilvD	49.4822	0.758334	1.69154	6.8919e-06	6.80695e-05	0.0292699
ilvA	54.564	0.762833	1.69682	1.60851e-05	0.000143818	0.0683134
eptB	45.8174	0.768294	1.70325	0.000151291	0.00104989	0.642532
umuC	14.4495	0.771765	1.70736	0.000369144	0.0022887	1
kdpD	321.455	0.774972	1.71116	0.00028759	0.00183945	1
betA	18.9749	0.777516	1.71418	3.37417e-05	0.000278796	0.143301
gltJ	24.5167	0.780667	1.71792	0.000419384	0.00257016	1
degP	241.107	0.783421	1.72121	4.16136e-05	0.000334195	0.176733
rpoC	2292.96	0.784864	1.72293	1.44066e-10	3.10582e-09	6.11847e-07
yifB	16.7192	0.788053	1.72674	0.000154781	0.00106713	0.657353
yadS	58.9745	0.800639	1.74187	0.000163096	0.00111901	0.692669
thrA	33.3275	0.800999	1.74231	1.66604e-05	0.000148027	0.0707567
npr	65.2047	0.803546	1.74539	0.000504771	0.00301514	1
secG	4637.16	0.806589	1.74907	7.21393e-05	0.000546124	0.306376
dppF	35.8288	0.807108	1.7497	0.000143854	0.0010032	0.610947
gltA	39.8869	0.812926	1.75677	3.12532e-05	0.00025975	0.132732
pgaA	9.29161	0.814171	1.75829	8.42654e-06	8.11508e-05	0.0357875
rpoE	384.323	0.820689	1.76625	3.95109e-05	0.000319017	0.167803
mdtG	14.023	0.826765	1.7737	0.000105888	0.000766113	0.449708
prfH	36.9943	0.830846	1.77873	1.34561e-05	0.000122205	0.0571481
nepI	20.484	0.832133	1.78032	0.000109809	0.000789103	0.46636
clcB	12.3338	0.854771	1.80847	0.000871206	0.00479276	1
tomB	77.0865	0.865172	1.82156	5.14896e-07	6.68734e-06	0.00218676
sthA	159.701	0.868622	1.82592	2.48239e-05	0.000212554	0.105427
csdE	191.788	0.877692	1.83743	6.49452e-08	9.68432e-07	0.000275822
yeaG	9.08025	0.885379	1.84725	9.87366e-05	0.000720506	0.419334
xseA	165.559	0.887995	1.8506	4.67685e-06	4.82102e-05	0.0198626
yfeY	104.649	0.90044	1.86664	0.000261499	0.00168782	1
cycA	49.6147	0.900471	1.86667	3.95056e-06	4.20502e-05	0.016778
cutC	61.9815	0.905259	1.87288	3.17815e-06	3.48775e-05	0.0134976
yhbX	12.8059	0.920995	1.89342	3.54392e-05	0.00029056	0.15051
ybjJ	37.7322	0.921866	1.89456	1.63477e-05	0.000145859	0.0694289
fepA	7.65244	0.923977	1.89734	4.32742e-06	4.53791e-05	0.0183786
queG	63.8025	0.927302	1.90172	2.35181e-06	2.6635e-05	0.00998813
yeeY	14.3971	0.934147	1.91076	0.00051955	0.00307745	1
yceA	31.2768	0.937591	1.91533	2.74308e-07	3.74594e-06	0.00116499
ymfA	24.0444	0.938603	1.91667	0.000909272	0.0049636	1
yhbW	35.8156	0.941668	1.92075	1.52031e-05	0.000136796	0.0645676
soxS	294.637	0.945916	1.92641	4.42994e-07	5.84284e-06	0.00188139
aaeB	16.4542	0.946009	1.92654	2.99067e-05	0.000251512	0.127014
cyoE	50.203	0.947436	1.92844	5.80592e-06	5.8849e-05	0.0246577
adhP	17.3325	0.951203	1.93348	6.0741e-05	0.000467332	0.257967
aidB	7.17161	0.955546	1.93931	0.000747853	0.00421797	1
yihF	7.5119	0.956179	1.94016	0.000818826	0.00455774	1
yfcJ	57.8093	0.963844	1.9505	2.45764e-06	2.7686e-05	0.0104376
pnuC	95.9775	0.968644	1.957	1.58963e-06	1.87013e-05	0.00675117
yjfC	10.3342	0.970512	1.95954	0.000651767	0.00374568	1
sdhA	69.2746	0.976207	1.96729	0.000154209	0.00106665	0.654926
kdpE	186.41	0.981189	1.97409	6.48771e-07	8.32426e-06	0.00275533
yoaE	103.131	0.983787	1.97765	1.53211e-13	4.42644e-12	6.50687e-10
yccM	17.0982	0.990942	1.98748	1.71109e-05	0.000151712	0.07267
yejG	100.243	0.991593	1.98838	1.65753e-06	1.92864e-05	0.00703953
nsrR	39.9125	1.0036	2.005	2.67259e-05	0.000227465	0.113505
clsC	21.319	1.00502	2.00697	4.3203e-09	7.70937e-08	1.83483e-05
kbaZ	11.9767	1.0074	2.01029	0.000130365	0.000919699	0.553659
betB	36.6023	1.01839	2.02566	6.12828e-08	9.29529e-07	0.000260268
ilvG	24.5173	1.02524	2.0353	1.0103e-06	1.24731e-05	0.00429076
xdhD	10.6321	1.02833	2.03965	2.88083e-09	5.25102e-08	1.22349e-05
fumC	8.54841	1.03323	2.0466	0.000267181	0.00171667	1
sugE	109.515	1.03823	2.0537	5.60668e-07	7.21563e-06	0.00238116
cyoD	61.8	1.03824	2.05371	3.86138e-06	4.12042e-05	0.0163993
ycaI	7.48237	1.04207	2.05917	7.04641e-06	6.92734e-05	0.0299261
lysA	22.9236	1.04458	2.06277	6.33809e-08	9.57932e-07	0.000269179
ilvB	26.3311	1.04594	2.06471	3.95692e-07	5.26804e-06	0.0016805
nrdE	4.15641	1.05196	2.07335	0.000832277	0.00462655	1
entF	7.55476	1.06866	2.09749	1.20496e-09	2.3156e-08	5.11747e-06
ygfK	2.47048	1.07617	2.10843	0.000330066	0.002086	1
cyoC	60.8517	1.07844	2.11176	1.49031e-07	2.12395e-06	0.000632936
putA	13.8205	1.09127	2.13061	1.75172e-07	2.4553e-06	0.000743955
ypfG	17.3138	1.1033	2.14845	8.59516e-06	8.2401e-05	0.0365036
ligB	16.8127	1.10424	2.14985	1.08476e-06	1.33324e-05	0.00460697
fadA	9.47276	1.12705	2.18411	5.61188e-05	0.000440548	0.238337
yjfF	10.7373	1.1439	2.20978	0.000884066	0.00484468	1
nadB	11.4263	1.15274	2.22335	3.91542e-07	5.22917e-06	0.00166288
kduI	15.6332	1.15283	2.2235	0.000139144	0.000975157	0.590945
eutL	8.02508	1.15419	2.22559	0.000867347	0.00477772	1
yciW	16.0938	1.16484	2.24209	8.23949e-07	1.04146e-05	0.00349931
fhuD	30.8153	1.16517	2.24259	1.22999e-07	1.78286e-06	0.000522377
pitB	5.338	1.16886	2.24834	0.000165296	0.00112864	0.702012
xylH	11.8744	1.16922	2.2489	3.03368e-05	0.000254123	0.128841
leuC	12.8855	1.17352	2.25561	1.11735e-08	1.87565e-07	4.74539e-05
torD	14.5399	1.17438	2.25696	0.000207778	0.00137665	0.882434
potE	18.5183	1.17849	2.2634	2.95213e-09	5.358e-08	1.25377e-05
ydiU	27.0276	1.17944	2.26488	2.84726e-08	4.49528e-07	0.000120923
ynfH	10.8321	1.18283	2.27022	0.000543487	0.00319252	1
aslB	28.714	1.18608	2.27533	3.14918e-08	4.91712e-07	0.000133746
cyoB	141.121	1.20273	2.30175	1.0474e-08	1.77223e-07	4.4483e-05
emrE	70.9186	1.20396	2.30372	4.14118e-09	7.43911e-08	1.75876e-05
gspA	8.7574	1.20552	2.30621	2.12325e-05	0.000183655	0.0901745
dppA	34.9393	1.21542	2.32208	1.15816e-08	1.9365e-07	4.9187e-05
gudP	6.66132	1.22061	2.33045	0.000354596	0.00221792	1
ybiO	11.8894	1.22067	2.33055	4.55665e-08	7.01162e-07	0.000193521
proX	55.6564	1.23088	2.3471	1.06032e-08	1.78698e-07	4.50319e-05
fadJ	16.6294	1.23215	2.34918	7.48195e-09	1.30765e-07	3.17759e-05
phnI	7.7311	1.23659	2.35641	1.40388e-05	0.000126857	0.0596228
aceF	518.186	1.23859	2.35968	4.74847e-10	9.69556e-09	2.01668e-06
napG	26.4203	1.24256	2.36619	6.49878e-08	9.68432e-07	0.000276003
yebQ	11.2383	1.24547	2.37095	7.45792e-06	7.29811e-05	0.0316738
ydcR	15.7583	1.24789	2.37494	1.52611e-10	3.27343e-09	6.48139e-07
yfaS	4.40482	1.26315	2.4002	1.87418e-07	2.60972e-06	0.000795964
ylaC	68.2533	1.26452	2.40247	6.54197e-13	1.78101e-11	2.77837e-09
fiu	6.08636	1.26525	2.40369	3.55484e-05	0.000290895	0.150974
leuA	9.53957	1.26632	2.40547	3.67346e-06	3.96672e-05	0.0156012
glcC	24.0661	1.27535	2.42058	2.1755e-08	3.52647e-07	9.23935e-05
acnA	26.0079	1.27573	2.42121	1.38619e-09	2.65187e-08	5.88715e-06
adiA	10.7429	1.28083	2.42979	9.72359e-11	2.12866e-09	4.12961e-07
yhdX	8.71344	1.28553	2.43771	0.000115294	0.000821568	0.489655
insK_1	15.1078	1.28579	2.43816	0.000159905	0.00109893	0.679116
leuD	19.9773	1.28685	2.43995	6.63785e-06	6.57131e-05	0.0281909
betI	54.9077	1.29574	2.45503	9.33353e-10	1.83516e-08	3.96395e-06
fhuB	18.5436	1.31263	2.48394	5.85255e-11	1.34356e-09	2.48558e-07
dppC	9.71883	1.33103	2.51583	1.14004e-05	0.000106179	0.0484176
ugpB	10.8978	1.33236	2.51813	2.65288e-05	0.00022624	0.112668
yqeF	69.6041	1.33599	2.52448	2.89341e-07	3.92599e-06	0.00122883
yqfA	195.65	1.34301	2.5368	7.46991e-11	1.68748e-09	3.17247e-07
nudG	81.6114	1.34577	2.54165	2.21907e-14	6.92971e-13	9.4244e-11
yfaL	2.66283	1.35069	2.55034	3.58431e-05	0.000292742	0.152226
ycdT	14.4608	1.36005	2.56693	2.86807e-08	4.51136e-07	0.000121807
cspA	15997.9	1.36009	2.56701	9.61457e-13	2.55207e-11	4.08331e-09
fimE	61.9625	1.36225	2.57087	8.27502e-12	1.98554e-10	3.5144e-08
gdhA	76.7107	1.36288	2.57198	3.76789e-15	1.23094e-13	1.60022e-11
yfeK	21.5579	1.38287	2.60786	4.40775e-06	4.59943e-05	0.0187197
yphE	4.82502	1.38696	2.61527	3.62742e-05	0.000295694	0.154057
yafV	82.646	1.38907	2.6191	4.33107e-08	6.68874e-07	0.00018394
oxc	2.79884	1.40516	2.64846	0.000322347	0.00204025	1
aslA	8.00993	1.40645	2.65084	6.06767e-06	6.09205e-05	0.0257694
cpxP	192.201	1.40864	2.65486	4.86476e-16	1.69349e-14	2.06606e-12
yihO	4.24966	1.43897	2.71127	7.38583e-05	0.000557152	0.313676
sdhC	271.732	1.44125	2.71557	3.3598e-10	6.92673e-09	1.42691e-06
ygaY	16.6627	1.44141	2.71587	8.57482e-11	1.89783e-09	3.64172e-07
thiH	10.8844	1.44661	2.72568	7.29129e-07	9.24362e-06	0.00309661
sdhD	149.586	1.4612	2.75338	5.00777e-05	0.00039631	0.21268
kbaY	7.279	1.49029	2.80945	0.000208972	0.00138025	0.887503
betT	19.8781	1.50347	2.83524	1.58853e-12	4.19035e-11	6.74647e-09
ycgZ	16.9918	1.5098	2.8477	0.000524207	0.00310071	1
livF	9.08097	1.53677	2.90145	8.41506e-05	0.000625898	0.357388
alx	26.9197	1.55156	2.93135	1.49122e-15	4.98678e-14	6.33321e-12
deaD	1429.9	1.55227	2.93279	3.98655e-12	1.00183e-10	1.69309e-08
csiR	15.4179	1.55319	2.93465	1.97016e-06	2.27371e-05	0.00836725
ybcM	43.841	1.56164	2.9519	2.82869e-18	1.03564e-16	1.20134e-14
fadB	9.07836	1.56307	2.95482	1.01141e-11	2.41318e-10	4.29547e-08
yjfK	5.38145	1.56911	2.96721	0.000563463	0.00330073	1
thiM	23.3226	1.57498	2.97931	2.97817e-09	5.38225e-08	1.26483e-05
hofB	5.8277	1.57712	2.98373	6.19873e-06	6.19436e-05	0.026326
iscR	390.053	1.58676	3.00374	1.99636e-16	7.00706e-15	8.47855e-13
ybcL	79.2903	1.59721	3.02558	1.76418e-12	4.62498e-11	7.49247e-09
ydhS	7.52285	1.61495	3.06301	8.787e-08	1.29129e-06	0.000373184
yraQ	12.9472	1.61944	3.07256	1.02796e-07	1.50026e-06	0.000436576
csgG	10.4868	1.63556	3.10708	2.01106e-07	2.78208e-06	0.000854099
eutB	5.62853	1.64274	3.12258	5.51648e-06	5.61834e-05	0.0234285
yqiK	10.4173	1.67484	3.19283	5.09363e-10	1.03506e-08	2.16327e-06
ttdT	11.3344	1.68064	3.20571	5.57288e-09	9.86167e-08	2.3668e-05
dkgB	18.9675	1.68355	3.21218	1.23152e-08	2.04308e-07	5.23028e-05
ydcI	17.2042	1.68538	3.21626	1.83009e-08	3.00092e-07	7.77238e-05
yhdY	8.28544	1.69212	3.2313	6.44569e-08	9.67309e-07	0.000273748
fadH	13.5732	1.69734	3.24302	9.22618e-13	2.46438e-11	3.91836e-09
yfcV	11.5007	1.7034	3.25667	4.02918e-05	0.000324705	0.171119
yafE	19.54	1.71691	3.28732	2.36479e-09	4.42435e-08	1.00433e-05
lgoD	4.41584	1.72179	3.29846	0.000435761	0.0026514	1
fadE	13.4246	1.72694	3.31026	1.23916e-15	4.21016e-14	5.2627e-12
leuB	13.0487	1.73044	3.31828	9.37783e-09	1.59311e-07	3.98277e-05
yhjE	10.981	1.73354	3.32542	8.04373e-09	1.38869e-07	3.41617e-05
ydhP	15.0062	1.73734	3.3342	7.02024e-11	1.59438e-09	2.98149e-07
argT	21.1769	1.73876	3.33749	1.00609e-09	1.96906e-08	4.27285e-06
yncD	15.4714	1.74282	3.3469	1.71672e-20	6.87821e-19	7.29091e-17
napD	20.8072	1.74526	3.35255	5.8738e-06	5.93121e-05	0.024946
yhhQ	56.7625	1.77663	3.42626	1.70453e-15	5.65557e-14	7.23914e-12
lldP	15.7038	1.79243	3.46397	9.53108e-19	3.58217e-17	4.04785e-15
cvrA	104.786	1.79378	3.46722	2.36826e-39	1.57156e-37	1.0058e-35
yceJ	6.86542	1.79494	3.47	9.17035e-05	0.000676154	0.389465
garL	34.7036	1.79554	3.47145	3.90139e-15	1.26143e-13	1.65692e-11
eutC	7.62116	1.80251	3.48827	8.86821e-06	8.48273e-05	0.0376633
ugpA	3.38882	1.85388	3.61472	0.000735361	0.00415701	1
ygcG	5.59383	1.85691	3.6223	7.87688e-06	7.60298e-05	0.0334531
fruK	14.6772	1.85762	3.62408	1.93853e-09	3.64289e-08	8.23294e-06
yjcB	39.9822	1.8654	3.64369	1.38401e-06	1.64647e-05	0.0058779
yhdZ	12.1889	1.87241	3.66143	8.40651e-08	1.23967e-06	0.000357024
metA	21.0514	1.89923	3.73013	2.13245e-13	6.03768e-12	9.05653e-10
dppD	11.4552	1.89997	3.73205	2.2891e-07	3.14622e-06	0.000972181
csiD	7.99128	1.90378	3.74193	1.38363e-06	1.64647e-05	0.00587629
ycfJ	58.0317	1.91539	3.77216	1.98806e-14	6.25428e-13	8.44328e-11
ydcX	29.3104	1.91742	3.77746	7.56812e-06	7.37197e-05	0.0321418
atoD	4.71128	1.91911	3.78188	0.000426656	0.00260346	1
yphD	2.84264	1.91972	3.7835	0.000857297	0.00474081	1
flhC	389.777	1.9325	3.81717	1.90793e-21	7.79134e-20	8.103e-18
kgtP	28.3697	1.93357	3.81998	4.01469e-25	1.98261e-23	1.70504e-21
yaaU	3.67752	1.93842	3.83285	1.98067e-05	0.000173442	0.0841191
fruA	16.0251	1.96327	3.89946	1.45812e-21	6.01226e-20	6.19262e-18
yfdV	6.81661	1.9644	3.9025	1.26123e-06	1.52605e-05	0.00535643
sbmA	49.4175	1.98045	3.94617	2.11468e-23	9.8693e-22	8.98107e-20
yohF	4.51767	2.04147	4.11666	0.000199689	0.00133346	0.848078
flhD	451.805	2.06098	4.17269	7.23728e-22	3.04324e-20	3.07367e-18
hofC	7.30186	2.06382	4.18092	2.34789e-08	3.74867e-07	9.97147e-05
ppdD	9.34086	2.07274	4.20686	2.47991e-05	0.000212554	0.105322
ymdB	43.0227	2.11513	4.3323	1.40655e-15	4.74096e-14	5.97361e-12
mdtJ	39.5732	2.14057	4.40938	4.65213e-11	1.07378e-09	1.97576e-07
proP	279.336	2.17119	4.50396	7.09968e-23	3.2077e-21	3.01524e-19
mntP	125.634	2.18167	4.53677	2.77813e-18	1.02598e-16	1.17987e-14
fruB	28.7572	2.18636	4.55156	1.69204e-19	6.59276e-18	7.18611e-16
lpxP	103.18	2.21785	4.652	1.60798e-22	7.11362e-21	6.82907e-19
ybaA	29.8334	2.38562	5.22567	1.88437e-10	4.00146e-09	8.00291e-07
fadI	28.9346	2.4009	5.28133	9.6718e-27	5.07113e-25	4.10761e-23
nadA	110.671	2.40888	5.31061	2.45927e-33	1.5137e-31	1.04445e-29
ygfS	16.4091	2.43856	5.42102	5.19648e-08	7.93865e-07	0.000220694
yjaB	24.4026	2.53341	5.7894	8.57976e-11	1.89783e-09	3.64383e-07
entD	4.04943	2.58345	5.9937	0.000104052	0.000755397	0.441908
rutF	5.93347	2.66651	6.34892	6.67703e-05	0.000508197	0.283574
mdtI	28.8185	2.67331	6.37892	4.5233e-12	1.12342e-10	1.92104e-08
phnE	6.47419	2.7495	6.72485	4.59431e-07	6.04088e-06	0.00195121
astE	4.48498	2.82613	7.09169	1.08618e-06	1.33324e-05	0.00461301
cspG	496.02	3.12073	8.69828	3.58106e-41	2.45302e-39	1.52087e-37
flgA	75.5211	3.16412	8.96384	2.91021e-37	1.87268e-35	1.23597e-33
ves	39.6437	3.20531	9.22349	2.5091e-24	1.21093e-22	1.06562e-20
flhB	94.9423	3.391	10.4904	4.35719e-52	3.24649e-50	1.8505e-48
flgG	947.467	3.72817	13.2523	6.87422e-75	7.2987e-73	2.91948e-71
flgC	1198.53	3.75173	13.4705	6.70282e-75	7.2987e-73	2.84669e-71
flgB	1155.69	3.75179	13.4711	8.28324e-78	9.50782e-76	3.51789e-74
flgH	361.733	3.78461	13.781	2.14293e-74	2.21977e-72	9.10104e-71
flgF	858.014	3.81485	14.0729	1.46536e-85	2.00754e-83	6.22337e-82
flgI	291.815	3.82519	14.1742	2.24903e-80	2.72904e-78	9.55163e-77
intD	11.6654	3.85625	14.4826	9.17631e-06	8.75764e-05	0.0389718
flgE	1246.47	3.86499	14.5706	2.52942e-84	3.25529e-82	1.07424e-80
flgD	1291.53	3.88427	14.7667	3.5032e-83	4.37591e-81	1.48781e-79
flgJ	249.082	3.97089	15.6804	1.24644e-95	2.30158e-93	5.29363e-92
ynjH	183.699	4.07664	16.873	7.11612e-44	5.1224e-42	3.02222e-40
yjjZ	43.9097	4.08819	17.0086	4.99028e-14	1.54667e-12	2.11937e-10
uhpT	79.1527	4.33751	20.2173	5.62549e-59	4.26633e-57	2.38915e-55
flgL	999.835	4.47694	22.2686	3.05453e-112	8.10787e-110	1.29726e-108
mhpB	2.53395	4.66837	25.4284	0.00058223	0.00339195	1
ycgR	150.5	4.68638	25.7478	6.12484e-65	5.10043e-63	2.60122e-61
flgK	878.29	4.68835	25.7831	3.42853e-117	1.12007e-114	1.4561e-113
cheZ	489.661	4.94866	30.8812	1.82371e-105	4.07647e-103	7.74529e-102
ymdA	105.193	4.95659	31.0515	8.50331e-32	5.08642e-30	3.61136e-28
flgN	567.379	5.02234	32.4993	2.42438e-110	6.05667e-108	1.02963e-106
cheW	806.332	5.11818	34.7318	2.67869e-101	5.1711e-99	1.13764e-97
cheY	489.732	5.12111	34.8024	3.83153e-95	6.78022e-93	1.62725e-91
cheB	215.495	5.23378	37.6293	1.59421e-146	3.38531e-143	6.77063e-143
aer	332.302	5.46769	44.2526	1.06985e-128	7.57278e-126	4.54367e-125
motB	362.476	5.48843	44.8932	3.84033e-122	1.63099e-119	1.63099e-118
yhjH	840.281	5.49015	44.947	2.71471e-141	3.84313e-138	1.15294e-137
cheR	291.778	5.57605	47.7045	1.20345e-115	3.40736e-113	5.11104e-112
yjcZ	424.417	5.9749	62.8962	7.61342e-105	1.61671e-102	3.23342e-101
Expression levels were shown as relative values with SME98 (-fold change)

## Sheet: Table S4
Table S4. Presence of vafA and vafB on pIncI2_mcr-1 plasmids in public database
Plasmid	Bacterial. spp.	Size (bp)	vafA	Location	vafB	Location	Country	Sample	Host	Year	Accession No.
pEC92	E. coli	61259	Yes	21617..22387	Yes	complement(25598..26173)	ND	ND	ND	ND
pSZ02	E. coli	64964	Yes	22510..23307	Yes	complement(27351..27926)	China	blood	human	2016	KU761326.1
pYUYZV47-MCR	E. coli	61699	Yes	20891..21664	Yes	complement(24854..25429)	China	ND	ND	2021	MW373507.1
pG3216	E. coli	62717	Yes	complement(9088..9861)	Yes	5323..5898	Argentina	rectal swab	human	2016	MF693349.1
pOM97-mcr	E. coli	63722	Yes	20914..21687	Yes	complement(24877..25452)	Oman	blood	human	2016	KY693674.1
pA31-12	E. coli	67134	Yes		Yes	complement(29880..30512)	China	ND	ND	2016	KX034083.1
pMRY15-131_2	E. coli	60722	Yes	21374..22150	Yes	25362..25994	Japan	ND	Cattle	2013	AP017622.1
pMRY15-117_2	E. coli	61223	Yes	21374..22150	Yes	25362..25994	Japan	ND	Cattle	2012	AP017619.1
pMRY16-002_4	E. coli	61805	Yes	21374..22150	Yes	complement(25362..25994)	Japan	ND	Wild boar	2008	AP017614.1
pLWY24J-mcr-1.1	E. coli	62009	Yes	20385..21182	Yes	complement(25438..26013)	China	feces	chicken	2016	MN689940.1
pZE36	E. coli	65846	Yes	24945..25718	Yes	complement(28908..29540)	China	feces	human	2015	KY802014.1
pECJS-61-63	E. coli	63656	Yes	22327..23100	Yes	complement(26290..26865)	China	feces	pig	2015	KX254342.1
pmcr1_IncI2	E. coli	64964	Yes	22510..23307	Yes	complement(27351..27926)	China	blood	human	2022	NZ_KU761326.1
pCPWW7-IncI2	E. coli	63918	Yes	20903..21625	Yes	complement(24867..25442)	Thailand	ND	Wild boar	2017	NZ_CP075719.1
p1106-IncI2	E. coli	60960	Yes	20403..21200	Yes	complement(24390..24965)	China	ND	chicken	2018	NZ_MG825374.1
p2492-4-MCR-1	E. coli	60688	Yes	8080..8877	Yes	complement(12065..12640)	USA	ND	pork	2019	CP044025.1
pCPA1200-IncI2_4	E. coli	60727	Yes	20903..21625	Yes	complement(24867..25442)	Thailand	feces	Wild boar	2019	NZ_JAHKSR010000004.1
p14005RM	E. coli	65458	Yes	22176..22898	Yes	complement(27209..27784)	Brazil	urine	human	2017	NZ_JAAWUF020000023.1
pMcp0221	E. coli	64664	Yes	complement(27519..28346)	Yes	24511..25086	Switzerland	ND	chicken	2017	KY565557.1
pV80	E. coli	60587	Yes	complement(7083..7856)	Yes	3318..3893	Argentina	urine	dog	2018	MH271383.1
pMCR_1410	Kluyvera ascorbata	57059	Yes	13508..14254	Yes	complement(17119..17694)	China	ND	sewage	2016	KU922754.1
pESTMCR	E. coli	33311	Yes	29858..30604	Yes	20483..21055	Estonia	ND	Wild boar	2016	KU743383.1
pN17-0346	Salmonella enterica subsp. enterica serovar 4,12:i:-	34092	Yes	complement(3130..3876)	Yes	complement(12675..13247)	Switzerland	blood	human	2017	CP031291.1
pMCR-1.2-IT-Ec	E. coli	33293	Yes	29300..30046	Yes	19930..20502	Italy	blood	human	2017	MF093645.1
pMCR_WCHEC1622	E. coli	49897	Yes	complement(46221..46967)	No	-	China	ND	sewage	2015	KY463452.1
pK09-20-mcr-1	Klebsiella pneumoniae	61902	Yes	8132..8707	Yes	complement(11734..12669)	China	ND	human	2009	MG747472.1
p979	E. coli	58638	Yes	19832..20605	Yes	complement(23795..24370)	Argentina	urine	human	2017	MG598816.1
These plasmids were dowloaded from NCBI database. ND, no data

## Sheet: Table S5
Table S5. RNA-Seq and comparison of transcriptional changed by acquisition of chromosome- or plasmid-mediated colistin resistance determinants in E. coli ST131
Genes	Synonymous	Region	Chromosomal-mediated colistin resistance																		Plasmid-mediated colistin resistance																		mcr-deletion plasmid-mediated
			SME98PORTpmrA105						SME98PORTpmrB34						SME98PORTpmrB206						SME98/pIncI2_mcr-1						SME98/pIncP1_mcr-3						SME98/pIncFII_mcr-5						SME98/pIncI2_Δmcr-1						SME98/pIncP1_Δmcr-3
			Max group mean	Log₂ fold change	Fold change	p-value	FDR p-value		Max group mean	Log₂ fold change	Fold change	p-value	FDR p-value		Max group mean	Log₂ fold change	Fold change	p-value	FDR p-value		Max group mean	Log₂ fold change	Fold change	p-value	FDR p-value		Max group mean	Log₂ fold change	Fold change	p-value	FDR p-value		Max group mean	Log₂ fold change	Fold change	p-value	FDR p-value		Max group mean	Log₂ fold change	Fold change	p-value	FDR p-value		Max group mean	Log₂ fold change	Fold change	p-value	FDR p-value
LOCUS_r00010		308..1839	0.1316	4.27996	19.4266	0.16128	0.9999		0.292706	5.38348	41.7435	0.0776805	ND		0.932782	6.98549	126.719	0.0214247	0.74018		0.422872	5.79499	55.522	0.0461438	0.305101		0.266067	5.27223	38.6454	0.0824037	ND		6.25072	9.73932	854.726	0.00139196	0.143659		7.05235	9.71576	840.883	0.0012948	0.0116144		0.396394	5.79377	55.475	0.0475276	0.588823
LOCUS_t00010		1926..2001	1.07075	-3.1843	-9.09014	0.304675	0.9999		1.07075	-3.18108	-9.06984	0.299733	ND		1.07075	-0.837936	-1.78749	0.613403	ND		1.07075	-1.0724	-2.10293	0.531233	0.808329		1.07075	-3.28911	-9.77507	0.283369	ND		1.07075	-3.31321	-9.93974	0.279662	ND		1.07075	-1.13724	-2.1996	0.507301	0.687343		1.07075	-3.30704	-9.89736	0.288265	ND
LOCUS_r00020		2196..5087	4.80568	-1.14761	-2.21547	0.0256394	0.9999		5.9648	0.390454	1.31081	0.505917	0.99997		84.662	3.99831	15.9812	4.29423e-06	0.000507658		6.59063	0.252523	1.19129	0.527178	0.806433		4.80568	-0.641538	-1.55999	0.115731	0.927511		194.695	5.23199	37.5825	3.56527e-09	5.07765e-06		225.677	5.2408	37.8127	1.06248e-08	4.58787e-07		4.81553	-0.116659	-1.08422	0.781798	0.981364
LOCUS_r00030		5193..5302	0	ND	ND	ND	ND		0	ND	ND	ND	ND		0	ND	ND	ND	ND		0.369472	2.09385	4.26885	0.512434	0.797396		0	ND	ND	ND	ND		0	ND	ND	ND	ND		0	ND	ND	ND	ND		0	ND	ND	ND	ND
LOCUS_00010		complement(5409..6500)	23.1317	0.0333802	1.02341	0.941096	0.9999		22.7673	0.0431275	1.03035	0.92227	0.99997		22.0068	-0.160681	-1.11781	0.735601	0.999997		29.4427	0.205355	1.15297	0.550197	0.817332		24.5525	0.0481462	1.03394	0.897803	0.990545		27.9554	0.198812	1.14775	0.601552	0.991074		39.2129	0.518431	1.4324	0.111579	0.274477		26.5736	0.148263	1.10823	0.679753	0.965423
LOCUS_00020		6653..6838	272.268	-0.102148	-1.07337	0.82845	0.9999		272.268	-0.0977537	-1.07011	0.836697	0.99997		272.268	-0.114527	-1.08262	0.80864	0.999997		272.268	-0.725435	-1.6534	0.0585558	0.338803		272.268	-0.448361	-1.36449	0.237515	0.989854		272.268	-0.432943	-1.34998	0.303186	0.991074		272.268	-0.840032	-1.79009	0.0176631	0.080983		272.268	-0.454921	-1.37071	0.19269	0.863414
srkA		6915..7886	191.379	0.135013	1.0981	0.753218	0.9999		190.677	0.141063	1.10272	0.744131	0.99997		195.94	0.173395	1.12771	0.695594	0.999997		241.19	0.292018	1.22435	0.422349	0.746496		228.543	0.324921	1.2526	0.339337	0.989854		242.764	0.37729	1.2989	0.308573	0.991074		222.538	0.0779116	1.05549	0.838931	0.917301		230.358	0.317313	1.24601	0.359002	0.941141
LOCUS_00040		7917..8111	401.383	0.0376291	1.02643	0.931404	0.9999		393.332	-0.00265858	-1.00184	0.995161	0.99997		496.702	0.353712	1.27784	0.410551	0.999997		386.478	-0.409359	-1.3281	0.303354	0.661801		386.478	-0.206168	-1.15362	0.592216	0.990494		386.478	-0.321054	-1.24924	0.365402	0.991074		386.478	-0.593612	-1.50902	0.0410388	0.145685		386.478	-0.308122	-1.23809	0.47773	0.955457
LOCUS_00050		8357..8548	342.223	0.100195	1.07192	0.846416	0.9999		318.004	-0.0515284	-1.03636	0.919521	0.99997		379.076	0.256919	1.19492	0.583828	0.999997		318.004	-0.420289	-1.3382	0.223034	0.590635		318.004	-0.190346	-1.14104	0.621212	0.990545		318.004	-0.330548	-1.25749	0.300148	0.991074		318.004	-0.547338	-1.46139	0.14648	0.326248		318.004	-0.241029	-1.18184	0.534213	0.958158
LOCUS_00060		8649..8822	11.1936	-0.226085	-1.16966	0.733528	0.9999		11.1936	-0.64899	-1.56807	0.382472	0.99997		11.1936	-0.068417	-1.04857	0.924175	0.999997		11.875	-0.115178	-1.08311	0.807773	0.937473		12.1349	0.0276164	1.01933	0.954993	0.994906		13.8318	0.172144	1.12673	0.713398	0.991074		14.3564	0.0677027	1.04805	0.889091	0.942355		11.3947	-0.0693039	-1.04921	0.900402	0.993691
LOCUS_00070		8896..9555	13.0536	0.00627631	1.00436	0.992753	0.9999		13.0777	0.0301475	1.02112	0.96639	0.99997		14.1835	0.150232	1.10975	0.816955	0.999997		19.0781	0.430378	1.34759	0.347706	0.692501		19.1441	0.552033	1.46615	0.226932	0.989854		20.858	0.63751	1.55564	0.160257	0.991074		22.0739	0.54468	1.4587	0.198035	0.391511		19.0086	0.516857	1.43083	0.282083	0.920983
LOCUS_00080		9552..10118	21.5227	-0.0161184	-1.01124	0.982066	0.9999		23.8363	0.175932	1.12969	0.802616	0.99997		24.4313	0.187524	1.13881	0.795106	0.999997		31.8497	0.453953	1.36979	0.382685	0.719417		33.3029	0.63492	1.55285	0.219989	0.987722		41.4134	0.916427	1.88744	0.0804343	0.991074		35.532	0.515069	1.42906	0.331509	0.531068		33.4032	0.613383	1.52984	0.273135	0.917771
yihG		complement(10194..10904)	72.781	-0.238593	-1.17984	0.576235	0.9999		72.781	-0.169841	-1.12493	0.70614	0.99997		72.781	-0.240839	-1.18168	0.571764	0.999997		72.781	-0.389477	-1.30992	0.252878	0.621818		72.781	-0.1154	-1.08328	0.711944	0.990545		87.4285	0.121282	1.0877	0.697859	0.991074		72.781	-0.342699	-1.26813	0.326918	0.527918		80.6024	0.0246101	1.0172	0.941533	0.995228
LOCUS_00100		10935..11153	21.5049	0.115774	1.08356	0.834011	0.9999		21.9017	0.141371	1.10295	0.802583	0.99997		19.613	-0.100502	-1.07215	0.851453	0.999997		19.613	-0.365357	-1.2882	0.315759	0.67123		22.2632	0.0697857	1.04956	0.857275	0.990545		26.3282	0.27358	1.2088	0.516479	0.991074		22.0312	-0.153554	-1.11231	0.662456	0.799866		23.6562	0.137775	1.10021	0.739112	0.968441
LOCUS_00110		11691..12197	136.531	-0.13392	-1.09727	0.778322	0.9999		136.531	-0.142319	-1.10368	0.769227	0.99997		136.531	-0.0971924	-1.06969	0.838292	0.999997		136.531	-0.646992	-1.5659	0.0796706	0.396021		136.531	-0.350596	-1.27509	0.366398	0.989854		136.531	-0.285047	-1.21845	0.352241	0.991074		136.531	-0.88706	-1.8494	0.0143151	0.0699554		136.531	-0.463281	-1.37867	0.250607	0.90293
LOCUS_00120		12109..12420	93.1639	-0.0443311	-1.0312	0.922787	0.9999		97.3048	0.0535068	1.03778	0.914133	0.99997		96.7322	0.060749	1.04301	0.894407	0.999997		93.1639	-0.476048	-1.39093	0.211814	0.579605		93.1639	-0.145475	-1.1061	0.696113	0.990545		95.4143	-0.127913	-1.09271	0.736568	0.991074		93.1639	-0.607246	-1.52335	0.137826	0.314073		93.1639	-0.250664	-1.18975	0.456793	0.955457
LOCUS_00130		12395..12889	165.548	-0.174325	-1.12844	0.661083	0.9999		165.548	-0.0558108	-1.03944	0.890121	0.99997		165.548	-0.176006	-1.12975	0.674958	0.999997		165.548	-0.6448	-1.56352	0.0859003	0.404361		165.548	-0.386341	-1.30707	0.273441	0.989854		165.548	-0.25773	-1.1956	0.496077	0.991074		165.548	-0.813312	-1.75724	0.00167513	0.0141158		165.548	-0.358827	-1.28238	0.344096	0.937303
LOCUS_00140		12952..13233	151.999	-0.250531	-1.18965	0.576173	0.9999		151.999	-0.120026	-1.08675	0.789141	0.99997		151.999	-0.216617	-1.16201	0.619559	0.999997		151.999	-0.512257	-1.42628	0.158233	0.51346		151.999	-0.300306	-1.23141	0.338763	0.989854		151.999	-0.226597	-1.17007	0.520139	0.991074		151.999	-0.805859	-1.74819	0.00591755	0.0373167		151.999	-0.448129	-1.36427	0.137923	0.831876
LOCUS_00150		13302..13727	125.918	-0.0851909	-1.06083	0.832449	0.9999		125.918	-0.0662708	-1.04701	0.882237	0.99997		125.918	-0.154397	-1.11296	0.727688	0.999997		125.918	-0.475924	-1.39081	0.160373	0.51682		125.918	-0.305719	-1.23603	0.336867	0.989854		125.918	-0.197056	-1.14636	0.547257	0.991074		125.918	-0.636372	-1.55442	0.0619882	0.189346		125.918	-0.381468	-1.30267	0.226711	0.899652
LOCUS_00160		13655..14221	119.291	-0.106252	-1.07643	0.827701	0.9999		119.291	-0.137149	-1.09973	0.784316	0.99997		119.291	-0.181616	-1.13415	0.706774	0.999997		119.291	-0.53046	-1.44439	0.143353	0.495021		119.291	-0.27624	-1.21103	0.478622	0.989854		119.291	-0.194472	-1.14431	0.534317	0.991074		119.291	-0.6115	-1.52785	0.0414971	0.146327		119.291	-0.375461	-1.29725	0.355516	0.937916
LOCUS_00170		complement(14598..14885)	202.499	-0.0792256	-1.05645	0.869039	0.9999		202.499	-0.0497289	-1.03507	0.920472	0.99997		211.112	0.0658061	1.04667	0.895796	0.999997		202.499	-0.277165	-1.21181	0.374147	0.711951		202.828	-0.114681	-1.08274	0.758217	0.990545		203.679	-0.145038	-1.10576	0.620608	0.991074		218.045	-0.217798	-1.16296	0.503854	0.684132		202.499	-0.197839	-1.14698	0.559642	0.960549
LOCUS_00180		complement(14885..15022)	76.2771	-0.0302748	-1.02121	0.952912	0.9999		76.2771	-0.0287405	-1.02012	0.955624	0.99997		76.2771	-0.0278422	-1.01949	0.953647	0.999997		76.2771	-0.258423	-1.19617	0.510737	0.797396		76.2771	-0.133951	-1.09729	0.739377	0.990545		76.8829	-0.141838	-1.10331	0.74619	0.991074		76.2771	-0.347877	-1.27269	0.332077	0.531866		76.2771	-0.285158	-1.21854	0.518371	0.955457
LOCUS_00190		15807..16037	296.941	-0.158355	-1.11601	0.769929	0.9999		296.941	-0.0729332	-1.05185	0.879348	0.99997		296.941	-0.0392925	-1.02761	0.936564	0.999997		296.941	-0.876153	-1.83547	0.0123134	0.151913		296.941	-0.504653	-1.41878	0.200926	0.987722		296.941	-0.50491	-1.41904	0.120853	0.991074		296.941	-1.11689	-2.16878	0.00421677	0.0286733		296.941	-0.633646	-1.55148	0.107464	0.773228
LOCUS_00200		16024..16314	299.556	-0.211469	-1.15787	0.639137	0.9999		299.556	-0.134748	-1.0979	0.778165	0.99997		299.556	-0.135568	-1.09853	0.759363	0.999997		299.556	-0.876964	-1.83651	0.0286902	0.237737		299.556	-0.499529	-1.41375	0.190509	0.980982		299.556	-0.612761	-1.52918	0.0918848	0.991074		299.556	-1.00404	-2.00561	0.000762555	0.00760863		299.556	-0.705851	-1.63111	0.1005	0.757873
hemN		16634..17875	209.164	-0.0373868	-1.02625	0.933015	0.9999		209.164	-0.0316729	-1.0222	0.939168	0.99997		209.164	-0.020262	-1.01414	0.965208	0.999997		209.164	-0.320963	-1.24916	0.340383	0.685426		209.164	-0.204179	-1.15203	0.527914	0.989854		218.184	-0.110683	-1.07974	0.779656	0.991877		209.164	-0.344226	-1.26947	0.336596	0.535624		209.164	-0.237011	-1.17855	0.465611	0.955457
LOCUS_00220		complement(18330..18725)	118.292	0.393196	1.3133	0.369669	0.9999		107.532	0.261931	1.19908	0.526537	0.99997		118.811	0.401911	1.32126	0.34099	0.999997		142.779	0.465264	1.38057	0.175365	0.53378		141.545	0.563652	1.47801	0.107282	0.926784		126.96	0.367405	1.29003	0.324494	0.991074		139.351	0.335301	1.26164	0.332999	0.532784		153.514	0.660163	1.58026	0.0364786	0.529344
LOCUS_00230		complement(18734..19747)	168.124	0.276433	1.2112	0.53518	0.9999		162.85	0.241126	1.18191	0.587642	0.99997		165.594	0.250646	1.18974	0.581788	0.999997		201.789	0.337912	1.26393	0.347973	0.692681		205.618	0.472473	1.38749	0.157812	0.952683		195.232	0.360348	1.28374	0.310992	0.991074		188.554	0.140942	1.10262	0.679839	0.812292		233.034	0.636163	1.55419	0.0594886	0.6478
LOCUS_00240		complement(19750..20292)	202.616	0.274387	1.20948	0.537682	0.9999		186.923	0.16615	1.12206	0.688854	0.99997		180.416	0.112685	1.08124	0.780679	0.999997		245.368	0.348047	1.27284	0.230532	0.59963		236.357	0.401958	1.3213	0.133027	0.937841		220.384	0.261551	1.19877	0.317006	0.991074		210.281	0.0253389	1.01772	0.926886	0.963133		276.992	0.612493	1.5289	0.048318	0.589827
LOCUS_00250		complement(20289..20798)	204.36	0.281242	1.21524	0.463851	0.9999		182.992	0.13893	1.10109	0.739417	0.99997		183.546	0.117559	1.0849	0.767893	0.999997		192.889	-0.00395386	-1.00274	0.991346	0.996826		190.299	0.082195	1.05863	0.745947	0.990545		214.693	0.217506	1.16272	0.487007	0.991074		191.32	-0.117656	-1.08497	0.739503	0.853806		236.424	0.377305	1.29891	0.159834	0.843385
LOCUS_00260		complement(20971..21564)	1099.74	0.269886	1.20571	0.598175	0.9999		987.419	0.111364	1.08025	0.815533	0.99997		977.971	0.103842	1.07463	0.844751	0.999997		906.104	-0.438499	-1.35519	0.262349	0.627535		906.104	-0.400149	-1.31964	0.291953	0.989854		906.104	-0.20911	-1.15598	0.631857	0.991074		906.104	-0.622903	-1.53997	0.128453	0.300233		906.104	-0.230526	-1.17326	0.535498	0.958158
LOCUS_00270		complement(21474..22379)	1735.13	0.211184	1.15764	0.67208	0.9999		1641.71	0.12407	1.08981	0.791535	0.99997		1512.24	0.00675181	1.00469	0.989325	0.999997		1491.49	-0.64956	-1.56869	0.0852313	0.402979		1491.49	-0.60645	-1.52251	0.0975229	0.909579		1491.49	-0.451592	-1.36755	0.37597	0.991074		1491.49	-0.838264	-1.7879	0.0975304	0.251862		1491.49	-0.382073	-1.30321	0.268859	0.917771
LOCUS_00280		22749..23111	2103.2	-0.164883	-1.12108	0.711228	0.9999		2103.2	-0.0428607	-1.03015	0.917818	0.99997		2103.2	-0.0509873	-1.03597	0.919435	0.999997		2103.2	-0.478564	-1.39336	0.203007	0.568747		2103.2	-0.286636	-1.21979	0.44086	0.989854		2103.2	-0.313993	-1.24314	0.481419	0.991074		2103.2	-0.682832	-1.60529	0.138262	0.314504		2103.2	-0.300241	-1.23135	0.399273	0.948039
typA		23168..24571	2146.93	-0.139502	-1.10152	0.74832	0.9999		2146.93	-0.0460366	-1.03242	0.905174	0.99997		2146.93	-0.0115582	-1.00804	0.98098	0.999997		2146.93	-0.315433	-1.24439	0.274031	0.634839		2146.93	-0.218721	-1.1637	0.468638	0.989854		2146.93	-0.272155	-1.20761	0.545358	0.991074		2164.26	-0.32763	-1.25495	0.523032	0.698875		2146.93	-0.285871	-1.21915	0.29886	0.921074
LOCUS_00300		complement(24721..25461)	70.0723	0.0876432	1.06263	0.825551	0.9999		65.9737	0.0101717	1.00708	0.981197	0.99997		69.1215	0.090024	1.06439	0.838597	0.999997		72.4213	-0.0716949	-1.05095	0.821163	0.942986		65.0801	-0.117392	-1.08477	0.735276	0.990545		74.9995	0.0503157	1.03549	0.883012	0.99192		66.6502	-0.290682	-1.22322	0.391017	0.585768		72.2118	0.0144359	1.01006	0.963005	0.997442
LOCUS_00310		complement(25577..25933)	16.1191	0.193433	1.14348	0.73727	0.9999		17.1863	0.31497	1.24399	0.585022	0.99997		14.7848	0.103936	1.0747	0.855919	0.999997		19.0515	0.25477	1.19315	0.533073	0.80881		20.5949	0.471751	1.38679	0.231951	0.989854		15.6745	0.0415528	1.02922	0.918588	0.994458		20.6278	0.2652	1.2018	0.448274	0.635415		16.5524	0.137406	1.09993	0.73672	0.968441
LOCUS_00320		complement(25948..26445)	13.0964	-0.425532	-1.34307	0.445666	0.9999		13.0964	-0.0877276	-1.0627	0.874788	0.99997		13.0964	-0.362874	-1.28598	0.508588	0.999997		13.0964	-0.41432	-1.33267	0.30233	0.660321		13.0964	-0.230619	-1.17334	0.550252	0.989854		14.6419	0.0108971	1.00758	0.977477	0.997314		13.0964	-0.548018	-1.46208	0.121431	0.289002		13.0964	-0.226323	-1.16985	0.568598	0.960549
LOCUS_00330		26835..27239	1.70438	0.260949	1.19827	0.727916	0.9999		1.39633	-0.23225	-1.17467	0.773713	ND		1.61531	0.14898	1.10878	0.852576	0.999997		1.39633	-0.484856	-1.39945	0.507945	0.797396		1.39633	-0.622741	-1.5398	0.415294	0.989854		2.0431	0.387597	1.30821	0.559196	0.991074		1.74411	-0.0545659	-1.03855	0.937397	0.968834		1.39633	-0.363281	-1.28635	0.629777	0.964103
LOCUS_00340		27233..27442	1.75092	0.356753	1.28054	0.694053	0.9999		2.31624	0.751851	1.68395	0.358493	ND		2.72974	0.986999	1.98206	0.209314	0.999997		3.28106	1.02715	2.03799	0.144056	0.495021		2.32173	0.646848	1.56574	0.399109	0.989854		1.58009	0.0676327	1.048	0.93083	ND		1.98238	0.214697	1.16046	0.762586	0.869536		3.27726	1.11613	2.16765	0.138384	0.831876
LOCUS_00350		27467..27796	2.70683	0.53066	1.44459	0.463397	0.9999		3.44418	0.884378	1.84597	0.18852	ND		2.23484	0.271531	1.20709	0.712084	0.999997		2.82771	0.383008	1.30406	0.56206	0.824844		2.46403	0.299295	1.23054	0.616539	0.990545		2.1383	0.0595846	1.04217	0.922304	0.994892		2.26954	-0.0255002	-1.01783	0.963184	0.981656		3.31167	0.702848	1.62772	0.206337	0.877284
LOCUS_00360		27799..28131	2.57164	0.302175	1.233	0.689936	0.9999		2.43692	0.226031	1.16961	0.760785	ND		2.09139	0.0119754	1.00834	0.987431	0.999997		3.04308	0.325878	1.25343	0.60837	0.84959		2.07225	-0.111603	-1.08043	0.861343	0.990545		2.74025	0.24875	1.18818	0.687044	0.991074		2.74824	0.0823699	1.05876	0.886914	0.941222		3.03948	0.397662	1.31737	0.52676	0.955982
LOCUS_00370		28128..28352	4.52286	1.28697	2.44016	0.088153	0.9999		2.16337	0.251987	1.19085	0.744108	ND		3.09111	0.762542	1.69648	0.308214	0.999997		2.16037	0.0334695	1.02347	0.960703	0.985928		4.3339	1.13237	2.19219	0.0721107	0.833575		2.21678	0.138616	1.10085	0.849454	0.99192		4.06836	0.83346	1.78195	0.165421	0.351639		4.85656	1.27595	2.42158	0.0408418	0.550665
LOCUS_00380		28385..29395	4.0655	0.523872	1.43781	0.320333	0.9999		3.77793	0.417808	1.3359	0.39547	0.99997		2.95527	0.0719435	1.05113	0.899191	0.999997		5.00947	0.61056	1.52685	0.107705	0.441602		4.09816	0.431249	1.3484	0.2945	0.989854		3.85335	0.305819	1.23612	0.43778	0.991074		6.0474	0.781534	1.71896	0.0415945	0.146434		5.36485	0.799488	1.74048	0.0356614	0.523244
LOCUS_00390		29464..30897	3.99387	0.0057759	1.00401	0.991716	0.9999		4.27883	0.109586	1.07892	0.842343	0.99997		3.93895	0.00118998	1.00083	0.998242	0.999997		7.23248	0.656122	1.57584	0.13235	0.476737		5.55411	0.384871	1.30574	0.345093	0.989854		4.8871	0.163284	1.11983	0.660912	0.991074		6.99282	0.508222	1.4223	0.206283	0.401259		6.18157	0.519914	1.43387	0.223385	0.896501
LOCUS_00400		30996..31316	2.27261	-0.476273	-1.39115	0.510441	0.9999		2.27261	-0.837156	-1.78653	0.261439	ND		2.27261	-1.32008	-2.4968	0.113234	0.999997		2.27261	-0.580236	-1.49509	0.322835	0.674276		2.27261	-0.276878	-1.21157	0.641881	0.990545		2.32583	-0.117755	-1.08504	0.836986	0.99192		2.3352	-0.284168	-1.21771	0.605328	0.756833		2.27261	-0.596174	-1.5117	0.317528	0.927219
LOCUS_00410		31301..31708	2.0838	0.204927	1.15263	0.780664	0.9999		2.1922	0.2807	1.21478	0.684185	ND		1.80473	0.0119592	1.00832	0.986378	0.999997		4.06889	0.953237	1.93621	0.0798985	0.39638		3.68236	0.919785	1.89183	0.0794143	0.85992		2.95456	0.563043	1.47738	0.315084	0.991074		3.9754	0.820737	1.76631	0.127157	0.297934		3.3729	0.773976	1.70998	0.146899	0.834482
LOCUS_00420		31705..32199	2.53354	0.0391563	1.02751	0.954158	0.9999		3.44769	0.525339	1.43927	0.407025	0.99997		2.97412	0.317974	1.24658	0.632179	0.999997		2.70018	-0.038281	-1.02689	0.940241	0.980616		3.85809	0.582518	1.49746	0.256769	0.989854		2.43527	-0.117402	-1.08478	0.825575	0.99192		4.03386	0.438136	1.35485	0.338557	0.537492		2.69863	0.0507168	1.03578	0.925731	0.994151
LOCUS_00430		32331..32753	7.94676	-0.299792	-1.23097	0.585986	0.9999		7.94676	-0.131923	-1.09575	0.78911	0.99997		7.94676	-0.191383	-1.14186	0.713902	0.999997		8.04009	-0.206379	-1.15379	0.603851	0.847899		7.94676	-0.313934	-1.24309	0.444938	0.989854		8.42039	-0.0667498	-1.04735	0.856776	0.99192		7.94676	-0.392041	-1.31225	0.268799	0.46894		7.94676	-0.187406	-1.13871	0.669867	0.965182
LOCUS_00440		32847..33215	9.6588	-0.302054	-1.2329	0.579223	0.9999		9.6588	-0.125098	-1.09058	0.785384	0.99997		9.6588	-0.107261	-1.07718	0.824238	0.999997		9.6588	-0.325152	-1.2528	0.403318	0.734029		12.8831	0.300328	1.23142	0.423356	0.989854		11.3316	0.0803693	1.05729	0.838286	0.99192		10.1519	-0.251712	-1.19062	0.474194	0.658772		11.6276	0.133388	1.09687	0.733942	0.968441
LOCUS_00450		33356..33955	36.5697	0.0101313	1.00705	0.984527	0.9999		35.8375	-0.142458	-1.10378	0.755015	0.99997		36.8581	0.0561589	1.03969	0.906949	0.999997		35.8375	-0.335078	-1.26145	0.382419	0.719362		35.8375	-0.26298	-1.19995	0.459871	0.989854		35.8375	-0.280008	-1.2142	0.382193	0.991074		35.8375	-0.464533	-1.37987	0.127827	0.299045		36.3624	-0.115388	-1.08327	0.757271	0.971779
yihY		33949..34821	26.0067	0.0565756	1.03999	0.906569	0.9999		24.6824	-0.145914	-1.10643	0.748619	0.99997		25.8863	0.0679545	1.04823	0.885322	0.999997		27.7436	-0.0549545	-1.03883	0.869887	0.960864		26.0561	-0.0366606	-1.02574	0.922485	0.991829		26.6291	-0.0423696	-1.0298	0.90786	0.991929		26.6938	-0.210078	-1.15675	0.448707	0.635793		29.4877	0.123096	1.08907	0.757073	0.971779
LOCUS_00470		34818..35171	65.448	0.146203	1.10665	0.770753	0.9999		62.5049	0.0886007	1.06334	0.833367	0.99997		63.8323	0.124432	1.09008	0.800243	0.999997		61.5483	-0.14995	-1.10953	0.688086	0.88803		65.1988	0.0424646	1.02987	0.90965	0.990767		64.8341	-0.00247858	-1.00172	0.994426	0.998625		58.4626	-0.371753	-1.29392	0.214809	0.411664		65.9717	0.0402234	1.02827	0.915271	0.994151
LOCUS_00480		35421..35963	53.8109	-0.1786	-1.13179	0.702057	0.9999		53.8109	-0.157786	-1.11557	0.72454	0.99997		53.8109	-0.207482	-1.15467	0.628408	0.999997		53.8109	-0.399705	-1.31924	0.258581	0.625904		59.7031	0.0420503	1.02958	0.904958	0.990545		60.4222	0.0255906	1.0179	0.942628	0.996072		53.8109	-0.575021	-1.4897	0.167093	0.35357		56.0545	-0.0645093	-1.04573	0.856269	0.993691
LOCUS_00490		35867..36238	45.5503	-0.0566633	-1.04006	0.910051	0.9999		45.5503	-0.237504	-1.17895	0.616134	0.99997		45.5503	-0.0436483	-1.03072	0.931886	0.999997		45.5503	-0.322108	-1.25016	0.366626	0.709321		46.1854	-0.0772614	-1.05501	0.835895	0.990545		48.5032	-0.0427913	-1.0301	0.91137	0.99256		45.5503	-0.443312	-1.35972	0.241152	0.440716		45.5503	-0.131433	-1.09538	0.755869	0.971441
LOCUS_00500		complement(36364..37209)	21.2285	0.194898	1.14464	0.708503	0.9999		20.7435	0.195782	1.14535	0.69801	0.99997		19.7798	0.121	1.08749	0.817312	0.999997		22.4532	0.103847	1.07464	0.775302	0.926174		27.1792	0.488458	1.40294	0.174004	0.970533		25.2424	0.345625	1.2707	0.376505	0.991074		23.5163	0.0735177	1.05228	0.852992	0.924871		26.3144	0.424127	1.34176	0.253807	0.904648
LOCUS_00510		37438..37734	20.8372	-0.218132	-1.16323	0.700439	0.9999		20.8372	-0.0739997	-1.05263	0.895109	0.99997		23.0287	0.135615	1.09856	0.833996	0.999997		20.8372	-0.600948	-1.51671	0.161777	0.519319		20.8372	-0.31256	-1.24191	0.45112	0.989854		21.3372	-0.153228	-1.11206	0.706804	0.991074		20.8372	-0.651795	-1.57112	0.111861	0.27494		23.578	0.0142655	1.00994	0.973513	0.997777
LOCUS_00520		37772..38038	47.5645	-0.0132198	-1.00921	0.980379	0.9999		47.2604	-0.327125	-1.25451	0.53522	0.99997		47.2604	-0.115054	-1.08302	0.829256	0.999997		47.2604	-0.704704	-1.62981	0.111739	0.44586		47.2604	-0.474475	-1.38941	0.290886	0.989854		47.2604	-0.65203	-1.57138	0.15976	0.991074		47.2604	-1.06093	-2.08628	0.00646214	0.0398951		47.2604	-0.30867	-1.23857	0.448708	0.955457
yiiE		39067..39285	0.55236	1.36419	2.57433	0.394982	0.9999		0.185793	-2.33366	-5.04081	0.464406	ND		0.186435	0.00910889	1.00633	0.996076	ND		1.10731	2.09778	4.2805	0.16598	0.523356		0.555981	1.26669	2.40609	0.4138	ND		0.187006	-0.126583	-1.09171	0.944754	ND		1.9019	2.74787	6.71723	0.0514519	0.167339		0.369352	0.712899	1.63909	0.681323	ND
LOCUS_00540		complement(39469..40185)	4.12825	-0.261376	-1.19862	0.673625	0.9999		4.12825	-0.0909975	-1.06511	0.88016	0.99997		4.50775	0.125826	1.09113	0.821543	0.999997		5.8766	0.287119	1.2202	0.474975	0.779295		4.64377	0.0628064	1.0445	0.881258	0.990545		6.93307	0.598711	1.51436	0.13341	0.991074		7.48343	0.540553	1.45453	0.166613	0.352758		4.629	0.0339874	1.02384	0.938881	0.995228
LOCUS_00550		complement(40288..40521)	4.50952	0.160242	1.11747	0.81062	0.9999		4.33454	0.113831	1.0821	0.857786	0.99997		3.97463	-0.519093	-1.43305	0.487678	0.999997		3.97463	-0.353685	-1.27782	0.553282	0.818883		3.97463	-0.261417	-1.19866	0.717196	0.990545		6.9196	0.637237	1.55535	0.263639	0.991074		5.8683	0.231374	1.17395	0.659586	0.79766		3.97463	-0.198396	-1.14742	0.715499	0.966083
LOCUS_00560		complement(40667..40927)	5.28463	-0.342926	-1.26833	0.610215	0.9999		5.28463	-0.755588	-1.68832	0.257912	0.99997		5.28463	-0.426697	-1.34415	0.50992	0.999997		5.58715	-0.140649	-1.1024	0.778132	0.927328		5.28463	-0.287854	-1.22082	0.571782	0.990494		5.28463	-0.875129	-1.83417	0.0964961	0.991074		7.17425	0.11853	1.08563	0.783644	0.88274		5.28463	-0.335672	-1.26197	0.569524	0.960549
LOCUS_00570		41365..41607	7.18307	-0.509248	-1.42331	0.503041	0.9999		7.18307	-0.200895	-1.14941	0.768054	0.99997		7.23454	0.00544414	1.00378	0.993585	0.999997		10.1712	0.315869	1.24476	0.518719	0.80084		7.51387	-0.00212107	-1.00147	0.997048	0.998317		9.59301	0.323985	1.25178	0.546505	0.991074		12.1585	0.467304	1.38252	0.317082	0.517979		7.99249	0.0705071	1.05009	0.903962	0.993691
LOCUS_00580		complement(41781..42395)	141.149	-0.0110736	-1.00771	0.9785	0.9999		142.151	0.00572037	1.00397	0.989326	0.99997		141.597	0.0309963	1.02172	0.942643	0.999997		140.045	-0.574919	-1.48959	0.160039	0.516342		140.045	-0.550034	-1.46412	0.126977	0.931229		140.045	-0.241805	-1.18247	0.51637	0.991074		140.045	-0.560869	-1.47516	0.0910719	0.241102		140.045	-0.354299	-1.27836	0.28628	0.920983
LOCUS_00590		complement(42395..42715)	175.374	-0.0783579	-1.05582	0.859649	0.9999		181.404	0.0358939	1.02519	0.943589	0.99997		175.374	-0.0600677	-1.04251	0.902506	0.999997		175.374	-0.394614	-1.31459	0.240369	0.607482		175.374	-0.438778	-1.35546	0.177806	0.974301		175.374	-0.312339	-1.24172	0.347907	0.991074		175.374	-0.610316	-1.52659	0.108493	0.269662		175.374	-0.257725	-1.19559	0.451671	0.955457
fdoI		complement(42712..43242)	59.5788	0.301946	1.23281	0.504751	0.9999		47.6724	-0.0370097	-1.02599	0.933012	0.99997		53.3813	0.197663	1.14684	0.662533	0.999997		64.3868	0.209938	1.15664	0.534026	0.80881		54.4808	0.0779356	1.05551	0.827077	0.990545		64.4078	0.28218	1.21603	0.439464	0.991074		78.058	0.387897	1.30848	0.228908	0.427843		59.3774	0.182886	1.13515	0.600626	0.962359
fdoH		complement(43343..44158)	42.1578	0.123117	1.08909	0.780113	0.9999		41.1007	0.122499	1.08862	0.800406	0.99997		44.5307	0.28631	1.21952	0.535937	0.999997		54.553	0.315094	1.24409	0.379304	0.716234		39.0199	-0.0644891	-1.04571	0.854825	0.990545		53.8528	0.367902	1.29047	0.216863	0.991074		66.8072	0.507777	1.42186	0.102347	0.25988		48.3632	0.231475	1.17403	0.499628	0.955457
LOCUS_00620		complement(44331..44492)	24.5278	0.312921	1.24222	0.567958	0.9999		22.0329	0.207327	1.15455	0.684299	0.99997		26.7962	0.493358	1.40772	0.36542	0.999997		34.0074	0.613014	1.52945	0.11359	0.449885		18.9815	-0.275066	-1.21005	0.497857	0.989854		22.0189	0.0590435	1.04177	0.885621	0.99192		55.7526	1.21791	2.32609	0.00185224	0.0153045		30.9853	0.556075	1.47026	0.178226	0.859667
LOCUS_00630		complement(44489..45403)	64.1004	0.320824	1.24904	0.447809	0.9999		53.1	0.0994371	1.07136	0.818588	0.99997		67.7863	0.494686	1.40901	0.334838	0.999997		79.1926	0.455761	1.37151	0.186916	0.546973		53.7605	-0.000625028	-1.00043	0.998569	0.999387		80.2749	0.543009	1.45701	0.0673187	0.991074		114.919	0.893069	1.85712	0.00111435	0.0103865		70.1635	0.366578	1.28929	0.282119	0.920983
LOCUS_00640		complement(45364..45903)	66.6958	0.389419	1.30987	0.387508	0.9999		53.6493	0.137898	1.1003	0.766704	0.99997		63.2788	0.414573	1.3329	0.416124	0.999997		69.4493	0.275376	1.21031	0.443264	0.759725		48.4151	-0.203256	-1.15129	0.599831	0.990545		76.5359	0.484838	1.39943	0.107764	0.991074		96.8067	0.653643	1.57314	0.0274744	0.110345		65.7383	0.286408	1.2196	0.491596	0.955457
LOCUS_00650		complement(45900..47303)	91.1599	0.374693	1.29656	0.439002	0.9999		66.5972	0.00568873	1.00395	0.989872	0.99997		82.7177	0.341654	1.26721	0.465007	0.999997		90.5568	0.20205	1.15033	0.543822	0.814667		65.3955	-0.410216	-1.32888	0.211941	0.987722		100.758	0.424603	1.3422	0.169776	0.991074		146.605	0.797344	1.7379	0.0404895	0.144271		93.7615	0.34408	1.26934	0.322686	0.929796
fdhD		47497..48327	31.3261	-0.232125	-1.17456	0.597115	0.9999		31.3261	-0.275377	-1.21031	0.522392	0.99997		31.3261	-0.312643	-1.24198	0.519643	0.999997		31.3261	-0.499574	-1.4138	0.174376	0.532521		31.3261	-0.367581	-1.29019	0.301821	0.989854		32.5053	-0.108746	-1.07829	0.76146	0.991074		31.3261	-0.581367	-1.49627	0.0829329	0.226539		31.3261	-0.260151	-1.1976	0.517553	0.955457
LOCUS_00670		48414..48914	2.83675	-1.35446	-2.55702	0.096626	0.9999		2.83675	-0.858653	-1.81334	0.258209	0.99997		2.83675	-0.984974	-1.97928	0.158531	0.999997		2.83675	-0.307239	-1.23734	0.599442	0.845594		2.83675	-1.00823	-2.01145	0.097127	0.909579		3.14599	0.0466564	1.03287	0.935124	0.996072		3.65508	0.0882204	1.06306	0.858634	0.928617		2.83675	-0.805916	-1.74826	0.233972	0.900717
LOCUS_00680		49375..49836	0.704151	-0.0137014	-1.00954	0.986962	0.9999		0.702779	-2.72837	-6.62706	0.0659008	ND		0.974148	0.45947	1.37504	0.562823	0.999997		1.13893	0.460254	1.37578	0.520973	0.801819		0.702779	-0.510352	-1.4244	0.549875	0.989854		1.34554	0.76821	1.70316	0.2814	0.991074		1.98135	1.147	2.21452	0.0730604	0.210083		0.702779	-0.134266	-1.09753	0.859018	0.993691
LOCUS_00690		49821..50711	0.7754	-0.884979	-1.84674	0.322412	0.9999		0.7754	-0.344288	-1.26952	0.68206	ND		0.7754	-0.197824	-1.14697	0.817013	0.999997		1.77106	1.01714	2.02391	0.120353	0.45747		0.7754	-0.66321	-1.5836	0.384194	0.989854		1.30227	0.638743	1.55697	0.337944	0.991074		2.98845	1.61378	3.06053	0.0014272	0.0125093		1.45357	0.810617	1.75396	0.183178	0.859667
rhaM		complement(50752..51066)	2.83355	0.194856	1.14461	0.778766	0.9999		3.22767	0.386124	1.30688	0.573324	ND		2.44507	-0.0651013	-1.04616	0.927339	0.999997		5.52736	0.944655	1.92473	0.0807481	0.397554		2.44507	-0.267697	-1.20388	0.630121	0.990545		2.50015	-0.117672	-1.08498	0.841337	0.99192		6.20581	1.0115	2.016	0.0598711	0.184777		2.95559	0.138222	1.10055	0.802853	0.984541
rhaD		complement(51076..51900)	2.35534	-0.323458	-1.25133	0.611066	0.9999		2.35534	-0.0664715	-1.04715	0.904417	0.99997		2.35534	-0.213892	-1.15981	0.714009	0.999997		3.88031	0.492353	1.40674	0.227991	0.597004		2.46149	-0.0514974	-1.03634	0.908774	0.990767		2.35534	-0.210906	-1.15742	0.656389	0.991074		6.40265	1.11462	2.16539	0.00278275	0.0210371		2.69813	0.0606585	1.04294	0.894297	0.993691
LOCUS_00720		complement(52181..52414)	0.693769	-1.77963	-3.43338	0.23231	0.9999		1.21652	0.765088	1.69947	0.441138	ND		0.693769	-0.375879	-1.29763	0.758951	0.999997		1.55853	0.898514	1.86414	0.292888	0.65074		1.04068	0.446194	1.36244	0.641922	ND		0.709015	-0.119904	-1.08666	0.911049	ND		2.48846	1.46034	2.75173	0.0702069	0.204728		1.38428	0.822509	1.76848	0.384936	0.948039
LOCUS_00730		52459..52692	0.175244	-0.014176	-1.00987	0.993991	0.9999		1.0438	2.3154	4.97742	0.125149	ND		0.697935	1.71387	3.28039	0.29731	0.999997		0.864954	1.84602	3.59507	0.207519	0.57347		0.347268	0.735717	1.66523	0.651173	ND		0.529526	1.25464	2.38608	0.408827	ND		2.31389	3.11818	8.68291	0.0238738	0.10016		1.72995	2.90063	7.4675	0.0398614	0.543842
LOCUS_00740		complement(52620..53423)	1.66694	0.220938	1.16549	0.726553	0.9999		1.41495	-0.00523921	-1.00364	0.993285	0.99997		1.78088	0.330964	1.25785	0.604891	0.999997		3.07345	0.893093	1.85715	0.0493021	0.312397		2.17187	0.504668	1.4188	0.329975	0.989854		2.16673	0.462996	1.3784	0.389652	0.991074		4.1939	1.23999	2.36196	0.00755898	0.0446126		1.96337	0.339995	1.26575	0.501062	0.955457
rhaB		complement(53420..54889)	0.993075	0.0262125	1.01834	0.968153	0.9999		1.29914	0.417876	1.33596	0.487785	0.99997		0.965409	-0.139118	-1.10123	0.837707	0.999997		1.92816	0.772009	1.70765	0.0771784	0.38946		1.71223	0.713438	1.63971	0.141621	0.948263		1.86652	0.799122	1.74004	0.0999221	0.991074		2.91755	1.28061	2.42942	0.00821229	0.0468757		1.98227	0.901515	1.86803	0.0591155	0.6478
LOCUS_00760		55623..56009	3.45465	-0.249607	-1.18888	0.697382	0.9999		3.45465	-0.460451	-1.37597	0.465546	0.99997		3.45465	-0.222154	-1.16647	0.727215	0.999997		4.71394	0.221543	1.16598	0.658189	0.874077		3.45465	-0.1988	-1.14774	0.69206	0.990545		3.45465	-0.633649	-1.55148	0.232808	0.991074		3.97609	-0.120118	-1.08682	0.810007	0.89775		4.49744	0.245106	1.18518	0.616054	0.962755
rhaR		56111..56887	7.15278	0.0265097	1.01854	0.962651	0.9999		6.9387	-0.174961	-1.12893	0.762041	0.99997		7.8491	0.177266	1.13074	0.750602	0.999997		8.2854	0.0377038	1.02648	0.926948	0.975575		7.58274	0.0166472	1.01161	0.966359	0.995885		8.12475	0.0849745	1.06067	0.838199	0.99192		9.10404	0.0711251	1.05054	0.836736	0.91583		7.81343	0.0403628	1.02837	0.917058	0.994151
LOCUS_00780		complement(56925..57320)	5.54	0.453832	1.36967	0.437389	0.9999		4.61933	0.203328	1.15135	0.734807	0.99997		3.99471	-0.227407	-1.17073	0.734405	0.999997		9.10143	0.962595	1.94881	0.0207454	0.201231		7.17815	0.730983	1.65977	0.106235	0.926784		7.24165	0.713581	1.63987	0.122975	0.991074		8.826	0.818793	1.76393	0.050944	0.166173		6.94944	0.664537	1.58506	0.170064	0.852245
LOCUS_00790		complement(57242..57433)	1.89724	0.153143	1.11199	0.866345	0.9999		1.69321	-0.187954	-1.13915	0.83783	ND		1.70609	0.0123121	1.00857	0.988699	0.999997		3.16671	0.663336	1.58374	0.371394	0.710621		2.1148	0.20366	1.15162	0.806272	0.990545		2.38448	0.329457	1.25654	0.684619	ND		5.62541	1.43877	2.71091	0.0691309	0.202848		2.10774	0.179063	1.13215	0.820103	0.987153
LOCUS_00800		complement(57421..57711)	4.60283	-0.329256	-1.25637	0.621886	0.9999		4.60283	-0.840798	-1.79104	0.223921	0.99997		4.60283	-0.156511	-1.11459	0.81986	0.999997		4.60283	-0.248231	-1.18775	0.661414	0.8752		4.60283	-0.255177	-1.19348	0.646636	0.990545		4.60283	-0.139703	-1.10168	0.807412	0.99192		6.71688	0.248616	1.18807	0.601707	0.753539		4.60283	-0.114544	-1.08263	0.836073	0.991534
LOCUS_00810		58240..58536	119.026	0.336958	1.26309	0.443463	0.9999		105.474	0.210996	1.15749	0.668481	0.99997		146.16	0.747608	1.67901	0.142656	0.999997		133.707	0.319206	1.24764	0.432738	0.751578		89.6229	-0.292207	-1.22451	0.461656	0.989854		118.838	0.20808	1.15515	0.595671	0.991074		171.803	0.578108	1.49289	0.0696681	0.203857		114.762	0.186947	1.13835	0.634455	0.964239
LOCUS_00820		58628..58858	74.2019	0.529444	1.44337	0.325322	0.9999		53.2179	0.0836036	1.05966	0.87693	0.99997		78.0776	0.6971	1.62124	0.246903	0.999997		84.5489	0.515323	1.42931	0.182002	0.542315		49.3754	-0.260074	-1.19754	0.554837	0.989854		74.1549	0.385054	1.30591	0.360375	0.991074		104.158	0.712492	1.63863	0.0822792	0.22557		68.6997	0.303376	1.23403	0.480317	0.955457
LOCUS_00830		59443..59715	9.36284	0.207089	1.15436	0.718649	0.9999		8.03431	-0.00466362	-1.00324	0.993156	0.99997		9.44696	0.234385	1.17641	0.680779	0.999997		10.2306	0.129137	1.09364	0.757044	0.918237		8.33442	-0.0567656	-1.04013	0.89154	0.990545		9.11974	0.034415	1.02414	0.934689	0.996072		13.4122	0.418459	1.3365	0.314393	0.515424		10.9723	0.318947	1.24742	0.443796	0.955457
LOCUS_00840		59703..60092	3.84125	0.0377496	1.02651	0.955656	0.9999		3.74875	0.0351699	1.02468	0.95528	0.99997		4.30189	0.238492	1.17976	0.689646	0.999997		8.82461	1.05041	2.07111	0.0163092	0.173942		6.56638	0.733874	1.6631	0.113985	0.927511		5.75107	0.504377	1.41851	0.291008	0.991074		9.27934	1.02328	2.03253	0.0113271	0.0589332		6.84926	0.775696	1.71202	0.0963205	0.748572
LOCUS_00850		60210..60914	55.6581	0.0786095	1.056	0.851065	0.9999		52.8373	0.0080761	1.00561	0.98307	0.99997		58.5842	0.168689	1.12404	0.69214	0.999997		52.0534	-0.236518	-1.17815	0.530067	0.808025		56.2288	-0.00401978	-1.00279	0.98951	0.997406		59.3886	0.0388374	1.02729	0.897849	0.991929		55.0746	-0.241317	-1.18207	0.388824	0.584192		55.8021	-0.0329126	-1.02308	0.910062	0.994151
cpxA		complement(61084..62457)	185.943	0.188874	1.13987	0.647254	0.9999		173.723	0.0991751	1.07116	0.802103	0.99997		188.912	0.227029	1.17042	0.600882	0.999997		195.672	0.0584598	1.04135	0.858053	0.955506		186.693	0.0972025	1.0697	0.749794	0.990545		193.732	0.117169	1.0846	0.769432	0.991074		196.255	-0.0351221	-1.02464	0.918016	0.958524		198.279	0.169843	1.12494	0.589797	0.960549
LOCUS_00870		complement(62454..63086)	274.994	0.131109	1.09514	0.767083	0.9999		248.738	-0.0135423	-1.00943	0.975568	0.99997		261.315	0.0663125	1.04704	0.882427	0.999997		271.086	-0.103946	-1.07471	0.763969	0.920976		261.793	-0.0462509	-1.03258	0.891704	0.990545		270.342	-0.0362512	-1.02545	0.917933	0.994357		262.744	-0.247924	-1.1875	0.487865	0.671122		274.316	0.0035826	1.00249	0.991685	0.997777
cpxP		63297..63764	1025.35	0.564543	1.47892	0.541691	0.9999		838.47	0.317083	1.24581	0.729919	0.99997		1135.96	0.724646	1.6525	0.444917	0.999997		2050.27	1.49042	2.8097	0.0412929	0.287795		1608.19	1.26133	2.39716	0.0808737	0.867468		1734.13	1.34643	2.54283	0.0749063	0.991074		1785.51	1.19945	2.29652	0.122973	0.291526		1390.09	1.02511	2.03512	0.15075	0.835842
fieF		63944..64909	142.312	0.0911177	1.0652	0.835323	0.9999		133.225	0.00987911	1.00687	0.983238	0.99997		139.613	0.0753817	1.05364	0.875405	0.999997		196.729	0.363602	1.28663	0.290214	0.648525		186.694	0.397995	1.31768	0.236289	0.989854		160.774	0.148476	1.1084	0.668717	0.991074		188.396	0.205441	1.15304	0.524228	0.698875		199.768	0.479348	1.39411	0.185252	0.859667
LOCUS_00900		65026..65295	764.868	0.347094	1.272	0.47957	0.9999		742.548	0.268911	1.2049	0.540231	0.99997		646.976	0.0794864	1.05664	0.86165	0.999997		608.481	-0.315277	-1.24425	0.406105	0.73687		608.481	-0.332444	-1.25914	0.376646	0.989854		608.481	-0.385805	-1.30659	0.324657	0.991074		608.481	-0.608917	-1.52511	0.113947	0.277849		610.98	-0.174392	-1.12849	0.64745	0.965182
LOCUS_00910		65216..65530	1168.8	0.34156	1.26713	0.531248	0.9999		1111.74	0.230826	1.17351	0.64146	0.99997		991.452	0.0839378	1.05991	0.87296	0.999997		942.6	-0.257042	-1.19503	0.452356	0.765588		938.23	-0.329115	-1.25624	0.320417	0.989854		938.23	-0.354718	-1.27874	0.348652	0.991074		938.23	-0.55663	-1.47083	0.148404	0.329246		938.23	-0.220898	-1.16546	0.497498	0.955457
LOCUS_00920		65676..65984	952.883	0.415001	1.3333	0.421146	0.9999		862.401	0.232467	1.17484	0.607759	0.99997		775.44	0.0911691	1.06523	0.844738	0.999997		729.93	-0.258261	-1.19604	0.497003	0.791064		723.378	-0.329493	-1.25657	0.367863	0.989854		723.378	-0.396617	-1.31642	0.322272	0.991074		723.378	-0.534356	-1.4483	0.197244	0.390756		723.378	-0.201087	-1.14956	0.565938	0.960549
LOCUS_00930		66302..67087	23.4628	0.38982	1.31023	0.533406	0.9999		18.1737	0.0589594	1.04171	0.924552	0.99997		19.6527	0.142709	1.10398	0.830509	0.999997		35.907	0.887857	1.85042	0.0500876	0.314088		28.3108	0.656659	1.57643	0.11934	0.927511		30.4278	0.726549	1.65468	0.0924968	0.991074		43.4156	1.0646	2.09158	0.00494811	0.0323827		29.0907	0.675175	1.59679	0.11654	0.799738
LOCUS_00940		67414..67698	53.2436	0.048451	1.03415	0.929512	0.9999		50.8284	-0.0745647	-1.05304	0.885412	0.99997		51.1287	-0.0151822	-1.01058	0.977471	0.999997		51.7408	-0.220689	-1.16529	0.553208	0.818883		50.8284	-0.231887	-1.17437	0.559124	0.990494		54.1279	-0.0874494	-1.06249	0.821467	0.99192		58.6819	-0.139355	-1.10141	0.715264	0.837947		52.5479	-0.108949	-1.07844	0.794089	0.982103
LOCUS_00950		67719..68165	58.5139	-0.278584	-1.213	0.529457	0.9999		58.5139	-0.133929	-1.09728	0.761252	0.99997		58.5139	-0.220397	-1.16505	0.628688	0.999997		61.5139	-0.156259	-1.11439	0.681847	0.885993		58.5139	-0.166122	-1.12204	0.653168	0.990545		58.5139	-0.200387	-1.14901	0.591888	0.991074		66.0061	-0.154009	-1.11266	0.708958	0.83538		58.5139	-0.236578	-1.1782	0.546559	0.960549
LOCUS_00960		complement(68198..68623)	2030.55	-0.111059	-1.08002	0.83714	0.9999		2030.55	-0.0394261	-1.0277	0.934955	0.99997		2030.55	-0.102104	-1.07334	0.852027	0.999997		2030.55	-0.866558	-1.82331	0.0412164	0.287795		2030.55	-0.917317	-1.8886	0.031529	0.589238		2030.55	-0.794638	-1.73464	0.100929	0.991074		2030.55	-1.27087	-2.41307	0.0104274	0.0557321		2030.55	-0.863994	-1.82007	0.0353848	0.521532
LOCUS_00970		complement(68617..68964)	2355.13	0.0427818	1.0301	0.939208	0.9999		2354.95	-0.00524346	-1.00364	0.991283	0.99997		2327.49	-0.0903342	-1.06462	0.867846	0.999997		2327.49	-0.93461	-1.91137	0.027992	0.236047		2327.49	-0.80924	-1.75229	0.0547238	0.759292		2327.49	-0.757046	-1.69003	0.116115	0.991074		2327.49	-1.25768	-2.39111	0.0108874	0.057388		2327.49	-0.841914	-1.79243	0.039288	0.542421
LOCUS_00980		complement(69280..69669)	49.4103	-0.0881156	-1.06298	0.869182	0.9999		49.4103	-0.212135	-1.1584	0.661285	0.99997		49.4103	-0.312841	-1.24215	0.512746	0.999997		49.4103	-0.318917	-1.24739	0.419956	0.745598		49.4103	-0.309297	-1.2391	0.391124	0.989854		49.4103	-0.236605	-1.17822	0.536049	0.991074		49.4103	-0.378801	-1.30026	0.291201	0.492935		49.4103	-0.176626	-1.13024	0.607493	0.962359
LOCUS_00990		69770..70093	25.995	-0.26443	-1.20116	0.667181	0.9999		25.995	-0.288399	-1.22128	0.625188	0.99997		25.995	-0.479175	-1.39395	0.431035	0.999997		25.995	-0.657036	-1.57684	0.0989761	0.429159		25.995	-0.650713	-1.56994	0.133705	0.937841		25.995	-0.211408	-1.15782	0.601442	0.991074		25.995	-0.58396	-1.49896	0.133019	0.306316		25.995	-0.163365	-1.1199	0.713129	0.966083
LOCUS_01000		70069..70209	30.1625	-0.40434	-1.32348	0.453814	0.9999		30.1625	-0.195206	-1.14489	0.712188	0.99997		30.1625	-0.277177	-1.21182	0.621496	0.999997		30.1625	-0.614001	-1.5305	0.13091	0.474906		30.1625	-0.396695	-1.31649	0.288532	0.989854		30.1625	-0.202033	-1.15032	0.616228	0.991074		30.1625	-0.693332	-1.61701	0.0495445	0.163475		30.1625	-0.176114	-1.12984	0.635067	0.964239
LOCUS_01010		70547..70717	38.3567	0.306648	1.23683	0.599593	0.9999		40.0635	0.371614	1.2938	0.534907	0.99997		34.7498	0.189632	1.14047	0.750687	0.999997		31.0482	-0.24637	-1.18622	0.55135	0.817925		30.9899	-0.496772	-1.41105	0.236803	0.989854		30.9899	-0.335394	-1.26172	0.4527	0.991074		30.9899	-0.433143	-1.35017	0.294814	0.496417		37.1627	0.105374	1.07577	0.792137	0.982103
uspD		70744..71100	47.7624	-0.00914567	-1.00636	0.986736	0.9999		48.9522	0.0424711	1.02988	0.935009	0.99997		47.1253	-0.0677759	-1.0481	0.899534	0.999997		47.1253	-0.454611	-1.37041	0.249608	0.618555		47.1253	-0.307015	-1.23715	0.449203	0.989854		47.1253	-0.243047	-1.18349	0.555179	0.991074		47.1253	-0.464599	-1.37993	0.239388	0.438658		49.0903	-0.119411	-1.08629	0.776901	0.980694
LOCUS_01030		complement(71176..71922)	66.5385	-0.0156593	-1.01091	0.970049	0.9999		67.2806	0.0119332	1.00831	0.977151	0.99997		66.5385	-0.0847599	-1.06051	0.841634	0.999997		66.5385	-0.3993	-1.31887	0.250882	0.621055		69.0227	-0.0599203	-1.04241	0.848762	0.990545		66.5385	-0.154199	-1.1128	0.669491	0.991074		66.5385	-0.583475	-1.49845	0.0866481	0.232458		66.5385	-0.170036	-1.12509	0.583875	0.960549
glpX		complement(72018..73028)	237.388	-0.0608369	-1.04307	0.893411	0.9999		237.388	-0.080846	-1.05764	0.845635	0.99997		237.388	-0.142067	-1.10348	0.753287	0.999997		237.388	-0.855234	-1.80905	0.0177709	0.18151		237.388	-0.504161	-1.4183	0.151698	0.949865		237.388	-0.527845	-1.44177	0.166133	0.991074		237.388	-1.11218	-2.16173	0.00263389	0.0201107		237.388	-0.60352	-1.51942	0.0825987	0.721803
glpK		complement(73037..74641)	129.23	0.68952	1.61275	0.137342	0.9999		96.5377	0.305292	1.23567	0.551353	0.99997		78.6683	-0.0446528	-1.03143	0.927465	0.999997		78.6683	-0.304756	-1.23521	0.370549	0.710605		78.6683	-0.51084	-1.42488	0.118881	0.927511		78.6683	-0.236809	-1.17838	0.491373	0.991074		78.6683	-0.56511	-1.4795	0.0923165	0.242799		78.6683	-0.496169	-1.41046	0.136052	0.831876
glpF		complement(74616..75494)	85.2632	0.155121	1.11351	0.785465	0.9999		74.2891	-0.270823	-1.2065	0.684357	0.99997		81.5153	0.158163	1.11587	0.808083	0.999997		74.2891	-1.2794	-2.42738	0.00806859	0.121586		74.2891	-0.742467	-1.67303	0.160099	0.958238		74.2891	-1.29124	-2.44738	0.00972756	0.494015		74.2891	-1.51273	-2.85349	0.0015185	0.0130404		74.2891	-0.279877	-1.21409	0.653316	0.965182
LOCUS_01070		75993..76172	425.698	-0.0155735	-1.01085	0.974282	0.9999		425.698	-0.0501943	-1.0354	0.915938	0.99997		507.252	0.268997	1.20497	0.566978	0.999997		425.698	-0.860363	-1.81549	0.0293639	0.24045		425.698	-0.583393	-1.49837	0.168695	0.966145		425.698	-0.671607	-1.59285	0.0580277	0.991074		425.698	-1.06314	-2.08948	0.00271071	0.020574		425.698	-0.590014	-1.50526	0.184045	0.859667
rraA		complement(76320..76805)	278.773	0.0326422	1.02288	0.93786	0.9999		280.005	0.0480041	1.03383	0.917772	0.99997		285.175	0.0906911	1.06488	0.844335	0.999997		291.559	-0.112589	-1.08117	0.72373	0.902561		288.79	-0.0177433	-1.01237	0.959978	0.995544		285.973	-0.0693303	-1.04923	0.835231	0.99192		271.999	-0.313075	-1.24235	0.369893	0.568603		283.164	-0.0649842	-1.04607	0.842279	0.99292
LOCUS_01090		complement(76898..77542)	96.1673	-0.199205	-1.14807	0.691611	0.9999		96.1673	-0.151837	-1.11098	0.771132	0.99997		96.1673	-0.388506	-1.30904	0.437841	0.999997		96.1673	-0.650721	-1.56995	0.0529307	0.324839		96.1673	-0.666581	-1.58731	0.0462986	0.721263		96.1673	-0.598181	-1.51381	0.0808289	0.991074		96.1673	-0.484268	-1.39888	0.163405	0.348953		96.1673	-0.580397	-1.49526	0.085178	0.728498
LOCUS_01100		complement(77889..78677)	363.762	0.00473108	1.00328	0.992196	0.9999		351.587	-0.157201	-1.11512	0.739595	0.99997		351.587	-0.24911	-1.18847	0.616214	0.999997		351.587	-0.83145	-1.77947	0.024029	0.215506		351.587	-0.678654	-1.60065	0.0531123	0.747454		351.587	-0.405814	-1.32484	0.340419	0.991074		351.587	-0.971445	-1.9608	0.0167758	0.0776604		351.587	-0.421958	-1.33974	0.247441	0.90219
LOCUS_01110		complement(78635..79219)	373.623	-0.0551485	-1.03897	0.899779	0.9999		373.623	-0.18689	-1.13831	0.653435	0.99997		373.623	-0.321081	-1.24927	0.49249	0.999997		373.623	-0.977242	-1.9687	0.0163375	0.173942		373.623	-0.711452	-1.63745	0.0582046	0.772476		373.623	-0.438075	-1.3548	0.275568	0.991074		373.623	-1.17053	-2.25095	0.00143859	0.0125659		373.623	-0.51644	-1.43042	0.180562	0.859667
hslV		complement(79229..79759)	380.74	-0.0169925	-1.01185	0.967768	0.9999		373.74	-0.155012	-1.11343	0.699624	0.99997		373.74	-0.248298	-1.1878	0.578714	0.999997		373.74	-0.858254	-1.81284	0.0223857	0.209335		373.74	-0.67757	-1.59944	0.0639086	0.794173		373.74	-0.313917	-1.24308	0.441067	0.991074		373.74	-0.995524	-1.99381	0.0079301	0.0460546		373.74	-0.349024	-1.2737	0.3455	0.937303
LOCUS_01130		complement(79850..80065)	94.5467	-0.0915719	-1.06553	0.867991	0.9999		96.0957	0.0161413	1.01125	0.971817	0.99997		95.5236	0.0166028	1.01157	0.972384	0.999997		94.5467	-0.343613	-1.26893	0.390647	0.724579		94.5467	-0.356632	-1.28043	0.308965	0.989854		113.023	0.109415	1.07879	0.767689	0.991074		102.473	-0.203578	-1.15155	0.502007	0.68259		94.5467	-0.282552	-1.21634	0.433717	0.952598
LOCUS_01140		complement(79948..80703)	176.775	-0.0219613	-1.01534	0.957966	0.9999		176.748	-0.0920646	-1.06589	0.84855	0.99997		176.748	-0.000214504	-1.00015	0.999625	0.999997		176.748	-0.390233	-1.31061	0.157972	0.513224		176.748	-0.327426	-1.25477	0.275304	0.989854		182.753	-0.104407	-1.07505	0.755403	0.991074		176.748	-0.44023	-1.35682	0.207398	0.402525		176.748	-0.282448	-1.21626	0.384274	0.948039
LOCUS_01150		complement(80899..81573)	73.049	-0.00269592	-1.00187	0.994902	0.9999		71.5485	-0.195907	-1.14544	0.655074	0.99997		78.3428	0.153076	1.11194	0.740841	0.999997		71.5485	-0.727114	-1.65532	0.042615	0.293314		71.5485	-0.420426	-1.33832	0.245383	0.989854		71.5485	-0.393468	-1.31355	0.293071	0.991074		71.5485	-0.914083	-1.88437	0.00240085	0.0188202		71.5485	-0.332063	-1.25881	0.299592	0.922572
LOCUS_01160		complement(81570..81773)	81.7463	-0.0712807	-1.05065	0.887739	0.9999		81.7463	-0.0505441	-1.03566	0.918958	0.99997		81.7463	0.00376904	1.00262	0.99421	0.999997		81.7463	-0.740761	-1.67106	0.0442621	0.298527		81.7463	-0.343882	-1.26917	0.366121	0.989854		81.7463	-0.451261	-1.36723	0.23268	0.991074		81.7463	-0.83745	-1.78689	0.0257495	0.105979		81.7463	-0.340915	-1.26656	0.447704	0.955457
LOCUS_01170		complement(81707..81922)	69.7463	-0.0723047	-1.05139	0.892094	0.9999		69.7463	-0.162079	-1.1189	0.747806	0.99997		69.7463	0.0110323	1.00768	0.983168	0.999997		69.7463	-0.623434	-1.54054	0.127501	0.470971		69.7463	-0.222996	-1.16715	0.554826	0.989854		69.7463	-0.376694	-1.29836	0.330327	0.991074		69.7463	-0.762771	-1.69675	0.0452893	0.155153		69.7463	-0.140093	-1.10198	0.738212	0.968441
LOCUS_01180		complement(82078..83106)	53.7232	0.0512603	1.03617	0.907732	0.9999		50.7695	-0.0698224	-1.04959	0.874832	0.99997		50.7695	-0.0676592	-1.04801	0.885429	0.999997		60.4561	0.0436669	1.03073	0.891091	0.967448		57.7985	0.0872832	1.06237	0.802125	0.990545		63.2834	0.181288	1.1339	0.543974	0.991074		64.8157	0.0451117	1.03176	0.892452	0.943557		63.326	0.200838	1.14937	0.55016	0.960549
LOCUS_01190		complement(83000..83686)	52.8584	0.0534137	1.03772	0.90734	0.9999		53.1687	0.0767714	1.05466	0.842425	0.99997		50.6322	0.0156698	1.01092	0.970917	0.999997		59.7235	0.0381026	1.02676	0.915774	0.972094		58.8469	0.126315	1.0915	0.670847	0.990545		62.7868	0.182451	1.13481	0.551517	0.991074		64.6323	0.0542953	1.03835	0.846461	0.920794		59.6212	0.125569	1.09094	0.652421	0.965182
LOCUS_01200		complement(83746..83931)	60.7158	0.271342	1.20693	0.598729	0.9999		62.0093	0.310759	1.24036	0.529808	0.99997		54.359	0.127565	1.09245	0.801483	0.999997		60.3022	0.0563255	1.03981	0.888283	0.966353		64.4173	0.260535	1.19792	0.503854	0.989854		67.3	0.286851	1.21997	0.512398	0.991074		58.8163	-0.0787155	-1.05608	0.832194	0.913334		58.3132	0.0978408	1.07017	0.820506	0.987153
LOCUS_01210		complement(83886..84272)	67.4555	0.126732	1.09182	0.77397	0.9999		68.1158	0.15192	1.11105	0.733885	0.99997		62.2831	0.025856	1.01808	0.9548	0.999997		72.8216	0.0379121	1.02663	0.921095	0.973598		74.0073	0.165505	1.12156	0.645329	0.990545		78.3394	0.210382	1.15699	0.549457	0.991074		82.5597	0.118528	1.08563	0.774612	0.877279		74.9828	0.170618	1.12554	0.649388	0.965182
LOCUS_01220		84537..84686	2205.23	-0.144702	-1.1055	0.768337	0.9999		2234.28	0.00462364	1.00321	0.992086	0.99997		2280.96	0.0676598	1.04802	0.897544	0.999997		2205.23	-0.400789	-1.32023	0.208022	0.574167		2211	-0.123613	-1.08946	0.715708	0.990545		2205.23	-0.314299	-1.24341	0.368983	0.991074		2205.23	-0.59705	-1.51262	0.0839088	0.228226		2205.23	-0.187554	-1.13883	0.51209	0.955457
LOCUS_01230		complement(84744..85091)	75.7864	0.363859	1.28686	0.54845	0.9999		58.0985	0.0235735	1.01647	0.968531	0.99997		62.3636	0.0940058	1.06733	0.883194	0.999997		88.6759	0.474165	1.38911	0.320152	0.674117		84.7165	0.521599	1.43555	0.276315	0.989854		102.644	0.76315	1.69719	0.104726	0.991074		106.442	0.63944	1.55772	0.165558	0.351639		87.1061	0.538416	1.45238	0.275742	0.919507
LOCUS_01240		complement(85410..85631)	226.012	-0.192269	-1.14256	0.668226	0.9999		226.012	-0.108929	-1.07843	0.80962	0.99997		226.012	-0.199936	-1.14865	0.672526	0.999997		226.012	-0.677092	-1.59891	0.0618477	0.349968		226.012	-0.419672	-1.33762	0.253043	0.989854		226.012	-0.48534	-1.39992	0.208455	0.991074		226.012	-0.857412	-1.81179	0.00902417	0.0503728		226.012	-0.433064	-1.3501	0.189502	0.862426
LOCUS_01250		86002..86508	17.1615	0.11338	1.08176	0.852579	0.9999		17.926	0.190745	1.14135	0.740956	0.99997		15.6484	-0.000184407	-1.00013	0.999743	0.999997		15.9031	-0.205188	-1.15284	0.63947	0.865546		16.6668	-0.026057	-1.01823	0.950337	0.993797		17.6791	0.0195117	1.01362	0.963192	0.996668		19.2848	-0.0241875	-1.01691	0.949955	0.975288		15.6484	-0.173871	-1.12808	0.695934	0.965584
LOCUS_01260		86448..86999	35.8632	-0.209548	-1.15633	0.690078	0.9999		35.8632	-0.0214305	-1.01497	0.963932	0.99997		35.8632	-0.0249086	-1.01742	0.958083	0.999997		35.8632	-0.316971	-1.24571	0.40856	0.738265		35.8632	-0.237806	-1.1792	0.484485	0.989854		35.8632	-0.181565	-1.13411	0.577877	0.991074		35.8632	-0.357037	-1.28079	0.296613	0.497917		35.8632	-0.226806	-1.17024	0.512441	0.955457
LOCUS_01270		86987..87160	57.4651	-0.20436	-1.15218	0.732356	0.9999		57.4651	-0.159808	-1.11714	0.745702	0.99997		57.4651	-0.299116	-1.23039	0.587211	0.999997		57.4651	-0.543719	-1.45773	0.180379	0.54114		57.4651	-0.523488	-1.43743	0.211559	0.987722		57.4651	-0.293268	-1.22541	0.50792	0.991074		57.4651	-0.452618	-1.36852	0.236156	0.435232		57.4651	-0.545588	-1.45962	0.208183	0.879463
LOCUS_01280		87163..89010	57.874	-0.0944188	-1.06764	0.83841	0.9999		57.874	-0.0770969	-1.05489	0.861465	0.99997		57.874	-0.0884344	-1.06322	0.83937	0.999997		57.874	-0.46128	-1.37676	0.165186	0.523096		57.874	-0.258816	-1.1965	0.322506	0.989854		57.874	-0.327558	-1.25489	0.230316	0.991074		57.8828	-0.339162	-1.26502	0.209793	0.405014		57.874	-0.335906	-1.26217	0.214569	0.887421
LOCUS_01290		88980..89594	48.4613	-0.0678398	-1.04815	0.879171	0.9999		48.4613	-0.0352608	-1.02474	0.942946	0.99997		48.4613	-0.10303	-1.07403	0.822811	0.999997		48.4613	-0.291322	-1.22376	0.369108	0.710502		48.4613	-0.141671	-1.10318	0.668747	0.990545		48.4613	-0.154864	-1.11332	0.671201	0.991074		56.4856	-0.104041	-1.07478	0.756107	0.864332		50.0161	-0.0903205	-1.06461	0.80049	0.983503
LOCUS_01300		complement(89743..90432)	4.74639	0.225505	1.16919	0.759717	0.9999		4.00391	-0.0207234	-1.01447	0.97556	0.99997		4.50221	0.175377	1.12926	0.808058	0.999997		7.86303	0.833403	1.78188	0.0996562	0.429618		5.76992	0.507521	1.4216	0.32455	0.989854		7.4981	0.842389	1.79302	0.10415	0.991074		10.0139	1.08531	2.12184	0.0278626	0.111319		5.63011	0.444133	1.3605	0.4446	0.955457
LOCUS_01310		90818..91288	2.50741	0.667337	1.58814	0.323517	0.9999		2.06249	0.468911	1.38406	0.547991	ND		1.56333	0.011817	1.00822	0.986519	0.999997		3.18178	0.80599	1.74835	0.108601	0.443441		1.55164	-0.109745	-1.07904	0.843538	0.990545		1.54797	-0.377204	-1.29882	0.541467	0.991074		4.85756	1.3139	2.48613	0.00928203	0.0512961		1.54797	-0.709576	-1.63532	0.271801	0.917771
LOCUS_01320		91285..91824	4.97393	0.414789	1.3331	0.465769	0.9999		4.65865	0.333369	1.25995	0.543618	0.99997		3.67378	-0.0186232	-1.01299	0.974472	0.999997		6.22731	0.533804	1.44774	0.166098	0.523512		3.67378	-0.474784	-1.38971	0.355053	0.989854		4.9139	0.265686	1.20221	0.537147	0.991074		7.32138	0.667293	1.58809	0.110718	0.273061		5.17149	0.356975	1.28074	0.397508	0.948039
LOCUS_01330		91785..92369	5.54451	-0.311985	-1.24141	0.571131	0.9999		5.75953	0.0494662	1.03488	0.919603	0.99997		5.87824	0.0839	1.05988	0.874011	0.999997		8.02936	0.312367	1.24174	0.409475	0.738699		6.45402	0.116149	1.08384	0.786674	0.990545		6.31828	0.0382783	1.02689	0.921365	0.994892		8.75044	0.336242	1.26246	0.373344	0.572013		6.29487	0.064633	1.04582	0.890895	0.993691
metF		92856..93638	12.1613	0.255654	1.19388	0.671236	0.9999		9.83279	-0.331212	-1.25807	0.577922	0.99997		10.5026	0.0861981	1.06157	0.879012	0.999997		14.896	0.377078	1.29871	0.322708	0.674276		14.48	0.445692	1.36197	0.288668	0.989854		15.4009	0.497842	1.4121	0.262135	0.991074		17.0613	0.473052	1.38804	0.192119	0.38449		14.3696	0.415154	1.33344	0.330656	0.936251
LOCUS_01350		93965..94198	154.536	0.200199	1.14886	0.681566	0.9999		214.953	0.757597	1.69067	0.238197	0.99997		128.826	-0.370978	-1.29323	0.544344	0.999997		128.826	-0.77103	-1.70649	0.102314	0.432359		128.826	-1.15953	-2.23385	0.00972202	0.288034		128.826	-0.856612	-1.81078	0.0602005	0.991074		128.826	-1.37248	-2.58915	0.000358171	0.00419219		128.826	-0.848192	-1.80024	0.0861629	0.730882
LOCUS_01360		94270..94575	290.406	0.196595	1.14599	0.666119	0.9999		381.921	0.685623	1.6084	0.280511	0.99997		241.168	-0.529401	-1.44333	0.3929	0.999997		241.168	-0.831878	-1.78	0.0665815	0.359723		241.168	-1.14902	-2.21763	0.00638644	0.213639		241.168	-0.884996	-1.84676	0.0319916	0.86484		241.168	-1.21858	-2.32717	0.00470699	0.0310938		241.168	-0.7503	-1.68214	0.139456	0.831876
LOCUS_01370		94626..96143	281.691	0.316964	1.24571	0.528983	0.9999		328.267	0.625167	1.54239	0.330273	0.99997		216.782	-0.569986	-1.48451	0.319869	0.999997		216.782	-0.650873	-1.57012	0.107431	0.441274		216.782	-1.00371	-2.00515	0.00763247	0.240218		216.782	-0.701713	-1.62644	0.110737	0.991074		216.782	-0.870132	-1.82783	0.0349707	0.130636		216.782	-0.592141	-1.50748	0.155011	0.839597
LOCUS_01380		96237..96794	45.1448	0.184968	1.13679	0.687398	0.9999		43.4596	0.201277	1.14972	0.664687	0.99997		39.0809	-0.267627	-1.20383	0.589742	0.999997		39.4439	-0.183451	-1.1356	0.637901	0.86435		43.3435	0.0606679	1.04295	0.867988	0.990545		39.5675	-0.117982	-1.08522	0.745179	0.991074		39.0809	-0.457107	-1.37279	0.153067	0.33522		44.5426	0.077639	1.05529	0.855272	0.993691
LOCUS_01390		96725..97075	31.442	0.162395	1.11914	0.754986	0.9999		27.8373	-0.0722683	-1.05137	0.885518	0.99997		27.8373	-0.0294197	-1.0206	0.953998	0.999997		28.5014	-0.172313	-1.12686	0.660423	0.875067		29.1735	-0.0277928	-1.01945	0.948147	0.993663		33.0933	0.115787	1.08357	0.790466	0.99192		27.8373	-0.454508	-1.37032	0.262457	0.462215		36.7849	0.284799	1.21824	0.486009	0.955457
LOCUS_01400		complement(97164..97418)	27.8974	0.22235	1.16663	0.784732	0.9999		23.5846	0.0226302	1.01581	0.973725	0.99997		23.5846	-0.158347	-1.11601	0.831217	0.999997		30.6417	0.25329	1.19192	0.655977	0.8722		31.3781	0.407875	1.32673	0.485793	0.989854		27.1985	0.16942	1.12461	0.754428	0.991074		25.7936	-0.0904023	-1.06467	0.868936	0.932724		29.3618	0.284369	1.21788	0.61458	0.962755
LOCUS_01410		complement(97451..97780)	15.03	-0.153511	-1.11227	0.854556	0.9999		15.03	-0.735142	-1.66456	0.3448	0.99997		15.03	-0.128424	-1.0931	0.878285	0.999997		20.3639	0.329762	1.25681	0.602012	0.847383		16.7319	0.165511	1.12156	0.790849	0.990545		21.9908	0.526645	1.44058	0.390744	0.991074		23.5889	0.446469	1.3627	0.469211	0.654293		16.3093	0.101505	1.07289	0.874606	0.993691
gldA		complement(98053..99156)	279.204	0.186254	1.13781	0.715527	0.9999		273.629	0.135285	1.09831	0.780515	0.99997		249.227	0.0121197	1.00844	0.980718	0.999997		246.309	-0.381058	-1.3023	0.26553	0.629637		246.309	-0.441298	-1.35783	0.209143	0.987722		246.309	-0.304937	-1.23536	0.461713	0.991074		246.309	-0.581455	-1.49636	0.103797	0.261908		246.309	-0.292096	-1.22442	0.396954	0.948039
fsa		complement(99167..99829)	85.0065	0.0680445	1.04829	0.873033	0.9999		80.5716	-0.06814	-1.04836	0.881066	0.99997		80.5716	-0.163458	-1.11997	0.718232	0.999997		80.5716	-0.396995	-1.31676	0.233118	0.600373		80.5716	-0.39488	-1.31483	0.284961	0.989854		80.5716	-0.29611	-1.22783	0.428806	0.991074		80.5716	-0.615191	-1.53176	0.0773504	0.21703		80.5716	-0.293906	-1.22596	0.361923	0.943225
LOCUS_01440		complement(99840..101303)	1.38457	-0.197205	-1.14648	0.728957	0.9999		1.58198	0.183391	1.13555	0.735914	0.99997		1.38457	-0.107651	-1.07747	0.855991	0.999997		2.35082	0.539781	1.45375	0.170014	0.527219		1.38457	-0.115701	-1.0835	0.813393	0.990545		2.04273	0.407324	1.32622	0.30887	0.991074		2.98338	0.783281	1.72104	0.0428484	0.149607		2.35033	0.634784	1.55271	0.149076	0.834482
LOCUS_01450		complement(101234..101974)	0.983377	-0.273177	-1.20847	0.690111	0.9999		0.983377	-0.361932	-1.28515	0.609664	ND		1.10674	0.208869	1.15578	0.788239	0.999997		1.203	0.0624258	1.04422	0.915267	0.972094		0.983377	-0.466823	-1.38206	0.483251	0.989854		0.983377	-0.377064	-1.2987	0.568606	0.991074		0.983377	-0.365809	-1.2886	0.507239	0.687343		0.983377	-0.596509	-1.51205	0.338705	0.93719
LOCUS_01460		complement(102046..102339)	1.65374	-0.419411	-1.33738	0.58503	0.9999		1.65374	-0.975984	-1.96698	0.221909	ND		1.65374	-0.958874	-1.94379	0.23955	0.999997		1.65374	-0.628713	-1.54618	0.362298	0.707556		1.65374	-0.680086	-1.60224	0.350689	0.989854		1.65374	-0.688836	-1.61198	0.362412	0.991074		1.65374	-0.407415	-1.32631	0.502971	0.683294		1.65374	-0.704704	-1.62981	0.354214	0.937916
LOCUS_01470		102551..102841	0.281836	0.834124	1.78277	0.623091	0.9999		0.140089	-0.00716015	-1.00498	0.996894	ND		0.281417	0.857919	1.81242	0.594971	ND		0.139823	-0.224797	-1.16861	0.90686	0.970415		0.83864	2.2105	4.62836	0.132326	ND		0.281473	0.72347	1.65115	0.658566	ND		0.571935	1.47716	2.784	0.330917	0.53077		0.139823	-0.135311	-1.09833	0.942948	ND
LOCUS_01480		102838..103725	1.27461	-0.317932	-1.24654	0.632534	0.9999		1.27461	-0.28306	-1.21677	0.699413	0.99997		1.27461	-0.68933	-1.61253	0.332799	0.999997		1.96042	0.383701	1.30468	0.456722	0.768513		2.01233	0.532902	1.44684	0.318735	0.989854		1.27461	-0.412481	-1.33097	0.442905	0.991074		1.59335	-0.00718322	-1.00499	0.989916	0.993948		1.54999	0.123383	1.08929	0.832926	0.990489
LOCUS_01490		103740..103886	0.824767	-1.39265	-2.6256	0.373012	0.9999		0.827229	-0.00577572	-1.00401	0.995965	ND		0.838021	0.0136763	1.00952	0.991738	0.999997		0.824767	-0.754647	-1.68722	0.56338	0.826118		0.824767	-0.641678	-1.56014	0.625423	ND		0.824767	-1.50236	-2.83307	0.323606	ND		1.13367	0.100661	1.07226	0.930441	0.964645		2.20396	1.19844	2.29492	0.288716	0.920983
LOCUS_01500		103898..104059	3.0122	0.556357	1.47055	0.473308	0.9999		1.99913	-2.72866	-6.62838	0.0570078	ND		3.28075	0.694961	1.61884	0.3981	0.999997		3.25639	0.461444	1.37692	0.550193	0.817332		4.52096	1.03783	2.05314	0.16253	0.959798		2.80668	0.328796	1.25596	0.657392	ND		2.05741	-0.284987	-1.2184	0.700893	0.828861		4.49682	1.0109	2.01517	0.149071	0.834482
LOCUS_01510		104110..104604	2.86364	-0.234778	-1.17673	0.714308	0.9999		2.86364	-0.0892758	-1.06384	0.882443	0.99997		2.86364	-0.0719972	-1.05117	0.90819	0.999997		4.42384	0.403064	1.32231	0.411953	0.741042		5.25427	0.756576	1.68948	0.0906542	0.886988		2.93591	-0.117606	-1.08493	0.826005	0.99192		7.56558	1.07222	2.10267	0.00891535	0.0499927		5.64262	0.839841	1.78985	0.0786454	0.708588
pflD		104624..106405	5.98947	0.0518669	1.03661	0.91913	0.9999		6.03458	0.0851647	1.06081	0.864991	0.99997		5.7068	-0.195911	-1.14545	0.697608	0.999997		9.98343	0.59115	1.50645	0.11671	0.454237		8.61914	0.481949	1.39663	0.193619	0.985597		5.7068	-0.163576	-1.12006	0.704471	0.991074		9.33749	0.388812	1.30931	0.309765	0.510795		9.74439	0.639486	1.55777	0.0940947	0.746835
LOCUS_01530		106568..106897	2.57842	0.903063	1.87003	0.21832	0.9999		2.34186	0.769573	1.70477	0.318833	ND		3.10375	1.17925	2.26459	0.113645	0.999997		3.43858	1.10514	2.1512	0.0709278	0.372945		3.814	1.36427	2.57446	0.0330048	0.60752		3.13747	1.04841	2.06825	0.0830954	0.991074		3.15313	0.882083	1.84303	0.120459	0.287632		2.82218	0.927825	1.90241	0.184645	0.859667
LOCUS_01540		106807..107247	4.22639	-0.110301	-1.07945	0.849285	0.9999		4.22639	-0.135569	-1.09853	0.807047	0.99997		4.22639	-0.648839	-1.56791	0.292143	0.999997		6.71042	0.444933	1.36125	0.32257	0.674276		6.07716	0.408975	1.32774	0.332631	0.989854		5.62895	0.263963	1.20077	0.551424	0.991074		8.86593	0.743258	1.67395	0.0859783	0.231874		7.80259	0.750896	1.68284	0.0892217	0.741494
frwD		107249..107590	10.0457	0.814193	1.75831	0.263701	0.9999		9.75803	0.816225	1.76079	0.257926	0.99997		9.08341	0.702227	1.62701	0.335228	0.999997		10.5409	0.770476	1.70583	0.124223	0.46601		9.25275	0.692727	1.61634	0.273049	0.989854		9.56727	0.706524	1.63187	0.162473	0.991074		11.4311	0.789111	1.72801	0.152092	0.33375		13.4912	1.21475	2.32101	0.0274625	0.454336
LOCUS_01560		complement(107577..107741)	16.4605	0.835686	1.78471	0.17853	0.9999		11.8255	0.377377	1.29898	0.529433	0.99997		10.909	0.26609	1.20254	0.676716	0.999997		9.32885	-0.178522	-1.13172	0.732573	0.9068		12.0684	0.294536	1.22649	0.577852	0.990494		9.09911	-0.407026	-1.32595	0.472405	0.991074		9.09911	-0.573392	-1.48802	0.286156	0.487103		9.32109	-0.0891288	-1.06373	0.864711	0.993691
LOCUS_01570		complement(107774..108196)	34.2946	0.592597	1.50796	0.25661	0.9999		25.946	0.219701	1.16449	0.676915	0.99997		25.7298	0.218729	1.16371	0.664475	0.999997		23.7481	-0.104665	-1.07524	0.791547	0.93251		22.7648	-0.0566763	-1.04007	0.894108	0.990545		24.8912	0.0339414	1.02381	0.940318	0.996072		25.7669	-0.0850561	-1.06073	0.82102	0.905883		23.0625	-0.0505036	-1.03563	0.907982	0.994151
LOCUS_01580		complement(108651..110216)	1043.57	2.19921	4.59226	3.1164e-06	0.000626149		635.755	1.46848	2.7673	0.000847518	0.142963		619.255	1.45547	2.74246	0.00442647	0.204211		226.085	-0.751535	-1.68358	0.0241996	0.216476		226.085	-0.476603	-1.39146	0.147825	0.949704		226.085	-0.359126	-1.28265	0.345607	0.991074		226.085	-0.805218	-1.74741	0.0292346	0.115175		226.085	-0.416016	-1.33424	0.189819	0.862426
LOCUS_01590		complement(110565..110921)	76.5146	0.275625	1.21052	0.527509	0.9999		65.4014	0.0552931	1.03907	0.89838	0.99997		62.4991	-0.0260194	-1.0182	0.956261	0.999997		62.4991	-0.248614	-1.18806	0.495202	0.790503		62.4991	-0.341158	-1.26677	0.363471	0.989854		64.7833	-0.101606	-1.07297	0.790267	0.99192		62.4991	-0.39714	-1.31689	0.164849	0.351234		62.4991	-0.227852	-1.17109	0.536953	0.958158
LOCUS_01600		complement(110834..112840)	111.837	0.163465	1.11997	0.688365	0.9999		100.593	0.0231354	1.01617	0.95118	0.99997		98.5943	-0.0763317	-1.05433	0.856204	0.999997		98.5943	-0.53414	-1.44808	0.136103	0.483292		98.5943	-0.28962	-1.22232	0.368287	0.989854		98.5943	-0.207715	-1.15486	0.573334	0.991074		98.5943	-0.627639	-1.54503	0.0703086	0.204831		98.5943	-0.256679	-1.19473	0.459124	0.955457
LOCUS_01610		complement(112774..113214)	100.311	0.186719	1.13817	0.666678	0.9999		87.8376	0.00538004	1.00374	0.98927	0.99997		87.0747	-0.0841334	-1.06005	0.840032	0.999997		87.0747	-0.566962	-1.4814	0.131355	0.475432		87.0747	-0.326311	-1.2538	0.314424	0.989854		87.0747	-0.281936	-1.21583	0.343761	0.991074		87.0747	-0.909856	-1.87886	0.00820749	0.0468757		87.0747	-0.25839	-1.19614	0.457586	0.955457
LOCUS_01620		complement(113515..113721)	14.6955	0.0726232	1.05163	0.89615	0.9999		16.6691	0.273713	1.20892	0.595481	0.99997		13.6837	-0.0301128	-1.02109	0.955559	0.999997		13.6837	-0.445939	-1.3622	0.256929	0.625291		13.6837	-0.308476	-1.2384	0.503092	0.989854		13.6837	-0.185127	-1.13692	0.662817	0.991074		13.6837	-0.643493	-1.56211	0.134976	0.309425		14.4686	-0.0555067	-1.03922	0.897782	0.993691
LOCUS_01630		complement(113682..114224)	21.9166	0.22003	1.16476	0.645352	0.9999		19.2137	0.0413727	1.02909	0.934035	0.99997		18.5725	-0.0411222	-1.02891	0.935227	0.999997		19.2478	-0.172203	-1.12678	0.664268	0.875756		18.5725	-0.1395	-1.10152	0.738654	0.990545		20.5837	-0.00184467	-1.00128	0.996662	0.998625		18.5725	-0.349299	-1.27394	0.331211	0.530924		19.9773	-0.0285321	-1.01997	0.944929	0.995228
LOCUS_01640		complement(114370..114663)	18.3738	0.13431	1.09757	0.810488	0.9999		16.536	-0.0287103	-1.0201	0.958613	0.99997		16.536	-0.38463	-1.30552	0.50076	0.999997		18.3287	-0.0746327	-1.05309	0.832959	0.946632		19.8988	0.153378	1.11217	0.692786	0.990545		18.0119	-0.0246703	-1.01725	0.954529	0.996072		18.2593	-0.179412	-1.13242	0.638315	0.782434		17.8981	-0.0186605	-1.01302	0.96243	0.997442
argC		115031..115819	12.3318	-0.0176811	-1.01233	0.975315	0.9999		13.7827	0.188893	1.13989	0.710397	0.99997		13.3315	0.121889	1.08816	0.808153	0.999997		12.3318	-0.294307	-1.2263	0.462508	0.771183		12.9766	-0.0278472	-1.01949	0.947971	0.993663		12.6567	-0.0997345	-1.07158	0.824991	0.99192		12.3318	-0.482669	-1.39733	0.222236	0.419707		12.3318	-0.171292	-1.12607	0.694795	0.965584
argB		115830..116603	14.762	0.0565819	1.04	0.904293	0.9999		15.9864	0.197578	1.14677	0.708926	0.99997		15.177	0.11038	1.07951	0.809718	0.999997		14.023	-0.272834	-1.20818	0.500565	0.793145		14.7523	-0.0416433	-1.02929	0.917757	0.991829		14.6602	-0.0866827	-1.06193	0.825373	0.99192		14.9465	-0.231537	-1.17409	0.508421	0.688372		14.023	-0.336373	-1.26258	0.438111	0.955304
LOCUS_01670		116663..117001	25.4163	0.155683	1.11395	0.799981	0.9999		28.8355	0.360083	1.2835	0.534859	0.99997		27.9072	0.317642	1.24629	0.576058	0.999997		22.4443	-0.477188	-1.39203	0.255492	0.62368		22.7768	-0.106366	-1.07651	0.804349	0.990545		27.2429	0.11452	1.08262	0.786523	0.99192		22.4443	-0.616758	-1.53343	0.104828	0.263812		22.4443	-0.251415	-1.19037	0.569437	0.960549
LOCUS_01680		116968..117183	12.0646	-0.00125831	-1.00087	0.998218	0.9999		13.9194	0.20264	1.1508	0.713078	0.99997		11.9929	-0.128717	-1.09332	0.831553	0.999997		14.0518	-0.00621473	-1.00432	0.987887	0.99626		12.2322	-0.087804	-1.06275	0.849813	0.990545		14.9586	0.166026	1.12196	0.680694	0.991074		11.9929	-0.582956	-1.49792	0.151213	0.332552		11.9929	-0.548147	-1.46221	0.224747	0.898386
LOCUS_01690		117110..118147	52.2894	0.560623	1.47491	0.220316	0.9999		39.5252	0.256452	1.19454	0.549126	0.99997		33.5387	-0.0741289	-1.05273	0.877957	0.999997		37.2047	-0.0798577	-1.05691	0.856837	0.955054		33.5387	-0.258012	-1.19583	0.478616	0.989854		33.5387	-0.504807	-1.41893	0.16797	0.991074		33.5387	-0.783497	-1.7213	0.041089	0.145795		33.5387	-0.424081	-1.34172	0.341048	0.937303
oxyR		118299..119216	273.516	0.176222	1.12992	0.670912	0.9999		250.787	0.058459	1.04135	0.882215	0.99997		267.462	0.17354	1.12782	0.691772	0.999997		237.902	-0.309389	-1.23918	0.385198	0.722011		237.902	-0.19158	-1.14201	0.564508	0.990494		261.605	-0.0352091	-1.02471	0.929497	0.996072		249.075	-0.274411	-1.2095	0.473476	0.658198		244.396	-0.112047	-1.08076	0.709304	0.966083
LOCUS_01710		complement(119199..119600)	58.9045	0.436718	1.35352	0.452094	0.9999		44.8997	0.0973773	1.06983	0.843481	0.99997		54.0457	0.378404	1.2999	0.437844	0.999997		66.8874	0.479515	1.39428	0.19845	0.562656		51.7122	0.218859	1.16381	0.543947	0.989854		73.0211	0.673448	1.59488	0.0909999	0.991074		91.6238	0.837396	1.78682	0.0474643	0.15911		60.5095	0.423412	1.3411	0.253751	0.904648
LOCUS_01720		complement(119818..120597)	60.9827	0.275279	1.21023	0.546344	0.9999		52.2047	0.106088	1.07631	0.799113	0.99997		56.7924	0.23921	1.18035	0.57701	0.999997		71.8154	0.342589	1.26803	0.348846	0.693337		48.0015	-0.140658	-1.10241	0.663979	0.990545		75.0011	0.474816	1.38974	0.244117	0.991074		106.043	0.804021	1.74596	0.0253812	0.104915		73.0689	0.458222	1.37385	0.170381	0.852245
LOCUS_01730		120926..121372	2.53581	-0.120619	-1.0872	0.852827	0.9999		2.53581	-0.416276	-1.33448	0.517405	0.99997		3.47878	0.448943	1.36504	0.473623	0.999997		5.70691	0.939167	1.91742	0.0357543	0.269348		3.45227	0.327266	1.25463	0.515484	0.989854		2.53581	-0.338359	-1.26432	0.485083	0.991074		6.42494	1.00927	2.0129	0.0200549	0.0886521		3.62245	0.376183	1.2979	0.472342	0.955457
LOCUS_01740		121410..122090	6.9639	-0.0738855	-1.05255	0.902723	0.9999		6.9639	-0.145992	-1.10649	0.792441	0.99997		7.80648	0.135823	1.09872	0.82184	0.999997		9.80908	0.275788	1.21066	0.483297	0.782618		8.64589	0.203274	1.15131	0.611354	0.990545		8.16609	0.079435	1.0566	0.853464	0.99192		12.2848	0.50059	1.41479	0.181956	0.37095		8.97336	0.240184	1.18114	0.565468	0.960549
LOCUS_01750		122345..122758	5.58013	-0.475642	-1.39054	0.437075	0.9999		5.58013	-0.0833116	-1.05945	0.878555	0.99997		7.11541	0.347575	1.27242	0.552501	0.999997		12.7065	0.96559	1.95286	0.0261879	0.228658		7.94466	0.395876	1.31574	0.392925	0.989854		6.02132	-0.0430287	-1.03027	0.917259	0.994319		9.75273	0.480992	1.3957	0.20884	0.40399		5.66949	-0.108933	-1.07843	0.806118	0.985998
LOCUS_01760		122997..123443	4.34987	-0.440421	-1.357	0.510778	0.9999		4.34987	-0.0358021	-1.02513	0.950468	0.99997		4.3901	-0.0277735	-1.01944	0.963966	0.999997		7.33624	0.528416	1.44234	0.176044	0.535003		7.17282	0.599401	1.51509	0.22915	0.989854		6.1195	0.339881	1.26565	0.415145	0.991074		12.0984	1.14875	2.21722	0.0020073	0.0163037		5.61313	0.233171	1.17542	0.614898	0.962755
LOCUS_01770		123730..124194	149.704	0.0152854	1.01065	0.972964	0.9999		146.324	-0.0912419	-1.06529	0.849064	0.99997		146.324	-0.0365015	-1.02562	0.935078	0.999997		149.899	-0.176557	-1.13018	0.650431	0.87018		178.945	0.187933	1.13913	0.594903	0.990545		160.603	-0.00568016	-1.00394	0.985242	0.99757		146.324	-0.32351	-1.25137	0.240239	0.439659		163.034	0.0356999	1.02505	0.931891	0.994342
yijD		124194..124553	253.18	-0.0761458	-1.0542	0.842806	0.9999		253.18	-0.187789	-1.13902	0.660781	0.99997		256.587	0.0145305	1.01012	0.969853	0.999997		263.922	-0.161915	-1.11877	0.626485	0.857337		293.128	0.0970932	1.06962	0.707467	0.990545		290.578	0.0493484	1.0348	0.859213	0.99192		253.18	-0.431311	-1.34846	0.20421	0.398565		274.66	-0.0141074	-1.00983	0.955718	0.995383
trmA		complement(124593..125639)	192.846	-0.140801	-1.10252	0.729342	0.9999		192.846	-0.108388	-1.07802	0.777087	0.99997		192.846	-0.093469	-1.06693	0.820908	0.999997		192.846	-0.324151	-1.25193	0.332801	0.679571		192.846	-0.269351	-1.20527	0.398353	0.989854		197.759	-0.130828	-1.09492	0.712842	0.991074		192.846	-0.370187	-1.29252	0.313288	0.514368		192.846	-0.272245	-1.20769	0.431769	0.951393
LOCUS_01800		126182..126712	236.594	-0.205189	-1.15284	0.671058	0.9999		236.594	-0.120637	-1.08721	0.801365	0.99997		236.594	-0.0767913	-1.05467	0.871525	0.999997		236.594	-0.758173	-1.69135	0.0210012	0.201783		236.594	-0.511063	-1.4251	0.113454	0.927511		236.594	-0.429179	-1.34647	0.13506	0.991074		236.594	-0.939808	-1.91827	0.000918202	0.00886088		236.594	-0.397694	-1.3174	0.207058	0.879093
LOCUS_01810		126769..127686	236.15	-0.194174	-1.14407	0.649664	0.9999		236.15	-0.11835	-1.08549	0.766219	0.99997		236.15	-0.123291	-1.08922	0.775229	0.999997		236.15	-0.734809	-1.66418	0.0455109	0.303142		236.15	-0.496381	-1.41067	0.144596	0.948559		236.15	-0.363036	-1.28613	0.329332	0.991074		236.15	-1.00943	-2.01311	0.00563162	0.0358644		236.15	-0.484825	-1.39942	0.164325	0.850893
LOCUS_01820		127737..127901	63.5063	-0.243944	-1.18423	0.668909	0.9999		64.4638	-0.00634611	-1.00441	0.989712	0.99997		65.5251	0.0391029	1.02747	0.935735	0.999997		63.5063	-0.365861	-1.28865	0.363181	0.70822		63.5063	-0.150561	-1.11	0.721827	0.990545		63.5063	-0.409451	-1.32818	0.379359	0.991074		63.5063	-0.606574	-1.52264	0.126555	0.297252		63.5063	-0.210392	-1.157	0.635369	0.964239
murI		127846..128703	138.674	-0.11521	-1.08313	0.807867	0.9999		138.674	-0.0551356	-1.03896	0.906509	0.99997		138.674	-0.0765101	-1.05446	0.869305	0.999997		138.674	-0.629499	-1.54703	0.0488316	0.3113		138.674	-0.27221	-1.20766	0.388961	0.989854		138.674	-0.329558	-1.25663	0.240805	0.991074		138.674	-0.820387	-1.76588	0.00289826	0.0216323		138.674	-0.391629	-1.31187	0.203133	0.876108
LOCUS_r00040		129075..130609	15.5005	-0.0474534	-1.03344	0.925857	0.9999		15.5005	-0.386395	-1.30712	0.458772	0.99997		323.961	4.20564	18.4511	1.21672e-06	0.000178998		18.4708	0.00351499	1.00244	0.992778	0.997144		15.5005	-0.582828	-1.49778	0.133451	0.937841		929.154	5.75145	53.8715	4.44376e-09	5.274e-06		687.613	5.11606	34.6806	7.15483e-07	2.00309e-05		15.5005	-0.309072	-1.23891	0.452916	0.955457
LOCUS_t00020		130679..130755	0.523666	2.30729	4.94952	0.46616	0.9999		0	ND	ND	ND	ND		0	ND	ND	ND	ND		0	ND	ND	ND	ND		0	ND	ND	ND	ND		0	ND	ND	ND	ND		0	ND	ND	ND	ND		0	ND	ND	ND	ND
LOCUS_t00030		130798..130873	0	ND	ND	ND	ND		0	ND	ND	ND	ND		0	ND	ND	ND	ND		0	ND	ND	ND	ND		0	ND	ND	ND	ND		0	ND	ND	ND	ND		0	ND	ND	ND	ND		0.532158	2.18443	4.54549	0.49358	ND
LOCUS_r00050		131058..133949	93.8134	-0.492697	-1.40707	0.261886	0.9999		93.8134	-0.0233615	-1.01632	0.96549	0.99997		1444.17	3.81342	14.059	2.47769e-06	0.000328881		128.593	0.257944	1.19577	0.494388	0.789873		93.8134	-0.165562	-1.1216	0.592897	0.990494		3553.61	5.14008	35.263	1.03973e-08	7.40392e-06		3570.25	4.94261	30.7519	4.89884e-07	1.44563e-05		120.178	0.24131	1.18207	0.425772	0.950827
LOCUS_r00060		134055..134164	0	ND	ND	ND	ND		0	ND	ND	ND	ND		0	ND	ND	ND	ND		0	ND	ND	ND	ND		0	ND	ND	ND	ND		0	ND	ND	ND	ND		0	ND	ND	ND	ND		0	ND	ND	ND	ND
murB		134301..135329	151.061	-0.182185	-1.1346	0.681784	0.9999		151.061	-0.1417	-1.1032	0.749395	0.99997		151.061	-0.224391	-1.16828	0.624925	0.999997		151.061	-0.342518	-1.26797	0.323483	0.674276		151.061	-0.239656	-1.18071	0.48484	0.989854		151.061	-0.226408	-1.16992	0.52097	0.991074		151.061	-0.407658	-1.32653	0.250667	0.451019		151.061	-0.298017	-1.22945	0.365315	0.945566
birA		135326..136291	132.928	-0.101098	-1.07259	0.825758	0.9999		132.928	-0.0393079	-1.02762	0.933706	0.99997		132.928	-0.109657	-1.07897	0.812013	0.999997		146.87	-0.0696654	-1.04947	0.821747	0.943373		138.584	-0.0447037	-1.03147	0.892537	0.990545		155.541	0.0845435	1.06035	0.809225	0.99192		150.895	-0.129445	-1.09387	0.71616	0.838354		138.772	-0.0607649	-1.04302	0.855379	0.993691
coaA		complement(136318..137244)	184.55	-0.0837226	-1.05975	0.850666	0.9999		184.55	-0.105269	-1.07569	0.794305	0.99997		184.55	-0.133446	-1.09691	0.767189	0.999997		184.55	-0.250016	-1.18922	0.492333	0.789092		184.55	-0.125486	-1.09087	0.710953	0.990545		201.599	-0.0135712	-1.00945	0.970895	0.997173		184.55	-0.359707	-1.28317	0.292097	0.493462		185.025	-0.11856	-1.08565	0.71825	0.966083
LOCUS_t00040		137628..137703	0	ND	ND	ND	ND		0.53182	2.31022	4.95959	0.466311	ND		0	ND	ND	ND	ND		0.534762	2.09385	4.26885	0.512176	0.797396		0	ND	ND	ND	ND		0	ND	ND	ND	ND		0	ND	ND	ND	ND		0	ND	ND	ND	ND
LOCUS_t00050		137711..137794	3.85546	-0.971005	-1.96021	0.291521	0.9999		3.85546	-0.657714	-1.57758	0.510421	ND		3.85546	-0.388584	-1.30911	0.663713	0.999997		3.85546	-0.410028	-1.32871	0.581851	0.836691		4.34544	0.0549526	1.03882	0.947482	0.99363		3.85546	-0.771339	-1.70685	0.389773	ND		5.45258	0.162614	1.11931	0.808934	0.897268		3.85546	-0.786679	-1.7251	0.336712	0.936867
LOCUS_t00060		137912..137986	3.26231	-0.0136849	-1.00953	0.988568	0.9999		3.24409	-0.948786	-1.93025	0.371099	ND		3.24409	-0.544871	-1.45889	0.593908	0.999997		4.31713	0.177056	1.13057	0.819248	0.942075		3.24409	-1.05378	-2.07596	0.306807	ND		3.24409	-0.675981	-1.59768	0.524713	ND		4.43243	0.115537	1.08338	0.884678	0.940286		3.24409	-0.386007	-1.30677	0.666138	0.965182
LOCUS_t00070		137993..138068	1.6007	-3.71489	-13.1309	0.215189	0.9999		1.6007	-3.71147	-13.0998	0.216173	ND		1.6007	-0.519444	-1.4334	0.704814	0.999997		1.6007	-3.928	-15.2211	0.196079	0.560016		1.60555	-0.110705	-1.07976	0.92253	ND		1.6007	-1.50225	-2.83283	0.323658	ND		1.6007	-0.817654	-1.76254	0.534395	0.704325		1.6007	-3.83756	-14.2962	0.205615	ND
tuf		138182..139366	9845.33	-0.100692	-1.07229	0.836282	0.9999		9845.33	-0.0895613	-1.06405	0.839419	0.99997		9845.33	-0.0877337	-1.0627	0.860441	0.999997		9845.33	-0.713583	-1.63987	0.0382461	0.279311		9845.33	-0.702028	-1.62679	0.0517687	0.741237		9845.33	-0.690474	-1.61381	0.178597	0.991074		9845.33	-0.786361	-1.72472	0.145658	0.325163		9845.33	-0.783805	-1.72167	0.0216843	0.404262
secE		139594..139977	2306.08	-0.0647662	-1.04592	0.88411	0.9999		2306.08	-0.0186374	-1.013	0.964291	0.99997		2306.08	-0.0767727	-1.05466	0.87516	0.999997		2341.32	-0.220935	-1.16549	0.531855	0.808674		2306.08	-0.256814	-1.19484	0.486363	0.989854		2306.08	-0.232688	-1.17502	0.625689	0.991074		2506.48	-0.223536	-1.16759	0.656724	0.795568		2306.08	-0.239295	-1.18042	0.468298	0.955457
nusG		140080..140523	1803.66	-0.0846641	-1.06044	0.850429	0.9999		1803.66	-0.0469738	-1.0331	0.911133	0.99997		1803.66	-0.0331062	-1.02321	0.946623	0.999997		1909.14	-0.16802	-1.12352	0.651715	0.871096		1803.66	-0.263276	-1.2002	0.482895	0.989854		1803.66	-0.242796	-1.18328	0.617376	0.991074		2228.23	-0.046406	-1.03269	0.926959	0.963133		1803.66	-0.274755	-1.20979	0.445947	0.955457
LOCUS_01900		140680..140850	4229.88	-0.162554	-1.11927	0.7218	0.9999		4229.88	-0.109353	-1.07874	0.799869	0.99997		4229.88	-0.0972568	-1.06974	0.847532	0.999997		4229.88	-0.520402	-1.43435	0.184867	0.54482		4229.88	-0.368031	-1.29059	0.343141	0.989854		4229.88	-0.459755	-1.37531	0.312876	0.991074		4229.88	-0.813025	-1.75689	0.0834631	0.227256		4229.88	-0.415281	-1.33356	0.264742	0.9169
LOCUS_01910		140969..141106	6696.95	-0.0554389	-1.03918	0.901546	0.9999		6696.95	-0.00740765	-1.00515	0.985668	0.99997		6696.95	0.0152869	1.01065	0.975107	0.999997		6696.95	-0.488074	-1.40257	0.174972	0.533166		6696.95	-0.235892	-1.17763	0.479876	0.989854		6696.95	-0.226337	-1.16986	0.634316	0.991074		6696.95	-0.655553	-1.57522	0.193605	0.386574		6696.95	-0.325834	-1.25339	0.319535	0.927355
rplA		141110..141796	11303.3	-0.0943944	-1.06762	0.827103	0.9999		11303.3	-0.0525638	-1.03711	0.889311	0.99997		11303.3	-0.0456537	-1.03215	0.919034	0.999997		11303.3	-0.484817	-1.39941	0.0877413	0.409746		11303.3	-0.323693	-1.25153	0.292337	0.989854		11303.3	-0.38158	-1.30277	0.428819	0.991074		11303.3	-0.616098	-1.53272	0.229023	0.427843		11303.3	-0.377297	-1.29891	0.169397	0.852245
LOCUS_01930		142104..142274	9518.06	-0.0737975	-1.05248	0.872862	0.9999		9518.06	-0.112748	-1.08129	0.787682	0.99997		9518.06	-0.103491	-1.07437	0.830942	0.999997		9518.06	-0.575476	-1.49017	0.084227	0.402257		9518.06	-0.322569	-1.25056	0.31879	0.989854		9518.06	-0.435724	-1.35259	0.367961	0.991074		9518.06	-0.776205	-1.71262	0.111757	0.274827		9518.06	-0.414932	-1.33324	0.156092	0.842071
LOCUS_01940		142258..142602	20365.2	-0.0700665	-1.04977	0.873791	0.9999		20365.2	-0.0628458	-1.04452	0.872047	0.99997		20365.2	-0.0729112	-1.05184	0.871234	0.999997		20365.2	-0.557614	-1.47183	0.0682846	0.365076		20365.2	-0.36637	-1.28911	0.249418	0.989854		20365.2	-0.438923	-1.35559	0.363687	0.991074		20365.2	-0.782473	-1.72008	0.129319	0.301761		20365.2	-0.429727	-1.34698	0.133352	0.831876
LOCUS_01950		142668..142838	16301.5	-0.186717	-1.13817	0.684826	0.9999		16301.5	-0.132284	-1.09603	0.750838	0.99997		16301.5	-0.110141	-1.07933	0.826574	0.999997		16301.5	-0.607893	-1.52403	0.0545449	0.328387		16301.5	-0.394845	-1.3148	0.236661	0.989854		16301.5	-0.484225	-1.39883	0.31653	0.991074		16301.5	-0.800434	-1.74162	0.117924	0.283953		16301.5	-0.420459	-1.33835	0.17197	0.855201
LOCUS_01960		143350..143739	1536.62	-0.0655308	-1.04647	0.890789	0.9999		1536.62	-0.0466342	-1.03285	0.91268	0.99997		1536.62	-0.0458864	-1.03232	0.924223	0.999997		1686.99	-0.0894025	-1.06393	0.808645	0.937917		1543.84	-0.109403	-1.07878	0.763089	0.990545		1661.89	-0.0415629	-1.02923	0.925014	0.995435		1854	-0.0528908	-1.03734	0.90754	0.951597		1625.42	-0.0532559	-1.0376	0.879434	0.993691
rpoB		143718..147377	1310.39	-0.0857901	-1.06127	0.834871	0.9999		1310.39	-0.0752869	-1.05357	0.835815	0.99997		1310.39	-0.0501691	-1.03539	0.91602	0.999997		1543.6	0.00508046	1.00353	0.985275	0.995321		1322.34	-0.110709	-1.07976	0.70724	0.990545		1383.94	-0.0835616	-1.05963	0.858082	0.99192		1808.55	0.134216	1.0975	0.789972	0.885561		1381.67	-0.0643315	-1.0456	0.811257	0.986137
LOCUS_01980		147726..149267	1471.95	-0.181133	-1.13377	0.677648	0.9999		1471.95	-0.0984535	-1.07063	0.802894	0.99997		1471.95	-0.10153	-1.07291	0.832239	0.999997		1764.54	0.0231619	1.01618	0.936149	0.979348		1471.95	-0.180644	-1.13339	0.559877	0.990494		1471.95	-0.245399	-1.18542	0.619447	0.991074		2252.63	0.275729	1.21061	0.587885	0.743293		1471.95	-0.213486	-1.15949	0.451284	0.955457
LOCUS_01990		149261..151447	1579.97	-0.189644	-1.14048	0.66234	0.9999		1579.97	-0.110379	-1.07951	0.773653	0.99997		1579.97	-0.120191	-1.08688	0.806392	0.999997		2266.77	0.279098	1.21344	0.320997	0.674117		1579.97	-0.211226	-1.15767	0.494426	0.989854		1579.97	-0.32133	-1.24948	0.479128	0.991074		3249.45	0.698696	1.62304	0.165183	0.351571		1579.97	-0.276886	-1.21158	0.319685	0.927355
LOCUS_02000		151441..151674	682.161	-0.0950856	-1.06813	0.834065	0.9999		682.161	-0.0782842	-1.05576	0.861264	0.99997		682.161	-0.0371468	-1.02608	0.935701	0.999997		1103.64	0.446767	1.36298	0.21232	0.580005		700.913	-0.10355	-1.07441	0.767613	0.990545		682.161	-0.288159	-1.22108	0.428647	0.991074		1579.3	0.864266	1.82041	0.0196061	0.0873249		682.161	-0.252339	-1.19114	0.484309	0.955457
LOCUS_02010		complement(151913..152335)	6.70995	0.0519108	1.03664	0.926463	0.9999		6.42526	-0.0561211	-1.03967	0.921238	0.99997		6.77595	0.104357	1.07502	0.852319	0.999997		15.2231	1.0218	2.03045	0.0087792	0.125007		7.68422	0.156429	1.11453	0.707718	0.990545		8.13488	0.200694	1.14925	0.635369	0.991074		32.6602	2.02224	4.06215	5.06565e-06	0.000115861		8.13418	0.231666	1.17419	0.623136	0.964103
LOCUS_02020		complement(152410..153045)	4.90978	0.2057	1.15325	0.706201	0.9999		4.72299	0.159431	1.11685	0.772605	0.99997		4.201	-0.276277	-1.21107	0.630731	0.999997		8.78753	0.837377	1.7868	0.0264417	0.230203		4.201	-0.176833	-1.1304	0.699452	0.990545		4.55196	-0.0338578	-1.02375	0.934763	0.996072		15.7016	1.57407	2.97744	2.52507e-05	0.000448871		5.98202	0.373672	1.29565	0.383683	0.948039
thiG		complement(153042..153812)	4.72771	-0.0685615	-1.04867	0.896382	0.9999		4.72771	-0.121023	-1.08751	0.789515	0.99997		4.72771	-0.104992	-1.07549	0.826319	0.999997		10.5027	0.926031	1.90004	0.0235708	0.214935		6.06012	0.243116	1.18355	0.515474	0.989854		4.72771	-0.234161	-1.17622	0.534917	0.991074		15.5399	1.39125	2.62306	0.000664904	0.00682129		5.77509	0.154383	1.11295	0.689353	0.965584
LOCUS_02040		complement(153814..153987)	1.86837	-0.414113	-1.33248	0.657644	0.9999		2.56517	0.44277	1.35921	0.593861	ND		1.86837	-0.897071	-1.86228	0.391509	0.999997		4.42239	0.999334	1.99908	0.143091	0.494891		1.86957	-0.109468	-1.07883	0.898848	0.990545		3.32524	0.670427	1.59154	0.39344	0.991074		5.97508	1.32964	2.51341	0.0450654	0.154568		1.86837	-0.53466	-1.4486	0.536758	0.958158
LOCUS_02050		complement(153998..154663)	4.26584	0.113333	1.08172	0.831961	0.9999		4.94184	0.332346	1.25906	0.555964	0.99997		4.05491	0.0551138	1.03894	0.924718	0.999997		8.87745	0.962413	1.94857	0.0153365	0.168591		5.79148	0.447303	1.36349	0.286679	0.989854		4.05045	-0.0960037	-1.06881	0.813548	0.99192		10.9936	1.17107	2.25178	0.00418176	0.0285238		4.61893	0.11189	1.08064	0.791862	0.982103
thiE		complement(154745..155383)	4.63432	0.417852	1.33594	0.435152	0.9999		4.7657	0.466973	1.38221	0.396567	0.99997		4.99885	0.541596	1.45558	0.338681	0.999997		7.09641	0.825217	1.7718	0.0440602	0.298527		3.55702	-0.0636436	-1.0451	0.886952	0.990545		3.42169	-0.199669	-1.14843	0.653975	0.991074		11.0042	1.35721	2.56189	0.000189476	0.00246286		5.19289	0.461352	1.37683	0.294324	0.920983
LOCUS_02070		complement(155380..156249)	4.48242	0.259551	1.19711	0.63873	0.9999		4.94651	0.414094	1.33246	0.41331	0.99997		3.95288	0.102809	1.07386	0.848809	0.999997		8.8395	1.04238	2.05962	0.0145298	0.165931		4.94403	0.317706	1.24635	0.48685	0.989854		6.04813	0.553565	1.46771	0.193071	0.991074		12.583	1.45144	2.73481	0.000403028	0.0046044		5.21104	0.369551	1.29195	0.38664	0.948039
LOCUS_02080		complement(156134..157273)	6.24862	0.0712332	1.05061	0.917331	0.9999		6.52754	0.177068	1.13058	0.771404	0.99997		6.35117	0.14716	1.10739	0.815798	0.999997		11.6532	0.813053	1.75693	0.0379028	0.277905		9.12078	0.571815	1.48639	0.170533	0.967354		10.4048	0.721771	1.6492	0.108983	0.991074		16.4217	1.20962	2.31276	0.00282262	0.0213105		8.76924	0.493179	1.40754	0.280101	0.920983
rsd		complement(157506..157982)	38.688	0.331573	1.25838	0.516568	0.9999		33.7195	0.159367	1.1168	0.749352	0.99997		38.1104	0.357416	1.28113	0.478329	0.999997		40.8474	0.221981	1.16633	0.545064	0.814929		34.5848	0.091229	1.06528	0.808496	0.990545		41.5753	0.320663	1.2489	0.410957	0.991074		47.1119	0.33126	1.25811	0.365722	0.563778		39.2047	0.25889	1.19656	0.529485	0.956492
LOCUS_02100		158077..158244	65.7402	0.201044	1.14953	0.697768	0.9999		56.4033	-0.231418	-1.17399	0.684561	0.99997		56.4033	-0.0448267	-1.03156	0.931513	0.999997		56.4033	-0.24905	-1.18842	0.517672	0.799639		56.4033	-0.449047	-1.36514	0.271687	0.989854		56.4033	-0.218268	-1.16334	0.648385	0.991074		56.4033	-0.482377	-1.39704	0.200304	0.394357		57.82	-0.0986674	-1.07078	0.81451	0.986322
LOCUS_02110		complement(158444..158650)	84.892	-0.114431	-1.08255	0.826979	0.9999		84.892	-0.219858	-1.16462	0.658469	0.99997		84.892	-0.240184	-1.18114	0.632996	0.999997		84.892	-0.422629	-1.34037	0.225574	0.594098		84.892	-0.349846	-1.27442	0.351092	0.989854		84.892	-0.226976	-1.17038	0.556896	0.991074		84.892	-0.59616	-1.51169	0.110381	0.272496		84.892	-0.253785	-1.19233	0.536757	0.958158
LOCUS_02120		158561..158848	64.4735	0.178996	1.1321	0.729202	0.9999		58.7867	0.0557273	1.03938	0.907625	0.99997		56.2541	-0.0569664	-1.04028	0.912912	0.999997		56.2541	-0.227234	-1.17059	0.513401	0.797719		60.2433	-0.0155224	-1.01082	0.966833	0.995885		67.667	0.114811	1.08283	0.760841	0.991074		67.1585	-0.0674484	-1.04786	0.856209	0.926913		64.0874	0.0545151	1.03851	0.886773	0.993691
LOCUS_02130		158888..159397	267.061	-0.00802206	-1.00558	0.98534	0.9999		266.075	-0.0564465	-1.0399	0.905304	0.99997		266.075	-0.0179449	-1.01252	0.969692	0.999997		266.075	-0.632098	-1.54982	0.0484479	0.3113		266.075	-0.34723	-1.27212	0.287264	0.989854		266.075	-0.285915	-1.21918	0.383527	0.991074		266.075	-0.649813	-1.56896	0.0558657	0.177097		266.075	-0.303821	-1.23441	0.368773	0.945774
LOCUS_02140		159397..159951	263.78	0.066768	1.04737	0.878743	0.9999		255.408	0.0201418	1.01406	0.964913	0.99997		253.662	0.0222848	1.01557	0.962646	0.999997		250.161	-0.476183	-1.39106	0.117005	0.454418		250.161	-0.315724	-1.24464	0.353434	0.989854		250.161	-0.193652	-1.14366	0.571918	0.991074		250.161	-0.576157	-1.49087	0.106678	0.266495		250.161	-0.248986	-1.18837	0.455717	0.955457
nfi		159961..160632	123.729	-0.0331306	-1.02323	0.934105	0.9999		123.729	-0.0473297	-1.03335	0.913071	0.99997		123.729	-0.0393107	-1.02762	0.925005	0.999997		123.729	-0.245718	-1.18568	0.544647	0.814785		130.399	-0.041673	-1.02931	0.877323	0.990545		142.387	0.0483197	1.03406	0.887256	0.99192		125.059	-0.30919	-1.23901	0.350752	0.549231		136.784	0.00947114	1.00659	0.972529	0.997777
yjaG		160675..161265	238.061	-0.0974705	-1.0699	0.817214	0.9999		238.061	-0.111327	-1.08022	0.802442	0.99997		238.061	-0.0878755	-1.0628	0.847036	0.999997		238.061	-0.295018	-1.2269	0.381278	0.718186		238.061	-0.196982	-1.1463	0.576293	0.990494		240.914	-0.138092	-1.10045	0.69152	0.991074		238.061	-0.598697	-1.51435	0.0863079	0.232336		241.204	-0.117205	-1.08463	0.735303	0.968441
hupA		161447..161719	2606.97	0.215551	1.16115	0.666234	0.9999		2379.08	0.0716862	1.05094	0.877315	0.99997		2395.7	0.10518	1.07563	0.839867	0.999997		2240.97	-0.460398	-1.37592	0.244034	0.611887		2240.97	-0.426105	-1.3436	0.284482	0.989854		2240.97	-0.344987	-1.27014	0.454298	0.991074		2240.97	-0.668621	-1.58955	0.13788	0.314104		2240.97	-0.31638	-1.2452	0.411025	0.948039
LOCUS_02180		161791..162261	204.67	-0.0198417	-1.01385	0.963264	0.9999		203.924	-0.0700066	-1.04972	0.868251	0.99997		203.924	-0.0296488	-1.02076	0.941698	0.999997		214.122	-0.137711	-1.10016	0.673576	0.880883		221.152	0.0173785	1.01212	0.946423	0.99363		244.017	0.124013	1.08976	0.636763	0.991074		226.327	-0.156946	-1.11492	0.581484	0.739051		234.417	0.0829579	1.05919	0.763254	0.973342
LOCUS_02190		162233..162424	56.9422	0.256984	1.19498	0.6597	0.9999		46.4827	-0.144678	-1.10548	0.814076	0.99997		49.4315	0.0978306	1.07016	0.861585	0.999997		64.7695	0.296621	1.22826	0.500379	0.793132		64.4698	0.395783	1.31566	0.389639	0.989854		69.1072	0.463509	1.37889	0.284896	0.991074		70.6643	0.32289	1.25083	0.412127	0.604701		57.9651	0.226167	1.16972	0.627685	0.964103
zraP		complement(162426..162845)	20.983	0.0804301	1.05733	0.914815	0.9999		19.439	-0.11631	-1.08396	0.874892	0.99997		19.439	-0.207195	-1.15444	0.790884	0.999997		31.2488	0.550957	1.46506	0.293944	0.651503		25.6267	0.379233	1.30065	0.47201	0.989854		33.5645	0.731893	1.66082	0.157516	0.991074		42.8053	0.904464	1.87185	0.0744282	0.212571		26.5942	0.405996	1.325	0.449202	0.955457
LOCUS_02210		163083..163919	10.8974	-0.407597	-1.32647	0.505017	0.9999		11.8858	0.12762	1.09249	0.798425	0.99997		10.8974	-0.0591257	-1.04183	0.915233	0.999997		13.4941	0.100316	1.07201	0.808646	0.937917		12.5259	0.0990464	1.07107	0.813379	0.990545		11.2583	-0.0892272	-1.0638	0.852032	0.99192		15.607	0.206019	1.1535	0.580012	0.738469		12.3801	0.0648238	1.04596	0.878963	0.993691
LOCUS_02220		163907..164467	7.10486	0.0134169	1.00934	0.980506	0.9999		7.08355	-0.502065	-1.41624	0.297076	0.99997		7.08355	-0.0840965	-1.06002	0.878322	0.999997		7.93915	-0.0477027	-1.03362	0.90425	0.970228		7.9714	0.0819374	1.05844	0.836038	0.990545		7.08355	-0.200456	-1.14906	0.623444	0.991074		9.93504	0.179729	1.13267	0.623312	0.77087		7.08355	-0.219351	-1.16421	0.598931	0.961553
LOCUS_02230		164454..165197	7.83529	-0.0577186	-1.04082	0.922076	0.9999		7.83529	-0.175238	-1.12915	0.757905	0.99997		7.83529	-0.204239	-1.15208	0.703307	0.999997		8.49374	-0.109049	-1.07852	0.785907	0.930435		7.83529	-0.193025	-1.14316	0.628549	0.990545		7.83529	-0.236751	-1.17834	0.574509	0.991074		12.0235	0.292403	1.22468	0.46262	0.648891		7.83529	-0.41211	-1.33063	0.320259	0.927355
LOCUS_02240		165194..165499	9.14118	-0.339339	-1.26518	0.534996	0.9999		9.14118	-0.217635	-1.16283	0.715158	0.99997		9.14118	-0.242738	-1.18324	0.681508	0.999997		11.1213	0.0605273	1.04285	0.874979	0.961709		9.16045	-0.108598	-1.07818	0.812045	0.990545		9.48829	-0.0958172	-1.06867	0.815295	0.99192		14.9544	0.387796	1.30839	0.282119	0.482812		9.14118	-0.197376	-1.14661	0.635343	0.964239
LOCUS_02250		165487..165777	22.0438	0.22373	1.16775	0.687669	0.9999		22.2073	0.237612	1.17904	0.672662	0.99997		21.9328	0.22692	1.17033	0.693864	0.999997		24.215	0.154108	1.11273	0.702412	0.89454		25.1294	0.316913	1.24566	0.420832	0.989854		25.1219	0.28439	1.2179	0.460598	0.991074		22.2988	-0.0637241	-1.04516	0.866256	0.932113		19.1908	-0.0821075	-1.05856	0.848151	0.993691
LOCUS_02260	purD_1	complement(165774..166349)	186.726	-0.200264	-1.14891	0.674349	0.9999		186.726	-0.0747609	-1.05319	0.862869	0.99997		186.726	-0.028322	-1.01983	0.950883	0.999997		186.726	-0.847266	-1.79909	0.0299823	0.244466		186.726	-0.377879	-1.29943	0.157611	0.952683		186.726	-0.337572	-1.26363	0.211594	0.991074		186.726	-1.29992	-2.46215	0.000118191	0.00165973		186.726	-0.587273	-1.5024	0.0228506	0.416411
LOCUS_02270	purD_2	complement(166349..166834)	170.704	-0.239301	-1.18042	0.579364	0.9999		170.704	-0.185624	-1.13731	0.649098	0.99997		170.704	-0.0361376	-1.02537	0.927974	0.999997		170.704	-1.08244	-2.11761	0.0031584	0.0632601		170.704	-0.403342	-1.32257	0.265075	0.989854		170.704	-0.369201	-1.29164	0.324369	0.991074		170.704	-1.46052	-2.75208	1.71553e-05	0.000322157		170.704	-0.599396	-1.51508	0.152344	0.838837
LOCUS_02280	purD_3	complement(166867..167061)	126.795	-0.184062	-1.13608	0.717047	0.9999		126.795	-0.22355	-1.1676	0.609151	0.99997		126.795	-0.0428538	-1.03015	0.924809	0.999997		126.795	-1.03447	-2.04836	0.0121834	0.151845		126.795	-0.495653	-1.40996	0.211362	0.987722		126.795	-0.536852	-1.4508	0.142187	0.991074		126.795	-1.50777	-2.84369	7.46732e-05	0.00111907		126.795	-0.734905	-1.66429	0.0505983	0.603871
purH		complement(167073..168476)	191.987	-0.21413	-1.16	0.642713	0.9999		191.987	-0.116375	-1.08401	0.78167	0.99997		191.987	-0.0308352	-1.0216	0.946472	0.999997		191.987	-0.922468	-1.89536	0.00998314	0.13448		191.987	-0.388514	-1.30904	0.234297	0.989854		191.987	-0.404855	-1.32396	0.318174	0.991074		191.987	-1.54392	-2.91587	2.46309e-05	0.000439845		191.987	-0.656366	-1.57611	0.0415933	0.55579
LOCUS_r00070		169276..170807	0	ND	ND	ND	ND		0	ND	ND	ND	ND		0.932782	6.98549	126.719	0.0214181	0.74018		0	ND	ND	ND	ND		0	ND	ND	ND	ND		1.13984	7.26098	153.382	0.0121938	0.532712		0.217842	4.74228	26.7651	0.118739	0.285338		0	ND	ND	ND	ND
LOCUS_t00080		170893..170967	0	ND	ND	ND	ND		0	ND	ND	ND	ND		0	ND	ND	ND	ND		0	ND	ND	ND	ND		0	ND	ND	ND	ND		0	ND	ND	ND	ND		0	ND	ND	ND	ND		0	ND	ND	ND	ND
LOCUS_r00080		171164..174056	1.93149	-1.237	-2.35707	0.0235356	0.9999		1.93149	-0.156366	-1.11448	0.817669	0.99997		25.2811	3.55168	11.7263	9.89106e-06	0.00106908		3.20961	0.507629	1.42171	0.274505	0.634987		1.99384	-0.0692857	-1.0492	0.861023	0.990545		57.8814	4.77072	27.298	5.27209e-09	5.36323e-06		57.6742	4.56404	23.6544	1.97275e-07	6.55552e-06		1.93149	-0.301891	-1.23276	0.468414	0.955457
LOCUS_r00090		174162..174272	0	ND	ND	ND	ND		0	ND	ND	ND	ND		0	ND	ND	ND	ND		0	ND	ND	ND	ND		0	ND	ND	ND	ND		0	ND	ND	ND	ND		0	ND	ND	ND	ND		0	ND	ND	ND	ND
LOCUS_02300		174351..174569	19.9538	0.0316473	1.02218	0.96338	0.9999		19.2848	-0.148933	-1.10875	0.816131	0.99997		19.2848	-0.21817	-1.16326	0.74935	0.999997		33.2871	0.636959	1.55505	0.183884	0.54482		25.0323	0.339279	1.26512	0.503153	0.989854		28.1601	0.470798	1.38588	0.363973	0.991074		31.1726	0.444787	1.36111	0.369873	0.568603		24.3949	0.279887	1.2141	0.578145	0.960549
LOCUS_02310		174554..174733	36.8636	0.391116	1.31141	0.56422	0.9999		27.7512	-0.140655	-1.10241	0.85087	0.99997		29.0679	0.0639485	1.04532	0.927345	0.999997		44.5546	0.53765	1.45161	0.271294	0.6311		40.8495	0.528151	1.44208	0.278563	0.989854		36.1571	0.313971	1.24312	0.535456	0.991074		51.7756	0.654633	1.57422	0.183283	0.372673		44.7463	0.633568	1.5514	0.208965	0.879463
LOCUS_02320	yjaB	complement(174761..175111)	39.6042	-0.0943315	-1.06757	0.906774	0.9999		39.6042	-0.0838895	-1.05987	0.912577	0.99997		39.6042	-0.0848929	-1.06061	0.917096	0.999997		83.3087	0.964083	1.95082	0.0957423	0.423796		58.5366	0.57116	1.48572	0.328769	0.989854		69.2714	0.777312	1.71393	0.170998	0.991074		110.49	1.27262	2.416	0.0333838	0.127004		58.6924	0.549271	1.46335	0.351369	0.937916
metA		175393..176322	21.1776	-0.0572806	-1.0405	0.933675	0.9999		21.1776	-0.0313296	-1.02195	0.959142	0.99997		21.1776	-0.188618	-1.13967	0.760413	0.999997		43.374	0.893114	1.85718	0.0489256	0.3113		30.6221	0.508683	1.42275	0.263369	0.989854		32.6703	0.566308	1.48073	0.234995	0.991074		60.5337	1.27534	2.42056	0.00187345	0.0154631		34.776	0.666611	1.58734	0.167917	0.852245
LOCUS_02340		176590..177993	5.47526	0.173653	1.12791	0.807517	0.9999		5.2942	0.195504	1.14512	0.739855	0.99997		5.12901	0.15052	1.10997	0.810937	0.999997		7.89999	0.56564	1.48004	0.17781	0.5377		5.67372	0.19809	1.14718	0.655553	0.990545		6.37666	0.31706	1.24579	0.438709	0.991074		10.8797	0.927672	1.9022	0.0184659	0.0837598		6.48571	0.369643	1.29203	0.42221	0.950116
LOCUS_02350		178008..178190	4.20892	1.60857	3.0495	0.0564189	0.9999		2.00488	0.507442	1.42153	0.622731	ND		1.78872	0.412331	1.33083	0.627378	0.999997		3.32097	1.06351	2.09001	0.147531	0.500397		3.99786	1.43624	2.70615	0.0523174	0.741237		4.3264	1.50935	2.84682	0.0603202	0.991074		7.05254	2.03734	4.10489	0.00332678	0.0239648		1.32954	-0.134415	-1.09765	0.882884	0.993691
LOCUS_02360		178205..178435	2.98819	1.2363	2.35593	0.130814	0.9999		2.98956	1.24518	2.37048	0.119367	ND		1.77155	0.511255	1.42529	0.518162	0.999997		3.50475	1.25821	2.39199	0.063048	0.351596		2.28371	0.759794	1.69325	0.326652	0.989854		2.13655	0.614674	1.53121	0.471308	ND		4.32388	1.45715	2.74566	0.0262609	0.107275		3.15415	1.19726	2.29303	0.110335	0.782565
aceA		178378..179523	5.16035	0.369622	1.29201	0.536687	0.9999		4.2231	0.104709	1.07528	0.860911	0.99997		4.99969	0.398085	1.31776	0.486339	0.999997		8.3032	0.908826	1.87752	0.0240328	0.215506		5.8124	0.50422	1.41836	0.203519	0.987722		5.9439	0.496246	1.41054	0.229786	0.991074		12.42	1.3894	2.6197	0.000524621	0.00570367		6.42815	0.629871	1.54743	0.102251	0.762855
LOCUS_02380		179648..180106	7.15449	0.361924	1.28514	0.547707	0.9999		6.28464	0.199465	1.14827	0.737714	0.99997		6.68112	0.258671	1.19638	0.680617	0.999997		10.7683	0.771709	1.70729	0.0905148	0.415585		7.34852	0.335922	1.26218	0.457033	0.989854		8.77335	0.553352	1.46749	0.224486	0.991074		14.0562	1.05717	2.08084	0.0146886	0.0710989		7.7592	0.389461	1.3099	0.430676	0.951393
LOCUS_02390		180106..181092	10.7313	0.0704529	1.05005	0.912815	0.9999		9.78469	-0.0446296	-1.03142	0.941696	0.99997		9.89547	-0.0285668	-1.02	0.964683	0.999997		15.4227	0.482212	1.39688	0.300204	0.658146		15.1412	0.568066	1.48253	0.180307	0.974301		18.4297	0.82195	1.76779	0.060541	0.991074		17.9597	0.605121	1.52111	0.162945	0.348166		14.8433	0.519096	1.43306	0.209571	0.881516
LOCUS_02400		181017..181370	52.3618	0.259715	1.19724	0.662798	0.9999		46.2909	0.127377	1.09231	0.811953	0.99997		42.5237	-0.013101	-1.00912	0.981588	0.999997		44.8451	-0.0948907	-1.06798	0.814146	0.940014		52.6487	0.245923	1.18585	0.563599	0.990494		66.5276	0.550193	1.46428	0.152771	0.991074		50.3177	-0.0269894	-1.01888	0.947764	0.974356		54.9897	0.289223	1.22198	0.503082	0.955457
LOCUS_02410		complement(181455..182210)	118.269	-0.0636715	-1.04512	0.872676	0.9999		118.269	-0.0606498	-1.04294	0.883463	0.99997		121.797	0.0358708	1.02518	0.926172	0.999997		118.269	-0.408895	-1.32767	0.296323	0.653741		119.519	-0.0957191	-1.0686	0.723266	0.990545		137.507	0.0692871	1.0492	0.822981	0.99192		118.269	-0.607517	-1.52364	0.0596846	0.184534		118.269	-0.147719	-1.10782	0.581346	0.960549
LOCUS_02420		182410..184797	21.7132	0.179555	1.13253	0.668652	0.9999		19.7018	0.0506543	1.03573	0.913275	0.99997		18.8874	0.0111297	1.00774	0.97923	0.999997		20.7842	-0.0939061	-1.06726	0.786432	0.930805		18.8874	-0.183197	-1.1354	0.61019	0.990545		21.0444	-0.0075555	-1.00525	0.984707	0.997314		22.9622	-0.0489087	-1.03448	0.890789	0.942716		20.2735	-0.0415861	-1.02924	0.896472	0.993691
LOCUS_02430		184794..185387	15.9331	0.215188	1.16086	0.715249	0.9999		14.2921	0.0690332	1.04901	0.904711	0.99997		13.5793	-0.0366285	-1.02571	0.94811	0.999997		15.4081	-0.0381557	-1.0268	0.928753	0.976424		13.5793	-0.258259	-1.19603	0.548291	0.989854		14.51	-0.0518336	-1.03658	0.899356	0.991929		20.2341	0.267586	1.20379	0.493697	0.675606		14.3118	-0.0382464	-1.02686	0.935535	0.995228
LOCUS_02440		185381..185596	14.0573	-0.10095	-1.07248	0.858668	0.9999		17.1037	0.273016	1.20833	0.556008	0.99997		16.3037	0.209673	1.15643	0.681761	0.999997		17.628	0.101003	1.07252	0.794892	0.933299		14.0573	-0.272172	-1.20762	0.512104	0.989854		14.0573	-0.196852	-1.14619	0.624155	0.991074		26.1918	0.571998	1.48658	0.122453	0.290692		16.492	0.0951248	1.06816	0.83328	0.990625
LOCUS_02450		185593..186090	15.4858	0.233881	1.17599	0.722024	0.9999		13.3656	0.0419042	1.02947	0.941361	0.99997		13.0229	-0.0246284	-1.01722	0.968465	0.999997		17.8168	0.231385	1.17396	0.591322	0.840997		13.0229	-0.162856	-1.1195	0.679025	0.990545		14.4795	0.00500279	1.00347	0.989912	0.998598		16.954	0.0690716	1.04904	0.867358	0.932464		14.3872	0.0218604	1.01527	0.958793	0.996002
LOCUS_02460		186270..186467	2.05081	-0.0139092	-1.00969	0.986612	0.9999		2.05081	-0.519164	-1.43312	0.598202	ND		2.06799	0.0124128	1.00864	0.987533	0.999997		2.25106	-0.0887577	-1.06345	0.901689	0.970228		2.05081	-1.07485	-2.1065	0.225895	0.989854		3.36227	0.547122	1.46117	0.450534	0.991074		2.05081	-1.24998	-2.37839	0.132102	0.305309		2.86247	0.3413	1.2669	0.65579	0.965182
LOCUS_02470		complement(187127..187318)	5.47769	-0.319241	-1.24767	0.629324	0.9999		5.47769	-0.22216	-1.16648	0.749618	0.99997		7.03579	0.352856	1.27709	0.574654	0.999997		5.4839	-0.223898	-1.16788	0.677059	0.882588		6.13755	0.0459673	1.03238	0.928807	0.992424		6.26754	0.0378681	1.0266	0.939266	0.996072		6.06787	-0.178767	-1.13192	0.725631	0.844268		6.53579	0.116666	1.08423	0.826431	0.988307
LOCUS_02480		187293..188753	9.81373	0.0408674	1.02873	0.937628	0.9999		9.4885	-0.0351561	-1.02467	0.944667	0.99997		9.99787	0.0721292	1.05127	0.887214	0.999997		10.3947	-0.0803492	-1.05727	0.826585	0.945583		11.0099	0.110288	1.07944	0.776738	0.990545		12.0185	0.206152	1.15361	0.562123	0.991074		11.7361	-0.00162216	-1.00113	0.996493	0.997321		11.4417	0.147833	1.1079	0.730364	0.968441
pepE		complement(188843..189532)	158.166	-0.064504	-1.04573	0.905434	0.9999		158.166	-0.0525175	-1.03707	0.916346	0.99997		158.166	-0.212823	-1.15895	0.663484	0.999997		158.166	-1.03984	-2.056	0.0192719	0.191194		158.166	-0.711089	-1.63704	0.0373063	0.648804		158.166	-0.820323	-1.7658	0.0431689	0.947433		158.166	-1.29182	-2.44836	0.00152381	0.0130566		158.166	-0.75419	-1.68668	0.0307427	0.48431
LOCUS_02500		complement(190135..190866)	2.4929	-0.294311	-1.2263	0.644453	0.9999		2.4929	-0.736035	-1.66559	0.250831	0.99997		2.4929	-0.229594	-1.17251	0.709542	0.999997		2.93306	0.012358	1.0086	0.976696	0.991665		3.05444	0.179587	1.13256	0.703879	0.990545		2.4929	-0.182002	-1.13446	0.719401	0.991074		3.63788	0.222535	1.16678	0.604729	0.756453		3.31718	0.279393	1.21368	0.567924	0.960549
LOCUS_02510		complement(191245..191973)	2.17219	0.621617	1.5386	0.360507	0.9999		1.38687	-0.254307	-1.19276	0.705031	ND		1.62838	0.223858	1.16785	0.718305	0.999997		3.05552	0.905738	1.8735	0.0706776	0.372912		2.45051	0.698971	1.62335	0.195923	0.987722		2.453	0.653031	1.57247	0.257862	0.991074		4.16639	1.25186	2.38149	0.00620212	0.0386739		2.22059	0.537696	1.45165	0.328027	0.93409
LOCUS_02520		complement(192022..192819)	1.42043	-0.234977	-1.17689	0.715259	0.9999		1.42043	-0.13162	-1.09552	0.846405	0.99997		1.42043	-0.541312	-1.4553	0.376962	0.999997		2.18118	0.390754	1.31108	0.420324	0.745598		1.47605	-0.0597186	-1.04226	0.906127	0.990767		1.42043	-0.598575	-1.51422	0.28472	0.991074		2.70996	0.602839	1.5187	0.166779	0.353003		1.52223	-0.0412245	-1.02899	0.948551	0.995228
LOCUS_02530		complement(193106..193375)	0.90366	-0.0138731	-1.00966	0.987998	0.9999		1.8041	0.965794	1.95314	0.228308	ND		0.901136	-2.31149	-4.96396	0.112852	0.999997		2.84898	1.39951	2.63811	0.0522807	0.322749		2.26258	1.21437	2.3204	0.185359	0.974608		1.39227	0.446989	1.36319	0.607076	ND		2.00216	0.799269	1.74022	0.260718	0.460733		2.39873	1.24415	2.36879	0.105567	0.771446
LOCUS_02540		complement(193375..193737)	2.23725	-1.30843	-2.47672	0.133956	0.9999		2.23725	-0.595347	-1.51084	0.44102	ND		2.23725	-0.542452	-1.45645	0.500958	0.999997		2.23725	-0.259958	-1.19744	0.702573	0.89454		2.23725	-0.299894	-1.23105	0.6407	0.990545		2.23725	-1.0721	-2.10249	0.132035	0.991074		2.23725	-0.414929	-1.33323	0.494361	0.676242		2.23725	-0.108622	-1.0782	0.861524	0.993691
LOCUS_02550		complement(193889..194596)	1.60391	-0.0357392	-1.02508	0.95789	0.9999		1.66537	0.0453598	1.03194	0.94412	0.99997		1.60391	-0.187433	-1.13874	0.766075	0.999997		2.00265	0.0966004	1.06925	0.855548	0.954496		1.60391	-0.453496	-1.36935	0.418998	0.989854		1.60391	-0.449695	-1.36575	0.412087	0.991074		3.34936	0.735472	1.66494	0.0791218	0.219741		1.71529	-0.0351201	-1.02464	0.951641	0.995228
LOCUS_02560		complement(194832..195611)	3.59507	0.0504587	1.03559	0.922303	0.9999		3.69203	0.108871	1.07838	0.845552	0.99997		3.42807	-0.319495	-1.24789	0.599869	0.999997		4.67491	0.223051	1.1672	0.565979	0.827567		3.42807	-0.199522	-1.14832	0.675479	0.990545		3.42807	-0.460151	-1.37569	0.281556	0.991074		5.33551	0.313878	1.24304	0.370934	0.5696		3.42807	-0.178348	-1.13159	0.658196	0.965182
LOCUS_02570		195957..196295	91.6343	-0.28331	-1.21698	0.555278	0.9999		91.6343	-0.318399	-1.24695	0.499542	0.99997		91.6343	-0.135713	-1.09864	0.778184	0.999997		91.6343	-0.878601	-1.83859	0.0304325	0.246202		91.6343	-0.720401	-1.64764	0.0753187	0.849394		91.6343	-0.532999	-1.44693	0.178471	0.991074		91.6343	-0.94844	-1.92979	0.0284511	0.113256		91.6343	-0.530317	-1.44425	0.155157	0.839597
LOCUS_02580		196322..196510	55.0911	0.114316	1.08246	0.834501	0.9999		53.0205	0.0698456	1.0496	0.890706	0.99997		54.3813	0.110707	1.07976	0.83072	0.999997		50.097	-0.572835	-1.48744	0.189214	0.550357		50.097	-0.319182	-1.24762	0.453493	0.989854		50.097	-0.20473	-1.15247	0.666399	0.991074		50.097	-0.746966	-1.67826	0.0678374	0.200662		50.097	-0.486595	-1.40113	0.277248	0.920983
LOCUS_02590		196453..196785	128.411	-0.183886	-1.13594	0.662513	0.9999		128.411	-0.130425	-1.09462	0.768177	0.99997		129.2	0.00501466	1.00348	0.990743	0.999997		128.411	-0.621293	-1.53825	0.083505	0.401081		128.411	-0.176182	-1.12989	0.614894	0.990545		135.887	-0.0734742	-1.05225	0.839966	0.99192		128.411	-0.632486	-1.55023	0.0240531	0.100788		128.411	-0.172367	-1.12691	0.609095	0.962359
LOCUS_02600		complement(196905..197066)	78.8035	-0.265538	-1.20208	0.583211	0.9999		86.4988	0.129175	1.09367	0.794707	0.99997		82.8643	0.0727105	1.05169	0.886294	0.999997		78.8035	-0.296215	-1.22792	0.485143	0.783223		80.5284	-0.0733716	-1.05217	0.835681	0.990545		100.624	0.204298	1.15213	0.585792	0.991074		78.8035	-0.435034	-1.35194	0.248808	0.448923		78.8035	-0.150465	-1.10993	0.683552	0.965584
LOCUS_02610		complement(197346..197831)	52.7471	0.275979	1.21082	0.534734	0.9999		42.9982	-0.0319852	-1.02242	0.94307	0.99997		46.596	0.128935	1.09349	0.785767	0.999997		51.0995	0.0246711	1.01725	0.944562	0.982365		42.9982	-0.136007	-1.09886	0.720402	0.990545		47.5035	-0.00868039	-1.00603	0.980137	0.997314		58.3993	0.117447	1.08481	0.774195	0.877247		47.6361	0.0132104	1.0092	0.972275	0.997777
LOCUS_02620		complement(197747..198694)	61.6048	0.187629	1.13889	0.648447	0.9999		53.9851	-0.00112657	-1.00078	0.997871	0.99997		54.5185	0.0332978	1.02335	0.941464	0.999997		58.5427	-0.111	-1.07998	0.737014	0.909342		53.722	-0.301505	-1.23243	0.401501	0.989854		54.495	-0.15118	-1.11048	0.684275	0.991074		60.4872	-0.16407	-1.12044	0.640646	0.783673		53.722	-0.1629	-1.11954	0.604978	0.962359
LOCUS_02630		199359..199802	581.559	0.0329034	1.02307	0.951617	0.9999		570.128	-0.0788484	-1.05617	0.872587	0.99997		570.128	-0.122025	-1.08826	0.812591	0.999997		570.128	-0.937326	-1.91498	0.0251312	0.221977		570.128	-0.87096	-1.82888	0.0305635	0.582833		570.128	-0.880525	-1.84105	0.0364031	0.900092		570.128	-1.15072	-2.22025	0.00716752	0.0428984		570.128	-0.919764	-1.89181	0.0222335	0.409787
LOCUS_02640		199859..200668	619.055	0.0346956	1.02434	0.948891	0.9999		619.752	0.00941478	1.00655	0.98546	0.99997		605.874	-0.02691	-1.01883	0.959926	0.999997		605.874	-0.744637	-1.67555	0.065057	0.356298		605.874	-0.638318	-1.55651	0.111358	0.927511		605.874	-0.676141	-1.59786	0.110148	0.991074		605.874	-0.933966	-1.91052	0.0355282	0.131753		605.874	-0.713762	-1.64008	0.0678846	0.673357
LOCUS_02650		200665..200862	321.004	-0.00891129	-1.0062	0.9871	0.9999		319.758	-0.0297674	-1.02085	0.95711	0.99997		319.758	-0.153289	-1.1121	0.777557	0.999997		319.758	-0.762162	-1.69603	0.0445298	0.298766		319.758	-0.690696	-1.61406	0.0837862	0.878136		319.758	-0.716742	-1.64347	0.058329	0.991074		319.758	-0.935367	-1.91238	0.0188529	0.0850721		319.758	-0.668839	-1.58979	0.0875256	0.735078
LOCUS_02660		201716..202354	2.03106	0.397013	1.31678	0.527417	0.9999		2.66857	0.796339	1.73669	0.196353	0.99997		5.38185	1.80967	3.50562	0.00114899	0.0625414		3.16997	0.828117	1.77537	0.0994499	0.429618		1.77913	0.110842	1.07986	0.833759	0.990545		1.81747	0.102821	1.07387	0.830689	0.99192		2.99358	0.647586	1.56654	0.215278	0.412166		2.2164	0.405809	1.32483	0.483513	0.955457
LOCUS_02670		202743..203087	1.76704	0.87264	1.83101	0.280217	0.9999		1.53309	0.677335	1.59918	0.42339	ND		3.55985	1.88686	3.69831	0.0159376	0.582532		2.58305	1.20815	2.31041	0.0616389	0.349968		1.41551	0.473283	1.38827	0.554844	0.989854		1.0805	0.0466718	1.03288	0.95186	ND		4.46391	1.89052	3.70769	0.00362296	0.0256154		2.93394	1.49764	2.82379	0.0444069	0.574908
LOCUS_02680		203291..203584	3.03362	0.353257	1.27744	0.643115	0.9999		2.76492	0.226574	1.17005	0.758885	ND		5.84467	1.30447	2.46994	0.0566427	0.999997		3.85137	0.512863	1.42688	0.447835	0.762403		3.17901	0.321632	1.24974	0.604337	0.990545		2.94666	0.199	1.1479	0.763528	0.991074		8.77306	1.56785	2.96462	0.00126994	0.011419		4.81832	0.897183	1.86243	0.11318	0.788161
LOCUS_02690		203877..205178	5.01397	0.0746985	1.05314	0.90561	0.9999		5.4309	0.208342	1.15536	0.720867	0.99997		7.88831	0.751482	1.68352	0.18058	0.999997		6.81223	0.32904	1.25618	0.456983	0.768513		6.86312	0.449388	1.36546	0.310607	0.989854		6.8109	0.400598	1.32005	0.322043	0.991074		8.62511	0.577025	1.49177	0.167488	0.353923		6.59003	0.372619	1.2947	0.404424	0.948039
psiE		205737..206123	18.1666	1.09571	2.13719	0.127129	0.9999		8.19124	0.0409169	1.02877	0.939229	0.99997		9.29685	0.19631	1.14576	0.739355	0.999997		14.0221	0.595094	1.51057	0.142075	0.49326		10.07	0.245951	1.18587	0.582443	0.990494		16.0711	0.862742	1.81849	0.0521377	0.991074		17.6347	0.824648	1.7711	0.0483418	0.160927		11.1901	0.364698	1.28761	0.390476	0.948039
malG		complement(206215..207105)	359.775	1.73441	3.32744	5.01564e-05	0.00709156		191.056	0.895487	1.86024	0.0997237	0.99997		117.431	0.140282	1.10212	0.745211	0.999997		131.716	0.0866221	1.06188	0.81926	0.942075		105.014	-0.686724	-1.60962	0.0399288	0.669905		125.598	0.0811253	1.05784	0.778186	0.99185		105.014	-0.773276	-1.70915	0.0242408	0.101352		105.014	-0.522186	-1.43613	0.100336	0.757873
LOCUS_02720		complement(207185..207895)	237.512	1.70484	3.25994	0.000187621	0.0213804		116.189	0.754193	1.68669	0.170813	0.99997		73.1258	0.040528	1.02849	0.927811	0.999997		84.5536	0.028292	1.0198	0.945128	0.982713		70.2951	-0.711592	-1.63761	0.0578343	0.771386		83.0914	0.066662	1.04729	0.849028	0.99192		70.2951	-1.04644	-2.06543	0.000677989	0.00693443		70.2951	-0.730499	-1.65921	0.0346321	0.517422
LOCUS_02730		complement(207910..208608)	312.994	1.5665	2.96185	0.00057652	0.0530328		170.437	0.763289	1.69736	0.12888	0.99997		102.825	-0.00105859	-1.00073	0.998183	0.999997		116.654	-0.0552275	-1.03902	0.908685	0.970415		102.825	-0.82444	-1.77085	0.0304412	0.582833		110.685	-0.0681823	-1.04839	0.850034	0.99192		102.825	-1.33589	-2.52431	0.000220461	0.00282241		102.825	-0.886779	-1.84904	0.0122355	0.295349
malE		complement(208815..210005)	1167.86	1.48643	2.80195	0.00347332	0.259988		819.194	1.01303	2.01814	0.0840253	0.99997		530.459	0.347346	1.27222	0.534496	0.999997		415.436	-0.258497	-1.19623	0.599118	0.845292		409.624	-1.20372	-2.30333	0.00558017	0.191356		409.624	-0.322679	-1.25065	0.510006	0.991074		409.624	-1.4083	-2.65424	0.00196681	0.0160774		409.624	-1.28345	-2.4342	0.00226805	0.078211
LOCUS_02750		210366..210692	425.416	0.841404	1.79179	0.166629	0.9999		251.245	0.11494	1.08293	0.866553	0.99997		248.171	0.141234	1.10285	0.840471	0.999997		229.475	-1.78815	-3.45372	0.00271573	0.0570176		229.475	-1.52376	-2.8754	0.00284769	0.103792		229.475	-1.75019	-3.36402	0.0012782	0.135851		229.475	-2.95213	-7.73892	1.31537e-08	5.58521e-07		229.475	-1.60506	-3.04209	0.00641269	0.187446
LOCUS_02760		210689..211480	418.989	1.23901	2.36036	0.010324	0.635676		226.483	0.406884	1.32582	0.499281	0.99997		196.867	0.224169	1.1681	0.698485	0.999997		170.967	-0.955644	-1.93945	0.056101	0.331486		170.967	-1.43208	-2.69836	0.000146221	0.0073877		170.967	-0.852382	-1.80548	0.0427258	0.947433		170.967	-2.41468	-5.33202	1.16332e-08	4.99508e-07		170.967	-1.47525	-2.78032	0.000213388	0.00985666
LOCUS_02770	lamB	211551..212153	1206.54	1.8333	3.56351	0.000274939	0.028367		788.344	1.26374	2.40117	0.0305428	0.99997		448.819	0.394952	1.3149	0.385864	0.999997		417.876	0.0628574	1.04453	0.887546	0.966071		334.98	-0.940239	-1.91885	0.0149539	0.377766		403.225	0.0761546	1.0542	0.859004	0.99192		334.98	-1.14915	-2.21783	0.00294401	0.0218669		334.98	-0.807364	-1.75001	0.0315899	0.491445
LOCUS_02780		212144..212890	1451.38	1.83269	3.562	8.37562e-05	0.010658		927.873	1.23431	2.35269	0.0344952	0.99997		526.661	0.354269	1.27834	0.484913	0.999997		520.625	0.117486	1.08484	0.790462	0.932457		403.625	-0.968254	-1.95647	0.00796146	0.245198		521.507	0.18351	1.13564	0.64262	0.991074		403.625	-1.02469	-2.03453	0.00519502	0.0337059		403.625	-0.829292	-1.77681	0.0144865	0.32359
LOCUS_02790	malM	213167..214042	569.824	1.6269	3.0885	0.00083002	0.0723492		292.465	0.735197	1.66462	0.0952938	0.99997		201.71	0.16526	1.12137	0.702756	0.999997		205.066	-0.0382178	-1.02684	0.924364	0.975218		178.296	-0.783212	-1.72096	0.024857	0.519954		207.295	0.0422451	1.02972	0.908561	0.991929		178.296	-0.890072	-1.85327	0.012676	0.0642033		178.296	-0.521339	-1.43529	0.143658	0.831876
ubiC		214219..214716	98.1595	0.336684	1.26285	0.451	0.9999		80.1446	0.101709	1.07304	0.791528	0.99997		75.8706	0.0287687	1.02014	0.944186	0.999997		78.0812	-0.15208	-1.11117	0.678385	0.883693		74.2487	-0.191111	-1.14164	0.541552	0.989854		91.8931	0.154547	1.11307	0.641934	0.991074		76.3104	-0.286744	-1.21988	0.330294	0.53077		89.6497	0.137373	1.0999	0.655995	0.965182
ubiA		214728..215600	70.8808	0.249587	1.18887	0.586524	0.9999		56.6407	-0.0449214	-1.03163	0.919717	0.99997		56.6407	-0.0175517	-1.01224	0.96752	0.999997		58.7906	-0.171574	-1.12629	0.595057	0.843453		56.6407	-0.160297	-1.11752	0.650497	0.990545		70.6044	0.163774	1.12021	0.615389	0.991074		62.4546	-0.186389	-1.13791	0.619259	0.767654		66.7626	0.101591	1.07296	0.748531	0.970251
LOCUS_02820		complement(215753..215956)	193.932	-0.119532	-1.08638	0.774462	0.9999		193.932	-0.123714	-1.08954	0.740497	0.99997		215.293	0.14513	1.10583	0.735519	0.999997		193.932	-0.2459	-1.18583	0.485501	0.78332		193.932	-0.193841	-1.1438	0.515146	0.989854		211.269	-0.0313094	-1.02194	0.92496	0.995435		193.932	-0.403679	-1.32288	0.153062	0.33522		198.002	-0.106588	-1.07668	0.727103	0.968306
LOCUS_02830		complement(215893..217203)	274.513	-0.0509644	-1.03596	0.913596	0.9999		274.513	-0.110587	-1.07967	0.808146	0.99997		311.772	0.171648	1.12634	0.731057	0.999997		274.513	-0.363111	-1.2862	0.293293	0.65077		274.513	-0.158182	-1.11588	0.656892	0.990545		281.743	-0.138326	-1.10063	0.707175	0.991074		274.513	-0.576762	-1.4915	0.0807885	0.223012		274.513	-0.207302	-1.15453	0.562133	0.960549
LOCUS_02840		complement(217170..217421)	258.37	0.0506235	1.03571	0.918364	0.9999		245.464	-0.15154	-1.11075	0.764659	0.99997		286.385	0.211285	1.15772	0.635812	0.999997		245.464	-0.263373	-1.20028	0.463284	0.771467		245.464	-0.14891	-1.10873	0.68555	0.990545		265.291	-0.0566657	-1.04006	0.841234	0.99192		245.464	-0.451708	-1.36766	0.175987	0.36329		245.464	-0.21135	-1.15777	0.58549	0.960549
LOCUS_02850		complement(217421..217756)	284.173	-0.0112243	-1.00781	0.977429	0.9999		284.224	-0.00983172	-1.00684	0.980829	0.99997		325.297	0.193816	1.14379	0.647204	0.999997		281.789	-0.300023	-1.23116	0.41332	0.741742		305.756	-0.0197936	-1.01381	0.940348	0.99361		298.049	-0.0917945	-1.06569	0.747531	0.991074		281.789	-0.486415	-1.40096	0.178842	0.366851		281.789	-0.168293	-1.12373	0.515386	0.955457
LOCUS_02860		complement(217753..218214)	333.42	-0.0120767	-1.00841	0.978506	0.9999		332.005	-0.0444835	-1.03131	0.920786	0.99997		378.439	0.177114	1.13062	0.696904	0.999997		332.005	-0.296045	-1.22777	0.398328	0.730141		361.895	-0.00929234	-1.00646	0.978496	0.996484		348.424	-0.102596	-1.0737	0.775261	0.991234		332.005	-0.593487	-1.50889	0.0925602	0.243273		335.543	-0.134304	-1.09756	0.688045	0.965584
LOCUS_02870		218341..218709	249.486	1.48144	2.79228	0.00571597	0.39674		188.389	1.06512	2.09235	0.0191211	0.99997		140.239	0.666968	1.58773	0.163912	0.999997		89.3468	-0.523422	-1.43736	0.158872	0.514315		89.3468	-0.411409	-1.32998	0.266339	0.989854		89.3468	-0.474095	-1.38905	0.225146	0.991074		89.3468	-0.644419	-1.56311	0.0961563	0.250059		89.3468	-0.299073	-1.23035	0.482078	0.955457
lexA		218848..219552	648.75	0.288976	1.22177	0.554461	0.9999		567.116	0.111314	1.08021	0.814645	0.99997		591.606	0.161398	1.11837	0.755678	0.999997		626.542	0.0591144	1.04183	0.878071	0.962721		723.861	0.379594	1.30098	0.313931	0.989854		729.024	0.359531	1.28301	0.3724	0.991074		551.224	-0.221563	-1.166	0.592995	0.747404		719.992	0.351995	1.27632	0.337235	0.93719
LOCUS_02890		219549..220823	60.8967	0.0980085	1.0703	0.807403	0.9999		60.1833	0.0962223	1.06897	0.822412	0.99997		56.0669	-0.00769865	-1.00535	0.98668	0.999997		78.6375	0.273737	1.20894	0.484926	0.783223		66.3566	0.136714	1.0994	0.682515	0.990545		65.5724	0.0825454	1.05888	0.821065	0.99192		82.4785	0.244202	1.18444	0.477774	0.662282		65.5489	0.102119	1.07335	0.782811	0.981364
yjbJ		220939..221148	59.9111	0.0732821	1.05211	0.902476	0.9999		55.2706	-0.0862968	-1.06164	0.882824	0.99997		62.9016	0.190082	1.14083	0.726645	0.999997		83.8627	0.43353	1.35053	0.310628	0.667942		77.3298	0.427479	1.34488	0.345601	0.989854		97.8296	0.743869	1.67466	0.0943489	0.991074		84.6608	0.352377	1.27666	0.430012	0.619409		79.9787	0.45733	1.373	0.297225	0.920983
zur		complement(221190..221705)	171.047	-0.0500592	-1.03531	0.910766	0.9999		171.047	-0.0420926	-1.02961	0.927891	0.99997		172.52	0.0202667	1.01415	0.962307	0.999997		207.995	0.0997877	1.07162	0.78832	0.931899		215.769	0.266814	1.20315	0.37519	0.989854		247.421	0.43056	1.34776	0.155412	0.991074		182.925	-0.181105	-1.13375	0.640961	0.783819		222.048	0.286975	1.22008	0.365848	0.945566
LOCUS_02920		221860..222147	184.82	-0.21875	-1.16372	0.603599	0.9999		184.82	-0.116363	-1.084	0.783649	0.99997		184.82	-0.119413	-1.08629	0.786592	0.999997		205.489	-0.0688267	-1.04886	0.822294	0.943655		184.82	-0.197862	-1.147	0.522592	0.989854		207.209	0.0146724	1.01022	0.963078	0.996668		247.472	0.0997503	1.07159	0.735394	0.851867		213.606	0.0765294	1.05448	0.821002	0.987393
LOCUS_02930		222171..222776	173.587	-0.200049	-1.14874	0.66633	0.9999		173.587	-0.161742	-1.11864	0.718056	0.99997		173.587	-0.137452	-1.09996	0.749522	0.999997		190.924	-0.0731403	-1.052	0.803747	0.936768		179.83	-0.0540853	-1.0382	0.843806	0.990545		217.607	0.184338	1.1363	0.486685	0.991074		232.613	0.110162	1.07935	0.738417	0.853616		178.452	-0.0823262	-1.05872	0.77579	0.980326
pspG		223022..223228	28.3311	0.258862	1.19653	0.69918	0.9999		24.5432	0.11945	1.08632	0.845388	0.99997		24.2913	0.0672368	1.04771	0.915727	0.999997		45.5927	0.819558	1.76486	0.073817	0.380541		30.0178	0.328273	1.25551	0.463457	0.989854		33.6527	0.45733	1.373	0.320375	0.991074		60.5296	1.13057	2.18945	0.0141639	0.069394		31.0886	0.357765	1.28144	0.434494	0.952796
LOCUS_02950		complement(223390..223671)	45.8292	0.039539	1.02779	0.939245	0.9999		45.4825	0.0396023	1.02783	0.93827	0.99997		44.1085	-0.263824	-1.20066	0.570455	0.999997		50.727	-0.014229	-1.00991	0.970587	0.989649		49.8811	0.0757178	1.05389	0.846486	0.990545		48.5151	-0.0120877	-1.00841	0.974729	0.997314		51.1954	-0.106121	-1.07633	0.778772	0.88067		55.1238	0.197922	1.14705	0.621839	0.963951
LOCUS_02960		complement(223671..224372)	35.4757	0.181385	1.13397	0.691332	0.9999		33.1675	0.0893856	1.06392	0.846664	0.99997		32.4997	0.0741358	1.05273	0.880543	0.999997		31.3768	-0.304411	-1.23491	0.413005	0.741742		31.3768	-0.25471	-1.1931	0.49616	0.989854		31.3768	-0.253175	-1.19183	0.463159	0.991074		31.3768	-0.39639	-1.31621	0.180143	0.368345		31.3768	-0.273889	-1.20906	0.442993	0.955457
LOCUS_02970		complement(224477..226513)	11.7805	0.06909	1.04905	0.881991	0.9999		12.2092	0.150189	1.10971	0.745778	0.99997		11.1277	0.0203416	1.0142	0.966525	0.999997		15.8612	0.329292	1.2564	0.372194	0.710905		14.8168	0.339798	1.26558	0.352048	0.989854		15.7973	0.396258	1.31609	0.304431	0.991074		17.1598	0.34411	1.26937	0.335613	0.534506		16.253	0.454729	1.37053	0.196563	0.867775
LOCUS_02980		complement(226524..227264)	11.3885	-0.168933	-1.12423	0.799602	0.9999		11.3885	-0.113948	-1.08219	0.853527	0.99997		11.3885	-0.215891	-1.16142	0.729474	0.999997		12.4015	-0.0571872	-1.04044	0.897253	0.969396		13.5436	0.185135	1.13692	0.683032	0.990545		13.4963	0.14361	1.10467	0.765383	0.991074		13.9863	0.0199475	1.01392	0.962505	0.981446		16.6584	0.459842	1.37539	0.31757	0.927219
LOCUS_02990		complement(227261..227677)	5.54781	-0.0137069	-1.00955	0.980674	0.9999		5.54197	-0.19348	-1.14352	0.730335	0.99997		5.54197	-0.0925993	-1.06629	0.870615	0.999997		8.15577	0.334759	1.26117	0.399127	0.730554		6.72835	0.183343	1.13551	0.709347	0.990545		7.06335	0.199079	1.14797	0.625184	0.991074		8.78168	0.341171	1.26678	0.420413	0.612625		7.95922	0.389223	1.30969	0.361235	0.942839
LOCUS_03000		complement(227670..228608)	3.19777	-0.214916	-1.16064	0.717985	0.9999		3.19777	-0.0810603	-1.0578	0.890236	0.99997		3.96404	0.315622	1.24455	0.568646	0.999997		5.305	0.537438	1.45139	0.184198	0.54482		3.84863	0.189635	1.14048	0.666228	0.990545		4.50553	0.377024	1.29866	0.36903	0.991074		4.69699	0.263855	1.20068	0.506568	0.686959		3.87898	0.180919	1.13361	0.70859	0.966083
LOCUS_03010		complement(228642..228827)	1.52907	-0.227959	-1.17118	0.81344	0.9999		1.52907	-1.69344	-3.23428	0.168839	ND		1.5391	0.0119166	1.00829	0.989557	0.999997		2.38903	0.447591	1.36376	0.626034	0.857337		1.9681	0.241941	1.18258	0.778186	0.990545		2.4614	0.515699	1.42969	0.528446	ND		3.80466	0.966158	1.95363	0.159681	0.344179		3.26393	0.93861	1.91668	0.214199	0.887421
LOCUS_03020		complement(228824..230170)	3.00874	-0.179902	-1.13281	0.737428	0.9999		3.2859	0.119944	1.08669	0.827279	0.99997		3.46398	0.20152	1.14991	0.724193	0.999997		4.33116	0.302685	1.23344	0.401776	0.73382		3.56164	0.141158	1.10279	0.726215	0.990545		3.04961	-0.130881	-1.09496	0.743374	0.991074		4.54133	0.271584	1.20713	0.483226	0.667262		4.17707	0.340673	1.26635	0.419944	0.948213
LOCUS_03030		230468..231457	86.8328	-0.150697	-1.11011	0.707128	0.9999		86.8328	-0.0545231	-1.03852	0.901652	0.99997		86.8328	-0.0841885	-1.06009	0.829177	0.999997		88.3411	-0.204323	-1.15215	0.5956	0.843453		91.898	-0.0411097	-1.0289	0.881278	0.990545		86.8328	-0.178717	-1.13188	0.623216	0.991074		86.8328	-0.420195	-1.33811	0.221053	0.418551		95.3036	-0.00620218	-1.00431	0.981705	0.997777
LOCUS_03040		231529..231927	283.024	-0.0438095	-1.03083	0.922112	0.9999		283.024	-0.0296036	-1.02073	0.944887	0.99997		283.024	-0.0538136	-1.03801	0.90588	0.999997		283.024	-0.304823	-1.23527	0.295163	0.652916		284.437	-0.106838	-1.07687	0.720985	0.990545		295.544	-0.0896642	-1.06412	0.731751	0.991074		283.024	-0.46217	-1.37761	0.0807541	0.223012		293.477	-0.0806473	-1.05749	0.780539	0.981364
LOCUS_03050		231902..232234	244.573	-0.0753928	-1.05365	0.846303	0.9999		244.573	-0.0414138	-1.02912	0.917122	0.99997		244.573	-0.17523	-1.12914	0.680043	0.999997		244.573	-0.333938	-1.26045	0.404677	0.735952		250.405	-0.0834278	-1.05953	0.781365	0.990545		254.182	-0.0997075	-1.07156	0.784563	0.99192		244.573	-0.422246	-1.34001	0.198438	0.3917		251.616	-0.0952528	-1.06825	0.750041	0.970278
LOCUS_03060		232248..232940	217.995	-0.105247	-1.07568	0.812245	0.9999		217.995	-0.125916	-1.0912	0.780667	0.99997		217.995	-0.12894	-1.09349	0.777426	0.999997		217.995	-0.304657	-1.23512	0.370169	0.710605		226.148	-0.0565772	-1.04	0.873959	0.990545		231.754	-0.0598853	-1.04238	0.866427	0.99192		217.995	-0.482796	-1.39745	0.171666	0.359562		224.51	-0.0865722	-1.06184	0.791926	0.982103
LOCUS_03070		232993..233163	163.094	0.117077	1.08454	0.801704	0.9999		149.831	-0.0256589	-1.01794	0.954744	0.99997		160.369	0.114954	1.08294	0.792402	0.999997		153.235	-0.168746	-1.12408	0.663088	0.875756		181.992	0.189191	1.14012	0.624112	0.990545		157.688	-0.0552875	-1.03907	0.883214	0.99192		149.831	-0.468086	-1.38327	0.232257	0.43086		169.248	0.0674623	1.04787	0.855162	0.993691
LOCUS_03080		233285..234070	218.959	-0.0813452	-1.058	0.85719	0.9999		218.959	-0.0118738	-1.00826	0.976618	0.99997		218.959	-0.0509015	-1.03591	0.905839	0.999997		238.947	-0.0773981	-1.05511	0.833011	0.946632		257.379	0.140066	1.10196	0.666858	0.990545		261.474	0.12637	1.09154	0.738626	0.991074		221.272	-0.285931	-1.2192	0.397341	0.591753		255.931	0.113681	1.08199	0.742845	0.968441
LOCUS_03090		234644..235288	51.9163	-0.05709	-1.04037	0.91438	0.9999		51.9163	-0.128067	-1.09283	0.822489	0.99997		51.9163	-0.191394	-1.14187	0.731384	0.999997		66.5952	0.199418	1.14823	0.645961	0.868251		65.9206	0.299325	1.23057	0.441883	0.989854		73.3318	0.418554	1.33659	0.315939	0.991074		67.7465	0.128627	1.09325	0.730593	0.848105		67.2053	0.306133	1.23639	0.423895	0.950116
LOCUS_03100		235303..235647	40.3404	-0.0157918	-1.01101	0.980364	0.9999		40.0116	-0.169017	-1.12429	0.786307	0.99997		40.6393	0.0102487	1.00713	0.986922	0.999997		65.924	0.56499	1.47938	0.244557	0.612257		59.0805	0.523292	1.43723	0.256382	0.989854		60.9613	0.537154	1.45111	0.241606	0.991074		64.539	0.441418	1.35794	0.327495	0.528378		60.4138	0.534384	1.44832	0.254001	0.904648
LOCUS_03110		235811..236227	64.7463	0.0778559	1.05545	0.861826	0.9999		62.806	0.0459014	1.03233	0.917759	0.99997		63.3196	0.0645963	1.04579	0.880102	0.999997		63.3248	-0.157391	-1.11527	0.677026	0.882588		67.136	0.0365367	1.02565	0.919019	0.991829		70.8177	0.0777842	1.0554	0.83702	0.99192		70.6505	-0.0989238	-1.07097	0.809455	0.897268		75.2268	0.184431	1.13637	0.602461	0.962359
LOCUS_03120		236197..236919	51.5264	0.0482189	1.03399	0.912256	0.9999		49.2454	-0.070042	-1.04975	0.863995	0.99997		49.2454	-0.208777	-1.15571	0.638459	0.999997		55.012	-0.0633247	-1.04487	0.859349	0.956083		49.2454	-0.204619	-1.15238	0.517486	0.989854		49.2454	-0.155067	-1.11347	0.573853	0.991074		54.2606	-0.182339	-1.13472	0.523157	0.698875		53.7997	-0.00531238	-1.00369	0.986002	0.997777
LOCUS_03130		237100..237237	11.4451	-0.211034	-1.15752	0.741912	0.9999		11.4451	-0.518448	-1.43241	0.445322	0.99997		11.4451	-0.463005	-1.37841	0.480272	0.999997		11.4451	-0.338216	-1.26419	0.481551	0.781634		11.775	-0.0733934	-1.05219	0.8845	0.990545		16.5498	0.375781	1.29754	0.42194	0.991074		18.681	0.38059	1.30187	0.391023	0.585768		14.3713	0.192967	1.14311	0.6864	0.965584
LOCUS_03140		237427..237750	2.8645	0.0690578	1.04903	0.93496	0.9999		2.50146	-0.41422	-1.33258	0.542461	ND		2.50146	-0.219302	-1.16417	0.750762	0.999997		4.12695	0.492282	1.40667	0.328819	0.6771		3.62897	0.410751	1.32938	0.54117	0.989854		2.67382	-0.0483841	-1.03411	0.937358	0.996072		6.03744	0.93838	1.91637	0.0758188	0.214147		2.50146	-0.451776	-1.36772	0.421455	0.950116
LOCUS_03150		237783..239840	8.86803	0.159452	1.11686	0.805629	0.9999		7.8534	-0.014405	-1.01003	0.980919	0.99997		7.88641	0.00936141	1.00651	0.988081	0.999997		12.9266	0.575759	1.49046	0.227757	0.596935		10.7566	0.428085	1.34545	0.345077	0.989854		13.4967	0.718337	1.64528	0.118018	0.991074		15.4675	0.737651	1.66746	0.100564	0.256803		11.4652	0.494471	1.4088	0.293546	0.920983
LOCUS_03160		239873..240562	2.17348	-0.518619	-1.43258	0.439267	0.9999		2.35367	0.107249	1.07717	0.860252	0.99997		2.90523	0.414748	1.33307	0.486379	0.999997		3.23057	0.345964	1.271	0.433775	0.752166		2.5307	0.106205	1.07639	0.838491	0.990545		2.88841	0.256253	1.19437	0.612423	0.991074		4.64245	0.768643	1.70367	0.063307	0.192159		2.52265	0.0815212	1.05813	0.871853	0.993691
LOCUS_03170		240562..241026	4.35193	0.127604	1.09248	0.836277	0.9999		3.83502	-0.215379	-1.16101	0.722959	0.99997		3.83502	-0.687284	-1.61025	0.297951	0.999997		4.26759	-0.0685007	-1.04863	0.871194	0.961483		4.5436	0.130678	1.09481	0.775722	0.990545		3.83502	-0.289942	-1.22259	0.580784	0.991074		4.74361	-0.016521	-1.01152	0.967379	0.983594		4.70043	0.159998	1.11729	0.737863	0.968441
LOCUS_03180		241051..242451	3.73036	-0.00684433	-1.00476	0.990821	0.9999		3.65317	-0.00339341	-1.00235	0.995263	0.99997		3.85821	0.099103	1.07111	0.854299	0.999997		6.18696	0.541235	1.45522	0.178034	0.537833		5.97344	0.600172	1.5159	0.144061	0.948559		3.64582	-0.311559	-1.24105	0.452896	0.991074		6.70872	0.571349	1.48591	0.162431	0.347845		6.41396	0.684971	1.60767	0.114158	0.791336
sucC_1		242473..243642	7.19827	-0.0795485	-1.05669	0.895436	0.9999		7.21549	-0.00453403	-1.00315	0.993681	0.99997		7.19827	-0.329877	-1.25691	0.560874	0.999997		12.1867	0.534092	1.44803	0.217419	0.587161		11.9799	0.618588	1.53537	0.127162	0.931229		7.19827	-0.343071	-1.26845	0.415721	0.991074		11.9121	0.401992	1.32133	0.267157	0.467036		12.0039	0.60227	1.5181	0.135287	0.831876
LOCUS_03200		243655..243825	4.99591	-0.0142376	-1.00992	0.983815	0.9999		9.03064	0.842125	1.79269	0.208602	0.99997		5.02505	0.0114437	1.00796	0.986286	0.999997		10.1867	0.801364	1.74275	0.148077	0.500397		7.13273	0.399141	1.31872	0.491608	0.989854		4.96549	-0.506486	-1.42059	0.407977	0.991074		9.23486	0.532472	1.44641	0.387846	0.584072		7.57423	0.466889	1.38213	0.379543	0.947972
LOCUS_03210		243822..244526	8.75868	0.425867	1.34338	0.437786	0.9999		9.62309	0.569519	1.48403	0.284544	0.99997		8.18906	0.345149	1.27028	0.541164	0.999997		13.2746	0.819686	1.76502	0.0397384	0.283474		12.9128	0.889284	1.85226	0.0336403	0.611536		8.15481	0.19081	1.1414	0.655749	0.991074		15.6364	0.95669	1.94085	0.0160561	0.0751943		13.8921	0.975134	1.96582	0.0245415	0.428075
LOCUS_03220		244734..245102	0.11113	2.30748	4.95017	0.472024	0.9999		0.328604	3.74031	13.3643	0.223544	ND		0.44386	4.09132	17.0455	0.167454	0.999997		0.439831	3.85997	14.52	0.19788	0.562656		0.551613	4.27367	19.342	0.153252	ND		0.446784	3.94558	15.4077	0.181358	ND		1.12877	5.05561	33.2576	0.0846903	0.229553		0.329147	3.56328	11.821	0.239526	ND
LOCUS_03230		245081..245596	0.705688	-1.13634	-2.19822	0.231487	0.9999		0.946698	0.381298	1.30251	0.654942	ND		0.714403	0.011952	1.00832	0.987956	0.999997		1.25393	0.582907	1.49786	0.419345	0.745416		1.02134	0.381324	1.30254	0.643395	0.990545		0.705688	-0.470289	-1.38539	0.557738	ND		1.5302	0.766152	1.70073	0.261751	0.461703		0.705688	-0.48613	-1.40068	0.505315	0.955457
LOCUS_03240		245607..245777	0.951781	-4.04194	-16.4719	0.18384	0.9999		0.951781	-1.74455	-3.35089	0.278928	ND		0.951781	-1.73234	-3.32266	0.291981	0.999997		0.951781	-1.95351	-3.87315	0.222545	0.590057		0.951781	-0.497316	-1.41158	0.680905	ND		0.951781	-1.0385	-2.05409	0.426119	ND		0.951781	-2.01349	-4.03757	0.213725	0.409912		0.951781	-0.134368	-1.09761	0.905628	0.9941
LOCUS_03250		245756..246229	1.7055	-0.521636	-1.43558	0.47696	0.9999		1.71568	-0.0279206	-1.01954	0.969107	ND		1.7055	-0.155315	-1.11366	0.84529	0.999997		2.90385	0.534114	1.44805	0.332936	0.679571		1.7055	-0.427978	-1.34535	0.482376	0.989854		1.7055	-0.38007	-1.30141	0.549366	0.991074		3.77436	0.809975	1.75318	0.166448	0.352758		1.96455	0.0405032	1.02847	0.947692	0.995228
LOCUS_03260		246241..246963	2.58061	0.297378	1.22891	0.636335	0.9999		2.35901	0.176686	1.13028	0.767962	0.99997		2.88783	0.472769	1.38777	0.421677	0.999997		3.47287	0.517399	1.43137	0.2168	0.58632		3.48021	0.622106	1.53912	0.199232	0.987722		3.26494	0.50225	1.41642	0.2771	0.991074		5.06465	0.960263	1.94567	0.0185068	0.0838952		3.97466	0.801207	1.74256	0.0817903	0.720705
LOCUS_03270		247055..247312	3.61609	-0.286132	-1.21937	0.677334	0.9999		4.08933	0.170812	1.12569	0.791393	0.99997		3.61609	-0.0510632	-1.03603	0.936513	0.999997		4.86344	0.203676	1.15163	0.703275	0.894787		6.45828	0.718224	1.64516	0.161162	0.959116		4.64394	0.213791	1.15973	0.684389	0.991074		4.679	0.0475237	1.03349	0.929745	0.964184		5.64717	0.506845	1.42094	0.371473	0.945774
LOCUS_03280		complement(247441..248658)	2.63027	-0.046825	-1.03299	0.934473	0.9999		2.63027	-0.192735	-1.14293	0.72311	0.99997		2.63027	-0.156853	-1.11485	0.784564	0.999997		4.32184	0.496796	1.41108	0.215249	0.584409		3.13481	0.141976	1.10342	0.734355	0.990545		3.10017	0.0875868	1.06259	0.824915	0.99192		4.16766	0.342795	1.26821	0.377501	0.575781		3.09021	0.10611	1.07632	0.81694	0.986744
LOCUS_03290		complement(248761..249219)	1.67807	0.524847	1.43878	0.474238	0.9999		2.03744	0.80663	1.74912	0.274796	ND		1.1497	-0.671425	-1.59265	0.417632	0.999997		1.85061	0.471701	1.38674	0.484931	0.783223		1.1497	-0.897527	-1.86287	0.321136	0.989854		1.72263	0.421439	1.33926	0.529821	0.991074		2.44778	0.756351	1.68921	0.200968	0.395152		2.20538	0.83409	1.78273	0.230068	0.899962
LOCUS_03300		complement(249203..249604)	2.01801	0.135531	1.0985	0.845694	0.9999		1.81264	-0.264245	-1.20101	0.702678	ND		2.64826	0.536712	1.45066	0.383512	0.999997		2.41899	0.18661	1.13809	0.750906	0.916094		1.81264	-0.277308	-1.21193	0.633614	0.990545		2.2673	0.167828	1.12337	0.772157	0.991074		2.89971	0.345964	1.271	0.527858	0.700915		1.81264	-0.39362	-1.31369	0.530078	0.956492
LOCUS_03310		complement(249867..250430)	0.933057	0.504091	1.41823	0.54173	0.9999		1.1534	0.807684	1.7504	0.310012	ND		1.16284	0.848877	1.8011	0.303121	0.999997		1.22167	0.675844	1.59753	0.303705	0.662178		1.1531	0.703341	1.62827	0.308566	0.989854		1.24742	0.780915	1.71822	0.251266	0.991074		1.9185	1.22045	2.3302	0.0414673	0.146327		1.14822	0.678624	1.60061	0.348216	0.937303
LOCUS_03320		250673..251071	48.6698	0.228885	1.17193	0.644504	0.9999		42.7355	0.0563073	1.0398	0.904901	0.99997		41.1371	-0.00619395	-1.0043	0.990134	0.999997		44.6543	-0.0967212	-1.06934	0.78246	0.929415		47.4648	0.105122	1.07559	0.774355	0.990545		52.7105	0.226907	1.17032	0.568897	0.991074		41.1371	-0.375901	-1.29765	0.314928	0.515859		51.0305	0.193229	1.14332	0.610493	0.962359
LOCUS_03330		251052..251432	32.7405	0.144697	1.1055	0.763335	0.9999		31.6477	0.106033	1.07626	0.834519	0.99997		32.0138	0.127096	1.09209	0.783521	0.999997		29.2287	-0.282722	-1.21649	0.487757	0.784973		31.4671	-0.00890884	-1.00619	0.981631	0.997045		31.3722	-0.0513509	-1.03623	0.896403	0.991929		29.2287	-0.351531	-1.27591	0.355427	0.553716		33.0434	0.0399241	1.02806	0.919235	0.994151
LOCUS_03340		251819..252334	39.1226	-0.0777194	-1.05535	0.892758	0.9999		39.1226	-0.150684	-1.1101	0.769222	0.99997		39.1226	-0.100126	-1.07187	0.839707	0.999997		39.1226	-0.409291	-1.32803	0.301645	0.659956		39.1226	-0.275541	-1.21045	0.465012	0.989854		39.1226	-0.379117	-1.30055	0.340312	0.991074		39.1226	-0.510823	-1.42486	0.174158	0.361808		39.1226	-0.261526	-1.19875	0.496438	0.955457
LOCUS_03350		complement(252369..253670)	107.974	0.0129486	1.00902	0.975741	0.9999		111.01	0.057454	1.04063	0.898742	0.99997		114.983	0.110753	1.07979	0.80877	0.999997		126.644	0.0330048	1.02314	0.924329	0.975218		118.667	0.0488881	1.03447	0.884548	0.990545		119.06	0.0174878	1.0122	0.960146	0.996072		125.016	-0.0835661	-1.05963	0.812949	0.899606		120.832	0.0565995	1.04001	0.861809	0.993691
LOCUS_03360		complement(253790..255190)	170.364	0.0602401	1.04264	0.882666	0.9999		176.391	0.119251	1.08617	0.763741	0.99997		176.675	0.117886	1.08514	0.787752	0.999997		204.878	0.12644	1.0916	0.702567	0.89454		201.622	0.211955	1.15826	0.50226	0.989854		204.075	0.195471	1.1451	0.618015	0.991074		191.373	-0.0708101	-1.05031	0.835939	0.915631		207.114	0.233023	1.1753	0.461074	0.955457
ssb		255442..255978	688.958	0.0137095	1.00955	0.976986	0.9999		686.218	-0.000192922	-1.00013	0.999665	0.99997		694.1	0.0444995	1.03133	0.930227	0.999997		677.464	-0.457025	-1.37271	0.191966	0.553024		677.464	-0.219056	-1.16397	0.516717	0.989854		677.464	-0.252857	-1.19156	0.462284	0.991074		677.464	-0.679518	-1.6016	0.0535893	0.172529		677.464	-0.234429	-1.17644	0.507632	0.955457
LOCUS_03380		256115..256366	49.8259	-0.205481	-1.15307	0.67249	0.9999		55.605	0.148444	1.10837	0.76213	0.99997		49.8259	-0.0771869	-1.05496	0.867775	0.999997		53.1942	-0.129084	-1.0936	0.749074	0.915375		58.3491	0.113328	1.08172	0.769118	0.990545		56.0867	0.0195939	1.01367	0.959571	0.996072		55.144	-0.176494	-1.13013	0.646418	0.787462		52.2041	-0.066037	-1.04684	0.857899	0.993691
LOCUS_03390		256363..256674	50.632	-0.218424	-1.16346	0.681568	0.9999		50.632	-0.195033	-1.14475	0.694935	0.99997		50.632	-0.121174	-1.08762	0.811443	0.999997		55.8398	-0.0818353	-1.05836	0.816979	0.942075		50.632	-0.136087	-1.09892	0.70286	0.990545		56.6225	0.0100467	1.00699	0.978766	0.997314		56.1393	-0.173493	-1.12779	0.636311	0.780953		51.2422	-0.115827	-1.0836	0.774874	0.980081
LOCUS_03400		256671..257099	72.9654	-0.260643	-1.19801	0.56548	0.9999		72.9654	-0.206565	-1.15394	0.664912	0.99997		72.9654	-0.372072	-1.29421	0.393411	0.999997		72.9654	-0.382407	-1.30352	0.265975	0.629637		72.9654	-0.235014	-1.17692	0.500903	0.989854		72.9654	-0.181489	-1.13405	0.607422	0.991074		72.9654	-0.55839	-1.47262	0.11064	0.272958		72.9654	-0.183769	-1.13585	0.65055	0.965182
LOCUS_03410		257608..257847	22.464	-0.38046	-1.30176	0.517272	0.9999		22.464	-0.225523	-1.1692	0.687176	0.99997		22.464	-0.483044	-1.39769	0.387286	0.999997		22.464	-0.534854	-1.4488	0.15236	0.505695		22.464	-0.420859	-1.33872	0.315272	0.989854		22.464	-0.406388	-1.32536	0.355054	0.991074		22.464	-0.650406	-1.56961	0.0653033	0.196243		22.464	-0.329775	-1.25682	0.419289	0.948213
LOCUS_03420		258226..258900	34.3702	-0.346668	-1.27162	0.512903	0.9999		34.3702	-0.230288	-1.17307	0.589999	0.99997		34.3702	-0.223693	-1.16772	0.653906	0.999997		34.3702	-0.483448	-1.39808	0.19695	0.561738		34.3702	-0.312432	-1.2418	0.407894	0.989854		35.0847	-0.133055	-1.09661	0.737589	0.991074		34.3702	-0.622263	-1.53929	0.0390439	0.140849		34.3702	-0.190568	-1.14121	0.64079	0.965182
LOCUS_03430		258917..259726	25.4371	-0.33749	-1.26356	0.520337	0.9999		25.4371	-0.231524	-1.17407	0.640666	0.99997		25.4371	-0.266732	-1.20308	0.576407	0.999997		25.4371	-0.235268	-1.17713	0.538544	0.81217		26.0817	-0.0919693	-1.06582	0.80772	0.990545		25.4371	-0.278236	-1.21271	0.392527	0.991074		25.4371	-0.574738	-1.48941	0.106238	0.265787		27.1838	-0.0483542	-1.03408	0.897311	0.993691
LOCUS_03440		259726..259953	33.9228	-0.38166	-1.30284	0.540572	0.9999		33.9228	-0.435821	-1.35268	0.447255	0.99997		33.9228	-0.404662	-1.32378	0.510483	0.999997		33.9228	-0.383314	-1.30433	0.337407	0.683032		33.9228	-0.392386	-1.31256	0.368764	0.989854		33.9228	-0.305579	-1.23591	0.460536	0.991074		33.9228	-0.918473	-1.89011	0.0123232	0.0629589		33.9228	-0.236456	-1.1781	0.594438	0.960549
LOCUS_03450		260241..260702	22.197	-0.194681	-1.14447	0.735077	0.9999		22.197	-0.153975	-1.11263	0.754402	0.99997		22.197	-0.196164	-1.14565	0.696829	0.999997		22.197	-0.235758	-1.17752	0.54942	0.817234		22.4301	-0.088835	-1.06351	0.832646	0.990545		22.2717	-0.139719	-1.10169	0.749568	0.991074		22.2369	-0.305389	-1.23575	0.413131	0.605884		26.11	0.117772	1.08506	0.778602	0.980963
LOCUS_03460		260684..260947	23.6319	-0.279164	-1.21349	0.616704	0.9999		23.6319	-0.488131	-1.40263	0.388297	0.99997		23.6319	-0.242804	-1.18329	0.659927	0.999997		23.786	-0.213413	-1.15943	0.591855	0.841421		24.6185	-0.0542574	-1.03832	0.888687	0.990545		24.9589	-0.0711617	-1.05056	0.846514	0.99192		23.6319	-0.572509	-1.48711	0.133812	0.307309		25.1469	-0.0408125	-1.02869	0.919527	0.994151
LOCUS_03470		260940..261359	22.3754	-0.052289	-1.03691	0.929809	0.9999		22.3754	-0.23304	-1.17531	0.676737	0.99997		22.3754	-0.343312	-1.26867	0.541303	0.999997		22.3754	-0.273542	-1.20877	0.482902	0.782573		23.134	-0.0611947	-1.04333	0.884605	0.990545		22.3754	-0.174561	-1.12862	0.707584	0.991074		22.3754	-0.519326	-1.43329	0.169138	0.356045		26.5032	0.111088	1.08004	0.79734	0.98265
LOCUS_03480		261435..261917	22.6327	0.290867	1.22338	0.58504	0.9999		19.5814	0.0928224	1.06645	0.867017	0.99997		18.2861	-0.133433	-1.0969	0.810911	0.999997		24.9021	0.222943	1.16711	0.572204	0.831268		20.9393	0.0824486	1.05881	0.841863	0.990545		24.5796	0.275236	1.21019	0.536041	0.991074		22.6695	-0.00771872	-1.00536	0.983813	0.992252		26.3972	0.396976	1.31674	0.344608	0.937303
LOCUS_03490		262428..262595	7.50564	0.29358	1.22568	0.645929	0.9999		7.01008	0.20675	1.15409	0.748382	0.99997		6.02048	-0.107283	-1.0772	0.85803	0.999997		6.02048	-0.773442	-1.70934	0.203659	0.569529		7.01903	0.102219	1.07342	0.846889	0.990545		8.90669	0.403703	1.3229	0.475598	0.991074		6.02048	-0.342937	-1.26834	0.528484	0.700915		8.43206	0.346514	1.27149	0.535429	0.958158
LOCUS_03500		263165..263515	11.8859	-0.0552095	-1.03901	0.922333	0.9999		11.8859	-0.167735	-1.12329	0.751498	0.99997		11.8859	-0.606604	-1.52267	0.209973	0.999997		12.9214	-0.102845	-1.07389	0.772386	0.925216		12.8515	-0.00170936	-1.00119	0.996563	0.998317		12.5021	-0.0764694	-1.05443	0.849311	0.99192		11.8859	-0.839537	-1.78948	0.015718	0.07411		14.3007	0.133085	1.09664	0.741261	0.968441
LOCUS_03510		263512..263835	12.572	0.0588647	1.04165	0.917785	0.9999		13.4028	0.122583	1.08868	0.822771	0.99997		12.3777	0.0119142	1.00829	0.982333	0.999997		14.1261	-0.0180639	-1.0126	0.961111	0.985928		12.2536	-0.169271	-1.12449	0.647165	0.990545		16.1172	0.244474	1.18466	0.560735	0.991074		12.4632	-0.298416	-1.22979	0.43613	0.625157		17.6151	0.389703	1.31012	0.347749	0.937303
LOCUS_03520		264232..264813	11.6725	0.0341856	1.02398	0.956593	0.9999		12.1406	0.0815759	1.05817	0.885734	0.99997		11.4202	-0.313805	-1.24298	0.595079	0.999997		11.4202	-0.248736	-1.18817	0.520433	0.801473		11.4202	-0.315443	-1.24439	0.414777	0.989854		11.4821	-0.142291	-1.10366	0.716623	0.991074		11.4202	-0.616098	-1.53272	0.0967101	0.250646		13.5613	0.116432	1.08405	0.787268	0.981364
LOCUS_03530		265092..265280	3.67398	0.119857	1.08663	0.878314	0.9999		3.86592	0.162247	1.11903	0.814659	ND		3.42489	-0.395734	-1.31561	0.594493	0.999997		3.42489	-0.518258	-1.43222	0.426838	0.746994		3.42489	-0.640576	-1.55895	0.321745	0.989854		4.40021	0.199339	1.14817	0.738763	0.991074		3.42489	-0.376444	-1.29814	0.547487	0.713947		5.13933	0.44284	1.35928	0.436306	0.954635
LOCUS_03540		265258..265416	3.56967	-1.203	-2.30218	0.142176	0.9999		3.56967	-0.345954	-1.27099	0.643727	ND		3.60091	0.0118855	1.00827	0.98746	0.999997		4.58738	0.133768	1.09716	0.817449	0.942075		3.58081	-0.109434	-1.0788	0.863641	0.990545		3.56967	-0.459073	-1.37466	0.495953	0.991074		3.56967	-0.75974	-1.69319	0.217626	0.414896		3.56967	-0.352437	-1.27672	0.601963	0.962359
LOCUS_03550		complement(266932..267534)	38.3093	-0.119348	-1.08624	0.800391	0.9999		39.4904	0.0324995	1.02278	0.942206	0.99997		40.7861	0.0896412	1.06411	0.846048	0.999997		41.7765	-0.0901632	-1.06449	0.803326	0.936768		48.2543	0.232883	1.17518	0.523884	0.989854		50.3229	0.247405	1.18707	0.497416	0.991074		40.9267	-0.215766	-1.16132	0.491249	0.673837		52.96	0.341476	1.26705	0.331404	0.936251
LOCUS_03560		complement(267936..268217)	44.6098	1.05683	2.08036	0.114903	0.9999		27.8237	0.439491	1.35613	0.466121	0.99997		31.7492	0.599875	1.51559	0.367602	0.999997		74.8079	1.6697	3.18148	3.63403e-05	0.00168267		34.1091	0.65106	1.57032	0.170271	0.967354		58.0217	1.37366	2.59128	0.000994041	0.119951		92.5024	1.87109	3.65809	3.67452e-06	8.77635e-05		46.7832	1.08887	2.12708	0.0172533	0.353716
LOCUS_03570		268655..269077	5.84227	-0.549644	-1.46372	0.328488	0.9999		6.621	0.172759	1.12721	0.753297	0.99997		5.84227	-0.139712	-1.10169	0.808086	0.999997		6.22606	-0.131751	-1.09562	0.740043	0.910895		7.20489	0.187745	1.13898	0.675883	0.990545		7.82711	0.272208	1.20765	0.502842	0.991074		6.5912	-0.148977	-1.10878	0.722279	0.841649		7.65408	0.255558	1.1938	0.55243	0.960549
LOCUS_03580		269074..269514	7.99894	-0.431743	-1.34886	0.441387	0.9999		7.99894	-0.312741	-1.24207	0.542924	0.99997		7.99894	-0.199299	-1.14814	0.706489	0.999997		9.17788	-0.0107011	-1.00745	0.979498	0.993411		7.99894	-0.360475	-1.28385	0.378926	0.989854		8.21226	-0.0834525	-1.05955	0.844092	0.99192		10.0055	0.0127504	1.00888	0.973937	0.987111		8.71871	-0.00649881	-1.00451	0.987541	0.997777
LOCUS_03590		269586..270212	7.43605	-0.0144473	-1.01006	0.979814	0.9999		7.64767	0.0440865	1.03103	0.937035	0.99997		7.56864	0.0334542	1.02346	0.951954	0.999997		11.1124	0.369532	1.29193	0.329493	0.677246		9.00673	0.176403	1.13006	0.660441	0.990545		9.3936	0.199344	1.14818	0.619282	0.991074		11.3475	0.300413	1.2315	0.440442	0.628519		10.0068	0.30861	1.23851	0.451636	0.955457
LOCUS_03600		complement(270229..270441)	17.2866	-0.314362	-1.24346	0.572166	0.9999		17.5262	0.00755691	1.00525	0.98789	0.99997		17.5038	0.0311892	1.02185	0.955707	0.999997		22.2762	0.123345	1.08926	0.781617	0.928642		27.1053	0.514201	1.4282	0.233169	0.989854		17.7474	-0.128592	-1.09323	0.749913	0.991074		20.3148	-0.0931992	-1.06673	0.807193	0.896572		27.7491	0.52696	1.44089	0.241184	0.900717
LOCUS_03610		270683..271099	14.8587	-0.236734	-1.17832	0.672415	0.9999		14.8587	-0.0432801	-1.03045	0.936732	0.99997		14.8587	-0.277507	-1.2121	0.615277	0.999997		14.8587	-0.779304	-1.7163	0.035589	0.268676		14.8587	-0.49611	-1.41041	0.204285	0.987722		14.8587	-0.479991	-1.39473	0.232209	0.991074		14.8587	-0.351792	-1.27614	0.310061	0.510896		14.8587	-0.304308	-1.23483	0.427833	0.950827
LOCUS_03620		271640..272131	194.538	-0.209726	-1.15647	0.627693	0.9999		194.538	-0.149163	-1.10893	0.721315	0.99997		194.538	-0.287783	-1.22076	0.477094	0.999997		194.538	-0.792083	-1.73157	0.0579173	0.337318		194.538	-0.426854	-1.3443	0.139198	0.948263		194.538	-0.42156	-1.33938	0.228348	0.991074		194.538	-1.29099	-2.44696	1.10754e-05	0.00022044		194.538	-0.590545	-1.50582	0.0598196	0.6478
LOCUS_03630		272128..272643	232.359	-0.174654	-1.12869	0.723218	0.9999		232.359	-0.14911	-1.10888	0.731948	0.99997		232.359	-0.376829	-1.29848	0.422366	0.999997		232.359	-0.925356	-1.89915	0.00920437	0.128794		232.359	-0.5033	-1.41745	0.0899573	0.885251		232.359	-0.411781	-1.33033	0.143285	0.991074		232.359	-1.3808	-2.60412	0.00025364	0.00317279		232.359	-0.665926	-1.58659	0.0212027	0.400657
LOCUS_03640		272571..272987	174.605	-0.246815	-1.18658	0.617625	0.9999		174.605	-0.134053	-1.09737	0.756117	0.99997		174.605	-0.307526	-1.23758	0.518467	0.999997		174.605	-0.976224	-1.96731	0.00398798	0.0749676		174.605	-0.58042	-1.49528	0.137844	0.947821		174.605	-0.421473	-1.33929	0.180612	0.991074		174.605	-1.36075	-2.56819	0.000337217	0.0040021		174.605	-0.731619	-1.6605	0.0578173	0.643634
LOCUS_03650		273172..273594	68.0492	-0.222274	-1.16657	0.629856	0.9999		68.0492	-0.09953	-1.07142	0.826049	0.99997		68.0492	-0.0737838	-1.05247	0.868275	0.999997		68.0492	-0.49641	-1.4107	0.191459	0.552323		68.0492	-0.258751	-1.19644	0.49986	0.989854		68.0492	-0.28731	-1.22036	0.449895	0.991074		68.0492	-0.642696	-1.56124	0.117007	0.282376		73.8742	-0.0254644	-1.01781	0.94378	0.995228
LOCUS_03660		273567..274784	72.1932	-0.101345	-1.07277	0.802497	0.9999		72.1932	-0.117039	-1.08451	0.78892	0.99997		72.1932	-0.0719545	-1.05114	0.85858	0.999997		72.1932	-0.310988	-1.24056	0.430103	0.749431		72.1932	-0.311987	-1.24142	0.299406	0.989854		73.0588	-0.152577	-1.11155	0.654455	0.991074		72.1932	-0.485135	-1.39972	0.15917	0.343655		72.1932	-0.189497	-1.14037	0.50086	0.955457
LOCUS_03670		complement(274820..275344)	22.4596	-0.116644	-1.08421	0.805898	0.9999		22.4596	-0.316966	-1.24571	0.538168	0.99997		22.4596	-0.312289	-1.24168	0.508228	0.999997		22.8371	-0.197214	-1.14648	0.647701	0.869254		23.6747	-0.0359665	-1.02524	0.92313	0.991829		25.7916	0.0515054	1.03635	0.892534	0.991929		24.3311	-0.205254	-1.15289	0.581543	0.739051		23.8997	-0.0416486	-1.02929	0.907482	0.994151
LOCUS_03680		complement(275347..275703)	22.6884	-0.280617	-1.21471	0.660007	0.9999		22.6884	-0.018584	-1.01296	0.974354	0.99997		23.3952	0.0418442	1.02943	0.93863	0.999997		25.8805	-0.0342634	-1.02403	0.935405	0.979106		26.8688	0.128967	1.09351	0.758695	0.990545		22.6884	-0.270151	-1.20593	0.498441	0.991074		22.7245	-0.320786	-1.24901	0.422058	0.613189		25.6232	0.0414222	1.02913	0.923725	0.994151
LOCUS_03690		275807..276169	35.0382	-0.24932	-1.18865	0.60849	0.9999		35.0382	-0.134801	-1.09794	0.790881	0.99997		35.0382	-0.196593	-1.14599	0.678733	0.999997		35.0382	-0.270186	-1.20596	0.512776	0.797396		36.3802	-0.0596089	-1.04218	0.865221	0.990545		35.0382	-0.225497	-1.16918	0.539433	0.991074		35.0382	-0.566871	-1.48131	0.110212	0.272429		35.0382	-0.199783	-1.14853	0.593601	0.960549
LOCUS_03700		276209..276898	23.9179	-0.251894	-1.19077	0.637874	0.9999		23.9179	-0.173018	-1.12741	0.729858	0.99997		23.9179	-0.0561889	-1.03972	0.913429	0.999997		23.9179	-0.19708	-1.14638	0.586875	0.839492		27.6765	0.12704	1.09205	0.732897	0.990545		25.1724	-0.0399062	-1.02805	0.921963	0.994892		23.9179	-0.433603	-1.3506	0.265384	0.465519		25.5157	-0.0116397	-1.0081	0.976871	0.997777
LOCUS_03710		complement(276912..277949)	16.3775	-0.127784	-1.09261	0.817717	0.9999		16.3775	-0.0427382	-1.03007	0.933424	0.99997		16.3775	-0.0558208	-1.03945	0.919096	0.999997		25.4382	0.46148	1.37695	0.260552	0.626966		21.8007	0.353075	1.27728	0.373426	0.989854		21.675	0.305341	1.23571	0.402646	0.991074		27.6189	0.48175	1.39644	0.173078	0.360776		19.6508	0.17945	1.13245	0.662019	0.965182
LOCUS_03720		complement(277907..278599)	5.49945	-0.119425	-1.0863	0.832617	0.9999		6.56787	0.249543	1.18883	0.660134	0.99997		6.67141	0.276763	1.21147	0.619979	0.999997		11.5112	0.843281	1.79413	0.0425257	0.293055		7.85334	0.402053	1.32139	0.324124	0.989854		8.74744	0.522559	1.4365	0.233913	0.991074		13.6275	0.987112	1.98221	0.00850129	0.0480587		7.47551	0.311331	1.24085	0.438506	0.955304
LOCUS_03730		complement(278580..278897)	7.26081	-0.260678	-1.19804	0.643377	0.9999		7.26081	-0.376571	-1.29825	0.47085	0.99997		7.26081	-0.393041	-1.31316	0.485482	0.999997		8.9183	0.0720708	1.05122	0.854743	0.954496		7.26081	-0.26916	-1.20511	0.514541	0.989854		9.23271	0.197805	1.14695	0.629551	0.991074		8.37331	-0.117515	-1.08486	0.754936	0.863647		9.29283	0.22136	1.16583	0.596656	0.960549
LOCUS_03740		complement(279151..280647)	4.09332	0.094049	1.06736	0.862304	0.9999		3.78923	-0.100358	-1.07204	0.860018	0.99997		3.82773	0.0127171	1.00885	0.981508	0.999997		6.11563	0.467416	1.38263	0.269079	0.629637		5.48374	0.419654	1.33761	0.324002	0.989854		4.45838	0.0844994	1.06032	0.827006	0.99192		8.28115	0.80524	1.74744	0.0375718	0.137398		5.19091	0.321222	1.24939	0.423679	0.950116
LOCUS_03750		complement(280659..280898)	2.19537	-2.04147	-4.11666	0.0372734	0.9999		2.19537	-0.375661	-1.29743	0.649071	ND		2.19537	-1.32353	-2.50278	0.125611	0.999997		2.19537	-1.86389	-3.63987	0.0239559	0.215506		2.19537	-1.4455	-2.72358	0.0848303	0.879317		2.19537	-0.988473	-1.98408	0.21316	0.991074		2.77298	0.0101092	1.00703	0.985919	0.992804		2.19537	-0.652834	-1.57225	0.384409	0.948039
LOCUS_03760		complement(280895..281059)	0.492905	-0.0142642	-1.00994	0.992128	0.9999		1.72104	1.68228	3.20935	0.161395	ND		0.742349	0.499582	1.4138	0.728183	0.999997		2.45332	1.96361	3.90036	0.0760417	0.386532		1.23043	1.11135	2.16048	0.370911	ND		1.00551	0.796095	1.73639	0.519546	ND		1.2602	0.935549	1.91262	0.450447	0.637904		2.20753	1.90465	3.74418	0.0956102	0.748572
LOCUS_03770		281441..282466	27.4228	1.39675	2.63309	0.0117819	0.693733		22.3219	1.11169	2.16098	0.0176639	0.99997		27.8275	1.47657	2.78287	0.00240445	0.120477		25.7895	1.1078	2.15516	0.00467936	0.0831402		15.0385	0.432232	1.34932	0.239411	0.989854		32.4028	1.50044	2.82929	6.98968e-05	0.016056		33.6235	1.38822	2.61755	9.48543e-07	2.59846e-05		35.5533	1.66347	3.16778	0.000238057	0.0108621
LOCUS_03780		282430..282885	26.1176	1.28636	2.43911	0.0345179	0.9999		20.6567	0.957489	1.94193	0.102963	0.99997		22.6414	1.14518	2.21174	0.053975	0.999997		30.4663	1.30227	2.46617	0.000929445	0.0239897		14.8728	0.378396	1.2999	0.334391	0.989854		26.4545	1.16654	2.24473	0.00945031	0.491126		39.8801	1.59091	3.01239	7.5039e-06	0.000161102		31.7845	1.46122	2.75342	0.00183223	0.0652884
nrfB		282930..283496	17.9286	1.35339	2.55512	0.0396837	0.9999		15.5356	1.1544	2.22592	0.042236	0.99997		14.9521	1.11488	2.16577	0.0629078	0.999997		22.2833	1.45807	2.74741	0.000821441	0.022176		8.88055	0.229997	1.17283	0.569612	0.990494		18.6772	1.25749	2.39079	0.00306173	0.236984		28.5497	1.71575	3.28467	1.42011e-05	0.000274782		16.9915	1.14684	2.21429	0.00646565	0.188259
LOCUS_03800		283493..284164	16.4677	1.69169	3.23035	0.00975704	0.605651		10.3871	1.02723	2.03811	0.0819654	0.99997		10.2994	1.02681	2.03751	0.0766224	0.999997		12.2931	1.05297	2.07479	0.00850994	0.124076		6.59014	0.264112	1.2009	0.491771	0.989854		10.1038	0.841071	1.79138	0.0581225	0.991074		21.2409	1.7415	3.34382	1.59197e-05	0.000302122		14.8198	1.39727	2.63403	0.00175697	0.0638225
LOCUS_03810		284161..284976	20.3985	1.46383	2.7584	0.00306729	0.236553		14.1691	0.938392	1.91639	0.109867	0.99997		10.9862	0.56941	1.48392	0.350596	0.999997		19.162	1.15088	2.2205	0.00608567	0.0997737		7.56421	-0.100223	-1.07194	0.808391	0.990545		13.6987	0.700492	1.62506	0.150926	0.991074		27.2798	1.56597	2.96076	0.000144293	0.00196233		17.1666	1.0648	2.09188	0.027649	0.454336
LOCUS_03820		284898..285116	14.1245	1.43102	2.69638	0.015762	0.891696		8.71076	0.737184	1.66692	0.225573	0.99997		7.48408	0.541992	1.45598	0.413296	0.999997		17.3939	1.51491	2.85782	0.000766529	0.0212184		8.71675	0.632158	1.54988	0.210457	0.987722		11.8721	1.02497	2.03492	0.0507076	0.991074		21.4716	1.71892	3.29189	0.000162654	0.00216579		15.7129	1.45562	2.74274	0.00345706	0.111027
LOCUS_03830		285172..286848	6.71295	1.12323	2.17834	0.0605432	0.9999		4.5992	0.588329	1.5035	0.293103	0.99997		3.49118	0.196419	1.14585	0.715618	0.999997		7.24808	1.02803	2.03924	0.0150345	0.167689		3.24561	-0.0200843	-1.01402	0.958604	0.995544		5.29734	0.651849	1.57118	0.119817	0.991074		11.3623	1.57684	2.98316	7.76538e-06	0.000164407		6.83267	1.05111	2.07213	0.0464419	0.584618
LOCUS_03840		286845..287228	6.45886	0.713572	1.63986	0.228857	0.9999		4.6548	0.251058	1.19008	0.694314	0.99997		3.90977	-0.0587209	-1.04154	0.92994	0.999997		8.65131	0.920552	1.89284	0.0486929	0.3113		4.12549	-0.0314682	-1.02205	0.953683	0.994757		8.00121	0.8813	1.84204	0.0616797	0.991074		9.42433	0.944876	1.92502	0.0301288	0.117848		6.85304	0.713167	1.6394	0.183957	0.859667
LOCUS_03850		287252..287821	9.03815	0.633916	1.55177	0.278907	0.9999		5.9178	0.0381002	1.02676	0.940322	0.99997		6.17291	0.102805	1.07386	0.841308	0.999997		8.17078	0.285017	1.21842	0.458648	0.769956		8.47625	0.460959	1.37646	0.259627	0.989854		10.0254	0.656742	1.57652	0.147504	0.991074		9.63902	0.435351	1.35224	0.276825	0.476418		8.94781	0.51627	1.43025	0.197636	0.869437
gltP		288162..289478	235.156	-0.00653399	-1.00454	0.990256	0.9999		228.583	-0.139647	-1.10164	0.778811	0.99997		228.583	-0.0924922	-1.06621	0.859016	0.999997		280.939	0.113252	1.08166	0.760617	0.919564		244.929	0.0263895	1.01846	0.93604	0.993526		322.132	0.386108	1.30686	0.315649	0.991074		354.62	0.351845	1.27619	0.416636	0.608863		279.588	0.199151	1.14802	0.573747	0.960549
yjcO		complement(289962..290633)	64.4679	0.234387	1.17641	0.596175	0.9999		55.6991	0.0385835	1.0271	0.918446	0.99997		55.4291	0.0348215	1.02443	0.933151	0.999997		74.9747	0.249653	1.18892	0.472277	0.776625		57.8488	-0.0155932	-1.01087	0.958864	0.995544		63.4458	0.0809797	1.05774	0.792196	0.99192		83.471	0.305208	1.2356	0.389148	0.584327		55.8321	-0.085478	-1.06104	0.798578	0.983017
LOCUS_03880		complement(290751..291461)	32.2994	0.063495	1.04499	0.893729	0.9999		30.3155	-0.0696308	-1.04945	0.871225	0.99997		30.3155	-0.105871	-1.07614	0.826924	0.999997		32.2513	-0.131652	-1.09555	0.72242	0.902561		37.0331	0.177073	1.13059	0.616425	0.990545		34.6963	0.0457013	1.03218	0.907554	0.991929		30.3155	-0.383141	-1.30418	0.202377	0.395942		32.5631	-0.0278763	-1.01951	0.941033	0.995228
LOCUS_03890		complement(291448..292284)	42.7262	-0.079547	-1.05669	0.859649	0.9999		42.7262	-0.174923	-1.1289	0.692557	0.99997		42.7262	-0.286502	-1.21968	0.512544	0.999997		42.7856	-0.222111	-1.16644	0.529596	0.807769		46.6985	0.0127791	1.0089	0.965438	0.995885		42.7262	-0.20481	-1.15253	0.474264	0.991074		42.7262	-0.583179	-1.49815	0.067495	0.200336		48.1163	0.0370766	1.02603	0.898589	0.993691
LOCUS_03900		complement(292277..293032)	51.3611	-0.248336	-1.18784	0.576008	0.9999		51.3611	-0.155197	-1.11357	0.68464	0.99997		51.3611	-0.336676	-1.26284	0.435976	0.999997		51.3611	-0.609156	-1.52537	0.105705	0.438431		51.3611	-0.323143	-1.25105	0.30871	0.989854		51.3611	-0.335037	-1.26141	0.224016	0.991074		51.3611	-0.723983	-1.65174	0.020161	0.0889153		51.3611	-0.317076	-1.2458	0.351635	0.937916
LOCUS_03910		complement(293109..293663)	45.6798	-0.178747	-1.1319	0.685158	0.9999		45.6798	-0.0902443	-1.06455	0.837896	0.99997		45.6798	-0.356073	-1.27994	0.45703	0.999997		45.6798	-0.530309	-1.44424	0.125885	0.468733		45.6798	-0.18627	-1.13782	0.617102	0.990545		45.6798	-0.334373	-1.26083	0.400575	0.991074		45.6798	-1.00095	-2.00132	0.00098888	0.00937718		45.6798	-0.208488	-1.15548	0.602728	0.962359
LOCUS_03920		complement(293663..294097)	57.1273	-0.11794	-1.08518	0.788093	0.9999		57.1273	-0.22139	-1.16586	0.611185	0.99997		57.1273	-0.424553	-1.34216	0.387608	0.999997		57.1273	-0.66278	-1.58313	0.0836809	0.401081		57.1273	-0.423687	-1.34135	0.26792	0.989854		57.1273	-0.375737	-1.2975	0.350904	0.991074		57.1273	-1.09652	-2.13839	0.00164746	0.0138979		57.1273	-0.278011	-1.21252	0.508793	0.955457
LOCUS_03930		complement(294256..294642)	112.194	-0.197621	-1.14681	0.657942	0.9999		112.194	-0.308745	-1.23863	0.471256	0.99997		112.194	-0.283321	-1.21699	0.540274	0.999997		112.194	-0.913497	-1.88361	0.0201053	0.197671		112.194	-0.645627	-1.56442	0.0560133	0.764159		112.194	-0.532532	-1.44647	0.100447	0.991074		112.194	-1.43872	-2.71081	7.30086e-05	0.00110496		112.194	-0.587355	-1.50249	0.0735334	0.689273
LOCUS_03940		complement(294651..295823)	167.982	-0.161144	-1.11817	0.699042	0.9999		167.982	-0.133026	-1.09659	0.751079	0.99997		167.982	-0.406234	-1.32522	0.359475	0.999997		167.982	-0.939797	-1.91826	0.0131967	0.157521		167.982	-0.581603	-1.49651	0.108145	0.927511		167.982	-0.596158	-1.51169	0.0762118	0.991074		167.982	-1.4869	-2.80286	5.13572e-05	0.000833383		167.982	-0.570424	-1.48496	0.104741	0.767654
LOCUS_03950		complement(296197..296985)	803.657	-0.220687	-1.16529	0.652967	0.9999		803.657	-0.198778	-1.14773	0.675881	0.99997		803.657	-0.559316	-1.47357	0.316812	0.999997		803.657	-1.41189	-2.66085	0.00139063	0.0333053		803.657	-0.869119	-1.82655	0.0274181	0.545828		803.657	-0.836822	-1.78611	0.0515829	0.991074		803.657	-2.58652	-6.0065	2.65592e-09	1.23026e-07		803.657	-1.15258	-2.2231	0.00235879	0.0808597
LOCUS_03960		complement(296919..297461)	1216.15	-0.270863	-1.20653	0.558526	0.9999		1216.15	-0.232781	-1.1751	0.62364	0.99997		1216.15	-0.612786	-1.52921	0.272389	0.999997		1216.15	-1.51373	-2.85547	0.000706425	0.0202138		1216.15	-0.906472	-1.87446	0.0227451	0.489789		1216.15	-0.893399	-1.85755	0.0376097	0.914058		1216.15	-2.69218	-6.46291	6.23309e-10	3.21888e-08		1216.15	-1.20064	-2.29842	0.00174965	0.0638225
LOCUS_03970		complement(297446..298372)	685.604	-0.340003	-1.26576	0.487425	0.9999		685.604	-0.271757	-1.20728	0.566626	0.99997		685.604	-0.696178	-1.62021	0.200347	0.999997		685.604	-1.67482	-3.1928	0.000221627	0.00776711		685.604	-0.98188	-1.97504	0.0137865	0.360714		685.604	-1.00259	-2.00359	0.0211862	0.711525		685.604	-3.07964	-8.45401	7.03013e-13	4.79744e-11		685.604	-1.43885	-2.71104	0.000230548	0.010584
LOCUS_03980		complement(298523..298924)	2.41752	0.238789	1.18	0.740939	0.9999		2.22492	0.130953	1.09502	0.85326	ND		2.01815	-0.713015	-1.63923	0.370502	0.999997		3.02156	0.356053	1.27992	0.512072	0.797396		2.02076	-0.10918	-1.07861	0.857427	0.990545		3.40096	0.598107	1.51373	0.228402	0.991074		2.17168	-0.214298	-1.16014	0.714094	0.837346		2.71853	0.2944	1.22637	0.591764	0.960549
LOCUS_03990		complement(298927..299709)	2.33052	-0.051587	-1.0364	0.933314	0.9999		2.33052	-0.36397	-1.28696	0.574893	0.99997		2.33052	-0.268398	-1.20447	0.666978	0.999997		3.77771	0.472514	1.38752	0.286653	0.645905		3.42578	0.441484	1.358	0.31189	0.989854		2.33052	-0.321825	-1.24991	0.546625	0.991074		4.09105	0.488377	1.40287	0.224302	0.422252		2.48051	-0.0252382	-1.01765	0.961639	0.997208
LOCUS_04000		complement(299839..300003)	0.98166	0.372859	1.29492	0.737803	0.9999		0.737293	-0.536521	-1.45047	0.678098	ND		1.24292	0.703576	1.62854	0.543535	0.999997		1.71929	0.933891	1.91042	0.348188	0.692929		0.986567	0.276501	1.21125	0.80756	ND		1.52095	0.82356	1.76977	0.469988	ND		1.76454	0.871763	1.8299	0.38186	0.579769		0.737293	-0.134708	-1.09787	0.916055	ND
LOCUS_04010		complement(300149..301318)	1.94049	0.384852	1.30573	0.544715	0.9999		1.73738	0.238335	1.17963	0.708955	0.99997		1.57335	0.100393	1.07207	0.878441	0.999997		2.35378	0.478398	1.3932	0.339659	0.68502		2.36075	0.593822	1.50924	0.220134	0.987722		2.06061	0.373559	1.29554	0.482427	0.991074		2.95105	0.705085	1.63024	0.169195	0.356045		2.80197	0.818513	1.76359	0.0989681	0.755729
LOCUS_04020		complement(301306..301617)	2.20775	-0.913187	-1.8832	0.227388	0.9999		2.86784	0.361817	1.28504	0.613907	ND		3.40843	0.617389	1.5341	0.339579	0.999997		3.89576	0.587108	1.50223	0.295784	0.653308		5.59254	1.21166	2.31605	0.0343167	0.617701		3.84689	0.643996	1.56265	0.263208	0.991074		3.06762	0.146428	1.10683	0.787725	0.884209		5.05925	1.05179	2.0731	0.0516535	0.612556
LOCUS_04030		complement(301584..302048)	2.88073	1.11084	2.15971	0.114422	0.9999		2.45024	0.885058	1.84684	0.251529	ND		2.46406	0.901896	1.86852	0.186434	0.999997		3.22864	1.12635	2.18306	0.104498	0.436126		3.40686	1.25485	2.38643	0.0263076	0.532402		4.37186	1.5742	2.97771	0.00847112	0.446836		3.57734	1.11846	2.17115	0.0561484	0.177332		2.61101	0.854271	1.80784	0.143146	0.831876
LOCUS_04040		complement(302048..302383)	1.44948	-0.770789	-1.7062	0.388067	0.9999		1.44948	-0.761709	-1.6955	0.367102	ND		1.44948	-0.78238	-1.71997	0.401728	0.999997		2.05227	0.286198	1.21942	0.66706	0.877166		1.44948	-0.218454	-1.16349	0.776908	0.990545		1.44948	-0.523233	-1.43717	0.484869	0.991074		2.72629	0.576986	1.49173	0.343953	0.543259		1.44948	-0.134052	-1.09737	0.858888	0.993691
LOCUS_04050		complement(302362..302928)	2.28836	-0.456592	-1.3723	0.498604	0.9999		2.28836	-1.28784	-2.44163	0.0592539	ND		2.28836	-0.482992	-1.39764	0.4732	0.999997		2.28836	-0.413974	-1.33235	0.435438	0.753179		2.28836	-0.250021	-1.18922	0.62418	0.990545		2.28836	-0.8616	-1.81705	0.10061	0.991074		2.71537	-0.0756617	-1.05384	0.880085	0.937229		2.28836	-0.878336	-1.83825	0.101423	0.759708
LOCUS_04060		complement(303579..305576)	1.40142	-0.0141783	-1.00988	0.979456	0.9999		1.66838	0.236862	1.17843	0.658226	0.99997		1.39959	-0.122085	-1.08831	0.831589	0.999997		3.48816	1.0922	2.13199	0.00371945	0.0715782		2.19597	0.53556	1.4495	0.182595	0.974301		1.82107	0.232953	1.17524	0.573114	0.991074		3.99752	1.18971	2.28106	0.00246211	0.0191824		2.91667	0.927736	1.90229	0.0210053	0.397931
LOCUS_04070		complement(306039..306629)	11.8833	0.746031	1.67717	0.195644	0.9999		8.77977	0.364686	1.2876	0.544561	0.99997		7.06051	0.0108399	1.00754	0.98418	0.999997		10.4208	0.35166	1.27603	0.331745	0.679498		9.75739	0.366831	1.28952	0.377863	0.989854		10.069	0.374439	1.29634	0.407477	0.991074		10.8436	0.30963	1.23939	0.420994	0.613003		9.17869	0.264094	1.20088	0.539563	0.959038
LOCUS_04080		complement(306747..307250)	11.8327	0.581751	1.49667	0.310025	0.9999		8.60847	0.155778	1.11402	0.784509	0.99997		7.79247	-0.0792332	-1.05646	0.882213	0.999997		9.16227	0.00861549	1.00599	0.98175	0.99477		7.98017	-0.0808203	-1.05762	0.829142	0.990545		8.04429	-0.103737	-1.07455	0.790927	0.99192		8.67033	-0.17043	-1.12539	0.643926	0.786186		11.7264	0.451795	1.36774	0.288292	0.920983
LOCUS_04090		complement(307250..307420)	4.27649	0.818499	1.76357	0.275823	0.9999		4.27083	0.827597	1.77473	0.280659	ND		2.37221	-0.136113	-1.09894	0.861568	0.999997		2.60649	-0.0889128	-1.06357	0.897327	0.969396		2.38064	-0.0985456	-1.07069	0.902047	0.990545		2.90458	0.13902	1.10116	0.845936	0.99192		3.65302	0.288846	1.22166	0.656124	0.795236		4.26014	0.69805	1.62231	0.303687	0.924605
alsC		complement(307451..308374)	7.97562	1.22198	2.33266	0.0462716	0.9999		4.65329	0.539584	1.45355	0.281895	0.99997		3.54436	0.143676	1.10472	0.785913	0.999997		7.45344	0.992944	1.99024	0.00795392	0.120511		8.35756	1.26589	2.40476	0.00172185	0.0696921		5.20712	0.548227	1.46229	0.169265	0.991074		7.15975	0.835784	1.78483	0.0164018	0.0762522		8.45478	1.26468	2.40273	0.00236647	0.0808597
LOCUS_04110		complement(308408..308857)	6.84499	0.659122	1.57912	0.2422	0.9999		4.42274	0.0548715	1.03877	0.921458	0.99997		4.23136	-0.213951	-1.15986	0.747646	0.999997		5.66586	0.197127	1.14641	0.652941	0.871096		6.40852	0.483096	1.39774	0.294827	0.989854		4.8886	0.0551898	1.039	0.901791	0.991929		6.83984	0.368203	1.29074	0.344602	0.543498		7.19524	0.629953	1.54751	0.133436	0.831876
LOCUS_04120		complement(309061..309573)	5.75522	1.07188	2.10217	0.108362	0.9999		3.55496	0.508626	1.42269	0.433917	0.99997		2.52521	-0.589745	-1.50498	0.337332	0.999997		3.31898	0.166237	1.12213	0.739193	0.910877		2.52521	-0.300967	-1.23197	0.54435	0.989854		3.14611	0.165318	1.12141	0.753872	0.991074		3.32774	0.0707524	1.05026	0.88619	0.940977		2.91917	0.0732964	1.05212	0.887946	0.993691
LOCUS_04130		complement(309552..309935)	4.6381	0.430063	1.34729	0.53576	0.9999		3.26757	-0.246338	-1.18619	0.716799	0.99997		3.26757	-0.844959	-1.79621	0.173682	0.999997		3.26757	-0.650185	-1.56937	0.225589	0.594098		3.26757	-1.71834	-3.29057	0.00764002	0.240218		3.26757	-1.06173	-2.08743	0.0686924	0.991074		3.26757	-0.430079	-1.34731	0.409854	0.602804		3.26757	-1.48577	-2.80066	0.0196886	0.381683
LOCUS_04140		complement(310063..310371)	15.5178	0.883383	1.8447	0.112592	0.9999		10.6322	0.362655	1.28579	0.552791	0.99997		8.11066	-0.0365274	-1.02564	0.952803	0.999997		9.70679	-0.00647665	-1.0045	0.988387	0.99626		8.11066	-0.615087	-1.53165	0.199982	0.987722		8.11066	-0.214251	-1.1601	0.63448	0.991074		9.02221	-0.209342	-1.15616	0.65368	0.793279		8.11066	-0.700004	-1.62451	0.183054	0.859667
LOCUS_04150		complement(310394..310612)	16.3026	0.284608	1.21808	0.628111	0.9999		12.7387	-0.0940279	-1.06735	0.876774	0.99997		12.7387	-0.513006	-1.42702	0.392233	0.999997		12.7387	-0.385941	-1.30671	0.383349	0.720135		12.7387	-0.669436	-1.59045	0.185047	0.974608		12.7387	-0.381921	-1.30308	0.39285	0.991074		12.7387	-0.496123	-1.41042	0.302117	0.504277		12.7387	-0.636224	-1.55426	0.208847	0.879463
LOCUS_04160		complement(311275..311658)	40.6522	0.0641911	1.0455	0.906098	0.9999		38.6532	0.0203511	1.01421	0.969841	0.99997		39.158	0.0630857	1.0447	0.909839	0.999997		38.0388	-0.38875	-1.30926	0.325025	0.675332		42.3745	0.0183567	1.01281	0.967224	0.995885		38.0388	-0.345793	-1.27085	0.397032	0.991074		38.0388	-0.759939	-1.69342	0.047362	0.158906		46.7052	0.135187	1.09824	0.770959	0.978421
LOCUS_04170		complement(311613..311969)	37.258	0.314259	1.24337	0.537827	0.9999		29.3459	-0.0331406	-1.02324	0.948355	0.99997		36.5051	0.341527	1.2671	0.519891	0.999997		29.3459	-0.394321	-1.31432	0.332637	0.679571		34.9806	0.105469	1.07584	0.818545	0.990545		29.3459	-0.412766	-1.33124	0.383535	0.991074		29.3459	-0.667802	-1.58865	0.0980505	0.252663		37.3102	0.176589	1.13021	0.691378	0.965584
rpiB		312294..312743	4.23883	0.582115	1.49704	0.352982	0.9999		3.3341	0.251361	1.19033	0.69001	0.99997		2.79108	-0.0352754	-1.02475	0.956898	0.999997		3.78004	0.211875	1.15819	0.664715	0.876043		4.69506	0.632186	1.54991	0.206389	0.987722		3.04284	-0.0279852	-1.01959	0.957745	0.996072		5.17744	0.56405	1.47841	0.146763	0.326649		4.40773	0.522072	1.43602	0.297931	0.920983
LOCUS_04190		312811..313167	22.4425	1.04444	2.06256	0.0577879	0.9999		12.7367	0.232541	1.1749	0.673955	0.99997		53.1283	2.34085	5.06601	2.64829e-06	0.00033961		11.4618	-0.134844	-1.09797	0.709279	0.897316		12.3991	0.0882356	1.06307	0.818199	0.990545		11.4977	-0.0579002	-1.04095	0.878914	0.99192		14.0961	0.0644313	1.04567	0.86518	0.93161		13.378	0.177897	1.13123	0.637132	0.965113
phnP		complement(313195..313953)	14.9708	0.478869	1.39365	0.405948	0.9999		12.6348	0.236606	1.17822	0.680689	0.99997		25.986	1.28615	2.43877	0.0126866	0.484782		14.6209	0.250516	1.18963	0.513358	0.797719		13.2747	0.22038	1.16504	0.598399	0.990545		15.1809	0.377009	1.29865	0.400747	0.991074		16.6128	0.335036	1.26141	0.355116	0.553593		14.0775	0.285858	1.21914	0.506238	0.955457
phnO		complement(313955..314389)	13.8212	0.182581	1.13491	0.748176	0.9999		12.0027	-0.115702	-1.0835	0.839852	0.99997		15.2381	0.330513	1.25746	0.562338	0.999997		14.4357	0.0399149	1.02805	0.91711	0.972097		12.3262	-0.078158	-1.05567	0.840133	0.990545		15.0774	0.172259	1.12682	0.681406	0.991074		15.7732	0.0562321	1.03975	0.885115	0.940323		12.0027	-0.204313	-1.15214	0.608699	0.962359
LOCUS_04220		complement(314376..314711)	3.03074	0.235468	1.17729	0.736112	0.9999		2.65885	0.0612509	1.04337	0.925937	ND		3.40661	0.389131	1.3096	0.551544	0.999997		4.22147	0.506808	1.4209	0.346322	0.691589		4.10593	0.57057	1.48511	0.301786	0.989854		2.95644	0.0725132	1.05155	0.89786	0.991929		6.31522	0.985844	1.98047	0.0483539	0.160927		3.85566	0.467418	1.38263	0.38931	0.948039
LOCUS_04230		complement(314810..316066)	1.97039	0.45483	1.37062	0.421998	0.9999		1.58221	0.149907	1.1095	0.788341	0.99997		2.0185	0.504395	1.41853	0.339204	0.999997		3.25548	0.971109	1.96035	0.0118995	0.15002		3.13671	1.02691	2.03765	0.0175591	0.420737		1.57804	0.00706775	1.00491	0.988154	0.998389		4.27015	1.26253	2.39916	0.000605156	0.00632723		3.28435	1.07409	2.1054	0.0128372	0.301171
LOCUS_04240		complement(316063..316743)	2.43514	-0.0999061	-1.0717	0.875849	0.9999		2.80126	0.190472	1.14114	0.739081	0.99997		2.70414	0.144693	1.1055	0.815501	0.999997		3.21438	0.160135	1.11739	0.729776	0.905278		2.98352	0.174265	1.12839	0.715506	0.990545		3.29664	0.266924	1.20324	0.591261	0.991074		5.37733	0.812327	1.75604	0.0680585	0.200925		2.73344	0.0149041	1.01038	0.976917	0.997777
LOCUS_04250		complement(316854..317399)	2.82048	-0.613063	-1.5295	0.360149	0.9999		2.82048	-0.164531	-1.1208	0.792485	0.99997		3.44796	0.28633	1.21953	0.634887	0.999997		5.85717	0.827726	1.77489	0.0583994	0.338521		3.19766	0.06785	1.04815	0.894087	0.990545		2.82048	-0.276948	-1.21163	0.595271	0.991074		6.78329	0.938683	1.91678	0.0338958	0.128474		3.8544	0.315866	1.24476	0.511579	0.955457
LOCUS_04260		complement(317608..318453)	1.63428	0.214508	1.16031	0.753886	0.9999		1.38989	-0.275227	-1.21018	0.670452	0.99997		1.54879	0.153828	1.11252	0.810897	0.999997		2.73062	0.746131	1.67729	0.114038	0.45001		2.0656	0.455283	1.37105	0.379116	0.989854		1.61729	0.0677251	1.04806	0.90145	0.991929		4.57434	1.38907	2.6191	0.000976392	0.00927027		2.34425	0.617762	1.53449	0.212999	0.887421
LOCUS_04270		complement(318446..319510)	3.19336	-0.121661	-1.08799	0.824538	0.9999		3.35344	0.0621861	1.04405	0.894229	0.99997		3.19336	-0.0400759	-1.02817	0.939108	0.999997		7.49497	1.00378	2.00525	0.0117835	0.14905		4.12149	0.251735	1.19064	0.507799	0.989854		3.70035	0.0590887	1.04181	0.876234	0.99192		11.0188	1.4598	2.7507	0.000320857	0.0038619		4.44684	0.342035	1.26754	0.381549	0.948039
phnH		complement(319510..320094)	2.63033	-0.0527882	-1.03727	0.933701	0.9999		2.63033	-0.251319	-1.19029	0.690208	0.99997		2.63033	-0.189419	-1.1403	0.769319	0.999997		5.4023	0.809282	1.75234	0.0619315	0.349968		3.47178	0.283874	1.21746	0.563497	0.990494		2.97786	0.0257436	1.018	0.960035	0.996072		10.7394	1.69924	3.2473	1.90748e-05	0.000350454		3.39025	0.230145	1.17295	0.630055	0.964103
LOCUS_04290		complement(320091..320330)	1.51723	-0.179532	-1.13252	0.824884	0.9999		2.02961	0.400035	1.31954	0.598332	ND		2.04536	0.416869	1.33503	0.589894	0.999997		5.05773	1.48336	2.79599	0.0267552	0.230971		1.51981	-0.131694	-1.09558	0.881485	0.990545		1.71951	0.0293407	1.02055	0.969226	ND		7.10943	1.87228	3.66111	0.00210547	0.0169569		1.85522	0.147788	1.10787	0.839381	0.992294
LOCUS_04300		complement(320317..320541)	0.722928	0.373204	1.29523	0.748726	0.9999		0.721638	0.381586	1.30277	0.734604	ND		0.911472	0.751027	1.68299	0.548419	0.999997		1.26081	0.934047	1.91063	0.364417	0.70861		1.08347	0.833196	1.78163	0.427866	ND		0.728077	0.305113	1.23552	0.818264	ND		2.58896	1.84713	3.59784	0.0390339	0.140849		0.719552	0.252538	1.1913	0.831537	ND
LOCUS_04310		320512..320733	1.64703	-0.0137111	-1.00955	0.98691	0.9999		1.64582	-0.169811	-1.12491	0.840663	ND		2.02728	0.294501	1.22646	0.708761	0.999997		3.4662	0.834202	1.78287	0.19499	0.558366		1.64582	-0.10916	-1.0786	0.8984	0.990545		1.67916	-0.118237	-1.08541	0.877621	ND		5.80674	1.47216	2.77437	0.0228725	0.0973077		1.64582	-0.29922	-1.23048	0.699932	0.966083
LOCUS_04320		complement(320832..321266)	1.48942	0.0769989	1.05482	0.914518	0.9999		1.49624	0.0861609	1.06154	0.907271	ND		1.40898	-0.0253857	-1.01775	0.974742	0.999997		3.25824	0.985362	1.97981	0.0759028	0.386341		2.52279	0.727814	1.65613	0.220268	0.987722		1.43146	-0.11808	-1.08529	0.846938	0.99192		6.21807	1.81292	3.51352	0.000179874	0.00235749		2.04728	0.410566	1.32921	0.478399	0.955457
LOCUS_04330	phnE_2	complement(321287..322066)	1.1945	-0.720086	-1.64728	0.321858	0.9999		1.1945	-0.354552	-1.27859	0.608406	ND		1.1945	-0.504948	-1.41907	0.474927	0.999997		3.32468	1.24329	2.36738	0.0093613	0.130274		1.87625	0.531344	1.44528	0.305614	0.989854		1.48625	0.163221	1.11978	0.740962	0.991074		5.43997	1.85274	3.61186	3.44054e-05	0.000589598		2.0233	0.62105	1.53799	0.272711	0.917771
LOCUS_04340	phnE_1	complement(322171..322434)	0.458208	1.36419	2.57433	0.394585	0.9999		0.154124	-0.00704507	-1.0049	0.996927	ND		0.310198	0.857919	1.81242	0.594971	ND		1.07149	2.31307	4.96939	0.125375	0.468165		0.615611	1.6539	3.14682	0.267253	ND		0.62052	1.64257	3.12222	0.31009	ND		4.57102	4.26096	19.1724	0.00141143	0.0123995		0.766218	1.93545	3.82498	0.211162	ND
LOCUS_04350		complement(322431..322949)	1.16961	-1.85767	-3.62421	0.0441079	0.9999		1.16961	-0.726825	-1.65499	0.362513	ND		1.16961	-0.709288	-1.635	0.346065	0.999997		2.02873	0.559904	1.47417	0.350229	0.69449		1.16961	-1.64862	-3.13534	0.043021	0.691975		1.16961	-1.00498	-2.00691	0.207068	0.991074		4.16717	1.49218	2.81314	0.00819549	0.0468757		1.16961	-0.236817	-1.17839	0.739549	0.968441
phnC		complement(323210..323842)	2.10968	0.44725	1.36344	0.514164	0.9999		2.50066	0.750494	1.68237	0.231631	0.99997		1.4706	-0.185348	-1.13709	0.792279	0.999997		4.16054	1.26525	2.40369	0.00815273	0.121892		1.92353	0.269607	1.20548	0.619627	0.990545		2.0968	0.354065	1.27816	0.487733	0.991074		6.3106	1.7652	3.39922	6.49108e-05	0.00101041		2.1103	0.381505	1.3027	0.465876	0.955457
LOCUS_04370		complement(323848..323997)	1.61654	-1.4882	-2.80538	0.217873	0.9999		1.61654	-0.562228	-1.47655	0.607034	ND		1.61654	-1.46314	-2.75707	0.234871	0.999997		3.24055	0.747136	1.67846	0.318801	0.673426		1.89346	0.103753	1.07456	0.910095	0.990767		2.48516	0.446496	1.36273	0.584244	ND		6.10399	1.54691	2.92192	0.0231663	0.0983122		1.6194	-0.134739	-1.09789	0.880169	0.993691
LOCUS_04380		complement(324129..324503)	25.4456	0.150843	1.11022	0.832261	0.9999		23.4367	0.0793715	1.05656	0.905565	0.99997		22.2348	-0.0186598	-1.01302	0.977765	0.999997		44.0592	0.830334	1.7781	0.0898578	0.41404		35.6236	0.635365	1.55333	0.187185	0.978701		37.3877	0.672845	1.59421	0.152364	0.991074		57.8179	1.1244	2.18011	0.0100253	0.0542658		37.0146	0.669355	1.59036	0.169766	0.852245
LOCUS_04390		complement(324763..325065)	499.1	-0.295578	-1.22738	0.515236	0.9999		499.1	-0.118158	-1.08535	0.801334	0.99997		499.1	-0.155315	-1.11366	0.748398	0.999997		499.1	-0.838958	-1.78876	0.00811541	0.121632		499.1	-0.487024	-1.40155	0.204221	0.987722		499.1	-0.49142	-1.40583	0.175373	0.991074		499.1	-1.01409	-2.01963	0.0049487	0.0323827		499.1	-0.454312	-1.37013	0.19326	0.863495
LOCUS_04400		325463..325852	15.7926	0.253189	1.19184	0.671147	0.9999		14.4955	0.141897	1.10335	0.81423	0.99997		12.8882	-0.398818	-1.31843	0.523865	0.999997		56.8945	1.92264	3.79117	1.52774e-06	8.97843e-05		74.6821	2.42082	5.35476	4.1475e-10	2.97888e-08		21.7794	0.607937	1.52408	0.126219	0.991074		56.6671	1.82027	3.53146	6.34471e-06	0.000140152		83.7552	2.56842	5.93161	9.34467e-12	6.99261e-10
LOCUS_04410		325906..326214	10.1034	0.0930745	1.06664	0.877044	0.9999		15.9172	0.759074	1.6924	0.18817	0.99997		9.45548	-0.0699341	-1.04967	0.908291	0.999997		36.4282	1.75268	3.36985	0.000119161	0.00462129		51.6597	2.36123	5.13806	3.9156e-07	2.51629e-05		14.7485	0.524795	1.43873	0.208394	0.991074		41.2155	1.83392	3.56504	6.67079e-05	0.00102792		62.3515	2.61402	6.12209	1.10679e-08	7.39471e-07
LOCUS_04420		326207..326788	17.3395	0.167609	1.1232	0.786183	0.9999		15.1184	-0.0225469	-1.01575	0.970409	0.99997		15.1184	-0.340877	-1.26653	0.566898	0.999997		52.3109	1.58855	3.00747	0.000166919	0.00613106		59.8071	1.88843	3.70232	1.75301e-06	0.00010792		19.39	0.230041	1.17287	0.610318	0.991074		49.6986	1.41609	2.66862	0.000188858	0.00245901		68.8469	2.06959	4.19766	9.29444e-07	5.6089e-05
LOCUS_04430		326806..327315	18.2477	0.234932	1.17685	0.720978	0.9999		18.1743	0.285799	1.21909	0.629718	0.99997		14.7868	-0.151303	-1.11057	0.818145	0.999997		46.6787	1.45147	2.73487	0.000109898	0.00432793		51.1155	1.69221	3.23151	2.35351e-05	0.00133657		20.2271	0.314118	1.24325	0.476131	0.991074		46.4343	1.34568	2.54149	0.000560327	0.00593155		58.1699	1.85258	3.61145	1.34695e-06	8.05176e-05
LOCUS_04440		327312..327506	8.32392	0.0226581	1.01583	0.971134	0.9999		8.11234	-0.842367	-1.79299	0.255432	0.99997		8.11234	-1.01187	-2.01652	0.13111	0.999997		18.0633	0.929801	1.90501	0.0323903	0.25546		20.422	1.21529	2.32187	0.0120476	0.32689		8.11234	-0.445541	-1.36182	0.423197	0.991074		17.5001	0.784141	1.72207	0.0597779	0.184673		17.4366	0.968504	1.95681	0.0333455	0.505109
LOCUS_04450		327503..327682	26.2856	0.94998	1.93185	0.130828	0.9999		16.6995	0.420431	1.33833	0.453193	0.99997		12.3639	-0.810714	-1.75408	0.191416	0.999997		638.847	5.45938	43.9985	3.61854e-42	2.96806e-39		787.69	5.86893	58.4417	2.49773e-47	9.63074e-45		22.1561	0.680344	1.60252	0.113325	0.991074		411.845	4.72459	26.4388	5.79441e-43	6.32667e-40		886.475	6.01551	64.6917	2.57387e-54	1.92603e-51
LOCUS_04460	yjcZ_1	327741..328037	36.1874	0.475054	1.38997	0.504066	0.9999		24.0159	-0.0228439	-1.01596	0.968944	0.99997		24.0159	-1.20546	-2.30611	0.0417292	0.999997		840.944	4.90721	30.0067	5.37619e-52	1.36914e-48		1074.43	5.37051	41.3698	2.77884e-50	1.45413e-47		28.0794	0.0756504	1.05384	0.850616	0.99192		592.075	4.30413	19.7548	1.98947e-30	6.61108e-28		1212.39	5.52897	46.1726	1.18974e-52	5.56424e-50
LOCUS_04470	yjcZ_2	328096..328395	27.7428	0.720306	1.64753	0.333463	0.9999		15.6779	-0.4776	-1.39243	0.385851	0.99997		15.6779	-1.16563	-2.2433	0.0345217	0.999997		588.765	5.0076	32.169	1.09945e-32	2.79993e-30		693.588	5.3533	40.8792	7.66119e-65	1.87086e-61		19.0308	0.14443	1.10529	0.74545	0.991074		412.041	4.39357	21.0183	9.08406e-42	8.67869e-39		821.763	5.57876	47.7941	2.2839e-53	1.33808e-50
LOCUS_04480	proP_1	328667..328990	210.071	0.424682	1.34228	0.512293	0.9999		249.632	0.733586	1.66277	0.210739	0.99997		300.046	0.958477	1.94326	0.107174	0.999997		839.381	2.32329	5.00474	9.88996e-08	6.57038e-06		700.468	2.17493	4.51563	4.39849e-07	2.80203e-05		478.421	1.59643	3.02394	1.86357e-05	0.00500083		873.876	2.28648	4.87863	1.27242e-07	4.46107e-06		875.244	2.47665	5.56604	3.09942e-09	2.10845e-07
LOCUS_04490	proP_2	328998..330314	228.287	0.562213	1.47653	0.301699	0.9999		230.685	0.634794	1.55272	0.189526	0.99997		276.345	0.857443	1.81182	0.14914	0.999997		835.307	2.31887	4.9894	4.02258e-08	2.76869e-06		628.334	2.01848	4.05157	8.78213e-07	5.49897e-05		440.849	1.47833	2.78625	0.000478129	0.0724416		1024.81	2.51711	5.72435	2.44514e-06	6.08737e-05		817.429	2.38051	5.2072	2.76789e-09	1.90019e-07
LOCUS_04500		complement(330478..330681)	748.957	2.90722	7.50173	2.05398e-11	6.03158e-09		499.365	2.31503	4.97616	3.71799e-05	0.00916627		422.037	2.07448	4.21193	5.88117e-05	0.00473371		220.083	0.957558	1.94202	0.0205096	0.200375		178.286	0.761657	1.69544	0.074521	0.84511		175.498	0.713592	1.63988	0.0748445	0.991074		301.605	1.31708	2.49161	0.000175747	0.00231592		192.433	0.856165	1.81022	0.0276864	0.454336
LOCUS_04510		complement(330669..330899)	580.075	3.21298	9.27265	5.21511e-14	1.59269e-11		216.622	1.77723	3.42767	0.00150707	0.201257		240.742	1.92856	3.80675	6.54424e-05	0.0051045		123.727	0.801819	1.7433	0.0442711	0.298527		97.5166	0.56572	1.48013	0.152435	0.950786		99.6557	0.563326	1.47767	0.154806	0.991074		185.675	1.29464	2.45316	0.00144941	0.0125884		109.67	0.720281	1.6475	0.0590598	0.6478
LOCUS_04520		complement(330794..331207)	656.741	3.42751	10.7593	2.80237e-14	8.91503e-12		178.947	1.53642	2.90074	0.00114394	0.174586		198.514	1.69514	3.23808	0.00063293	0.0374121		89.2941	0.351732	1.27609	0.321088	0.674117		63.342	-0.0368873	-1.0259	0.926303	0.991829		76.1269	0.193211	1.14331	0.606868	0.991074		134.029	0.842296	1.7929	0.00813745	0.0467277		69.5058	0.0815109	1.05813	0.830457	0.989321
LOCUS_04530		complement(331249..331587)	1109.54	3.86146	14.535	3.95523e-21	1.67768e-18		152.879	1.00561	2.00779	0.0135827	0.99997		247.619	1.70652	3.26374	0.000299567	0.0197089		83.7401	-0.0747856	-1.0532	0.841259	0.949367		75.6512	-0.326869	-1.25429	0.358091	0.989854		75.6512	-0.18862	-1.13967	0.612767	0.991074		104.466	0.144821	1.10559	0.697053	0.825938		79.1555	-0.0658909	-1.04673	0.86204	0.993691
LOCUS_04540		complement(331588..332034)	1826.8	4.06495	16.7368	1.60191e-17	5.82409e-15		358.351	1.71483	3.28259	0.000107017	0.0244992		390.236	1.84668	3.59671	4.59143e-05	0.0039373		108.239	-0.43555	-1.35243	0.200227	0.564362		108.239	-0.390008	-1.3104	0.267741	0.989854		108.239	-0.180558	-1.13332	0.645515	0.991074		108.239	-0.334134	-1.26062	0.329676	0.530559		108.239	-0.256596	-1.19466	0.405584	0.948039
LOCUS_04550		complement(332028..332255)	1958.11	4.28001	19.4272	3.36613e-24	2.1417e-21		374.957	1.89472	3.7185	0.00012164	0.0268865		414.123	2.05132	4.14484	5.26155e-05	0.00428053		100.144	-0.531897	-1.44583	0.179785	0.540133		100.144	-0.433528	-1.35053	0.256461	0.989854		100.144	-0.177218	-1.1307	0.64796	0.991074		100.144	-0.70607	-1.63135	0.0268235	0.108517		100.144	-0.191451	-1.14191	0.616887	0.962755
LOCUS_04560		complement(332252..333328)	2319.23	4.60678	24.3657	1.01019e-23	5.93294e-21		414.108	2.11266	4.32487	8.65868e-06	0.00231259		409.921	2.11208	4.32314	1.49182e-05	0.00152529		94.1936	-0.81392	-1.75798	0.0471473	0.308924		94.1936	-0.820593	-1.76613	0.0102353	0.297147		94.1936	-0.461405	-1.37688	0.176354	0.991074		94.1936	-0.794369	-1.73432	0.0264376	0.107882		94.1936	-0.475364	-1.39027	0.0911436	0.744572
LOCUS_04570		complement(333409..333789)	2469.17	4.6698	25.4536	1.47678e-20	5.93434e-18		438.41	2.16591	4.48749	6.0191e-06	0.00175375		384.479	1.98691	3.96386	1.23022e-06	0.000178998		96.4116	-0.898353	-1.86394	0.0192708	0.191194		96.4116	-1.03922	-2.05512	0.00978984	0.288034		96.4116	-0.601888	-1.5177	0.0956051	0.991074		96.4116	-1.10647	-2.15318	0.00267114	0.0203342		96.4116	-0.673865	-1.59534	0.106285	0.772319
LOCUS_04580		complement(333995..334789)	18.4167	0.0649817	1.04607	0.905838	0.9999		17.5522	-0.100832	-1.07239	0.851145	0.99997		17.5522	-0.146271	-1.10671	0.795984	0.999997		17.5522	-0.487282	-1.4018	0.265181	0.629637		17.5522	-0.0776463	-1.05529	0.852053	0.990545		17.7651	-0.0839865	-1.05994	0.843979	0.99192		17.5522	-0.587309	-1.50244	0.173095	0.360776		17.5522	-0.543554	-1.45756	0.172567	0.855833
LOCUS_04590		complement(334681..335331)	21.0092	-0.0170363	-1.01188	0.975774	0.9999		22.5483	0.1142	1.08237	0.841928	0.99997		21.0092	-0.203699	-1.15165	0.731853	0.999997		21.0092	-0.858978	-1.81375	0.0698191	0.370445		22.0329	0.0221054	1.01544	0.95991	0.995544		23.2399	0.0660215	1.04683	0.880202	0.99192		21.0092	-1.06692	-2.09495	0.0153912	0.0731561		21.0092	-0.666703	-1.58744	0.154545	0.839597
LOCUS_04600		complement(335468..335815)	55.4139	-0.131079	-1.09511	0.794233	0.9999		55.4139	-0.0564882	-1.03993	0.909342	0.99997		55.4139	-0.246349	-1.1862	0.604258	0.999997		55.4139	-1.34155	-2.53424	0.000325121	0.0104807		55.4139	-0.432735	-1.34979	0.246376	0.989854		55.4139	-0.249598	-1.18888	0.510528	0.991074		55.4139	-1.89988	-3.73181	8.73995e-07	2.41153e-05		55.4139	-0.831134	-1.77908	0.0535172	0.621865
LOCUS_04610		335917..336117	65.1143	-0.0555279	-1.03924	0.917972	0.9999		65.1143	-0.245707	-1.18567	0.638063	0.99997		65.1143	-0.37298	-1.29503	0.427404	0.999997		65.1143	-1.27074	-2.41286	0.000990385	0.0253911		65.1143	-0.728436	-1.65684	0.0768811	0.854676		65.1143	-0.532131	-1.44606	0.19455	0.991074		65.1143	-1.94284	-3.84463	9.13818e-07	2.51234e-05		65.1143	-1.14518	-2.21173	0.00662251	0.191337
LOCUS_04620		complement(336559..337731)	5.84797	0.00408478	1.00284	0.994872	0.9999		5.80748	-0.1757	-1.12951	0.763314	0.99997		5.80748	-0.1521	-1.11119	0.8116	0.999997		7.59535	0.180861	1.13356	0.6835	0.886578		6.06041	-0.0359489	-1.02523	0.934555	0.993526		5.87156	-0.116022	-1.08374	0.774832	0.991074		10.3572	0.526469	1.4404	0.183558	0.372769		6.76321	0.104564	1.07517	0.81338	0.986318
LOCUS_04630		complement(337662..338828)	5.04409	0.177092	1.1306	0.752607	0.9999		4.41066	-0.250281	-1.18944	0.648492	0.99997		4.80216	0.109354	1.07875	0.845735	0.999997		7.08182	0.460696	1.37621	0.242354	0.610938		5.04686	0.0823744	1.05876	0.835565	0.990545		5.72448	0.225642	1.1693	0.584489	0.991074		7.95243	0.528237	1.44217	0.170856	0.358456		4.92511	0.0275821	1.0193	0.946076	0.995228
melR		complement(339023..339931)	13.6704	0.0453947	1.03197	0.950212	0.9999		13.2315	-0.244682	-1.18483	0.745464	0.99997		14.1722	0.124142	1.08986	0.867713	0.999997		13.2315	-1.26808	-2.4084	0.0302602	0.24544		13.2315	-0.598596	-1.51424	0.335281	0.989854		13.2315	-1.85193	-3.60983	0.00185872	0.169692		13.2315	-1.72191	-3.29872	0.00282882	0.0213105		13.2315	-0.496732	-1.41101	0.426989	0.950827
LOCUS_04650		340213..341064	6.49188	0.333416	1.25999	0.561406	0.9999		7.89656	0.679205	1.60126	0.268896	0.99997		5.43215	0.104445	1.07508	0.853882	0.999997		8.13576	0.461135	1.37662	0.261901	0.627535		5.6732	0.0437458	1.03079	0.909842	0.990767		6.14134	0.118673	1.08574	0.772216	0.991074		8.93584	0.489309	1.40377	0.178647	0.366649		6.36517	0.189906	1.14069	0.646238	0.965182
LOCUS_04660		341061..341567	12.7939	0.224289	1.1682	0.702718	0.9999		11.0577	0.0411127	1.02891	0.943154	0.99997		10.7984	-0.170586	-1.12552	0.773555	0.999997		16.2944	0.388822	1.30932	0.351549	0.696353		11.2163	-0.0392641	-1.02759	0.923369	0.991829		14.3156	0.274204	1.20933	0.480521	0.991074		14.5296	0.12784	1.09266	0.744974	0.856473		12.4539	0.0925154	1.06623	0.81957	0.987153
LOCUS_04670		complement(341564..341761)	16.7821	0.248465	1.18794	0.675421	0.9999		13.9322	-0.0997053	-1.07155	0.862348	0.99997		13.9322	-0.59467	-1.51013	0.306934	0.999997		18.6202	0.214919	1.16064	0.614492	0.8517		13.9322	-0.112749	-1.08129	0.812929	0.990545		15.5016	0.0212619	1.01485	0.960834	0.996072		13.9322	-0.350202	-1.27474	0.448039	0.635199		15.3315	0.0239461	1.01674	0.957885	0.996002
LOCUS_04680		complement(341784..342212)	20.1812	0.318529	1.24706	0.642912	0.9999		15.703	-0.067891	-1.04818	0.912971	0.99997		15.703	-0.252632	-1.19138	0.690565	0.999997		22.1976	0.333163	1.25977	0.489364	0.78556		19.5058	0.254279	1.19274	0.592049	0.990494		23.8577	0.506479	1.42058	0.28181	0.991074		19.6961	0.0580636	1.04107	0.898762	0.947252		17.2628	0.0562042	1.03973	0.907337	0.994151
LOCUS_04690		complement(342334..342906)	474.624	0.0117035	1.00815	0.979339	0.9999		468.334	-0.00313751	-1.00218	0.994508	0.99997		461.836	-0.451486	-1.36745	0.309003	0.999997		461.836	-0.885905	-1.84792	0.0182153	0.184656		461.836	-0.524183	-1.43812	0.115868	0.927511		461.836	-0.419533	-1.33749	0.308832	0.991074		461.836	-1.57079	-2.97067	1.7919e-05	0.000332414		461.836	-0.604567	-1.52052	0.057005	0.641456
LOCUS_04700		complement(342903..343619)	623.553	0.0159326	1.0111	0.974067	0.9999		613.478	0.00721541	1.00501	0.988336	0.99997		604.736	-0.428869	-1.34618	0.407447	0.999997		604.736	-0.956084	-1.94004	0.00967695	0.132021		604.736	-0.599214	-1.51489	0.116319	0.927511		604.736	-0.440593	-1.35716	0.227651	0.991074		604.736	-1.63255	-3.1006	7.17933e-06	0.000156329		604.736	-0.688276	-1.61136	0.0619619	0.648402
LOCUS_04710		complement(344056..344484)	265.278	0.0346814	1.02433	0.939407	0.9999		260.094	0.00960064	1.00668	0.982321	0.99997		257.493	-0.50692	-1.42101	0.212512	0.999997		257.493	-0.728428	-1.65683	0.0267394	0.230971		257.493	-0.376379	-1.29808	0.157996	0.952683		257.493	-0.236527	-1.17815	0.378748	0.991074		257.493	-1.35426	-2.55666	7.34525e-05	0.00110729		257.493	-0.568482	-1.48296	0.0271127	0.451858
LOCUS_04720		complement(344481..345395)	186.067	-0.101604	-1.07297	0.820788	0.9999		192.416	0.0428642	1.03016	0.916141	0.99997		186.067	-0.60783	-1.52397	0.180922	0.999997		186.067	-0.853963	-1.80746	0.0172133	0.179913		186.067	-0.514089	-1.42809	0.141799	0.948263		186.067	-0.481836	-1.39652	0.188887	0.991074		186.067	-1.5475	-2.9231	3.98994e-06	9.41207e-05		186.067	-0.860705	-1.81592	0.00932069	0.247329
dcuR		complement(345966..346526)	71.8369	-0.0776028	-1.05526	0.863437	0.9999		71.8369	-0.0657554	-1.04663	0.87147	0.99997		71.8369	-0.172571	-1.12707	0.690731	0.999997		74.5656	-0.142443	-1.10377	0.700403	0.89445		82.5526	0.115414	1.08329	0.751464	0.990545		85.59	0.133647	1.09706	0.724894	0.991074		71.8369	-0.471605	-1.38665	0.113469	0.277428		83.76	0.116234	1.0839	0.734209	0.968441
LOCUS_04740		complement(346529..346996)	103.742	-0.164676	-1.12091	0.71218	0.9999		103.742	-0.129441	-1.09387	0.777317	0.99997		103.742	-0.193043	-1.14317	0.660988	0.999997		103.742	-0.315628	-1.24455	0.371197	0.710621		112.772	0.0190438	1.01329	0.952459	0.994402		120.203	0.0761302	1.05419	0.82189	0.99192		103.742	-0.460087	-1.37562	0.20138	0.395152		105.339	-0.0977457	-1.0701	0.758685	0.972204
LOCUS_04750		complement(347107..347631)	50.9597	-0.616764	-1.53343	0.213198	0.9999		50.9597	-0.132824	-1.09644	0.769989	0.99997		50.9597	-0.455418	-1.37118	0.349733	0.999997		50.9597	-0.241504	-1.18222	0.537682	0.811475		50.9597	-0.112409	-1.08103	0.758389	0.990545		50.9597	-0.150877	-1.11024	0.68482	0.991074		50.9597	-0.578778	-1.49358	0.1602	0.345001		52.8859	-0.0606722	-1.04295	0.867777	0.993691
LOCUS_04760		complement(347822..348202)	93.0227	-0.609152	-1.52536	0.167932	0.9999		93.0227	-0.271009	-1.20665	0.575826	0.99997		93.0227	-0.23251	-1.17488	0.599624	0.999997		93.0227	-0.597122	-1.5127	0.0970033	0.425495		94.297	-0.0929098	-1.06652	0.773496	0.990545		93.0227	-0.181209	-1.13383	0.527974	0.991074		93.0227	-0.628561	-1.54602	0.0663038	0.198104		93.0227	-0.139381	-1.10143	0.684404	0.965584
LOCUS_04770		complement(348171..348326)	25.1889	-0.567185	-1.48163	0.300399	0.9999		25.1889	-0.128621	-1.09325	0.790315	0.99997		25.1889	-0.229503	-1.17243	0.655099	0.999997		25.1889	-0.536624	-1.45057	0.152451	0.505695		25.1889	-0.232969	-1.17525	0.545359	0.989854		25.3358	-0.139556	-1.10157	0.735756	0.991074		25.1889	-0.634724	-1.55264	0.0667936	0.19926		25.1889	-0.523468	-1.43741	0.233132	0.900717
yjdI		348487..348717	6.31072	-0.372998	-1.29504	0.580672	0.9999		6.31072	-0.129257	-1.09373	0.841362	0.99997		6.31072	-0.398931	-1.31853	0.544108	0.999997		6.31072	-0.583169	-1.49814	0.260285	0.626915		6.31072	-1.26735	-2.40718	0.0229051	0.490651		6.31072	-0.758387	-1.6916	0.180371	0.991074		6.31072	-0.412996	-1.33145	0.455357	0.6425		6.31072	-0.838717	-1.78846	0.141853	0.831876
LOCUS_04790		348729..349001	11.1653	0.064718	1.04588	0.904505	0.9999		10.6993	0.0156526	1.01091	0.978227	0.99997		10.5291	-0.0776963	-1.05533	0.893391	0.999997		10.5291	-0.264775	-1.20145	0.485674	0.78332		10.5291	-0.733337	-1.66248	0.112555	0.927511		10.5291	-0.433514	-1.35052	0.283038	0.991074		11.4296	-0.205677	-1.15323	0.615396	0.76529		10.5291	-0.306609	-1.2368	0.46411	0.955457
LOCUS_04800		complement(349128..349649)	7.38426	-0.000384252	-1.00027	0.999429	0.9999		7.29151	-0.0205235	-1.01433	0.966664	0.99997		7.29151	-0.237304	-1.17879	0.624288	0.999997		9.08145	0.0914551	1.06544	0.809648	0.938375		7.29151	-0.12515	-1.09062	0.749372	0.990545		7.38263	-0.133466	-1.09693	0.737126	0.991074		18.6491	1.02909	2.04074	0.00555371	0.0354612		7.29151	-0.213491	-1.15949	0.596351	0.960549
LOCUS_04810		complement(349631..351418)	2.49145	-0.253352	-1.19197	0.663102	0.9999		2.49145	-0.0999959	-1.07177	0.852378	0.99997		2.49145	-0.169512	-1.12468	0.74966	0.999997		4.59916	0.659017	1.57901	0.100168	0.430112		2.49145	-0.176772	-1.13035	0.654319	0.990545		2.71091	-0.0291468	-1.02041	0.944591	0.996072		7.1916	1.20383	2.3035	0.0025128	0.0194978		2.69319	-0.0267234	-1.0187	0.949383	0.995228
LOCUS_04820		complement(352424..352588)	17.0115	0.0608538	1.04308	0.913711	0.9999		15.9288	-0.207882	-1.15499	0.749381	0.99997		18.1191	0.171022	1.12586	0.762517	0.999997		15.9288	-0.844379	-1.79549	0.0686545	0.366029		15.9288	-0.43487	-1.35179	0.388058	0.989854		15.9288	-0.46894	-1.38409	0.317727	0.991074		15.9288	-1.04603	-2.06484	0.0233691	0.0988433		15.9288	-1.37594	-2.59537	0.0100904	0.261267
LOCUS_04830		352775..352993	35.4933	-0.144236	-1.10515	0.821337	0.9999		38.5469	0.110638	1.07971	0.849293	0.99997		37.3916	0.0715368	1.05084	0.898493	0.999997		39.0167	-0.0888346	-1.06351	0.835203	0.94724		35.4933	-0.188769	-1.13979	0.667163	0.990545		40.3434	0.0308199	1.02159	0.939451	0.996072		35.4933	-0.602932	-1.5188	0.102702	0.260273		35.4933	-0.256218	-1.19434	0.568692	0.960549
LOCUS_04840		353406..354122	3.21604	-0.0190406	-1.01329	0.976256	0.9999		3.22626	0.0473319	1.03335	0.929692	0.99997		3.10908	-0.183009	-1.13525	0.734346	0.999997		3.56088	-0.0275128	-1.01925	0.949077	0.983198		3.40112	0.0161936	1.01129	0.96939	0.995898		3.93662	0.188074	1.13924	0.629844	0.991074		4.58188	0.23911	1.18026	0.593542	0.747847		3.21813	-0.0824487	-1.05881	0.854942	0.993691
LOCUS_04850		354202..354375	1.866	-0.666105	-1.58678	0.486951	0.9999		1.866	-0.405668	-1.3247	0.651856	ND		1.88124	0.012	1.00835	0.988462	0.999997		1.866	-0.409685	-1.3284	0.596158	0.843453		1.86655	-0.109726	-1.07902	0.89282	0.990545		1.89498	-0.118542	-1.08564	0.885062	ND		2.15028	-0.119571	-1.08641	0.868171	0.932709		1.866	-0.786395	-1.72476	0.376396	0.947972
LOCUS_04860		354622..355029	5.75889	-0.345769	-1.27083	0.545226	0.9999		5.75889	-0.574672	-1.48934	0.300969	0.99997		5.75889	-0.229475	-1.17241	0.658018	0.999997		5.75889	-0.868109	-1.82527	0.0400146	0.28428		5.75889	-0.678987	-1.60102	0.134386	0.939794		5.90399	-0.11719	-1.08462	0.780562	0.991883		5.81318	-0.308853	-1.23872	0.436011	0.625127		5.75889	-0.632088	-1.54981	0.166704	0.851896
LOCUS_04870		355053..355559	7.98387	-0.231682	-1.1742	0.660574	0.9999		8.88258	0.147441	1.1076	0.789194	0.99997		7.98387	-0.122939	-1.08895	0.821611	0.999997		8.23054	-0.181589	-1.13413	0.624128	0.856456		7.98387	-0.154267	-1.11286	0.686448	0.990545		7.98387	-0.270148	-1.20593	0.495613	0.991074		10.5891	0.0816992	1.05826	0.816037	0.901817		7.98387	-0.303046	-1.23375	0.44757	0.955457
LOCUS_04880		355556..355930	6.15638	0.0603277	1.0427	0.920523	0.9999		7.25571	0.331725	1.25852	0.550332	0.99997		5.78487	0.0121919	1.00849	0.981643	0.999997		8.53525	0.350378	1.27489	0.354124	0.699459		6.07026	-0.0303465	-1.02126	0.943498	0.99363		5.85795	-0.117639	-1.08496	0.782715	0.99192		8.6551	0.271267	1.20687	0.524283	0.698875		6.69199	0.0908937	1.06503	0.831761	0.990041
LOCUS_04890		356085..356462	3.11288	-1.52207	-2.87204	0.0578135	0.9999		3.11288	-0.51443	-1.42843	0.445886	0.99997		3.11288	-0.589115	-1.50432	0.348841	0.999997		3.85994	0.0918016	1.0657	0.868672	0.9607		3.33385	-0.0122169	-1.0085	0.98168	0.997045		3.94746	0.192678	1.14288	0.728352	0.991074		3.63046	-0.0916136	-1.06556	0.872427	0.933785		3.11288	-0.37417	-1.29609	0.535651	0.958158
LOCUS_04900		356432..357148	5.54006	-0.378565	-1.30005	0.461557	0.9999		5.54006	-0.243283	-1.18368	0.616359	0.99997		5.54006	-0.0170607	-1.0119	0.975716	0.999997		5.54006	-0.607055	-1.52315	0.11512	0.451731		5.54006	-0.592334	-1.50768	0.127985	0.93128		5.54006	-0.408446	-1.32726	0.28532	0.991074		5.57007	-0.312624	-1.24196	0.394987	0.589396		5.54006	-0.304568	-1.23505	0.463106	0.955457
LOCUS_04910		358184..358561	3.2183	0.189966	1.14074	0.764245	0.9999		2.78559	-0.119475	-1.08634	0.85395	0.99997		3.89654	0.477359	1.39219	0.460948	0.999997		2.78559	-1.1048	-2.15068	0.0645143	0.355593		2.78559	-0.284786	-1.21823	0.610686	0.990545		2.96405	-0.0638259	-1.04523	0.890105	0.99192		2.78559	-0.459361	-1.37493	0.365424	0.563432		2.78559	-0.309558	-1.23933	0.549588	0.960549
LOCUS_04920		358701..358862	1.99404	-1.4117	-2.66051	0.201064	0.9999		1.99404	-1.90865	-3.75456	0.127048	ND		1.99404	-1.87079	-3.65734	0.13045	0.999997		1.99404	-0.624503	-1.54168	0.460225	0.770294		1.99404	-1.06757	-2.0959	0.279377	ND		1.99404	-2.87528	-7.33747	0.0585562	ND		1.99404	-1.25311	-2.38355	0.197421	0.390803		1.99404	-1.48587	-2.80086	0.168466	0.852245
LOCUS_04930		360026..360247	2.19381	-0.419101	-1.33709	0.609623	0.9999		2.5583	0.213616	1.15959	0.784367	ND		2.19381	-0.337263	-1.26336	0.693125	0.999997		2.73148	0.10914	1.07858	0.878275	0.962721		2.19381	-2.02417	-4.06759	0.043114	0.691975		2.26087	-0.0664256	-1.04712	0.933613	0.996072		2.19381	-0.854696	-1.80838	0.229131	0.427863		2.37084	-0.020831	-1.01454	0.978022	0.997777
LOCUS_04940		360219..360683	1.57117	0.244856	1.18497	0.71913	0.9999		1.30633	-0.20792	-1.15502	0.773062	ND		1.4089	0.103847	1.07464	0.881105	0.999997		1.56743	0.0356183	1.025	0.950157	0.983365		1.30633	-0.425873	-1.34339	0.496639	0.989854		1.61232	0.141201	1.10282	0.826205	0.99192		1.79007	0.124707	1.09029	0.815362	0.901332		1.30633	-0.70769	-1.63319	0.315094	0.927219
LOCUS_04950		360671..360817	0.55078	-0.014297	-1.00996	0.991892	0.9999		1.10455	0.911696	1.88126	0.44439	ND		0.83484	0.541277	1.45526	0.672433	0.999997		2.48277	1.81574	3.52039	0.105029	0.436374		0.55078	-3.28928	-9.77626	0.281197	ND		1.70719	1.3545	2.55708	0.284271	ND		1.98356	1.40161	2.64196	0.231325	0.429757		0.55078	-0.983175	-1.97681	0.55934	ND
LOCUS_04960		360798..361223	2.09257	-0.300339	-1.23143	0.675092	0.9999		2.66803	0.339718	1.26551	0.601343	0.99997		2.40047	0.194278	1.14415	0.75159	0.999997		2.66242	0.121227	1.08766	0.818773	0.942075		2.09257	-0.842783	-1.79351	0.209952	0.987722		2.09257	-0.184108	-1.13611	0.740716	0.991074		3.9079	0.571155	1.48571	0.290615	0.492462		3.04108	0.4013	1.3207	0.474684	0.955457
LOCUS_04970		361232..361456	4.68896	-0.250239	-1.1894	0.716103	0.9999		4.68896	-0.179582	-1.13256	0.792612	0.99997		4.68896	-0.226079	-1.16965	0.728271	0.999997		7.01459	0.369019	1.29147	0.514143	0.798222		4.68896	-0.556235	-1.47043	0.356703	0.989854		5.54426	0.0966003	1.06925	0.86196	0.99192		6.1011	0.0575868	1.04072	0.915523	0.957029		6.11756	0.270497	1.20622	0.649497	0.965182
LOCUS_04980		361350..361985	6.4931	-0.118312	-1.08546	0.826829	0.9999		7.08967	0.115697	1.0835	0.830663	0.99997		6.4931	-0.217837	-1.16299	0.685263	0.999997		9.03931	0.252076	1.19092	0.490846	0.787663		6.4931	-0.124417	-1.09007	0.741644	0.990545		7.10443	-0.0227024	-1.01586	0.958145	0.996072		11.4425	0.486711	1.40125	0.230198	0.428465		6.6189	-0.107016	-1.077	0.774497	0.979807
LOCUS_04990		362350..363150	13.1999	-0.0497198	-1.03506	0.922842	0.9999		15.2665	0.199441	1.14825	0.692241	0.99997		14.1029	0.0928905	1.0665	0.836895	0.999997		17.9002	0.216499	1.16191	0.602156	0.847388		15.3198	0.101416	1.07283	0.79275	0.990545		17.0854	0.221295	1.16578	0.565415	0.991074		23.3741	0.501875	1.41605	0.168537	0.355345		16.4726	0.186645	1.13811	0.618287	0.962755
LOCUS_05000		363147..363374	10.6862	0.0350723	1.02461	0.951057	0.9999		10.3108	-0.0861102	-1.0615	0.875451	0.99997		10.3108	-0.485204	-1.39978	0.380515	0.999997		13.6817	0.184635	1.13653	0.627371	0.857337		10.3108	-0.133703	-1.09711	0.751646	0.990545		12.748	0.153572	1.11232	0.705339	0.991074		16.613	0.364199	1.28717	0.384093	0.582043		10.3108	-0.184202	-1.13619	0.671479	0.965182
LOCUS_05010		363371..363913	16.79	-0.165271	-1.12138	0.781503	0.9999		16.79	-0.270983	-1.20663	0.637898	0.99997		16.79	-0.0994868	-1.07139	0.854816	0.999997		20.139	0.0406004	1.02854	0.915409	0.972094		16.79	-0.167059	-1.12277	0.684368	0.990545		16.9499	-0.135577	-1.09853	0.753407	0.991074		22.8323	0.122264	1.08844	0.728887	0.846639		16.79	-0.246384	-1.18623	0.563357	0.960549
LOCUS_05020		364127..364462	5.06474	0.324559	1.25228	0.623825	0.9999		3.99345	-0.00550704	-1.00382	0.993024	0.99997		5.35225	0.37442	1.29632	0.582417	0.999997		11.0863	1.24914	2.377	0.00368765	0.0711457		5.07332	0.237841	1.17923	0.659724	0.990545		8.14111	0.877399	1.83706	0.0623524	0.991074		14.4921	1.53458	2.89703	0.000540077	0.00578935		5.0599	0.211683	1.15804	0.674101	0.965182
LOCUS_05030		364624..364920	28.2957	-0.0521015	-1.03677	0.941002	0.9999		30.2913	0.0740927	1.0527	0.910639	0.99997		28.2957	-0.168859	-1.12417	0.802417	0.999997		28.2957	-0.85832	-1.81293	0.0831804	0.401081		28.2957	-1.27188	-2.41476	0.00857187	0.259494		28.2957	-0.989996	-1.98618	0.0374646	0.914058		28.2957	-0.977193	-1.96863	0.0350216	0.130698		28.2957	-1.09784	-2.14034	0.0257704	0.443029
LOCUS_05040		complement(365236..365730)	243.166	-0.114468	-1.08258	0.821394	0.9999		243.166	-0.0878515	-1.06279	0.858468	0.99997		243.166	-0.262709	-1.19973	0.588678	0.999997		243.166	-0.701957	-1.62671	0.0445795	0.298766		243.166	-0.57987	-1.49471	0.0744511	0.84511		243.166	-0.615557	-1.53215	0.0434804	0.947433		243.166	-0.971539	-1.96093	0.00297724	0.0220495		243.166	-0.647705	-1.56667	0.0398997	0.543842
LOCUS_05050		complement(365691..366752)	380.726	-0.032117	-1.02251	0.950196	0.9999		383.047	-0.00571915	-1.00397	0.990871	0.99997		380.726	-0.206011	-1.15349	0.70075	0.999997		380.726	-0.695953	-1.61995	0.0649568	0.356224		380.726	-0.55188	-1.46599	0.133776	0.937841		380.726	-0.591374	-1.50668	0.136041	0.991074		380.726	-1.03392	-2.04758	0.0061367	0.0384764		380.726	-0.588015	-1.50318	0.124748	0.824639
LOCUS_05060		complement(366989..367801)	6.4808	-0.254573	-1.19298	0.658739	0.9999		6.4808	-0.0726932	-1.05168	0.90085	0.99997		6.4808	-0.322926	-1.25086	0.560042	0.999997		7.76988	0.0402618	1.0283	0.917102	0.972097		7.64484	0.126241	1.09145	0.749928	0.990545		6.97076	-0.03865	-1.02715	0.924963	0.995435		10.5383	0.386705	1.3074	0.315716	0.516427		8.36364	0.23613	1.17783	0.542265	0.960549
LOCUS_05070		complement(367801..368478)	3.70314	-0.160323	-1.11754	0.777992	0.9999		3.70314	-0.530538	-1.44447	0.333341	0.99997		3.92155	0.0787774	1.05612	0.893248	0.999997		5.37622	0.312317	1.2417	0.402968	0.734029		6.17032	0.620069	1.53695	0.115785	0.927511		4.22655	0.0362381	1.02544	0.92684	0.995779		5.46169	0.235602	1.1774	0.554327	0.719417		4.59701	0.17695	1.13049	0.668273	0.965182
LOCUS_05080		complement(368498..369139)	14.3187	-0.134736	-1.09789	0.819244	0.9999		14.3187	-0.11113	-1.08007	0.846572	0.99997		14.3187	-0.346199	-1.27121	0.523769	0.999997		18.4857	0.143926	1.10491	0.720211	0.901671		16.2597	0.0681536	1.04837	0.86846	0.990545		16.8156	0.0780843	1.05562	0.859072	0.99192		25.338	0.499238	1.41347	0.177041	0.36433		16.7063	0.0879989	1.06289	0.837565	0.991613
LOCUS_05090		complement(369136..370431)	7.62995	-0.0501677	-1.03539	0.92729	0.9999		7.77702	0.013504	1.0094	0.978888	0.99997		7.62995	-0.200552	-1.14914	0.706772	0.999997		11.7509	0.401816	1.32117	0.331154	0.678834		8.6842	0.0753162	1.05359	0.848901	0.990545		10.452	0.305995	1.23627	0.436929	0.991074		17.6937	0.895327	1.86003	0.0140986	0.0691923		10.7113	0.359685	1.28315	0.345023	0.937303
LOCUS_05100		complement(370725..371060)	5.55205	-0.416249	-1.33445	0.533365	0.9999		5.55205	-0.204528	-1.15231	0.72028	0.99997		5.55205	-0.979394	-1.97164	0.147716	0.999997		6.5036	0.0176913	1.01234	0.969745	0.989298		5.55205	-0.309149	-1.23898	0.545959	0.989854		5.55205	-0.390801	-1.31112	0.466654	0.991074		13.0029	0.903149	1.87014	0.0334758	0.127228		5.55205	-0.298616	-1.22996	0.556522	0.960549
LOCUS_05110		complement(371075..371650)	5.41278	-0.0714094	-1.05074	0.894974	0.9999		5.92029	0.120174	1.08687	0.803061	0.99997		5.41278	-0.459569	-1.37513	0.432099	0.999997		9.48653	0.578277	1.49306	0.137891	0.485925		5.50293	-0.0913194	-1.06534	0.822312	0.990545		6.91471	0.199465	1.14827	0.598019	0.991074		20.2225	1.57476	2.97885	0.000119369	0.0016679		6.67537	0.167418	1.12305	0.701262	0.966083
LOCUS_05120		complement(371713..372057)	6.12322	0.0708815	1.05036	0.898868	0.9999		6.00411	0.0519254	1.03665	0.920896	0.99997		5.74907	-0.400775	-1.32022	0.526474	0.999997		10.4445	0.633769	1.55161	0.0985708	0.428617		5.74907	-0.474913	-1.38983	0.352111	0.989854		6.01425	-0.0889893	-1.06362	0.847087	0.99192		18.3305	1.34379	2.53818	0.000526996	0.0057119		5.74907	-0.225485	-1.16917	0.6319	0.964103
LOCUS_05130		complement(372416..373609)	27.3441	-0.0757009	-1.05387	0.893225	0.9999		27.6686	0.0315852	1.02213	0.958484	0.99997		27.6961	0.0127392	1.00887	0.982823	0.999997		48.4994	0.685222	1.60795	0.127677	0.470971		36.611	0.398368	1.31802	0.35002	0.989854		37.2227	0.383331	1.30435	0.36995	0.991074		68.904	1.09411	2.13481	0.019186	0.0858467		37.7265	0.413704	1.3321	0.329704	0.935939
LOCUS_05140		complement(373609..373953)	54.2509	0.0534793	1.03776	0.923266	0.9999		57.6322	0.165281	1.12138	0.767094	0.99997		54.2937	0.0742412	1.05281	0.893187	0.999997		99.5443	0.776502	1.71297	0.0678592	0.363311		77.4738	0.527943	1.44187	0.213167	0.987722		74.53	0.436279	1.35311	0.277491	0.991074		148.257	1.25287	2.38315	0.000786109	0.00777261		78.1241	0.516831	1.43081	0.228414	0.899962
LOCUS_t00090		complement(374569..374643)	0	ND	ND	ND	ND		0	ND	ND	ND	ND		0	ND	ND	ND	ND		0	ND	ND	ND	ND		0	ND	ND	ND	ND		0	ND	ND	ND	ND		0	ND	ND	ND	ND		0.539253	2.18443	4.54549	0.493577	ND
LOCUS_05150		complement(374749..375324)	55.5305	0.151395	1.11064	0.731886	0.9999		52.1115	0.0716282	1.0509	0.879437	0.99997		49.2245	-0.0433028	-1.03047	0.921541	0.999997		60.265	0.0686675	1.04875	0.846905	0.951662		56.7004	0.0893003	1.06385	0.788257	0.990545		59.4016	0.119972	1.08671	0.733676	0.991074		63.4346	0.0429895	1.03025	0.896558	0.946333		61.6281	0.191046	1.14159	0.630509	0.964103
LOCUS_05160		complement(375291..376094)	43.3362	0.099738	1.07158	0.819274	0.9999		40.176	0.0115278	1.00802	0.981564	0.99997		39.885	-0.086487	-1.06178	0.854448	0.999997		46.3973	0.0191969	1.0134	0.960457	0.985928		45.6256	0.104136	1.07485	0.750408	0.990545		46.938	0.109197	1.07863	0.716191	0.991074		49.7361	0.0201907	1.01409	0.945835	0.973308		47.3728	0.139975	1.10189	0.692278	0.965584
LOCUS_05170		complement(376225..377055)	57.2766	-0.0673874	-1.04782	0.877524	0.9999		57.2766	-0.205161	-1.15281	0.643644	0.99997		57.2766	-0.110416	-1.07954	0.808569	0.999997		66.4686	0.0177501	1.01238	0.957228	0.985928		59.846	-0.0209061	-1.0146	0.954217	0.994757		67.0991	0.105544	1.0759	0.779891	0.991877		75.3645	0.101041	1.07255	0.779693	0.881036		71.6978	0.219147	1.16405	0.512248	0.955457
cutA		complement(377031..377333)	66.724	0.11799	1.08522	0.843671	0.9999		70.1551	0.224385	1.16828	0.66531	0.99997		65.1999	0.108121	1.07782	0.836365	0.999997		86.871	0.34301	1.2684	0.400686	0.732881		82.1867	0.376409	1.29811	0.353335	0.989854		84.7844	0.386874	1.30756	0.323931	0.991074		80.8939	0.14245	1.10378	0.675585	0.809706		86.2881	0.424236	1.34186	0.300374	0.922626
dcuA		complement(377483..378691)	1144.81	-0.0337304	-1.02366	0.941859	0.9999		1144.81	-0.0663318	-1.04705	0.877518	0.99997		1144.81	-0.346694	-1.27164	0.475649	0.999997		1144.81	-0.766512	-1.70115	0.0281719	0.236737		1144.81	-0.677127	-1.59895	0.0453898	0.711702		1144.81	-0.537643	-1.4516	0.274016	0.991074		1144.81	-1.12194	-2.1764	0.0291455	0.114943		1144.81	-0.669749	-1.5908	0.0296323	0.47509
aspA		complement(378899..380158)	2722.41	0.083681	1.05972	0.862147	0.9999		2629.5	0.0370816	1.02604	0.935999	0.99997		2552.9	-0.235714	-1.17749	0.65107	0.999997		2552.9	-0.954915	-1.93847	0.00861	0.124166		2552.9	-0.825131	-1.7717	0.0219075	0.483417		2552.9	-0.706248	-1.63156	0.157834	0.991074		2552.9	-1.53497	-2.89782	0.00311091	0.0227746		2552.9	-0.87835	-1.83827	0.00863499	0.235824
LOCUS_05210		complement(380119..380376)	2896.37	-0.0147578	-1.01028	0.976906	0.9999		2924.8	0.0103111	1.00717	0.983653	0.99997		2896.37	-0.266196	-1.20263	0.625581	0.999997		2896.37	-1.0954	-2.13672	0.0110236	0.142988		2896.37	-0.884899	-1.84664	0.037629	0.651251		2896.37	-0.839217	-1.78908	0.078584	0.991074		2896.37	-1.76553	-3.4	0.000126438	0.00175384		2896.37	-0.97946	-1.97173	0.017093	0.35236
yjeH		complement(381159..382415)	18.3717	0.404545	1.32367	0.536698	0.9999		13.3983	-0.0909432	-1.06507	0.87522	0.99997		13.3983	-0.235655	-1.17744	0.685908	0.999997		17.43	0.214562	1.16035	0.626527	0.857337		19.7812	0.512908	1.42692	0.230203	0.989854		22.8224	0.679999	1.60214	0.112039	0.991074		18.3417	0.189881	1.14067	0.636406	0.780953		22.1852	0.653412	1.57288	0.129023	0.827942
groES		382688..382981	1153.01	-0.0228708	-1.01598	0.96429	0.9999		1124.59	-0.18094	-1.13362	0.730319	0.99997		1124.59	-0.410683	-1.32932	0.466177	0.999997		1124.59	-1.27061	-2.41264	0.00179168	0.0413547		1124.59	-0.915954	-1.88682	0.0183544	0.433755		1124.59	-0.584508	-1.49953	0.159765	0.991074		1124.59	-1.49601	-2.82061	0.000148881	0.00201397		1124.59	-0.710893	-1.63682	0.0620414	0.648402
LOCUS_05240		383025..383996	1439.47	-0.0864761	-1.06177	0.856929	0.9999		1439.47	-0.269704	-1.20556	0.568631	0.99997		1439.47	-0.422399	-1.34015	0.439222	0.999997		1439.47	-1.22439	-2.33656	0.00205429	0.0456999		1439.47	-0.949134	-1.93071	0.0177427	0.422953		1439.47	-0.673654	-1.59511	0.199241	0.991074		1439.47	-1.39117	-2.62291	0.00944333	0.0518122		1439.47	-0.772769	-1.70855	0.0395768	0.543842
LOCUS_05250		383993..384244	1012.24	-0.1272	-1.09217	0.790615	0.9999		1012.24	-0.258024	-1.19584	0.588214	0.99997		1012.24	-0.450926	-1.36692	0.380684	0.999997		1012.24	-1.16889	-2.24839	0.00488414	0.0854354		1012.24	-0.977048	-1.96843	0.0166003	0.40801		1012.24	-0.711305	-1.63728	0.10481	0.991074		1012.24	-1.26001	-2.39497	0.00295616	0.0219359		1012.24	-0.810554	-1.75388	0.0453052	0.579519
LOCUS_05260		384253..384669	920.565	-0.0787456	-1.0561	0.876108	0.9999		920.565	-0.269921	-1.20574	0.595387	0.99997		920.565	-0.390917	-1.31123	0.502035	0.999997		920.565	-0.998124	-1.9974	0.0112478	0.144669		920.565	-0.871365	-1.82939	0.0209937	0.47323		920.565	-0.612641	-1.52906	0.141453	0.991074		920.565	-1.11975	-2.17309	0.00539893	0.034799		920.565	-0.755174	-1.68783	0.0435032	0.568123
yjeI		384792..385157	92.4271	0.0435197	1.03063	0.923364	0.9999		89.3303	-0.0277361	-1.01941	0.956918	0.99997		97.3782	0.139874	1.10181	0.761154	0.999997		89.3303	-0.548181	-1.46224	0.115272	0.45196		89.3303	-0.464399	-1.37974	0.183458	0.974301		89.3303	-0.307843	-1.23786	0.397665	0.991074		89.3303	-0.587975	-1.50314	0.132149	0.305325		89.3303	-0.38233	-1.30345	0.305897	0.925982
yjeJ		complement(385207..386076)	29.0735	0.00641297	1.00446	0.989387	0.9999		28.6272	-0.134022	-1.09735	0.778908	0.99997		28.6272	-0.1435	-1.10458	0.777789	0.999997		34.261	0.0788054	1.05614	0.837913	0.94865		32.0699	0.0934071	1.06689	0.810196	0.990545		37.6417	0.289529	1.22224	0.469209	0.991074		43.4778	0.323972	1.25177	0.405201	0.598307		33.9628	0.157855	1.11563	0.686289	0.965584
LOCUS_05290		complement(386311..387153)	101.561	-0.0168595	-1.01175	0.967008	0.9999		101.561	-0.0283254	-1.01983	0.948652	0.99997		102.309	0.00728276	1.00506	0.986106	0.999997		120.601	0.0497257	1.03507	0.885135	0.965096		116.088	0.103766	1.07457	0.688762	0.990545		124.144	0.164368	1.12067	0.61124	0.991074		129.112	0.0486042	1.03426	0.879238	0.937072		119.984	0.132349	1.09608	0.607996	0.962359
LOCUS_05300		387380..387589	1699.77	-0.0823719	-1.05876	0.877136	0.9999		1707.95	-0.016474	-1.01148	0.973649	0.99997		1729.81	0.0476273	1.03356	0.932754	0.999997		1699.77	-0.894059	-1.8584	0.0157887	0.171344		1699.77	-0.679006	-1.60104	0.0667355	0.806772		1699.77	-0.708515	-1.63412	0.0733693	0.991074		1699.77	-1.06244	-2.08846	0.007422	0.0439399		1699.77	-0.825905	-1.77265	0.0174219	0.356198
LOCUS_05310		387586..387945	2591.09	-0.166677	-1.12247	0.748043	0.9999		2591.09	-0.090145	-1.06448	0.847352	0.99997		2591.09	-0.113858	-1.08212	0.835707	0.999997		2591.09	-0.851369	-1.80421	0.0435906	0.295857		2591.09	-0.794486	-1.73446	0.0599125	0.779003		2591.09	-0.73566	-1.66516	0.151429	0.991074		2591.09	-0.95384	-1.93702	0.0770031	0.216293		2591.09	-0.872373	-1.83067	0.0309702	0.48687
LOCUS_05320		388233..388379	88.0529	-0.113313	-1.08171	0.839145	0.9999		88.0529	-0.257564	-1.19546	0.655302	0.99997		88.0529	-0.0142054	-1.0099	0.97983	0.999997		123.166	0.313437	1.24266	0.438744	0.755574		110.269	0.266801	1.20314	0.521268	0.989854		118.9	0.335644	1.26194	0.416151	0.991074		139.832	0.396966	1.31674	0.345961	0.544855		110.957	0.252441	1.19122	0.577054	0.960549
sugE		388553..388870	127.936	-0.128028	-1.0928	0.824249	0.9999		127.936	-0.0432328	-1.03042	0.936806	0.99997		127.936	-0.0753118	-1.05359	0.89004	0.999997		185.219	0.39072	1.31105	0.371535	0.710621		176.202	0.43602	1.35287	0.328023	0.989854		183.784	0.457381	1.37305	0.313705	0.991074		187.249	0.306013	1.23629	0.500502	0.681751		182.643	0.459304	1.37488	0.278882	0.920983
LOCUS_05340		complement(388867..389148)	65.7645	-0.00771302	-1.00536	0.991699	0.9999		64.6937	-0.0820694	-1.05854	0.911866	0.99997		64.6937	-0.190909	-1.14148	0.77965	0.999997		85.1444	0.273316	1.20858	0.609998	0.849814		92.2984	0.506241	1.42034	0.34965	0.989854		108.498	0.709095	1.63478	0.188447	0.991074		99.3388	0.399075	1.31866	0.428164	0.617561		90.4176	0.452009	1.36794	0.398049	0.948039
LOCUS_05350		complement(389184..389399)	32.7034	0.35537	1.27931	0.70621	0.9999		25.0365	0.00768394	1.00534	0.992962	0.99997		29.316	0.226682	1.17014	0.795719	0.999997		47.8025	0.831807	1.77991	0.219345	0.589188		41.7213	0.751711	1.68379	0.270826	0.989854		55.1378	1.12443	2.18015	0.0896029	0.991074		58.2026	1.01871	2.0261	0.11438	0.27841		44.0286	0.803695	1.74557	0.240639	0.900717
LOCUS_05360		complement(389486..389905)	81.2669	-0.0421022	-1.02961	0.940053	0.9999		81.2669	-0.042923	-1.0302	0.937757	0.99997		81.2669	-0.244354	-1.18456	0.66733	0.999997		100.394	0.14584	1.10637	0.726926	0.903777		94.4929	0.171535	1.12626	0.650733	0.990545		123.687	0.524961	1.43889	0.207387	0.991074		96.6995	-0.00786792	-1.00547	0.98299	0.992026		109.08	0.354185	1.27826	0.356339	0.937916
LOCUS_05370		complement(389923..390216)	76.7446	0.157868	1.11564	0.77655	0.9999		76.0441	0.181455	1.13403	0.693932	0.99997		66.4602	-0.205398	-1.153	0.692127	0.999997		81.3049	0.0896192	1.06409	0.812771	0.940003		87.6035	0.301792	1.23267	0.422944	0.989854		99.1527	0.444674	1.36101	0.255765	0.991074		73.3246	-0.160577	-1.11773	0.613505	0.764013		90.7229	0.333988	1.26049	0.414588	0.948039
LOCUS_05380		complement(390315..390488)	105.312	0.0796525	1.05676	0.879705	0.9999		97.3787	-0.0521106	-1.03678	0.913127	0.99997		97.3787	-0.308134	-1.23811	0.560513	0.999997		108.308	-0.044806	-1.03154	0.911001	0.97126		113.513	0.128117	1.09287	0.724162	0.990545		116.696	0.123975	1.08973	0.750137	0.991074		102.572	-0.231598	-1.17413	0.55233	0.718057		117.7	0.154751	1.11323	0.677079	0.965423
frdD		complement(390680..391039)	1120.05	0.021762	1.0152	0.964739	0.9999		1140.91	0.0451299	1.03178	0.925295	0.99997		1091.11	-0.277796	-1.21234	0.58827	0.999997		1091.11	-0.619052	-1.53587	0.0926364	0.418287		1091.11	-0.360013	-1.28344	0.336993	0.989854		1091.11	-0.425975	-1.34348	0.268099	0.991074		1091.11	-1.05905	-2.08356	0.00341944	0.0245167		1091.11	-0.439778	-1.3564	0.234039	0.900717
LOCUS_05400		complement(391050..391238)	817.226	0.0340227	1.02386	0.942267	0.9999		819.287	0.0369683	1.02596	0.937089	0.99997		791.207	-0.226488	-1.16998	0.642386	0.999997		791.207	-0.604644	-1.5206	0.0718563	0.375262		791.207	-0.365682	-1.28849	0.31299	0.989854		791.207	-0.496404	-1.41069	0.158834	0.991074		791.207	-1.10428	-2.14991	0.00154445	0.0131891		791.207	-0.415982	-1.33421	0.248357	0.90219
LOCUS_05410		complement(391235..391396)	1217.16	-0.0292451	-1.02048	0.947359	0.9999		1232.72	-0.00198192	-1.00137	0.996177	0.99997		1217.16	-0.291766	-1.22414	0.499493	0.999997		1217.16	-0.657702	-1.57757	0.093818	0.421109		1217.16	-0.326181	-1.25369	0.369521	0.989854		1217.16	-0.402218	-1.32154	0.311092	0.991074		1217.16	-1.10297	-2.14796	0.000948957	0.00907744		1217.16	-0.440739	-1.3573	0.21114	0.88576
frdB		complement(391454..392188)	1247.08	-0.0104511	-1.00727	0.982312	0.9999		1268.7	0.00197095	1.00137	0.996328	0.99997		1247.08	-0.261673	-1.19887	0.602574	0.999997		1247.08	-0.673686	-1.59514	0.0786054	0.393305		1247.08	-0.369135	-1.29158	0.342345	0.989854		1247.08	-0.398416	-1.31806	0.41486	0.991074		1247.08	-1.15944	-2.23371	0.0134591	0.0671461		1247.08	-0.448848	-1.36495	0.227359	0.899652
LOCUS_05430		complement(392181..392789)	1172.54	0.0200539	1.014	0.96568	0.9999		1167.75	-0.000719259	-1.0005	0.998653	0.99997		1152.84	-0.238742	-1.17996	0.634821	0.999997		1152.84	-0.715969	-1.64259	0.06539	0.357097		1152.84	-0.322609	-1.25059	0.396637	0.989854		1152.84	-0.370259	-1.29258	0.412992	0.991074		1152.84	-1.22624	-2.33956	0.00565009	0.0359147		1152.84	-0.414205	-1.33256	0.260362	0.911693
LOCUS_05440		complement(392678..393691)	960.475	-0.000475745	-1.00033	0.999194	0.9999		982.804	0.016339	1.01139	0.96902	0.99997		960.475	-0.251705	-1.19061	0.610653	0.999997		960.475	-0.701812	-1.62655	0.0588477	0.339831		960.475	-0.330595	-1.25753	0.339961	0.989854		960.475	-0.370553	-1.29285	0.442574	0.991074		960.475	-1.31511	-2.48821	0.00694531	0.0420293		960.475	-0.424333	-1.34195	0.211238	0.88576
LOCUS_05450		complement(393774..393986)	861.565	0.0147791	1.0103	0.974047	0.9999		889.205	0.0449451	1.03164	0.907944	0.99997		861.565	-0.239867	-1.18088	0.585471	0.999997		861.565	-0.680463	-1.60265	0.0535106	0.326355		861.565	-0.346273	-1.27127	0.31616	0.989854		861.565	-0.366251	-1.289	0.307711	0.991074		861.565	-1.35512	-2.55819	0.000174722	0.00230639		861.565	-0.533509	-1.44745	0.146667	0.834482
LOCUS_05460		394309..395064	275.208	-0.250236	-1.1894	0.543629	0.9999		275.208	-0.101917	-1.0732	0.787186	0.99997		275.208	-0.254702	-1.19309	0.543163	0.999997		275.208	-0.502747	-1.41691	0.1564	0.51074		275.208	-0.128757	-1.09335	0.691656	0.990545		275.208	-0.1805	-1.13328	0.606304	0.991074		275.208	-0.621558	-1.53854	0.0756489	0.214045		275.208	-0.176571	-1.13019	0.585525	0.960549
LOCUS_05470		395061..395285	165.291	-0.274468	-1.20955	0.540561	0.9999		165.291	-0.0299258	-1.02096	0.939648	0.99997		165.291	-0.197318	-1.14656	0.642377	0.999997		165.291	-0.414028	-1.3324	0.274703	0.635202		189.081	0.0823698	1.05876	0.777707	0.990545		184.242	0.00747833	1.0052	0.980423	0.997314		165.291	-0.712746	-1.63892	0.025373	0.104915		174.485	-0.05318	-1.03755	0.857144	0.993691
yjeM		395548..397041	65.6215	0.00853003	1.00593	0.984181	0.9999		64.2415	-0.0131315	-1.00914	0.97498	0.99997		64.2415	-0.0847691	-1.06052	0.82684	0.999997		64.2415	-0.31154	-1.24103	0.348399	0.693169		66.2428	-0.066225	-1.04697	0.797103	0.990545		68.8347	-0.0482831	-1.03403	0.857997	0.99192		70.602	-0.182437	-1.1348	0.527451	0.700853		64.2415	-0.134878	-1.098	0.59492	0.960549
LOCUS_05490		complement(397445..399934)	33.1412	0.0260328	1.01821	0.948692	0.9999		32.717	0.0246183	1.01721	0.952213	0.99997		33	0.0444573	1.0313	0.916633	0.999997		44.1788	0.256225	1.19435	0.423192	0.746533		38.3402	0.160423	1.11761	0.561267	0.990494		39.9483	0.183542	1.13567	0.593362	0.991074		49.6414	0.326361	1.25385	0.247263	0.447191		42.1337	0.279689	1.21393	0.295442	0.920983
LOCUS_05500		complement(399952..400500)	39.3107	0.143357	1.10447	0.796497	0.9999		35.8254	0.0235134	1.01643	0.96243	0.99997		35.8427	0.020072	1.01401	0.967447	0.999997		42.3357	0.067203	1.04768	0.865019	0.958467		46.6743	0.317396	1.24608	0.425015	0.989854		54.0581	0.493983	1.40833	0.21324	0.991074		52.4584	0.279158	1.21349	0.454164	0.641621		46.0004	0.278149	1.21264	0.486829	0.955457
psd		complement(400756..401754)	240.716	-0.0175011	-1.0122	0.966339	0.9999		239.071	-0.0895325	-1.06403	0.820095	0.99997		248.041	0.050348	1.03551	0.907284	0.999997		248.037	-0.177311	-1.13077	0.584843	0.838469		248.465	-0.0688473	-1.04888	0.826336	0.990545		255.954	-0.0618216	-1.04378	0.876158	0.99192		243.655	-0.301966	-1.23282	0.370621	0.569493		264.412	0.00493201	1.00342	0.98772	0.997777
LOCUS_05520		complement(401850..402113)	178.796	-0.0637342	-1.04517	0.881104	0.9999		178.796	-0.075927	-1.05404	0.870257	0.99997		178.796	-0.0781078	-1.05563	0.860796	0.999997		185.941	-0.162977	-1.11959	0.641114	0.866002		197.424	0.032361	1.02268	0.924723	0.991829		201.628	0.0260158	1.0182	0.942729	0.996072		181.536	-0.295679	-1.22746	0.402824	0.596108		199.767	0.0305657	1.02141	0.923849	0.994151
LOCUS_05530		complement(402196..402612)	146.247	-0.0637299	-1.04516	0.895565	0.9999		146.247	-0.0149932	-1.01045	0.976428	0.99997		146.247	-0.0613422	-1.04344	0.902727	0.999997		153.575	-0.143492	-1.10458	0.692815	0.890046		147.695	-0.0933034	-1.06681	0.791441	0.990545		162.611	0.00927748	1.00645	0.973598	0.997314		147.08	-0.305629	-1.23596	0.340232	0.539501		167.532	0.0723316	1.05141	0.859635	0.993691
LOCUS_05540		complement(402579..402899)	159.342	-0.10506	-1.07554	0.800652	0.9999		159.342	-0.0175327	-1.01223	0.96619	0.99997		159.342	-0.104321	-1.07499	0.809354	0.999997		160.509	-0.214831	-1.16057	0.492375	0.789092		166.332	-0.0545424	-1.03853	0.860441	0.990545		170.107	-0.0596155	-1.04219	0.855789	0.99192		159.342	-0.406079	-1.32508	0.250635	0.451019		169.97	-0.0422865	-1.02974	0.89419	0.993691
orn		402994..403539	97.6013	-0.0130189	-1.00906	0.97644	0.9999		98.2511	-0.00847079	-1.00589	0.98522	0.99997		98.1279	0.0170523	1.01189	0.973491	0.999997		97.6013	-0.551576	-1.46569	0.129201	0.472973		97.6013	-0.339496	-1.26531	0.346201	0.989854		97.6013	-0.32879	-1.25596	0.389384	0.991074		97.6013	-0.820808	-1.76639	0.0261293	0.106964		97.6013	-0.437798	-1.35454	0.186439	0.859667
LOCUS_t00100		403747..403822	1.06111	0.83359	1.78211	0.624077	0.9999		3.74561	2.52962	5.77418	0.082086	ND		0.529948	-2.31937	-4.99115	0.464412	ND		0.534762	-0.224952	-1.16874	0.906268	0.97039		1.60901	1.25732	2.39052	0.44924	ND		0.529948	-2.46753	-5.53095	0.438337	ND		2.19562	1.44559	2.72373	0.375257	0.573592		0.532158	-0.135481	-1.09846	0.943019	ND
LOCUS_t00110		403859..403934	1.60613	-3.71473	-13.1294	0.225282	0.9999		1.60613	-3.7068	-13.0574	0.22442	ND		1.61476	0.0112461	1.00783	0.992747	0.999997		1.60613	-1.60271	-3.03713	0.327084	0.676664		3.20075	0.843026	1.79381	0.460435	ND		2.70813	0.571831	1.48641	0.632186	ND		3.29343	0.738388	1.66831	0.568693	0.730769		1.60613	-1.51336	-2.85474	0.362478	ND
LOCUS_t00120		403970..404045	0.530557	2.30729	4.94952	0.467075	0.9999		0.536394	2.3101	4.95919	0.466541	ND		0	ND	ND	ND	ND		1.60073	3.47286	11.1028	0.251927	0.621055		0	ND	ND	ND	ND		0	ND	ND	ND	ND		1.0921	2.86643	7.2926	0.353907	0.552249		1.59647	3.55881	11.7845	0.249836	ND
LOCUS_05560		complement(404479..404922)	69.4335	-0.00374997	-1.0026	0.993242	0.9999		69.0087	0.00341962	1.00237	0.994913	0.99997		68.852	-0.140089	-1.10197	0.765841	0.999997		133.805	0.761644	1.69542	0.0302068	0.24544		84.6113	0.20964	1.1564	0.532346	0.989854		84.8965	0.17985	1.13277	0.551006	0.991074		212.654	1.33164	2.51689	2.92197e-05	0.000512216		86.5959	0.224813	1.16863	0.535095	0.958158
LOCUS_05570		complement(404928..405458)	81.9751	-0.111846	-1.08061	0.79848	0.9999		81.9751	-0.179564	-1.13254	0.690344	0.99997		81.9751	-0.079642	-1.05676	0.855316	0.999997		130.953	0.467127	1.38235	0.137118	0.485221		102.232	0.220987	1.16553	0.538504	0.989854		92.5261	0.0382779	1.02689	0.921081	0.994892		177.184	0.804634	1.7467	0.00325358	0.0235665		96.1934	0.112613	1.08118	0.731058	0.968441
LOCUS_05580		405462..406298	18.4186	0.239442	1.18054	0.649012	0.9999		16.4849	0.0814449	1.05808	0.868192	0.99997		16.5815	0.0913586	1.06537	0.858301	0.999997		38.9551	1.10086	2.14483	0.00198793	0.0446699		18.5449	0.139666	1.10165	0.718656	0.990545		16.6454	-0.0533594	-1.03768	0.89126	0.99192		78.1953	2.00652	4.01811	1.44318e-12	9.67563e-11		17.0698	0.00103529	1.00072	0.997777	0.999246
LOCUS_05590		406422..406811	33.0101	0.0611458	1.04329	0.901028	0.9999		32.6953	0.0570167	1.04031	0.912924	0.99997		33.3838	0.0947394	1.06787	0.846665	0.999997		43.6276	0.25845	1.19619	0.476641	0.780336		37.8043	0.161025	1.11808	0.669898	0.990545		33.5211	-0.0502013	-1.03541	0.893752	0.991929		63.1648	0.692518	1.6161	0.0544316	0.174505		37.3596	0.124708	1.09029	0.737706	0.968441
LOCUS_05600		406961..407182	51.578	0.107044	1.07702	0.823147	0.9999		51.417	0.111081	1.08004	0.823029	0.99997		57.1612	0.271597	1.20714	0.561586	0.999997		65.6795	0.250838	1.1899	0.541074	0.813143		55.6119	0.119765	1.08656	0.758712	0.990545		56.8685	0.114051	1.08226	0.774933	0.991074		78.3415	0.405656	1.32469	0.305431	0.507585		56.3386	0.119708	1.08651	0.762311	0.973342
LOCUS_05610		407182..407421	72.5726	0.0585862	1.04144	0.911812	0.9999		83.0368	0.267919	1.20407	0.574438	0.99997		90.41	0.394503	1.31449	0.404794	0.999997		100.048	0.31588	1.24477	0.425672	0.746533		84.6312	0.185175	1.13695	0.599261	0.990545		85.9217	0.168154	1.12362	0.661515	0.991074		120.477	0.48635	1.4009	0.0913322	0.24154		89.7263	0.24887	1.18828	0.46661	0.955457
LOCUS_05620		407440..408771	91.8136	-0.00805242	-1.0056	0.986128	0.9999		91.7305	0.00609903	1.00424	0.989671	0.99997		97.0344	0.0954387	1.06839	0.838003	0.999997		118.181	0.16285	1.1195	0.63295	0.860604		100.645	0.0392144	1.02755	0.905302	0.99069		111.456	0.149903	1.1095	0.649216	0.991074		141.284	0.320823	1.24904	0.31847	0.519519		108.843	0.133773	1.09716	0.685357	0.965584
LOCUS_05630		408781..408978	109.925	-0.0639075	-1.04529	0.903389	0.9999		109.925	-0.0932074	-1.06674	0.831895	0.99997		112.454	0.0410227	1.02884	0.93101	0.999997		122.318	-0.0571368	-1.0404	0.872276	0.961551		124.711	0.0808103	1.05761	0.814102	0.990545		140.469	0.2202	1.16489	0.564731	0.991074		130.929	-0.0579246	-1.04097	0.853202	0.924954		119.592	0.00405169	1.00281	0.991799	0.997777
LOCUS_05640		408950..409414	165.934	0.0749522	1.05333	0.851293	0.9999		156.066	-0.0234336	-1.01638	0.957336	0.99997		167.036	0.0940105	1.06733	0.826383	0.999997		182.462	0.00960905	1.00668	0.98096	0.994365		176.732	0.0706751	1.05021	0.837178	0.990545		186.34	0.11046	1.07957	0.768007	0.991074		191.743	-0.0181115	-1.01263	0.95544	0.977843		181.926	0.097534	1.06994	0.773811	0.979628
LOCUS_05650		409495..410124	138.226	-0.0120213	-1.00837	0.975791	0.9999		146.061	0.06791	1.0482	0.875146	0.99997		149.488	0.114956	1.08294	0.763462	0.999997		156.856	-0.0343694	-1.02411	0.924113	0.975218		163.397	0.133228	1.09674	0.604792	0.990545		163.405	0.0968318	1.06942	0.763005	0.991074		173.292	0.0104277	1.00725	0.971188	0.985239		168.839	0.162342	1.1191	0.53335	0.957022
LOCUS_05660		410117..410602	157.882	0.222647	1.16687	0.62592	0.9999		144.459	0.109873	1.07913	0.808735	0.99997		158.254	0.231971	1.17444	0.620474	0.999997		186.554	0.276827	1.21153	0.504699	0.796261		179.625	0.331664	1.25846	0.346908	0.989854		185.269	0.341121	1.26674	0.356233	0.991074		198.219	0.266428	1.20283	0.421525	0.613189		185.795	0.361923	1.28514	0.335198	0.936251
LOCUS_05670		410656..411159	323.7	0.0461005	1.03247	0.918445	0.9999		307.485	-0.00668071	-1.00464	0.988001	0.99997		330.203	0.102276	1.07347	0.818268	0.999997		368.188	0.0392281	1.02756	0.913764	0.972094		331.233	-0.00484194	-1.00336	0.988429	0.997406		336.739	-0.0183978	-1.01283	0.958537	0.996072		378.884	-0.0182495	-1.01273	0.953365	0.976883		338.996	0.0103647	1.00721	0.977195	0.997777
hfq		411722..411955	1325.73	-0.155462	-1.11378	0.759118	0.9999		1325.73	-0.111905	-1.08065	0.820223	0.99997		1325.73	-0.0864776	-1.06177	0.868558	0.999997		1325.73	-0.732276	-1.66126	0.0333345	0.259608		1325.73	-0.484079	-1.39869	0.140134	0.948263		1325.73	-0.453398	-1.36926	0.227282	0.991074		1325.73	-0.973584	-1.96371	0.0110615	0.0578667		1325.73	-0.477204	-1.39204	0.142409	0.831876
LOCUS_05690		412028..412279	521.708	0.00504209	1.0035	0.99081	0.9999		524.462	0.0224005	1.01565	0.961347	0.99997		528.211	0.0365359	1.02565	0.936237	0.999997		512.11	-0.265428	-1.20199	0.333794	0.67969		539.594	-0.047596	-1.03354	0.891308	0.990545		582.306	0.0246166	1.01721	0.941553	0.996072		512.11	-0.385231	-1.30607	0.271876	0.471939		553.153	-0.0277945	-1.01945	0.931384	0.994342
hflX		412309..413307	353.492	0.0357391	1.02508	0.938887	0.9999		338.038	-0.0174481	-1.01217	0.969839	0.99997		346.084	0.0306087	1.02144	0.952478	0.999997		352.825	-0.160291	-1.11751	0.635107	0.86231		372.847	0.027219	1.01905	0.933334	0.993526		395.694	0.0752486	1.05354	0.834424	0.99192		350.357	-0.269958	-1.20577	0.443475	0.631255		376.639	0.0241623	1.01689	0.944173	0.995228
LOCUS_05710		413393..413716	637.018	0.0519355	1.03665	0.898911	0.9999		601.419	-0.027598	-1.01931	0.942777	0.99997		611.757	0.0146031	1.01017	0.972456	0.999997		601.419	-0.332113	-1.25886	0.346494	0.691589		601.419	-0.131571	-1.09549	0.681475	0.990545		615.013	-0.136379	-1.09914	0.708224	0.991074		601.419	-0.454394	-1.37021	0.196185	0.389831		643.119	-0.0496187	-1.03499	0.880883	0.993691
LOCUS_05720		413710..414660	488.111	0.0610146	1.0432	0.898209	0.9999		459.676	-0.0121592	-1.00846	0.979572	0.99997		478.181	0.0590245	1.04176	0.906303	0.999997		464.646	-0.219735	-1.16452	0.546115	0.81504		461.226	-0.126617	-1.09173	0.727303	0.990545		481.309	-0.101535	-1.07291	0.794271	0.99192		479.917	-0.272942	-1.20827	0.512452	0.691746		491.545	-0.0483957	-1.03411	0.8907	0.993691
hflC		414653..415657	498.221	0.105605	1.07595	0.823812	0.9999		459.41	-0.00260342	-1.00181	0.995551	0.99997		477.896	0.0617197	1.04371	0.901361	0.999997		507.235	-0.0834766	-1.05957	0.81811	0.942075		463.166	-0.109809	-1.07909	0.760776	0.990545		490.909	-0.0622336	-1.04408	0.883227	0.99192		565.627	-0.025512	-1.01784	0.952675	0.976568		499.414	-0.0150368	-1.01048	0.965272	0.997462
yjeT		415737..415934	30.2575	-0.0308331	-1.0216	0.961055	0.9999		30.1207	-0.0541536	-1.03825	0.927442	0.99997		30.1207	-0.347167	-1.27206	0.583806	0.999997		42.5281	0.313101	1.24238	0.480845	0.781634		46.3707	0.549495	1.46357	0.234331	0.989854		38.8685	0.25751	1.19541	0.556275	0.991074		43.9215	0.26109	1.19838	0.548009	0.714384		44.1577	0.460847	1.37635	0.324521	0.930775
LOCUS_05750		416037..416231	676.033	-0.318423	-1.24697	0.543123	0.9999		676.033	-0.154306	-1.11289	0.759591	0.99997		676.033	-0.214506	-1.16031	0.670878	0.999997		676.033	-1.01274	-2.01774	0.00517462	0.0896465		676.033	-0.675793	-1.59747	0.0588353	0.774583		676.033	-0.819316	-1.76457	0.011698	0.523908		676.033	-1.19875	-2.2954	0.000178332	0.00234594		676.033	-0.752184	-1.68434	0.0307266	0.48431
purA		416255..417334	820.841	-0.246005	-1.18592	0.623189	0.9999		820.841	-0.184314	-1.13628	0.690112	0.99997		820.841	-0.170746	-1.12564	0.752297	0.999997		820.841	-1.01177	-2.01638	0.0159471	0.172232		820.841	-0.727357	-1.6556	0.0792326	0.85992		820.841	-0.750196	-1.68202	0.113118	0.991074		820.841	-1.14601	-2.21301	0.0188666	0.0850721		820.841	-0.844587	-1.79575	0.0352714	0.521532
LOCUS_05770		417735..417962	181.902	0.00623796	1.00433	0.990494	0.9999		179.443	-0.0184522	-1.01287	0.971131	0.99997		179.443	-0.0387641	-1.02723	0.93961	0.999997		262.43	0.387953	1.30854	0.344107	0.689058		259.326	0.4852	1.39978	0.253647	0.989854		282.088	0.57512	1.4898	0.155319	0.991074		298.115	0.476686	1.39154	0.267317	0.467208		269.458	0.519258	1.43322	0.1865	0.859667
LOCUS_05780		418001..418516	145.051	-0.00375164	-1.0026	0.993285	0.9999		142.655	-0.0802871	-1.05723	0.866024	0.99997		142.655	-0.0390179	-1.02741	0.935107	0.999997		205.413	0.339953	1.26572	0.413277	0.741742		174.914	0.22136	1.16583	0.515257	0.989854		192.665	0.32721	1.25458	0.383176	0.991074		224.139	0.369863	1.29223	0.31897	0.520028		182.452	0.262538	1.19959	0.427618	0.950827
LOCUS_05790		418492..419043	171.385	0.00297973	1.00207	0.994216	0.9999		168.731	-0.0754717	-1.05371	0.868146	0.99997		168.731	-0.0324615	-1.02276	0.937129	0.999997		239.935	0.31623	1.24507	0.347423	0.692128		193.078	0.113988	1.08222	0.687091	0.990545		211.697	0.214263	1.16011	0.451519	0.991074		308.613	0.5825	1.49744	0.111267	0.273972		194.9	0.109427	1.0788	0.708608	0.966083
LOCUS_05800		418992..420386	181.88	-0.00648059	-1.0045	0.988355	0.9999		180.045	-0.0294672	-1.02064	0.943561	0.99997		180.045	-0.040091	-1.02818	0.929909	0.999997		288.53	0.475142	1.39005	0.124005	0.465782		199.855	0.0538117	1.038	0.86325	0.990545		224.175	0.186112	1.13769	0.601617	0.991074		390.94	0.815246	1.7596	0.0500803	0.164444		214.796	0.141074	1.10273	0.641059	0.965182
LOCUS_05810		420666..420977	142.468	-0.0854294	-1.061	0.846159	0.9999		142.468	-0.122428	-1.08857	0.78471	0.99997		142.468	-0.115571	-1.0834	0.791399	0.999997		148.771	-0.172992	-1.12739	0.612642	0.851184		142.468	-0.263425	-1.20033	0.458302	0.989854		142.468	-0.31651	-1.24531	0.357219	0.991074		188.271	0.0659267	1.04676	0.860783	0.929363		142.468	-0.224291	-1.1682	0.498265	0.955457
LOCUS_05820		420944..421255	89.0841	-0.0847398	-1.0605	0.861597	0.9999		89.0841	-0.0919705	-1.06582	0.832656	0.99997		92.2663	0.0388096	1.02727	0.931936	0.999997		104.867	-0.0238776	-1.01669	0.947623	0.983169		89.0841	-0.240726	-1.18159	0.526095	0.989854		89.0841	-0.326602	-1.25406	0.385101	0.991074		132.831	0.220124	1.16483	0.511028	0.690683		89.0841	-0.373313	-1.29532	0.34447	0.937303
LOCUS_05830		421380..421781	5.7467	-0.145824	-1.10636	0.802442	0.9999		5.7467	-0.0824906	-1.05884	0.877222	0.99997		5.7467	-0.174713	-1.12874	0.741156	0.999997		5.7467	-0.222785	-1.16698	0.590259	0.840805		5.7467	-0.16014	-1.1174	0.700457	0.990545		5.7467	-0.221604	-1.16603	0.602502	0.991074		7.14576	-0.00806229	-1.0056	0.984588	0.9923		5.7467	-0.159196	-1.11666	0.719721	0.966083
yjfJ		421880..422497	6.95269	0.111415	1.08029	0.846718	0.9999		6.77464	0.0889908	1.06363	0.87232	0.99997		6.29386	-0.231956	-1.17443	0.629387	0.999997		9.56915	0.380727	1.302	0.289843	0.648525		7.62598	0.16331	1.11985	0.668679	0.990545		7.78032	0.155308	1.11366	0.718269	0.991074		12.3903	0.653324	1.57279	0.091728	0.242065		7.79443	0.175302	1.1292	0.653634	0.965182
LOCUS_05850		422659..423009	3.81367	-0.411724	-1.33027	0.538498	0.9999		4.7549	0.28452	1.21801	0.691482	0.99997		3.84597	0.0127175	1.00885	0.984461	0.999997		8.18254	0.893161	1.85724	0.0852445	0.402979		4.62799	0.166773	1.12255	0.748061	0.990545		5.2054	0.295628	1.22742	0.573552	0.991074		11.6184	1.2798	2.42806	0.00587451	0.0370759		4.61233	0.141974	1.10341	0.778488	0.980963
LOCUS_05860		422994..423203	1.92989	0.48545	1.40002	0.564837	0.9999		3.29348	1.23842	2.3594	0.14827	ND		2.14535	0.646123	1.56496	0.433687	0.999997		4.43711	1.45792	2.74712	0.0285194	0.237427		2.32173	0.647022	1.56593	0.402494	0.989854		2.76018	0.85655	1.8107	0.259438	0.991074		3.17119	0.879829	1.84016	0.181634	0.370393		2.69832	0.840611	1.79081	0.259471	0.909585
LOCUS_05870		423221..423610	3.2247	-0.108256	-1.07792	0.869272	0.9999		3.65135	0.162602	1.1193	0.808808	0.99997		3.2247	-0.185008	-1.13682	0.775914	0.999997		6.23252	0.724578	1.65242	0.117216	0.454418		3.54415	0.0240872	1.01684	0.963852	0.995885		3.2247	-0.31451	-1.24359	0.564656	0.991074		7.57345	0.905713	1.87347	0.0442959	0.152915		3.2247	-0.366633	-1.28934	0.540365	0.959267
LOCUS_05880		423782..424321	3.91459	0.259485	1.19705	0.644943	0.9999		3.22703	-0.299811	-1.23098	0.612442	0.99997		3.22703	-0.366363	-1.2891	0.54783	0.999997		5.99652	0.66873	1.58967	0.117409	0.454791		3.22703	-0.723486	-1.65117	0.178744	0.974301		3.70431	0.0599981	1.04246	0.90686	0.991929		8.39609	1.05318	2.0751	0.0104707	0.0558023		3.22703	-0.388742	-1.30925	0.41419	0.948039
yjfC		424287..425429	5.74668	-0.193343	-1.14341	0.743129	0.9999		5.74668	-0.0578094	-1.04088	0.919109	0.99997		5.74668	-0.315073	-1.24407	0.596283	0.999997		9.103	0.457516	1.37318	0.303155	0.661555		6.93547	0.186512	1.13801	0.682576	0.990545		6.64119	0.0702769	1.04992	0.858142	0.99192		13.7973	0.944443	1.92445	0.0128931	0.0650072		6.19695	-0.0108432	-1.00754	0.979539	0.997777
LOCUS_05900		425495..426283	4.5141	-0.225165	-1.16891	0.682881	0.9999		4.5141	-0.355985	-1.27986	0.477106	0.99997		4.5141	-0.179135	-1.13221	0.737099	0.999997		5.64906	0.0970038	1.06955	0.788577	0.931899		4.6853	-0.062508	-1.04428	0.877523	0.990545		4.5141	-0.387446	-1.30808	0.345364	0.991074		9.54938	0.745738	1.67683	0.0680144	0.200925		4.5141	-0.151779	-1.11094	0.728817	0.968441
LOCUS_05910		426229..426381	2.12626	0.15972	1.11707	0.863257	0.9999		1.85375	-0.0285897	-1.02001	0.977022	ND		1.84539	-1.17549	-2.2587	0.323225	0.999997		4.76728	1.10797	2.15542	0.137813	0.485925		2.39088	0.225615	1.16928	0.796492	0.990545		1.8874	-0.174362	-1.12847	0.85347	ND		5.16633	1.12366	2.179	0.106872	0.26664		1.84539	-0.410312	-1.32897	0.675779	0.965182
LOCUS_05920		426390..427136	5.9101	-0.322628	-1.25061	0.554315	0.9999		5.9101	-0.397795	-1.31749	0.440896	0.99997		5.9101	-0.397094	-1.31685	0.457379	0.999997		7.85862	0.187253	1.13859	0.607113	0.849069		6.03585	-0.0835777	-1.05964	0.826811	0.990545		5.9101	-0.315581	-1.24451	0.434735	0.991074		10.4129	0.493329	1.40769	0.162844	0.348166		5.9101	-0.14754	-1.10768	0.717221	0.966083
yjfN		complement(427253..427528)	49.9012	0.602335	1.51817	0.260472	0.9999		63.666	0.983592	1.97738	0.122076	0.99997		39.5134	0.311996	1.24142	0.615502	0.999997		32.669	-0.756205	-1.68904	0.103231	0.433582		32.669	-0.238098	-1.17944	0.605821	0.990545		32.669	-0.683732	-1.60629	0.13355	0.991074		32.669	-0.493824	-1.40817	0.253285	0.453574		35.3527	-0.0677474	-1.04808	0.894947	0.993691
bsmA		complement(427675..427944)	90.6377	0.294479	1.22644	0.68811	0.9999		108.941	0.561049	1.47534	0.465151	0.99997		97.8728	0.450911	1.3669	0.568399	0.999997		72.9297	-2.00914	-4.02541	0.000720646	0.0203961		72.9297	-1.15338	-2.22435	0.0511902	0.741237		72.9297	-2.21564	-4.64488	0.000108411	0.0227056		72.9297	-1.86634	-3.64607	0.00117583	0.0107885		72.9297	-1.18074	-2.26693	0.0718694	0.688718
yjfP		428269..428934	20.3773	-0.196031	-1.14554	0.710578	0.9999		20.3773	-0.203013	-1.1511	0.68387	0.99997		20.3773	-0.224197	-1.16813	0.646168	0.999997		20.3773	-0.381763	-1.30293	0.330711	0.678183		20.3773	-0.131025	-1.09507	0.727935	0.990545		23.5365	0.0574972	1.04066	0.877757	0.99192		20.4294	-0.317997	-1.2466	0.399862	0.593657		21.0882	-0.0828693	-1.05912	0.828279	0.988699
ulaR		complement(428931..429533)	31.4082	-0.302999	-1.23371	0.560636	0.9999		31.4082	-0.232312	-1.17472	0.626506	0.99997		31.4082	-0.129497	-1.09391	0.805449	0.999997		31.4082	-0.846237	-1.79781	0.0189368	0.188873		31.4082	-0.55338	-1.46752	0.150081	0.949704		31.4082	-0.363808	-1.28682	0.362526	0.991074		31.4082	-0.950442	-1.93246	0.0121814	0.0624848		31.4082	-0.654466	-1.57403	0.129508	0.827942
LOCUS_05970		complement(429479..429685)	15.0656	-0.445601	-1.36188	0.398414	0.9999		18.0242	0.268674	1.2047	0.569756	0.99997		15.0656	-0.221564	-1.166	0.71141	0.999997		15.0656	-1.06028	-2.08533	0.0120797	0.150977		15.0656	-0.166139	-1.12205	0.684814	0.990545		15.0656	-0.214087	-1.15997	0.595353	0.991074		15.0656	-1.26098	-2.39658	0.00283285	0.0213105		15.0656	-0.270752	-1.20644	0.55889	0.960549
LOCUS_05980		complement(429791..429961)	7.57806	-0.10632	-1.07648	0.87032	0.9999		7.57806	-0.0499481	-1.03523	0.935719	0.99997		9.10597	0.277855	1.21239	0.682722	0.999997		7.57806	-0.758915	-1.69222	0.135292	0.48188		7.57806	-0.931074	-1.90669	0.110807	0.927511		7.57806	-0.862217	-1.81783	0.0927834	0.991074		7.57806	-0.425109	-1.34267	0.428788	0.618112		7.57806	-0.325526	-1.25312	0.552492	0.960549
LOCUS_05990		complement(429937..430242)	7.17165	0.149027	1.10882	0.7993	0.9999		6.35831	-0.00283052	-1.00196	0.996297	0.99997		6.55558	0.0368757	1.02589	0.94985	0.999997		6.34343	-0.298346	-1.22973	0.517049	0.799639		6.34343	-0.758732	-1.692	0.167638	0.963435		6.34343	-0.716971	-1.64373	0.185068	0.991074		8.14927	-0.000819641	-1.00057	0.998752	0.998883		6.61312	-0.0858218	-1.06129	0.86565	0.993691
LOCUS_06000		complement(430224..430460)	9.04518	-0.518955	-1.43292	0.406164	0.9999		9.04518	-0.481695	-1.39638	0.428022	0.99997		9.04518	-0.285995	-1.21925	0.631777	0.999997		9.04518	-0.9632	-1.94963	0.0508902	0.317648		9.04518	-0.903103	-1.87008	0.126364	0.931229		9.04518	-0.541595	-1.45558	0.296016	0.991074		9.04518	-0.530254	-1.44418	0.231067	0.429486		9.04518	-1.11113	-2.16015	0.032073	0.493832
LOCUS_06010		431250..431882	3.98079	0.239485	1.18057	0.667806	0.9999		3.78979	0.168661	1.12401	0.761933	0.99997		3.32947	-0.13299	-1.09656	0.811618	0.999997		3.58355	-0.116383	-1.08401	0.77841	0.927328		4.10879	0.18938	1.14027	0.673362	0.990545		3.98959	0.112098	1.0808	0.797647	0.99192		4.99802	0.261821	1.19899	0.553655	0.719168		3.96552	0.133266	1.09677	0.787236	0.981364
LOCUS_06020		431921..432613	3.97646	-0.218383	-1.16343	0.686644	0.9999		3.97646	-0.0253484	-1.01773	0.962682	0.99997		3.97646	-0.487548	-1.40206	0.388164	0.999997		3.97646	-0.28771	-1.2207	0.450191	0.763985		4.39552	0.0317368	1.02224	0.93517	0.993526		3.97646	-0.15997	-1.11726	0.681262	0.991074		3.97646	-0.487481	-1.40199	0.275036	0.475026		3.97646	-0.412803	-1.33127	0.332022	0.936251
ulaB		432610..432921	6.22144	-0.4364	-1.35322	0.501993	0.9999		6.22144	-0.349552	-1.27416	0.547855	0.99997		6.22144	-0.40958	-1.3283	0.505381	0.999997		6.22144	-0.614956	-1.53151	0.207558	0.57347		6.25418	-0.1311	-1.09513	0.789075	0.990545		6.22144	-0.692256	-1.61581	0.223253	0.991074		6.93054	-0.192337	-1.14261	0.681119	0.813533		6.22144	-0.613259	-1.52971	0.268113	0.917771
LOCUS_06040		432931..433179	5.05855	0.236935	1.17849	0.71838	0.9999		4.2221	-0.245767	-1.18572	0.703884	0.99997		4.2221	-0.440226	-1.35682	0.506222	0.999997		4.38851	-0.175642	-1.12947	0.755283	0.917507		4.2221	-0.235406	-1.17724	0.699271	0.990545		4.2221	-0.642995	-1.56157	0.281177	0.991074		4.2221	-0.340912	-1.26656	0.532084	0.702734		6.01395	0.369847	1.29222	0.504866	0.955457
LOCUS_06050		433125..433394	7.22674	1.03925	2.05515	0.115118	0.9999		5.71941	0.712492	1.63863	0.274279	0.99997		3.49017	0.0124479	1.00867	0.984582	0.999997		4.95234	0.292415	1.22469	0.588497	0.840238		4.81836	0.362135	1.28533	0.492635	0.989854		3.4462	-0.247966	-1.18753	0.66735	0.991074		6.779	0.643876	1.56252	0.217129	0.414662		4.79633	0.337222	1.26332	0.5311	0.956953
ulaD		433408..434058	9.73402	0.281422	1.21539	0.614336	0.9999		8.35164	0.0751219	1.05345	0.896843	0.99997		8.04941	0.0235247	1.01644	0.966366	0.999997		8.21462	-0.168333	-1.12376	0.654043	0.871096		7.89843	-0.204252	-1.15209	0.622989	0.990545		8.77798	0.00096702	1.00067	0.998072	0.999616		10.2887	0.0569205	1.04024	0.877376	0.935977		8.26956	-0.0685879	-1.04869	0.864862	0.993691
ulaE		434049..434921	11.5683	0.209217	1.15606	0.727403	0.9999		9.74133	-0.0215715	-1.01506	0.969851	0.99997		9.74133	-0.145388	-1.10603	0.794997	0.999997		12.4832	0.133196	1.09672	0.724531	0.902561		9.74133	-0.269536	-1.20542	0.532313	0.989854		9.74133	-0.23201	-1.17447	0.570802	0.991074		13.6779	0.165691	1.1217	0.644956	0.786314		10.7104	0.00250462	1.00174	0.995506	0.997777
LOCUS_06080		434921..435256	12.9324	0.156358	1.11447	0.779955	0.9999		11.4477	-0.0993154	-1.07127	0.837268	0.99997		11.4477	-0.235241	-1.1771	0.623504	0.999997		15.6819	0.226996	1.1704	0.543476	0.814507		12.3365	-0.00767809	-1.00534	0.983761	0.997059		11.4477	-0.211694	-1.15805	0.580752	0.991074		19.441	0.438799	1.35548	0.262089	0.462087		11.4477	-0.18133	-1.13393	0.661024	0.965182
LOCUS_06090		435322..435474	10.0773	0.486333	1.40088	0.48271	0.9999		9.28238	0.398864	1.31847	0.54223	0.99997		8.55931	0.270199	1.20597	0.687208	0.999997		16.1383	0.967099	1.95491	0.0618775	0.349968		11.6845	0.590913	1.5062	0.274059	0.989854		12.697	0.702207	1.62699	0.226882	0.991074		16.3255	0.888278	1.85097	0.0602885	0.185651		8.996	0.22919	1.17218	0.703889	0.966083
LOCUS_06100		435456..435605	9.70751	-0.122887	-1.08891	0.856175	0.9999		10.8246	0.145567	1.10617	0.813786	0.99997		9.70751	-0.225163	-1.16891	0.73756	0.999997		21.3453	0.899341	1.86521	0.0511055	0.318483		12.1847	0.209449	1.15625	0.684934	0.990545		13.8467	0.352919	1.27714	0.497346	0.991074		19.9662	0.710212	1.63604	0.115219	0.27976		14.8418	0.472904	1.3879	0.345136	0.937303
LOCUS_06110		complement(435590..436006)	4.3579	0.388805	1.30931	0.639466	0.9999		3.21502	-0.028141	-1.0197	0.969979	0.99997		3.21502	-0.0415995	-1.02925	0.958741	0.999997		7.57164	1.07313	2.10399	0.0496382	0.312998		5.65122	0.768989	1.70407	0.165243	0.959798		5.96044	0.805235	1.74743	0.15208	0.991074		8.7822	1.18742	2.27746	0.0186365	0.0843333		5.62855	0.741078	1.67142	0.215532	0.887421
rpsF		436332..436727	11382.5	-0.0583734	-1.04129	0.892782	0.9999		11382.5	-0.0488213	-1.03442	0.89761	0.99997		11397.4	0.00156995	1.00109	0.99743	0.999997		11382.5	-0.471049	-1.38612	0.111936	0.445875		11382.5	-0.289389	-1.22212	0.359967	0.989854		11382.5	-0.333671	-1.26022	0.477788	0.991074		11382.5	-0.674074	-1.59557	0.210599	0.406085		11382.5	-0.288616	-1.22147	0.313328	0.927219
rpsR		437053..437280	10145.6	-0.0138927	-1.00968	0.975298	0.9999		10166.4	-0.00844931	-1.00587	0.983173	0.99997		10479.5	0.0499915	1.03526	0.918412	0.999997		10113.5	-0.395101	-1.31503	0.20138	0.565423		10113.5	-0.263516	-1.2004	0.410719	0.989854		10113.5	-0.271902	-1.2074	0.586206	0.991074		10113.5	-0.580265	-1.49512	0.245579	0.445466		10113.5	-0.248963	-1.18835	0.393509	0.948039
rplI		437322..437771	8787.13	-0.0389358	-1.02736	0.928685	0.9999		8944.69	0.00340517	1.00236	0.992872	0.99997		9077.7	0.0447418	1.0315	0.928277	0.999997		8787.13	-0.387157	-1.30781	0.186175	0.546776		8787.13	-0.243243	-1.18365	0.449767	0.989854		8787.13	-0.31192	-1.24136	0.500534	0.991074		8787.13	-0.569723	-1.48424	0.282769	0.483338		8787.13	-0.252554	-1.19131	0.373407	0.945774
LOCUS_06150		438210..438521	32.3034	-0.156784	-1.1148	0.785389	0.9999		32.3034	-0.127158	-1.09214	0.802682	0.99997		32.3034	-0.536981	-1.45093	0.341314	0.999997		32.724	-0.213146	-1.15921	0.583188	0.837293		32.3034	-0.494586	-1.40892	0.238177	0.989854		32.3034	-0.412049	-1.33057	0.360446	0.991074		39.8749	-0.0224787	-1.0157	0.949683	0.975202		32.3034	-0.304409	-1.23491	0.483532	0.955457
LOCUS_06160		438660..439166	29.2256	-0.118235	-1.08541	0.819819	0.9999		29.2256	-0.27882	-1.2132	0.574542	0.99997		29.2256	-0.44274	-1.35918	0.380548	0.999997		32.602	-0.069601	-1.04943	0.843194	0.949464		29.2256	-0.328792	-1.25596	0.400912	0.989854		29.2256	-0.274982	-1.20998	0.481404	0.991074		39.1473	0.0957036	1.06859	0.803031	0.894167		29.2256	-0.20107	-1.14955	0.624004	0.964103
LOCUS_06170		439312..439977	11.5059	-0.454213	-1.37004	0.482833	0.9999		11.5059	-0.385744	-1.30653	0.515734	0.99997		11.5059	-0.463341	-1.37873	0.457277	0.999997		15.1439	0.186434	1.13795	0.649247	0.869609		13.483	0.128594	1.09323	0.761644	0.990545		12.8231	0.0183629	1.01281	0.965164	0.996937		18.1862	0.357544	1.28124	0.351186	0.549769		13.4315	0.107359	1.07725	0.81604	0.986744
LOCUS_06180		complement(440065..440259)	3.12989	-1.00513	-2.00712	0.34323	0.9999		3.75766	0.309666	1.23942	0.750874	ND		3.12989	-1.22709	-2.34094	0.254287	0.999997		6.44302	0.934002	1.91057	0.221024	0.589891		4.79566	0.638295	1.55649	0.413792	0.989854		6.15502	0.940602	1.91933	0.210249	0.991074		7.68931	1.08649	2.12357	0.160344	0.345116		4.56639	0.52717	1.4411	0.488841	0.955457
LOCUS_06190		complement(440268..440543)	2.35577	-0.827619	-1.77475	0.383316	0.9999		2.35577	-0.389034	-1.30952	0.657141	ND		2.35577	-0.800714	-1.74196	0.395696	0.999997		4.55017	0.748211	1.67971	0.246243	0.614601		3.82559	0.619261	1.53609	0.353559	0.989854		3.91487	0.625749	1.54301	0.337597	0.991074		6.63713	1.20763	2.30958	0.0681904	0.200995		3.66697	0.558244	1.47248	0.411275	0.948039
LOCUS_06200		complement(440623..440940)	2.67356	0.123442	1.08933	0.869571	0.9999		2.4233	-0.659482	-1.57951	0.399515	ND		2.4233	-0.839632	-1.78959	0.352935	0.999997		5.34826	0.911076	1.88045	0.0974567	0.426636		3.06726	0.223968	1.16794	0.706596	0.990545		3.91954	0.534821	1.44876	0.309179	0.991074		11.6454	1.92925	3.80856	6.50892e-05	0.00101113		2.67277	0.0085791	1.00596	0.987959	0.997777
LOCUS_06210		complement(440880..441308)	0.944702	0.298797	1.23012	0.711187	0.9999		1.13707	0.564925	1.47931	0.469619	ND		0.95282	0.324602	1.25232	0.701867	0.999997		2.73665	1.6024	3.03649	0.015334	0.168591		1.42278	0.777793	1.71451	0.308747	0.989854		1.3487	0.66992	1.59098	0.364242	0.991074		5.53419	2.50669	5.68315	0.000479271	0.00532422		2.16933	1.35822	2.56369	0.054197	0.625629
LOCUS_06220		complement(441454..441888)	0.933474	-0.514604	-1.4286	0.574934	0.9999		0.934751	-0.00497331	-1.00345	0.995223	ND		0.939677	0.0101549	1.00706	0.990354	0.999997		2.23486	1.01934	2.02699	0.115792	0.452777		0.933474	-0.109509	-1.07886	0.88833	0.990545		0.933474	-0.431362	-1.34851	0.589081	ND		3.54134	1.58045	2.99063	0.0133937	0.0669949		1.67425	0.715738	1.64232	0.343437	0.937303
LOCUS_06230		complement(442076..442819)	2.07097	-0.143483	-1.10457	0.835809	0.9999		2.07097	-0.359498	-1.28298	0.606673	0.99997		2.07097	-0.165445	-1.12151	0.809352	0.999997		3.70151	0.61262	1.52903	0.16118	0.51849		3.16671	0.497876	1.41213	0.285624	0.989854		2.22715	-0.043496	-1.03061	0.93258	0.996072		4.41852	0.767538	1.70236	0.0649622	0.195706		2.99213	0.396762	1.31655	0.409332	0.948039
LOCUS_06240		complement(442816..443499)	2.60785	0.121696	1.08801	0.84635	0.9999		2.84959	0.256599	1.19466	0.639849	0.99997		2.45112	0.0357334	1.02508	0.954881	0.999997		3.3734	0.284789	1.21823	0.501531	0.79358		3.02734	0.238785	1.18	0.612436	0.990545		3.03503	0.202671	1.15083	0.662167	0.991074		4.98939	0.747001	1.6783	0.0582436	0.1814		3.31399	0.348517	1.27325	0.454136	0.955457
LOCUS_06250		complement(443496..444530)	3.1009	0.201884	1.1502	0.715641	0.9999		2.98202	0.155118	1.11351	0.775066	0.99997		2.6617	-0.119971	-1.08671	0.835376	0.999997		4.53781	0.545023	1.45904	0.170007	0.527219		3.72821	0.371446	1.29365	0.339897	0.989854		2.96654	0.00438851	1.00305	0.991231	0.998625		4.9436	0.568919	1.48341	0.126905	0.29771		4.92719	0.7532	1.68553	0.0556575	0.631996
LOCUS_06260		complement(444580..445035)	1.50925	0.260853	1.19819	0.721807	0.9999		1.24288	-0.109915	-1.07916	0.885713	ND		2.06655	0.718938	1.64597	0.318353	0.999997		1.95369	0.419312	1.33729	0.478496	0.780919		1.4239	0.0795095	1.05666	0.899944	0.990545		1.24288	-0.336433	-1.26263	0.61405	0.991074		4.01341	1.35033	2.5497	0.0165294	0.0767058		3.81663	1.46722	2.76488	0.0122818	0.295514
LOCUS_06270		complement(445045..445728)	0.946352	-1.94919	-3.86159	0.0308606	0.9999		1.01014	0.0806526	1.0575	0.911015	ND		1.37633	0.528649	1.44258	0.451791	0.999997		1.06479	-0.0563144	-1.03981	0.926342	0.975575		1.48445	0.525817	1.43975	0.381051	0.989854		0.946352	-0.20995	-1.15665	0.732697	0.991074		2.49295	1.05942	2.0841	0.0557757	0.177032		2.01208	0.941007	1.91987	0.0853783	0.728498
LOCUS_06280		complement(445830..446486)	1.10681	0.025612	1.01791	0.975492	0.9999		1.05031	-0.491583	-1.40599	0.535125	ND		1.05031	-0.0731031	-1.05198	0.924601	0.999997		2.15769	0.808217	1.75105	0.15249	0.505695		1.48541	0.390584	1.31092	0.542333	0.989854		1.05031	-0.393173	-1.31328	0.550337	0.991074		3.03921	1.20028	2.29784	0.0413237	0.146289		1.29385	0.167035	1.12275	0.781582	0.981364
LOCUS_06290		complement(446483..446671)	1.28732	1.45987	2.75084	0.217238	0.9999		0.430567	-0.00589389	-1.00409	0.996845	ND		1.95291	2.12322	4.35666	0.0947924	0.999997		1.28165	1.28551	2.43769	0.350207	0.69449		0.64562	0.419603	1.33756	0.74851	ND		0.433379	-0.122381	-1.08853	0.93064	ND		1.97962	1.75336	3.37143	0.11763	0.28352		0.641968	0.407061	1.32598	0.780001	ND
LOCUS_06300		complement(446681..446968)	3.93211	0.645967	1.56479	0.385978	0.9999		2.39173	-0.385797	-1.30658	0.599931	ND		2.4133	0.0116199	1.00809	0.98777	0.999997		4.5017	0.679474	1.60156	0.212686	0.580538		3.52739	0.440174	1.35677	0.447665	0.989854		3.88306	0.54185	1.45584	0.33676	0.991074		5.63106	0.901951	1.86859	0.0993846	0.254813		3.09246	0.232935	1.17522	0.683959	0.965584
LOCUS_06310		complement(446987..447472)	1.66358	0.0261004	1.01826	0.974571	0.9999		1.58646	-0.162989	-1.1196	0.816173	ND		1.58646	-0.145881	-1.10641	0.841031	0.999997		1.91616	0.0494991	1.03491	0.936018	0.979348		1.92256	0.163321	1.11986	0.78777	0.990545		1.70689	-0.0442307	-1.03113	0.942889	0.996072		2.91042	0.547569	1.46162	0.304373	0.50667		1.58646	-0.133848	-1.09722	0.82151	0.987567
LOCUS_06320		447670..447951	41.9501	-0.261036	-1.19834	0.590298	0.9999		41.9501	-0.0746535	-1.05311	0.883338	0.99997		41.9501	-0.192761	-1.14295	0.680839	0.999997		41.9501	-0.435169	-1.35207	0.281963	0.642853		41.9501	-0.210708	-1.15726	0.58612	0.990494		41.9501	-0.278974	-1.21333	0.49665	0.991074		41.9501	-0.828486	-1.77582	0.0275229	0.110366		41.9501	-0.328731	-1.25591	0.418332	0.948039
LOCUS_06330		448029..448262	35.9737	-0.0922785	-1.06605	0.879009	0.9999		37.8226	0.0579807	1.04101	0.918579	0.99997		35.9737	-0.199529	-1.14832	0.726867	0.999997		35.9737	-0.252215	-1.19103	0.559867	0.823852		42.8791	0.125273	1.09071	0.768902	0.990545		40.0593	-0.00867289	-1.00603	0.984258	0.997314		36.8226	-0.307208	-1.23731	0.460033	0.646924		39.6119	-0.00612085	-1.00425	0.988905	0.997777
LOCUS_06340		complement(448310..448777)	88.3812	-0.204933	-1.15263	0.642812	0.9999		88.3812	-0.018422	-1.01285	0.96695	0.99997		88.3812	-0.119914	-1.08667	0.776331	0.999997		88.3812	-0.387494	-1.30812	0.275568	0.635308		88.3812	-0.298277	-1.22967	0.323152	0.989854		88.3812	-0.207368	-1.15458	0.546851	0.991074		88.3812	-0.470464	-1.38556	0.0896043	0.238456		88.3812	-0.213996	-1.1599	0.48022	0.955457
LOCUS_06350		449166..449456	347.085	0.131007	1.09506	0.771165	0.9999		337.991	0.0808155	1.05762	0.848744	0.99997		344.941	0.124965	1.09048	0.765711	0.999997		316.647	-0.418365	-1.33641	0.288615	0.647384		316.647	-0.298281	-1.22968	0.309602	0.989854		316.647	-0.307389	-1.23747	0.386163	0.991074		316.647	-0.685446	-1.6082	0.0515067	0.167446		316.647	-0.265761	-1.20227	0.353946	0.937916
LOCUS_06360		449453..449785	479.815	0.0634231	1.04494	0.893393	0.9999		466.675	0.0128398	1.00894	0.97773	0.99997		458.004	-0.00676482	-1.0047	0.988413	0.999997		458.004	-0.50423	-1.41837	0.157119	0.511821		458.004	-0.388731	-1.30924	0.277434	0.989854		458.004	-0.269437	-1.20534	0.462772	0.991074		458.004	-0.6505	-1.56971	0.078605	0.218942		458.004	-0.419838	-1.33778	0.242002	0.900717
LOCUS_06370		450093..450431	70.93	0.0326974	1.02292	0.950207	0.9999		72.1011	0.0930066	1.06659	0.851384	0.99997		73.1129	0.116403	1.08403	0.81762	0.999997		90.4323	0.247723	1.18733	0.547231	0.815495		82.0775	0.219663	1.16446	0.586744	0.990494		105.657	0.547569	1.46162	0.175686	0.991074		107.998	0.405589	1.32463	0.31019	0.510896		98.9802	0.4696	1.38473	0.201327	0.876047
cycA		450320..451504	113.594	0.179919	1.13282	0.742833	0.9999		99.7074	0.0373701	1.02624	0.945019	0.99997		98.9624	0.0161328	1.01125	0.975664	0.999997		150.508	0.466027	1.3813	0.261316	0.627124		130.876	0.378958	1.3004	0.364724	0.989854		164.292	0.669576	1.59061	0.111741	0.991074		185.438	0.668993	1.58996	0.105	0.26416		149.678	0.550178	1.46427	0.174789	0.858414
ytfE		complement(451549..452211)	25.6065	0.276784	1.21149	0.672232	0.9999		21.6047	0.0840388	1.05998	0.890969	0.99997		23.3662	0.181187	1.13382	0.767342	0.999997		37.6182	0.725874	1.6539	0.0855402	0.403621		33.1244	0.651352	1.57064	0.122681	0.930393		39.7012	0.880554	1.84108	0.0161343	0.617699		53.55	1.13888	2.2021	0.0111766	0.0583886		34.8559	0.70771	1.63321	0.0828052	0.721803
LOCUS_06400		complement(452417..452920)	6.1916	0.811902	1.75552	0.163267	0.9999		3.55135	0.0238433	1.01666	0.969507	0.99997		5.59899	0.680338	1.60252	0.25856	0.999997		7.39036	0.871791	1.82993	0.0362281	0.270824		5.31699	0.513603	1.42761	0.262347	0.989854		6.56711	0.780338	1.71753	0.0679819	0.991074		13.7099	1.67121	3.18482	8.01439e-05	0.00119171		7.869	1.06045	2.08559	0.0249242	0.433294
LOCUS_06410		complement(452896..453282)	6.58533	0.125103	1.09059	0.846668	0.9999		5.7613	-0.391433	-1.3117	0.482441	0.99997		6.13481	0.0892961	1.06385	0.873719	0.999997		9.84237	0.548096	1.46215	0.169275	0.526305		5.7613	-0.135186	-1.09823	0.75098	0.990545		8.65293	0.44166	1.35817	0.303153	0.991074		14.4165	1.0096	2.01335	0.0148581	0.0716019		8.0532	0.349901	1.27447	0.413556	0.948039
LOCUS_06420		complement(453386..453880)	7.10299	-0.182326	-1.13471	0.756119	0.9999		7.10299	-0.206271	-1.1537	0.705833	0.99997		7.10299	-0.662036	-1.58231	0.291278	0.999997		7.10299	-0.471428	-1.38648	0.30533	0.662811		7.10299	-0.482674	-1.39733	0.302095	0.989854		7.10299	-0.615627	-1.53222	0.190392	0.991074		7.81665	-0.240705	-1.18157	0.56699	0.729877		7.10299	-0.65178	-1.57111	0.190924	0.862732
LOCUS_06430		454247..454444	1.6361	0.637939	1.5561	0.503914	0.9999		1.64184	0.646862	1.56576	0.4792	ND		1.65439	0.664056	1.58453	0.467423	0.999997		2.86549	1.21727	2.32506	0.115932	0.452822		1.02668	-0.110029	-1.07925	0.907744	ND		1.88798	0.698341	1.62264	0.417466	ND		1.47264	0.180551	1.13332	0.8381	0.916788		2.04387	0.830887	1.77878	0.300827	0.922626
LOCUS_06440		454432..454716	13.2395	0.148779	1.10863	0.770865	0.9999		11.799	-0.209378	-1.15619	0.677598	0.99997		11.799	-0.172685	-1.12715	0.739258	0.999997		13.6454	-0.0135913	-1.00947	0.971555	0.989823		11.966	-0.0923455	-1.0661	0.816122	0.990545		15.552	0.24813	1.18767	0.525734	0.991074		14.1626	-0.059394	-1.04203	0.863698	0.931064		11.799	-0.420709	-1.33859	0.329612	0.935939
LOCUS_06450		complement(455003..455701)	56.4216	0.202013	1.1503	0.668448	0.9999		49.4269	0.0215646	1.01506	0.964656	0.99997		48.4383	-0.101362	-1.07279	0.830531	0.999997		48.4383	-0.271632	-1.20717	0.495597	0.790771		48.4383	-0.400798	-1.32024	0.286463	0.989854		48.4383	-0.484735	-1.39933	0.208131	0.991074		49.2942	-0.336258	-1.26248	0.325091	0.526302		48.4383	-0.292429	-1.2247	0.462862	0.955457
LOCUS_06460		complement(455773..456234)	41.3216	0.218153	1.16324	0.692131	0.9999		34.9259	-0.0621644	-1.04403	0.905158	0.99997		34.9259	-0.118507	-1.08561	0.82718	0.999997		34.9259	-0.391338	-1.31161	0.325405	0.675567		34.9259	-0.441417	-1.35794	0.277017	0.989854		34.9259	-0.382966	-1.30402	0.346572	0.991074		37.0149	-0.284561	-1.21804	0.47506	0.659441		34.9259	-0.366421	-1.28915	0.402809	0.948039
LOCUS_06470		complement(456270..456527)	45.2979	0.161131	1.11816	0.765179	0.9999		45.7215	0.185906	1.13753	0.748	0.99997		39.8019	-0.0986228	-1.07075	0.858021	0.999997		39.8019	-0.505003	-1.41913	0.236918	0.604964		39.8019	-0.662827	-1.58318	0.149577	0.949704		39.8019	-0.424628	-1.34223	0.379804	0.991074		39.8019	-0.422168	-1.33994	0.307993	0.509139		39.8019	-0.451463	-1.36743	0.345617	0.937303
LOCUS_06480		complement(456509..456784)	42.9206	0.223257	1.16737	0.659576	0.9999		37.6192	0.035681	1.02504	0.947067	0.99997		36.3455	-0.126172	-1.09139	0.815157	0.999997		37.8504	-0.202542	-1.15072	0.63389	0.861006		36.3455	-0.312668	-1.242	0.482008	0.989854		36.3455	-0.577731	-1.4925	0.214229	0.991074		36.3455	-0.444426	-1.36077	0.269584	0.469369		36.3455	-0.366904	-1.28958	0.423525	0.950116
cysQ		456974..457714	70.2494	0.0850526	1.06073	0.830688	0.9999		67.864	0.0511106	1.03606	0.90853	0.99997		67.3485	0.0409379	1.02878	0.92472	0.999997		77.0753	0.010858	1.00755	0.973713	0.990417		68.2856	-0.0636109	-1.04508	0.856227	0.990545		68.2853	-0.092413	-1.06615	0.800614	0.99192		86.632	0.0800573	1.05706	0.820055	0.905117		72.1035	0.00478226	1.00332	0.987705	0.997777
LOCUS_06500		complement(458019..458258)	52.8722	-0.0631401	-1.04474	0.899924	0.9999		52.8722	-0.0170604	-1.0119	0.973529	0.99997		59.4942	0.167374	1.12301	0.754658	0.999997		65.6678	0.110686	1.07974	0.760202	0.919564		61.6008	0.124013	1.08976	0.753481	0.990545		66.5214	0.197132	1.14642	0.614341	0.991074		65.0323	-0.00286866	-1.00199	0.99421	0.996035		67.4582	0.235627	1.17742	0.571559	0.960549
ytfK		458581..458787	123.762	0.386475	1.3072	0.407444	0.9999		107.138	0.189726	1.14055	0.67868	0.99997		143.365	0.620289	1.53718	0.163482	0.999997		145.941	0.42486	1.34244	0.255237	0.62368		125.839	0.324386	1.25213	0.377238	0.989854		122.112	0.238804	1.18001	0.519246	0.991074		139.346	0.263315	1.20023	0.494419	0.676242		124.361	0.285021	1.21843	0.46488	0.955457
ytfL		complement(458848..460191)	161.345	0.0111221	1.00774	0.979459	0.9999		165.118	0.0520636	1.03675	0.901846	0.99997		162.83	0.0254389	1.01779	0.955222	0.999997		192.601	0.0870914	1.06223	0.805337	0.937066		187.458	0.157986	1.11573	0.624455	0.990545		216.839	0.33173	1.25852	0.406316	0.991074		190.707	-0.0264109	-1.01848	0.940314	0.970628		200.65	0.235833	1.17759	0.465172	0.955457
msrA		complement(460514..461086)	29.6515	0.288983	1.22178	0.571223	0.9999		23.955	-0.0454403	-1.032	0.92776	0.99997		27.3674	0.190387	1.14107	0.719477	0.999997		26.502	-0.0796969	-1.0568	0.821626	0.943373		24.2487	-0.0987876	-1.07087	0.799792	0.990545		30.0266	0.172353	1.12689	0.6279	0.991074		31.2278	0.0573995	1.04059	0.877	0.935977		30.5148	0.213597	1.15958	0.613855	0.962755
LOCUS_06540		461299..461802	63.5802	-0.225624	-1.16928	0.608073	0.9999		63.5802	-0.194642	-1.14444	0.705485	0.99997		63.5802	-0.125659	-1.09101	0.785911	0.999997		63.5802	-0.404193	-1.32335	0.232427	0.60022		63.5802	-0.304881	-1.23532	0.361278	0.989854		64.4955	-0.128953	-1.0935	0.697538	0.991074		63.5802	-0.43011	-1.34734	0.237673	0.436983		63.5802	-0.177191	-1.13068	0.659006	0.965182
LOCUS_06550		461814..463088	68.4675	-0.125712	-1.09105	0.758784	0.9999		68.4675	-0.122057	-1.08829	0.782961	0.99997		68.4675	-0.190748	-1.14136	0.64865	0.999997		68.4675	-0.384797	-1.30568	0.348684	0.693298		68.4675	-0.290136	-1.22276	0.33637	0.989854		69.5093	-0.141903	-1.10336	0.675556	0.991074		68.4675	-0.499792	-1.41401	0.141419	0.319217		68.4675	-0.301471	-1.2324	0.308972	0.926299
LOCUS_06560		463093..463488	56.0429	-0.211336	-1.15776	0.689701	0.9999		56.0429	-0.121894	-1.08816	0.773018	0.99997		56.0429	-0.0832742	-1.05942	0.870879	0.999997		56.0429	-0.319364	-1.24778	0.3918	0.725214		56.0429	-0.231443	-1.17401	0.532346	0.989854		57.2444	-0.121799	-1.08809	0.741895	0.991074		56.0429	-0.327647	-1.25497	0.238605	0.437852		56.0429	-0.188858	-1.13986	0.611508	0.962755
LOCUS_06570		463410..464021	52.9907	-0.175554	-1.1294	0.680202	0.9999		52.9907	-0.168476	-1.12387	0.746469	0.99997		52.9907	-0.218914	-1.16386	0.646637	0.999997		52.9907	-0.430778	-1.34796	0.214439	0.58358		52.9907	-0.180788	-1.1335	0.606174	0.990545		52.9907	-0.199776	-1.14852	0.551324	0.991074		53.5645	-0.315104	-1.2441	0.330762	0.53077		52.9907	-0.181364	-1.13396	0.653389	0.965182
LOCUS_06580		464030..464773	61.8367	-0.0516428	-1.03644	0.90655	0.9999		61.8367	-0.0215027	-1.01502	0.962335	0.99997		61.8367	-0.0624745	-1.04426	0.882271	0.999997		65.271	-0.147242	-1.10745	0.665596	0.876146		65.642	-0.0301612	-1.02113	0.930718	0.993073		65.4764	-0.0709684	-1.05042	0.857286	0.99192		71.2436	-0.120159	-1.08685	0.736843	0.85264		67.5183	-0.0090777	-1.00631	0.977296	0.997777
LOCUS_06590		464770..465267	65.4727	-0.132974	-1.09655	0.761162	0.9999		68.1608	0.0503631	1.03553	0.913186	0.99997		65.6808	0.00383784	1.00266	0.993116	0.999997		71.0741	-0.105352	-1.07576	0.775875	0.926279		68.2151	-0.0549893	-1.03885	0.861688	0.990545		74.5398	0.03556	1.02495	0.900277	0.991929		79.6018	-0.0411192	-1.02891	0.885479	0.940483		70.1419	-0.0340388	-1.02387	0.926676	0.994151
LOCUS_06600		465222..465425	26.9054	-0.0191306	-1.01335	0.97265	0.9999		26.7766	-0.134134	-1.09743	0.818765	0.99997		26.7766	-0.0954536	-1.0684	0.859943	0.999997		26.7766	-0.243936	-1.18422	0.533762	0.80881		33.6729	0.19569	1.14527	0.634234	0.990545		26.7766	-0.308078	-1.23806	0.484659	0.991074		33.6596	-0.00576988	-1.00401	0.98728	0.99326		30.9516	0.0654637	1.04642	0.869145	0.993691
LOCUS_06610		465416..466642	76.1308	-0.0776606	-1.05531	0.836848	0.9999		76.1308	-0.0137307	-1.00956	0.973459	0.99997		76.1308	-0.0844721	-1.0603	0.827356	0.999997		81.2355	-0.128086	-1.09284	0.699162	0.89418		79.591	-0.0494227	-1.03485	0.847609	0.990545		82.5621	-0.0330989	-1.02321	0.904612	0.991929		90.5437	-0.0708456	-1.05033	0.786513	0.883855		82.5353	-0.0147548	-1.01028	0.954566	0.995228
LOCUS_06620		466612..466857	120.305	-0.023516	-1.01643	0.958738	0.9999		120.305	0.00223958	1.00155	0.996433	0.99997		120.305	-0.0377065	-1.02648	0.933913	0.999997		150.172	0.121795	1.08809	0.752574	0.917182		140.558	0.136816	1.09948	0.702365	0.990545		141.088	0.104155	1.07486	0.762374	0.991074		157.274	0.0889904	1.06363	0.783644	0.88274		137.225	0.0824496	1.05881	0.841694	0.99292
ytfP		466860..467201	138.98	0.0309886	1.02171	0.941856	0.9999		140.228	0.0637979	1.04521	0.88326	0.99997		134.496	-0.074764	-1.05319	0.860545	0.999997		190.937	0.295877	1.22763	0.32949	0.677246		168.824	0.226893	1.17031	0.467495	0.989854		170.429	0.201597	1.14997	0.550795	0.991074		195.108	0.228033	1.17124	0.524338	0.698875		171.263	0.231864	1.17435	0.476339	0.955457
chpS		467411..467662	17.5225	-0.263926	-1.20074	0.659238	0.9999		17.5225	-0.380125	-1.30145	0.464849	0.99997		17.5225	-0.125524	-1.0909	0.816081	0.999997		18.4772	-0.146114	-1.10658	0.679679	0.884775		17.5225	-0.17695	-1.13049	0.645539	0.990545		17.5225	-0.198207	-1.14727	0.653283	0.991074		23.9426	0.127227	1.09219	0.746211	0.857638		17.6668	-0.120997	-1.08749	0.755745	0.971441
LOCUS_06650		467656..468006	15.5652	0.0636334	1.04509	0.91903	0.9999		14.3261	-0.247549	-1.18719	0.692779	0.99997		15.7375	0.141694	1.1032	0.795305	0.999997		20.183	0.291641	1.22403	0.496886	0.791064		19.211	0.321471	1.2496	0.427642	0.989854		20.2054	0.357093	1.28084	0.387782	0.991074		25.243	0.512431	1.42645	0.199182	0.392863		18.104	0.218518	1.16354	0.579341	0.960549
ppa		complement(468084..468614)	1269.83	-0.0938871	-1.06724	0.858027	0.9999		1269.83	-0.078695	-1.05606	0.869813	0.99997		1269.83	-0.00179699	-1.00125	0.997402	0.999997		1269.83	-0.903926	-1.87115	0.028615	0.237632		1269.83	-0.695324	-1.61925	0.0907287	0.886988		1269.83	-0.772573	-1.70831	0.0874806	0.991074		1269.83	-1.13274	-2.19275	0.0148532	0.0716019		1269.83	-0.840774	-1.79101	0.0322987	0.495268
ytfQ		468923..469801	3.86909	-0.103597	-1.07445	0.855811	0.9999		3.86909	-0.0580136	-1.04103	0.902448	0.99997		3.86909	-0.113602	-1.08193	0.820035	0.999997		4.88294	0.110738	1.07978	0.775368	0.926174		4.90176	0.22491	1.1687	0.568955	0.990494		4.10943	-0.067339	-1.04778	0.85995	0.99192		8.52318	0.812828	1.75665	0.0373345	0.136661		5.06552	0.253232	1.19187	0.524118	0.955982
LOCUS_06680		470017..470517	4.21522	0.101443	1.07285	0.859205	0.9999		3.88431	-0.162651	-1.11934	0.7795	0.99997		4.73747	0.284222	1.21775	0.59671	0.999997		7.76126	0.773627	1.70956	0.0442655	0.298527		7.2931	0.797829	1.73848	0.100822	0.917197		6.79289	0.65287	1.57229	0.110736	0.991074		10.6287	1.12704	2.1841	0.00222834	0.017815		5.25177	0.301822	1.2327	0.505634	0.955457
LOCUS_06690		470430..470843	3.32962	-0.453707	-1.36955	0.475872	0.9999		3.63242	0.116201	1.08388	0.856671	0.99997		3.32962	-0.895214	-1.85989	0.144329	0.999997		5.47658	0.492805	1.40718	0.281242	0.641866		3.5356	-0.0269705	-1.01887	0.958887	0.995544		3.79952	0.0421263	1.02963	0.936873	0.996072		7.73638	0.889865	1.853	0.0446228	0.153627		4.98565	0.447534	1.36371	0.376666	0.947972
LOCUS_06700		470861..471268	3.58638	0.826273	1.7731	0.188746	0.9999		1.98544	-0.414134	-1.3325	0.538018	ND		1.98544	-0.0608134	-1.04305	0.92955	0.999997		4.16453	0.83241	1.78066	0.146918	0.499311		2.68652	0.318565	1.24709	0.574614	0.990494		2.54022	0.20052	1.14911	0.721896	0.991074		5.61029	1.1639	2.24062	0.0192516	0.0859476		4.16728	0.9267	1.90092	0.105942	0.772319
LOCUS_06710		471244..471516	2.23809	0.339196	1.26505	0.66876	0.9999		1.9336	0.108606	1.07819	0.893612	ND		1.78549	-0.237368	-1.17884	0.771811	0.999997		4.15158	0.98251	1.9759	0.151962	0.505437		2.82727	0.542925	1.45692	0.408122	0.989854		2.58476	0.376307	1.29801	0.581521	0.991074		6.40366	1.50238	2.8331	0.0152652	0.0728043		2.52007	0.359887	1.28333	0.595204	0.960549
LOCUS_06720		471527..472186	2.27165	-0.465287	-1.38059	0.482114	0.9999		2.27165	-0.212966	-1.15907	0.739929	0.99997		2.27165	-0.0923342	-1.06609	0.891977	0.999997		5.58483	1.06952	2.09873	0.00901662	0.127098		2.64772	0.106239	1.07642	0.836964	0.990545		2.27165	-0.6225	-1.53954	0.255612	0.991074		8.57152	1.58715	3.00455	4.09486e-05	0.000687846		2.94455	0.248907	1.18831	0.652372	0.965182
LOCUS_06730		472204..472551	3.2699	0.783651	1.72148	0.250672	0.9999		2.33088	0.312517	1.24187	0.648784	ND		1.87989	0.0113305	1.00788	0.988398	0.999997		6.39923	1.5418	2.91157	0.00340137	0.066632		3.50261	0.786549	1.72494	0.172053	0.967354		3.69633	0.825308	1.77191	0.14411	0.991074		9.44524	2.0015	4.00417	3.27221e-05	0.000563277		5.11679	1.31051	2.48029	0.0280078	0.457603
LOCUS_06740		472538..472960	3.54158	0.0295125	1.02067	0.968324	0.9999		3.45603	-0.382978	-1.30403	0.569685	0.99997		3.45603	-0.199726	-1.14848	0.786724	0.999997		9.3884	1.26615	2.40519	0.00789773	0.119958		5.57168	0.624095	1.54124	0.234413	0.989854		4.30949	0.217483	1.1627	0.713851	0.991074		10.0378	1.26189	2.39809	0.0139172	0.0686252		7.17456	0.97365	1.9638	0.0785546	0.708588
LOCUS_06750		472995..473366	7.64315	-0.504852	-1.41898	0.467853	0.9999		7.64315	-0.617142	-1.53383	0.372348	0.99997		7.64315	-0.429889	-1.34713	0.560094	0.999997		10.0149	0.242463	1.18301	0.632409	0.860329		7.64315	-0.076672	-1.05458	0.893814	0.990545		9.92757	0.310637	1.24025	0.538797	0.991074		13.3134	0.554345	1.4685	0.252894	0.453192		8.15883	0.0385728	1.0271	0.943932	0.995228
LOCUS_06760		473348..473530	14.3869	-0.177779	-1.13114	0.741074	0.9999		14.3869	-0.440117	-1.35671	0.397602	0.99997		14.3869	-0.336358	-1.26256	0.536758	0.999997		16.1518	-0.0565712	-1.03999	0.877336	0.962362		16.2041	0.0572418	1.04047	0.898927	0.990545		18.1551	0.181289	1.1339	0.656423	0.991074		16.6115	-0.11668	-1.08424	0.796684	0.889696		20.3493	0.365271	1.28812	0.409376	0.948039
LOCUS_06770		complement(473563..474087)	236.911	-0.224909	-1.1687	0.667477	0.9999		236.911	-0.227379	-1.17071	0.654825	0.99997		236.911	-0.0469104	-1.03305	0.928727	0.999997		236.911	-0.901318	-1.86777	0.0255331	0.224221		236.911	-0.707579	-1.63306	0.0518504	0.741237		236.911	-0.751738	-1.68382	0.0305064	0.859848		236.911	-0.885615	-1.84755	0.0119454	0.0614808		236.911	-0.722652	-1.65021	0.0423654	0.561098
LOCUS_06780		complement(474341..474559)	185.623	-0.364599	-1.28752	0.480206	0.9999		185.623	-0.180049	-1.13292	0.707681	0.99997		185.623	-0.0781573	-1.05567	0.881246	0.999997		185.623	-0.93936	-1.91768	0.0394919	0.28321		185.623	-0.687365	-1.61034	0.106735	0.926784		185.623	-0.903655	-1.8708	0.0211255	0.711525		185.623	-1.18901	-2.27995	0.00554701	0.0354612		185.623	-0.687274	-1.61024	0.109851	0.780642
LOCUS_06790		474734..475138	239.41	-0.0439195	-1.03091	0.919377	0.9999		239.41	-0.0535771	-1.03784	0.899861	0.99997		239.41	-0.00469556	-1.00326	0.991262	0.999997		239.41	-0.611569	-1.52792	0.126647	0.470864		239.41	-0.449139	-1.36523	0.131281	0.934658		239.41	-0.353467	-1.27763	0.296591	0.991074		239.41	-0.790245	-1.72937	0.0223265	0.0957583		239.41	-0.444475	-1.36082	0.126837	0.827942
mpl		475027..476106	329.664	-0.0564959	-1.03994	0.905339	0.9999		329.664	-0.0235009	-1.01642	0.959007	0.99997		329.664	-0.0143206	-1.00998	0.977395	0.999997		329.664	-0.461466	-1.37694	0.146701	0.49902		329.664	-0.378241	-1.29976	0.26517	0.989854		329.664	-0.236331	-1.17799	0.492218	0.991074		329.664	-0.636724	-1.55479	0.0704335	0.204919		329.664	-0.374951	-1.2968	0.24544	0.90075
yjgA		complement(476257..476808)	285.132	-0.1389	-1.10107	0.756087	0.9999		285.132	-0.0741447	-1.05274	0.867303	0.99997		285.132	-0.035679	-1.02504	0.937081	0.999997		285.132	-0.287055	-1.22015	0.389962	0.723991		285.132	-0.246818	-1.18659	0.466192	0.989854		293.76	-0.117503	-1.08486	0.740461	0.991074		285.132	-0.39096	-1.31127	0.226583	0.425288		288.451	-0.124166	-1.08988	0.727679	0.968441
LOCUS_06820		477344..477691	82.7769	0.129239	1.09372	0.791669	0.9999		80.93	0.0942554	1.06751	0.830359	0.99997		84.6256	0.18428	1.13625	0.694288	0.999997		74.1501	-0.351135	-1.27556	0.379965	0.716773		76.2217	-0.126417	-1.09158	0.74649	0.990545		75.0102	-0.184478	-1.13641	0.645177	0.991074		74.1501	-0.385188	-1.30603	0.377361	0.575781		74.1501	-0.19846	-1.14747	0.630546	0.964103
LOCUS_06830		477679..478251	113.147	-0.0431481	-1.03036	0.930613	0.9999		113.147	-0.0772439	-1.055	0.879057	0.99997		113.147	-0.0476312	-1.03357	0.92065	0.999997		113.147	-0.39149	-1.31175	0.271145	0.6311		113.147	-0.258109	-1.19591	0.488723	0.989854		113.147	-0.173991	-1.12818	0.529376	0.991074		113.147	-0.565332	-1.47973	0.082887	0.226495		113.147	-0.209691	-1.15644	0.607702	0.962359
LOCUS_06840		478429..478668	135.633	-0.265044	-1.20167	0.599136	0.9999		135.633	-0.0580327	-1.04105	0.918688	0.99997		149.261	0.142514	1.10383	0.783254	0.999997		149.283	-0.0222746	-1.01556	0.960346	0.985928		168.518	0.266322	1.20274	0.496896	0.989854		164.141	0.198412	1.14743	0.588249	0.991074		135.633	-0.371528	-1.29372	0.384064	0.582043		168.116	0.241249	1.18202	0.56663	0.960549
LOCUS_06850		478665..478814	135.531	-0.392772	-1.31291	0.460603	0.9999		135.531	-0.227286	-1.17063	0.69588	0.99997		135.531	-0.107462	-1.07733	0.850047	0.999997		142.239	-0.100105	-1.07185	0.823143	0.943866		166.491	0.239289	1.18041	0.567049	0.990494		162.548	0.176376	1.13004	0.674825	0.991074		135.531	-0.754525	-1.68708	0.0817164	0.224581		153.78	0.103997	1.07475	0.810705	0.986137
nrdG		complement(478859..479323)	389.008	-0.468606	-1.38377	0.329986	0.9999		389.008	-0.210078	-1.15675	0.654124	0.99997		389.008	-0.249482	-1.18878	0.62094	0.999997		389.008	-0.2942	-1.2262	0.484041	0.783031		454.964	0.171192	1.12599	0.654158	0.990545		389.008	-0.0960636	-1.06885	0.821972	0.99192		389.008	-1.01076	-2.01497	0.0129584	0.0652017		389.008	-0.251772	-1.19067	0.52982	0.956492
LOCUS_06870		complement(479482..480540)	611.086	-0.477215	-1.39205	0.347544	0.9999		611.086	-0.221193	-1.1657	0.624808	0.99997		611.086	-0.288325	-1.22122	0.589911	0.999997		611.086	-0.5324	-1.44633	0.184301	0.54482		638.638	-0.00767078	-1.00533	0.984214	0.997059		611.086	-0.331537	-1.25835	0.476689	0.991074		611.086	-1.23997	-2.36194	0.00470222	0.0310892		611.086	-0.392974	-1.3131	0.327466	0.933853
LOCUS_06880		complement(480522..481619)	579.833	-0.599233	-1.51491	0.23951	0.9999		579.833	-0.292515	-1.22477	0.531503	0.99997		579.833	-0.455945	-1.37168	0.406791	0.999997		579.833	-0.6716	-1.59284	0.0928062	0.418806		579.833	-0.0898985	-1.0643	0.815763	0.990545		579.833	-0.478079	-1.39289	0.284421	0.991074		579.833	-1.46023	-2.75152	0.00084185	0.00819651		579.833	-0.534762	-1.4487	0.177225	0.859667
LOCUS_06890		complement(482009..483076)	138.556	0.726548	1.65468	0.150285	0.9999		108.42	0.436655	1.35346	0.438829	0.99997		80.4309	-0.910682	-1.87993	0.07494	0.999997		80.4309	-0.684185	-1.60679	0.173923	0.532148		80.4309	-1.085	-2.12138	0.0154008	0.387718		80.4309	-0.795176	-1.73529	0.04234	0.947433		80.4309	-1.9918	-3.97732	2.08696e-06	5.26423e-05		80.4309	-1.45563	-2.74276	0.00074787	0.0300877
LOCUS_06900	treC	complement(483058..483660)	123.884	0.649871	1.56903	0.213919	0.9999		91.8867	0.269213	1.20515	0.620215	0.99997		76.772	-0.994684	-1.99264	0.0368422	0.999997		76.772	-0.812312	-1.75602	0.101589	0.432359		76.772	-1.27752	-2.42422	0.000671795	0.0300096		76.772	-0.832869	-1.78122	0.0273361	0.837975		76.772	-2.09307	-4.26654	6.81193e-07	1.92828e-05		76.772	-1.56355	-2.9558	0.000396712	0.0169634
LOCUS_06910		complement(483709..484584)	148.818	0.798412	1.73919	0.124851	0.9999		95.6002	0.215926	1.16145	0.705468	0.99997		82.2482	-0.624068	-1.54122	0.27682	0.999997		82.2482	-0.607618	-1.52374	0.260981	0.627124		82.2482	-1.0718	-2.10206	0.0125791	0.333894		82.2482	-0.997432	-1.99644	0.0251333	0.78749		82.2482	-2.04035	-4.11345	2.62003e-06	6.39773e-05		82.2482	-1.35845	-2.56409	0.0011042	0.0428121
LOCUS_06920		complement(484545..484829)	126.384	0.651834	1.57116	0.254813	0.9999		91.8604	0.240913	1.18174	0.732051	0.99997		77.7885	-0.376076	-1.29781	0.540354	0.999997		77.7885	-1.00174	-2.00242	0.0814647	0.398713		77.7885	-1.01199	-2.01669	0.0421265	0.686949		77.7885	-1.3807	-2.60395	0.00813101	0.436987		77.7885	-2.54118	-5.82064	6.68948e-07	1.90775e-05		77.7885	-1.32543	-2.50607	0.0158711	0.334545
LOCUS_06930		complement(484826..485128)	119.641	0.508159	1.42223	0.367556	0.9999		87.1036	0.0970994	1.06962	0.885507	0.99997		80.755	-0.534956	-1.4489	0.42938	0.999997		80.755	-1.17853	-2.26346	0.0474444	0.309544		80.755	-1.13358	-2.19402	0.025807	0.527671		80.755	-1.48869	-2.80635	0.00621181	0.38802		80.755	-2.59529	-6.04309	2.84143e-07	8.97398e-06		80.755	-1.68335	-3.21172	0.00255696	0.086188
treR		complement(485247..486194)	55.8337	0.0302847	1.02121	0.940996	0.9999		55.7529	0.0328545	1.02303	0.938256	0.99997		62.5525	0.22335	1.16744	0.639044	0.999997		54.1126	-0.29042	-1.223	0.368826	0.710502		56.4895	-0.0624272	-1.04422	0.841751	0.990545		54.1126	-0.182291	-1.13468	0.618757	0.991074		54.1126	-0.413798	-1.33219	0.245059	0.444891		54.1126	-0.158705	-1.11628	0.613264	0.962755
LOCUS_06950		486570..487145	44.9066	-0.0753188	-1.05359	0.884561	0.9999		51.3265	0.157632	1.11545	0.759225	0.99997		49.4487	0.14255	1.10385	0.789157	0.999997		45.7193	-0.26265	-1.19968	0.551328	0.817925		44.9066	-0.333588	-1.26014	0.438633	0.989854		47.8726	-0.132862	-1.09647	0.756727	0.991074		63.8575	0.117791	1.08507	0.780263	0.881399		44.9066	-0.209563	-1.15634	0.634852	0.964239
LOCUS_06960		487142..488602	79.2716	-0.246841	-1.18661	0.629397	0.9999		84.588	0.0699194	1.04966	0.894232	0.99997		82.8251	0.0672666	1.04773	0.896526	0.999997		89.1242	-0.114693	-1.08274	0.761936	0.920056		79.2716	-0.220099	-1.16481	0.562806	0.990494		82.1033	-0.170196	-1.12521	0.625304	0.991074		112.01	0.113627	1.08194	0.782507	0.882128		81.8074	-0.150387	-1.10987	0.692119	0.965584
LOCUS_06970		488649..489263	129.037	-0.221675	-1.16609	0.587237	0.9999		133.543	0.0353626	1.02481	0.93259	0.99997		129.037	-0.0448747	-1.03159	0.917057	0.999997		183.138	0.256341	1.19445	0.453451	0.765705		159.923	0.16242	1.11916	0.574594	0.990494		156.414	0.0932397	1.06676	0.791792	0.99192		200.793	0.28789	1.22085	0.330524	0.53077		164.264	0.187233	1.13858	0.508966	0.955457
yjgF		complement(489469..489855)	787.886	0.137106	1.0997	0.79114	0.9999		747.696	0.0474057	1.0334	0.925125	0.99997		736.73	0.0381477	1.02679	0.942577	0.999997		718.094	-0.540117	-1.45409	0.143928	0.495021		718.094	-0.517023	-1.431	0.15507	0.952465		718.094	-0.519478	-1.43344	0.224682	0.991074		718.094	-0.786834	-1.72528	0.0364082	0.134105		718.094	-0.543184	-1.45718	0.126872	0.827942
pyrI		complement(489928..490389)	104.653	0.0714552	1.05078	0.888054	0.9999		101.138	-0.00523451	-1.00363	0.99187	0.99997		99.2265	-0.0538706	-1.03805	0.910759	0.999997		99.2265	-0.751899	-1.68401	0.0645144	0.355593		99.2265	-0.434502	-1.35144	0.287444	0.989854		99.2265	-0.567331	-1.48178	0.153986	0.991074		99.2265	-0.934202	-1.91083	0.0080464	0.0463441		99.2265	-0.574258	-1.48891	0.125366	0.826533
LOCUS_07000		complement(490402..491028)	96.7972	0.178906	1.13203	0.738667	0.9999		87.4239	-0.00206953	-1.00144	0.996777	0.99997		88.5109	0.0331068	1.02321	0.948311	0.999997		85.9913	-0.664838	-1.58539	0.0743097	0.38205		85.9913	-0.468748	-1.38391	0.225302	0.989854		85.9913	-0.397239	-1.31698	0.324706	0.991074		85.9913	-0.844503	-1.79565	0.0268001	0.108517		85.9913	-0.511996	-1.42602	0.149049	0.834482
LOCUS_07010		complement(491028..491336)	74.5418	0.158286	1.11596	0.786224	0.9999		67.0055	-0.112467	-1.08108	0.824781	0.99997		67.0055	-0.089129	-1.06373	0.863671	0.999997		67.0055	-0.8477	-1.79963	0.0340415	0.261647		67.0055	-0.79471	-1.73473	0.0515273	0.741237		67.0055	-0.521361	-1.43531	0.209377	0.991074		67.0055	-1.12476	-2.18066	0.00497184	0.0325062		67.0055	-0.5898	-1.50504	0.15017	0.835842
LOCUS_07020		complement(491751..491942)	12.2378	0.534355	1.44829	0.362534	0.9999		8.46937	0.0311073	1.0218	0.960003	0.99997		8.94965	0.118283	1.08544	0.846393	0.999997		8.85384	-0.116845	-1.08436	0.812654	0.940003		9.94938	0.158602	1.11621	0.752764	0.990545		13.1641	0.52478	1.43871	0.246779	0.991074		13.8706	0.427341	1.34475	0.301554	0.503666		12.4355	0.460043	1.37558	0.355478	0.937916
LOCUS_07030		complement(492276..492989)	16.345	0.323021	1.25095	0.552295	0.9999		14.4559	0.180753	1.13348	0.722604	0.99997		15.1319	0.258613	1.19633	0.621206	0.999997		15.7674	0.104327	1.07499	0.801716	0.935982		17.174	0.338116	1.26411	0.426237	0.989854		19.2127	0.47464	1.38957	0.270333	0.991074		16.788	0.0982441	1.07047	0.79714	0.889812		17.0618	0.308915	1.23878	0.478991	0.955457
LOCUS_07040		493395..493646	27.1693	-0.0407545	-1.02865	0.948828	0.9999		28.8312	0.0793881	1.05657	0.890535	0.99997		27.1693	-0.178936	-1.13205	0.771258	0.999997		27.1693	-0.443383	-1.35979	0.268165	0.629637		27.1693	-0.233763	-1.1759	0.54034	0.989854		28.3058	-0.0915097	-1.06548	0.813537	0.99192		27.394	-0.307264	-1.23736	0.419489	0.611745		30.3596	0.0289321	1.02026	0.946201	0.995228
LOCUS_07050		493791..494222	61.7992	0.131459	1.0954	0.7752	0.9999		58.4339	0.0410642	1.02887	0.92622	0.99997		56.3101	-0.183032	-1.13527	0.699004	0.999997		56.3101	-0.276437	-1.2112	0.452893	0.765705		56.3101	-0.240129	-1.1811	0.497624	0.989854		56.3101	-0.205701	-1.15325	0.610223	0.991074		56.3101	-0.453004	-1.36889	0.152489	0.334425		56.3101	-0.163426	-1.11994	0.695076	0.965584
LOCUS_07060		494601..494798	9.01585	0.977243	1.9687	0.133594	0.9999		5.73855	0.339689	1.26548	0.593231	0.99997		5.16465	0.194136	1.14404	0.750975	0.999997		7.56878	0.520058	1.43401	0.319642	0.673673		5.74305	0.234731	1.17669	0.668204	0.990545		8.14601	0.700945	1.62557	0.211102	0.991074		7.77473	0.459236	1.37481	0.370373	0.569226		7.56393	0.609044	1.52525	0.279557	0.920983
LOCUS_07070		494795..495001	8.41037	-0.351041	-1.27548	0.569179	0.9999		9.43114	0.127035	1.09205	0.832288	0.99997		8.41037	-0.709136	-1.63482	0.277375	0.999997		8.41037	-0.400328	-1.31981	0.452894	0.765705		8.83331	-0.044608	-1.0314	0.927663	0.992424		8.78612	-0.0851798	-1.06082	0.868226	0.99192		8.41037	-0.388046	-1.30862	0.320841	0.521824		8.41037	-0.16834	-1.12376	0.739404	0.968441
LOCUS_07080		495022..495252	6.15983	0.305603	1.23593	0.638922	0.9999		5.09975	0.0450097	1.03169	0.942973	0.99997		4.90874	-0.039831	-1.02799	0.947285	0.999997		6.31393	0.13636	1.09913	0.791482	0.93251		6.86023	0.364818	1.28772	0.465339	0.989854		6.45042	0.241845	1.1825	0.651028	0.991074		6.1251	-0.00635917	-1.00442	0.990401	0.994088		5.08192	-0.0842412	-1.06013	0.872211	0.993691
LOCUS_07090		495255..495617	9.71431	-0.37073	-1.29301	0.516678	0.9999		9.71431	-0.401219	-1.32062	0.434167	0.99997		9.71431	-0.700126	-1.62465	0.233098	0.999997		9.71431	-0.494692	-1.40902	0.214427	0.58358		9.71431	-0.176265	-1.12995	0.649394	0.990545		9.79201	-0.130736	-1.09485	0.746957	0.991074		9.96954	-0.283099	-1.21681	0.433092	0.622667		10.1463	-0.0688294	-1.04887	0.867388	0.993691
LOCUS_07100		495614..495739	5.46027	-1.07848	-2.1118	0.170235	0.9999		5.46027	-0.499135	-1.41337	0.487821	ND		5.46027	-0.263765	-1.20061	0.708323	0.999997		5.46027	-0.840358	-1.79049	0.169026	0.526011		5.46027	-1.00905	-2.01259	0.142837	0.948263		5.46027	-1.58348	-2.99691	0.0385283	0.928885		5.46027	-0.665264	-1.58586	0.240338	0.439661		5.46027	-0.220764	-1.16535	0.720323	0.966083
LOCUS_07110		495814..495951	7.34123	-0.196058	-1.14556	0.762751	0.9999		7.34123	-0.123927	-1.0897	0.837351	0.99997		7.34123	-0.537272	-1.45123	0.407915	0.999997		7.34701	-0.223019	-1.16717	0.694389	0.891571		7.34123	-0.292062	-1.22439	0.614332	0.990545		8.11135	-0.00759037	-1.00528	0.987333	0.998371		7.34123	-0.403091	-1.32234	0.437106	0.626205		9.09417	0.173427	1.12773	0.749794	0.970278
arcB		complement(496008..497009)	5.90562	-0.4606	-1.37611	0.414813	0.9999		5.90562	-0.227374	-1.1707	0.689051	0.99997		5.90562	-0.355119	-1.27909	0.500293	0.999997		10.3507	0.587419	1.50256	0.17385	0.532148		9.24339	0.533931	1.44787	0.217978	0.987722		6.17145	-0.0864461	-1.06175	0.828159	0.99192		10.5483	0.515251	1.42924	0.201903	0.395475		9.77602	0.596231	1.51176	0.177101	0.859667
LOCUS_07130		497171..497350	139.631	-0.140379	-1.10219	0.762642	0.9999		139.631	-0.131616	-1.09552	0.768641	0.99997		139.631	-0.0142141	-1.0099	0.976587	0.999997		139.631	-0.592616	-1.50798	0.116173	0.453196		139.631	-0.496439	-1.41073	0.203113	0.987722		139.631	-0.364357	-1.28731	0.374361	0.991074		139.631	-0.912494	-1.8823	0.00381587	0.0265858		139.631	-0.536341	-1.45029	0.161279	0.846556
LOCUS_07140		497347..497586	177.271	0.0210122	1.01467	0.963139	0.9999		179.211	0.022707	1.01586	0.96021	0.99997		176.103	-0.0783379	-1.0558	0.859018	0.999997		176.103	-0.449141	-1.36523	0.207432	0.57347		176.103	-0.359869	-1.28331	0.257878	0.989854		179.538	-0.136917	-1.09955	0.714085	0.991074		176.103	-0.722493	-1.65003	0.0140754	0.0691916		176.103	-0.309904	-1.23963	0.31534	0.927219
LOCUS_07150		complement(497631..497804)	27.9189	-0.27623	-1.21103	0.61974	0.9999		27.9189	-0.741028	-1.67137	0.150227	0.99997		27.9189	-0.152296	-1.11134	0.786618	0.999997		30.7278	-0.0869977	-1.06216	0.805986	0.937133		27.9189	-0.630246	-1.54783	0.115835	0.927511		29.5345	-0.0713939	-1.05073	0.869297	0.99192		27.9189	-0.397105	-1.31686	0.247725	0.447603		27.9189	-0.221778	-1.16617	0.593978	0.960549
LOCUS_07160		498324..498590	0.760229	0.677826	1.59973	0.524079	0.9999		2.12452	2.14718	4.42962	0.0389755	ND		1.22422	1.34408	2.53868	0.232742	0.999997		1.6673	1.56775	2.96442	0.0888858	0.41248		1.8251	1.80401	3.4919	0.0579173	0.771386		1.86415	1.79477	3.46961	0.0555723	ND		2.49175	2.03648	4.10245	0.0213646	0.0930955		1.21319	1.20942	2.31244	0.244278	0.900717
LOCUS_07170		498976..499437	6.83286	0.0439258	1.03092	0.945861	0.9999		6.50115	-0.0703219	-1.04995	0.910941	0.99997		6.50115	-0.0361656	-1.02538	0.955666	0.999997		8.41643	0.195576	1.14518	0.662407	0.875721		7.20803	0.0838998	1.05988	0.854224	0.990545		10.9642	0.654675	1.57426	0.140629	0.991074		12.253	0.639056	1.55731	0.144265	0.322948		8.14812	0.241396	1.18214	0.631579	0.964103
valS		complement(499569..502424)	646.467	0.0217317	1.01518	0.960934	0.9999		628.598	-0.0201295	-1.01405	0.960602	0.99997		628.598	-0.0417895	-1.02939	0.930841	0.999997		633.066	-0.233275	-1.1755	0.479842	0.781634		628.598	-0.194455	-1.14429	0.535026	0.989854		628.598	-0.18582	-1.13746	0.703421	0.991074		710.788	-0.166486	-1.12232	0.73651	0.852389		628.598	-0.199203	-1.14806	0.484526	0.955457
LOCUS_07190		complement(502424..502867)	218.346	0.179718	1.13266	0.63749	0.9999		198.749	0.0545132	1.03851	0.896224	0.99997		190.212	-0.0737701	-1.05246	0.851167	0.999997		222.701	0.00502815	1.00349	0.988894	0.99626		211.187	0.0365056	1.02563	0.891732	0.990545		219.892	0.0566577	1.04005	0.860761	0.99192		226.608	-0.0697023	-1.0495	0.840192	0.918026		221.43	0.0865686	1.06184	0.741415	0.968441
pepA		complement(503223..504677)	473.962	0.124676	1.09026	0.787531	0.9999		439.099	0.0258119	1.01805	0.952818	0.99997		427.151	-0.017244	-1.01202	0.972105	0.999997		428.117	-0.243694	-1.18402	0.519781	0.801224		427.151	-0.216645	-1.16203	0.563245	0.990494		436.16	-0.151246	-1.11053	0.736259	0.991074		476.847	-0.188693	-1.13973	0.683718	0.815235		427.151	-0.182685	-1.13499	0.613551	0.962755
lptF		505157..506098	131.492	0.0300323	1.02103	0.947812	0.9999		127.226	-0.0255788	-1.01789	0.956	0.99997		127.226	-0.00553888	-1.00385	0.990573	0.999997		132.168	-0.169495	-1.12466	0.578766	0.834726		127.226	-0.116789	-1.08432	0.696432	0.990545		138.469	-0.0306937	-1.0215	0.92099	0.994892		133.737	-0.251571	-1.1905	0.441703	0.629486		132.6	-0.0742056	-1.05278	0.823591	0.988255
LOCUS_07220		506095..506247	111.424	-0.061377	-1.04346	0.90477	0.9999		112.771	0.0086224	1.00599	0.985149	0.99997		117.209	0.0710581	1.05049	0.881627	0.999997		111.424	-0.238681	-1.17991	0.504327	0.796191		111.424	-0.163933	-1.12034	0.655945	0.990545		112.144	-0.143596	-1.10466	0.708748	0.991074		121.805	-0.19575	-1.14532	0.593229	0.747576		111.424	-0.224262	-1.16818	0.58212	0.960549
yjgQ		506256..507179	168.366	0.076787	1.05467	0.863406	0.9999		166.507	0.0683371	1.04851	0.877366	0.99997		182.162	0.203958	1.15185	0.646714	0.999997		170.096	-0.116274	-1.08393	0.734463	0.907536		168.415	-0.0219813	-1.01535	0.947791	0.993663		171.865	-0.0301154	-1.02109	0.931642	0.996072		168.431	-0.229721	-1.17261	0.516882	0.694538		166.413	-0.0581535	-1.04113	0.859406	0.993691
LOCUS_07240		complement(507162..507821)	9.34756	0.313926	1.24309	0.59531	0.9999		7.82276	0.0575556	1.0407	0.922606	0.99997		7.49685	-0.00873943	-1.00608	0.987679	0.999997		11.776	0.452277	1.3682	0.300818	0.658901		8.54924	0.101949	1.07322	0.810072	0.990545		10.5595	0.363148	1.28623	0.393647	0.991074		14.9416	0.688615	1.61173	0.100435	0.256558		8.95118	0.153507	1.11227	0.740121	0.968441
LOCUS_07250		complement(507839..508840)	7.46942	-0.0335605	-1.02354	0.959456	0.9999		7.42483	-0.225256	-1.16898	0.721487	0.99997		7.42483	-0.251313	-1.19029	0.709258	0.999997		7.42483	-0.416784	-1.33495	0.341203	0.686178		7.42483	-0.995271	-1.99346	0.0242785	0.511104		7.42483	-0.464011	-1.37937	0.290108	0.991074		8.84195	-0.118768	-1.08581	0.790388	0.885743		7.42483	-0.485701	-1.40027	0.277176	0.920983
ahr		complement(508970..510058)	15.765	0.451912	1.36785	0.446088	0.9999		16.319	0.459307	1.37488	0.365791	0.99997		17.1078	0.531139	1.44507	0.301182	0.999997		16.2933	0.226267	1.1698	0.546809	0.815471		12.4557	-0.0633777	-1.04491	0.871893	0.990545		12.5458	-0.0876476	-1.06264	0.828651	0.99192		18.9098	0.340403	1.26611	0.373828	0.572122		14.0105	0.0935023	1.06696	0.813583	0.986322
LOCUS_t00130		510183..510267	0	ND	ND	ND	ND		0	ND	ND	ND	ND		0	ND	ND	ND	ND		0	ND	ND	ND	ND		0	ND	ND	ND	ND		0	ND	ND	ND	ND		0	ND	ND	ND	ND		0	ND	ND	ND	ND
LOCUS_07270		510452..510871	50.7966	-0.114857	-1.08287	0.843511	0.9999		50.903	0.00881574	1.00613	0.984764	0.99997		50.7966	-0.241501	-1.18222	0.645244	0.999997		61.4602	0.0968448	1.06943	0.809489	0.938375		58.1403	0.124881	1.09042	0.744804	0.990545		60.4338	0.139576	1.10158	0.739265	0.991074		73.9187	0.259201	1.19682	0.544748	0.712275		59.0741	0.125192	1.09065	0.765635	0.975191
LOCUS_07280		complement(512595..512810)	24.0678	-0.0310799	-1.02178	0.965892	0.9999		24.0678	-0.108424	-1.07805	0.88637	0.99997		24.4014	-0.00802599	-1.00558	0.991342	0.999997		43.1136	0.69606	1.62007	0.171699	0.529343		43.052	0.808939	1.75192	0.13088	0.932709		42.1874	0.743023	1.67368	0.127005	0.991074		51.6411	0.859658	1.81461	0.096333	0.250263		41.5925	0.735443	1.66491	0.170034	0.852245
LOCUS_07290		complement(513272..513826)	174.669	-0.194088	-1.144	0.613294	0.9999		174.669	-0.108884	-1.07839	0.793422	0.99997		174.669	-0.178496	-1.1317	0.647217	0.999997		174.669	-0.209102	-1.15597	0.547969	0.816078		190.96	0.0339903	1.02384	0.898035	0.990545		190.555	-0.0101418	-1.00705	0.969918	0.997153		174.669	-0.560339	-1.47462	0.120875	0.287983		181.814	-0.0587014	-1.04153	0.825472	0.988307
LOCUS_07300		complement(514648..514785)	3.53606	0.109264	1.07868	0.890486	0.9999		4.41345	0.434085	1.35105	0.573641	ND		3.23433	-0.122456	-1.08859	0.881132	0.999997		4.69645	0.307391	1.23747	0.6187	0.854304		3.23433	-0.74353	-1.67427	0.381722	0.989854		3.23433	-0.400544	-1.32001	0.58713	0.991074		5.12644	0.332466	1.25916	0.573608	0.734043		4.4001	0.304762	1.23522	0.660063	0.965182
LOCUS_07310		514857..515165	7.217	0.0928222	1.06645	0.871543	0.9999		7.61811	0.17973	1.13267	0.738026	0.99997		6.89061	0.0402322	1.02828	0.940244	0.999997		8.91501	0.189531	1.14039	0.654562	0.871096		6.68088	-0.495145	-1.40946	0.306659	0.989854		7.7617	0.0663237	1.04705	0.879918	0.99192		14.5343	0.788779	1.72761	0.0440081	0.152196		6.68088	-0.192356	-1.14263	0.688653	0.965584
LOCUS_07320		515182..515463	11.0804	0.0423554	1.02979	0.94025	0.9999		10.4714	-0.201312	-1.14974	0.719727	0.99997		10.4714	-0.790037	-1.72912	0.166802	0.999997		12.3532	0.00719583	1.005	0.98597	0.995502		10.4714	-0.388121	-1.30869	0.41361	0.989854		10.4714	-0.345147	-1.27028	0.414454	0.991074		19.6326	0.560424	1.4747	0.174246	0.361891		10.4714	-0.477909	-1.39272	0.275902	0.919634
LOCUS_07330		515918..516253	20.0113	-0.311857	-1.2413	0.579129	0.9999		20.0113	-0.219695	-1.16449	0.69415	0.99997		20.0113	-0.373592	-1.29557	0.51641	0.999997		22.059	-0.0828646	-1.05912	0.833967	0.94724		20.0113	-0.313998	-1.24315	0.420871	0.989854		21.5639	-0.0418625	-1.02944	0.914958	0.994134		22.4059	-0.159308	-1.11675	0.66782	0.804056		20.0113	-0.160758	-1.11787	0.694512	0.965584
LOCUS_07340		516384..516695	18.0638	-0.367705	-1.2903	0.523927	0.9999		18.0638	-0.0149941	-1.01045	0.978694	0.99997		18.0638	-0.337964	-1.26397	0.562483	0.999997		18.0638	-0.48052	-1.39525	0.208534	0.575119		18.0638	-0.490648	-1.40508	0.252527	0.989854		18.0638	-0.317006	-1.24574	0.450712	0.991074		18.0638	-0.850202	-1.80275	0.0181931	0.0828227		18.0638	-0.421492	-1.33931	0.311116	0.927219
LOCUS_07350		516934..517215	19.0418	0.14051	1.10229	0.8066	0.9999		19.0092	0.14319	1.10434	0.799674	0.99997		17.1268	-0.00100897	-1.0007	0.998552	0.999997		18.6715	-0.0971801	-1.06968	0.783012	0.929781		19.8857	0.102603	1.07371	0.796604	0.990545		21.5822	0.185159	1.13694	0.647366	0.991074		22.5774	0.0768245	1.05469	0.843214	0.919075		19.2325	0.0354119	1.02485	0.930523	0.994342
LOCUS_07360		517221..517784	22.337	-0.162711	-1.11939	0.73336	0.9999		22.337	-0.0523423	-1.03695	0.920227	0.99997		22.337	-0.134869	-1.09799	0.775641	0.999997		23.4116	-0.155019	-1.11344	0.692192	0.889926		22.337	-0.123098	-1.08907	0.737489	0.990545		25.1456	0.0199671	1.01394	0.958505	0.996072		27.5096	-0.0215005	-1.01501	0.956994	0.978502		22.337	-0.181219	-1.13384	0.62746	0.964103
LOCUS_07370		518042..518269	4.78702	0.746552	1.67778	0.335678	0.9999		2.66422	-0.208035	-1.15511	0.776073	ND		2.68921	0.0114405	1.00796	0.988071	0.999997		6.22112	0.985493	1.97999	0.0810545	0.397783		3.2019	0.141251	1.10286	0.830602	0.990545		5.63259	0.917075	1.88828	0.112831	0.991074		10.5817	1.64917	3.13654	0.00199689	0.0162711		5.3259	0.853691	1.80712	0.116081	0.798375
LOCUS_07380		518304..518591	9.71537	-0.542385	-1.45638	0.385359	0.9999		9.71537	-0.433868	-1.35085	0.459254	0.99997		9.71537	-0.619045	-1.53586	0.309707	0.999997		10.4071	-0.121558	-1.08791	0.755311	0.917507		9.71537	-0.238853	-1.18005	0.609988	0.990545		9.71537	-0.246912	-1.18666	0.549585	0.991074		14.7378	0.279436	1.21372	0.447967	0.635199		10.26	-0.0514408	-1.0363	0.907199	0.994151
LOCUS_07390		518789..519280	15.2627	-0.112918	-1.08141	0.869787	0.9999		15.2627	-0.150622	-1.11005	0.811004	0.99997		15.2627	-0.00518427	-1.0036	0.993705	0.999997		24.9449	0.547365	1.46141	0.217789	0.587747		20.3932	0.369906	1.29227	0.434948	0.989854		21.7737	0.431415	1.34856	0.385676	0.991074		30.1081	0.718971	1.64601	0.0972026	0.251462		21.305	0.409114	1.32787	0.419209	0.948213
LOCUS_07400		519368..519544	22.8434	-0.142301	-1.10366	0.808264	0.9999		22.8434	-0.26983	-1.20567	0.598465	0.99997		23.5987	0.0252298	1.01764	0.964156	0.999997		27.0122	-0.0202648	-1.01415	0.959356	0.985928		22.8434	-0.460243	-1.37577	0.302429	0.989854		22.8434	-0.478885	-1.39367	0.25727	0.991074		29.3715	-0.00283544	-1.00197	0.994385	0.996079		22.8434	-0.338861	-1.26476	0.435301	0.953044
LOCUS_07410		519847..520770	31.9499	-0.118631	-1.0857	0.792551	0.9999		32.7038	0.0214554	1.01498	0.966865	0.99997		31.9499	-0.10966	-1.07897	0.809718	0.999997		46.8284	0.326057	1.25358	0.362157	0.707556		31.9499	-0.199313	-1.14815	0.593086	0.990494		32.3644	-0.135043	-1.09813	0.712425	0.991074		57.9498	0.534202	1.44814	0.0739851	0.211707		31.9778	-0.1339	-1.09726	0.702375	0.966083
LOCUS_07420		521542..522024	18.345	-0.146992	-1.10726	0.897627	0.9999		18.345	-0.100314	-1.07201	0.930499	0.99997		31.5163	0.865795	1.82234	0.180215	0.999997		42.5504	1.0935	2.13391	0.0677594	0.363304		20.0283	0.142936	1.10415	0.814616	0.990545		35.4672	0.922452	1.89533	0.109286	0.991074		49.0197	1.20767	2.30964	0.0337856	0.128214		29.9992	0.688713	1.61184	0.236989	0.900717
LOCUS_07430		522017..522301	0.565927	4.00831	16.0924	0.189861	0.9999		0	ND	ND	ND	ND		0	ND	ND	ND	ND		0	ND	ND	ND	ND		0	ND	ND	ND	ND		0	ND	ND	ND	ND		0	ND	ND	ND	ND		0	ND	ND	ND	ND
LOCUS_07440		522342..522827	5.22097	-5.72894	-53.0376	0.000516359	0.0499038		5.98862	0.152943	1.11184	0.901813	0.99997		5.22097	-0.102522	-1.07365	0.938159	0.999997		5.22097	-8.37312	-331.559	0.00615282	0.100443		5.58321	-0.246237	-1.18611	0.84606	0.990545		5.22097	-8.30196	-315.602	0.00697339	0.407029		6.5236	-0.174408	-1.1285	0.89158	0.94277		5.22097	-8.28295	-311.469	0.00667795	0.192196
LOCUS_07450		523356..523952	35.794	0.203805	1.15173	0.721421	0.9999		32.4571	0.0935438	1.06699	0.854209	0.99997		32.3391	0.0682959	1.04848	0.890298	0.999997		71.0786	1.01641	2.02288	0.00483468	0.0849125		41.6266	0.353914	1.27802	0.366308	0.989854		38.416	0.201482	1.14988	0.542663	0.991074		132.572	1.81557	3.51998	3.2246e-07	1.00594e-05		36.3343	0.141315	1.10291	0.715018	0.966083
LOCUS_07460		complement(524221..525234)	38.9431	0.234826	1.17676	0.601083	0.9999		35.5282	0.120977	1.08747	0.770969	0.99997		33.3384	0.0335338	1.02352	0.937704	0.999997		46.0602	0.283889	1.21747	0.431395	0.750936		39.47	0.170139	1.12517	0.583813	0.990494		39.7087	0.140137	1.10201	0.640109	0.991074		55.0273	0.439761	1.35638	0.201372	0.395152		41.395	0.222531	1.16678	0.430222	0.951393
LOCUS_07470		complement(525246..526010)	19.8179	0.0528618	1.03732	0.922778	0.9999		19.4246	0.0621429	1.04402	0.903244	0.99997		18.9394	0.0298582	1.02091	0.953454	0.999997		26.5349	0.301526	1.23245	0.416291	0.743973		21.1893	0.0813665	1.05802	0.83103	0.990545		22.3753	0.123032	1.08902	0.7243	0.991074		29.7497	0.361936	1.28515	0.322595	0.523814		19.2589	-0.0757279	-1.05389	0.853082	0.993691
LOCUS_07480		complement(526007..526267)	5.73967	-0.267724	-1.20391	0.665209	0.9999		7.00331	0.275358	1.21029	0.637804	0.99997		5.73967	-0.168281	-1.12372	0.81448	0.999997		5.73967	-0.431393	-1.34853	0.406161	0.73687		5.73967	-0.410132	-1.32881	0.411361	0.989854		5.73967	-0.326022	-1.25355	0.552177	0.991074		10.0421	0.479551	1.39431	0.2447	0.444541		6.51224	0.0470611	1.03316	0.923354	0.994151
LOCUS_07490		complement(526601..527110)	8.3849	0.444128	1.36049	0.446652	0.9999		6.10597	-0.0953577	-1.06833	0.870538	0.99997		6.10597	-0.136957	-1.09958	0.825994	0.999997		7.94623	0.129444	1.09387	0.759485	0.919316		6.10597	-1.01058	-2.01473	0.0469953	0.722029		6.10597	-0.530377	-1.44431	0.21231	0.991074		10.2818	0.404707	1.32382	0.310546	0.51131		6.10597	-0.338385	-1.26434	0.460516	0.955457
LOCUS_07500		complement(527107..527532)	8.3519	-0.0623145	-1.04414	0.914217	0.9999		8.3519	-0.391472	-1.31173	0.512909	0.99997		8.3519	-0.389912	-1.31031	0.56153	0.999997		8.3519	-0.717612	-1.64446	0.101387	0.432253		8.3519	-1.51719	-2.86234	0.00737774	0.236235		8.3519	-0.836919	-1.78623	0.0656095	0.991074		9.47647	-0.180947	-1.13363	0.650256	0.79074		8.3519	-0.725624	-1.65362	0.144224	0.831876
LOCUS_07510		527808..528101	20.2321	-0.0686993	-1.04877	0.904776	0.9999		21.5292	0.0772416	1.055	0.890941	0.99997		20.2321	-0.0593404	-1.04199	0.91661	0.999997		20.2321	-0.381724	-1.3029	0.337802	0.683477		20.2321	-0.455578	-1.37133	0.262776	0.989854		20.2321	-0.485554	-1.40012	0.233382	0.991074		22.2301	-0.208309	-1.15533	0.569154	0.7311		20.2321	-0.214352	-1.16018	0.584397	0.960549
LOCUS_07520		528080..528298	40.2824	-0.201091	-1.14957	0.742229	0.9999		40.2824	-0.0991209	-1.07112	0.861859	0.99997		40.2824	-0.063098	-1.04471	0.910398	0.999997		40.2824	-0.412562	-1.33105	0.332682	0.679571		40.2824	-0.273441	-1.20869	0.523233	0.989854		40.2824	-0.253192	-1.19184	0.556447	0.991074		40.2824	-0.515161	-1.42915	0.208742	0.403902		40.2824	-0.345856	-1.2709	0.448468	0.955457
LOCUS_07530		528340..528591	33.841	0.00719322	1.005	0.990167	0.9999		34.3135	0.0379844	1.02668	0.946636	0.99997		37.0288	0.15179	1.11095	0.782057	0.999997		35.9997	-0.108615	-1.07819	0.795657	0.933424		39.3321	0.128333	1.09303	0.753501	0.990545		33.2836	-0.173304	-1.12764	0.66829	0.991074		37.305	-0.156346	-1.11446	0.684957	0.816458		33.8863	-0.105881	-1.07615	0.807529	0.985998
LOCUS_07540		complement(530101..530754)	55.6372	-0.101993	-1.07326	0.83663	0.9999		55.6372	-0.0912425	-1.06529	0.838137	0.99997		55.6372	-0.237397	-1.17886	0.618238	0.999997		68.3625	0.11927	1.08619	0.763496	0.920775		60.3911	0.0562685	1.03977	0.8702	0.990545		72.3517	0.275598	1.2105	0.463293	0.991074		66.4119	-0.0205392	-1.01434	0.951657	0.976179		64.9852	0.138273	1.10059	0.6892	0.965584
LOCUS_07550		complement(530908..531168)	8.54262	-0.239994	-1.18099	0.677512	0.9999		8.54262	-0.229988	-1.17282	0.671352	0.99997		8.54262	-0.479889	-1.39464	0.412937	0.999997		9.15621	-0.121775	-1.08807	0.771523	0.924762		9.80782	0.0863693	1.06169	0.851846	0.990545		10.9713	0.209201	1.15605	0.596477	0.991074		9.72412	-0.134581	-1.09777	0.736326	0.852389		11.1647	0.253318	1.19195	0.555047	0.960549
LOCUS_07560		complement(531189..531809)	18.938	-0.168841	-1.12415	0.737812	0.9999		20.7475	0.132263	1.09601	0.810057	0.99997		18.938	-0.0413382	-1.02907	0.933754	0.999997		24.2589	0.163326	1.11987	0.680503	0.88542		24.7306	0.302454	1.23324	0.45014	0.989854		26.3649	0.356508	1.28032	0.381971	0.991074		25.0682	0.114485	1.08259	0.778811	0.88067		26.6574	0.389995	1.31039	0.335378	0.936251
LOCUS_07570		complement(531842..532159)	27.7823	0.0749074	1.05329	0.9019	0.9999		25.7528	-0.19694	-1.14626	0.752944	0.99997		25.7528	-0.164017	-1.1204	0.787449	0.999997		36.5577	0.29238	1.22466	0.449383	0.763504		32.8261	0.247457	1.18711	0.562164	0.990494		34.6719	0.286424	1.21961	0.527522	0.991074		38.4755	0.270527	1.20625	0.4663	0.652257		32.199	0.204333	1.15215	0.646302	0.965182
LOCUS_07580		complement(532335..532706)	31.3519	0.0525182	1.03707	0.911331	0.9999		32.0809	0.0966261	1.06927	0.849384	0.99997		29.8221	-0.0489966	-1.03455	0.914126	0.999997		36.8061	0.0780004	1.05555	0.854498	0.954496		29.8221	-0.192653	-1.14286	0.641051	0.990545		29.8221	-0.172837	-1.12727	0.663795	0.991074		39.9273	0.0960642	1.06885	0.801315	0.893037		34.6011	0.0789745	1.05627	0.828171	0.988699
LOCUS_07590		complement(532916..533146)	23.1506	-0.149607	-1.10927	0.791712	0.9999		23.9029	0.038823	1.02728	0.945153	0.99997		23.1506	-0.00798166	-1.00555	0.988213	0.999997		26.3113	-0.0385011	-1.02705	0.920362	0.973099		23.1506	-0.320087	-1.24841	0.43692	0.989854		23.1506	-0.184384	-1.13633	0.643496	0.991074		27.3673	-0.0803554	-1.05728	0.839954	0.918021		24.1789	-0.069945	-1.04968	0.864368	0.993691
LOCUS_07600		complement(533232..534011)	33.2205	0.0257519	1.01801	0.955015	0.9999		36.4302	0.152216	1.11128	0.710756	0.99997		32.6025	-0.0200749	-1.01401	0.96289	0.999997		41.276	0.114316	1.08246	0.730456	0.905278		34.8933	-0.019216	-1.01341	0.957013	0.995008		34.613	-0.0677018	-1.04805	0.853563	0.99192		47.687	0.223442	1.16752	0.530431	0.70152		33.418	-0.0999937	-1.07177	0.789547	0.981752
LOCUS_07610		complement(533996..534334)	29.4927	0.169209	1.12444	0.770565	0.9999		25.9372	-0.0301473	-1.02112	0.956936	0.99997		25.9372	-0.00804603	-1.00559	0.988238	0.999997		32.0239	0.0821542	1.0586	0.825929	0.945333		31.1572	0.152032	1.11113	0.714081	0.990545		30.1357	0.0677477	1.04808	0.878928	0.99192		37.7912	0.223811	1.16781	0.558508	0.723381		35.4619	0.319199	1.24764	0.452193	0.955457
LOCUS_07620		complement(534481..534822)	24.7675	-0.0164839	-1.01149	0.978846	0.9999		25.307	0.0457504	1.03222	0.937262	0.99997		25.8381	0.071785	1.05102	0.901831	0.999997		38.3797	0.446842	1.36305	0.296946	0.654158		29.2161	0.161237	1.11825	0.713171	0.990545		34.5905	0.372058	1.2942	0.411872	0.991074		41.3757	0.455566	1.37132	0.235343	0.434685		29.4707	0.157332	1.11522	0.729336	0.968441
LOCUS_07630		complement(534840..535298)	8.31657	-2.49023	-5.61866	0.000524326	0.0500404		8.31657	-0.815022	-1.75932	0.242277	0.99997		8.31657	-8.4821	-357.574	0.00418928	0.195751		8.31657	-1.75046	-3.36466	0.0019446	0.0442166		8.31657	-0.808241	-1.75108	0.109843	0.927511		8.31657	-1.13109	-2.19024	0.0615348	0.991074		8.31657	-0.656784	-1.57656	0.170027	0.357304		8.31657	-2.78839	-6.90858	1.75312e-05	0.000943781
LOCUS_07640		535809..536246	2.30463	0.157351	1.11524	0.868733	0.9999		2.59969	0.405329	1.32439	0.628865	0.99997		2.7049	0.404782	1.32389	0.646021	0.999997		5.64414	1.34755	2.5448	0.0381289	0.279295		3.70993	0.859386	1.81427	0.184939	0.974608		2.55324	0.28443	1.21793	0.676058	0.991074		7.59027	1.67565	3.19463	0.0139996	0.0689424		4.99074	1.25906	2.3934	0.0594289	0.6478
LOCUS_07650		536568..536843	9.53837	0.158871	1.11641	0.78986	0.9999		9.87467	0.223078	1.16722	0.722505	0.99997		12.1465	0.508487	1.42256	0.423479	0.999997		18.1772	0.918009	1.88951	0.0486508	0.3113		16.1704	0.859371	1.81425	0.0729953	0.836115		15.3096	0.720493	1.64775	0.0929065	0.991074		20.6608	0.994048	1.99177	0.0163394	0.0760547		14.9572	0.705001	1.63015	0.122603	0.816952
LOCUS_07660		complement(537377..537778)	30.1721	-0.241955	-1.18259	0.621431	0.9999		30.1721	-0.105276	-1.0757	0.850861	0.99997		40.9007	0.436033	1.35288	0.424116	0.999997		50.9406	0.57084	1.48539	0.163914	0.522077		39.4745	0.312129	1.24154	0.484805	0.989854		38.8888	0.260049	1.19752	0.534246	0.991074		52.0818	0.508431	1.4225	0.21234	0.408075		38.0524	0.243892	1.18418	0.555137	0.960549
fecD		complement(538197..539099)	32.6025	-0.209729	-1.15647	0.663668	0.9999		33.1382	0.014594	1.01017	0.978081	0.99997		52.9974	0.690979	1.61438	0.135851	0.999997		63.8073	0.772937	1.70874	0.0585179	0.338803		46.2522	0.418318	1.33637	0.26417	0.989854		46.0825	0.391937	1.31215	0.224202	0.991074		73.9566	0.894584	1.85907	0.0214032	0.0931577		45.7593	0.388943	1.30943	0.294165	0.920983
fecC		complement(539096..540064)	37.3285	-0.129067	-1.09359	0.775656	0.9999		37.3285	-0.170407	-1.12538	0.722835	0.99997		56.9393	0.594721	1.51018	0.213297	0.999997		70.502	0.723272	1.65092	0.0560674	0.331486		51.9287	0.38779	1.30839	0.353781	0.989854		51.8796	0.365885	1.28867	0.346423	0.991074		79.2158	0.798013	1.7387	0.0383448	0.13949		53.875	0.429279	1.34656	0.235044	0.900717
LOCUS_07690		complement(540090..540536)	41.7539	0.0150178	1.01046	0.978496	0.9999		47.3941	0.18967	1.1405	0.725087	0.99997		66.2508	0.675914	1.59761	0.179784	0.999997		100.11	1.08606	2.12294	0.0129103	0.156067		71.0987	0.704417	1.62949	0.111821	0.927511		64.838	0.546196	1.46023	0.212758	0.991074		102.265	1.02566	2.03589	0.0125242	0.0636455		73.6951	0.740106	1.6703	0.0845719	0.725747
LOCUS_07700		complement(540511..540867)	77.2652	-0.0986296	-1.07076	0.835657	0.9999		80.7643	0.05794	1.04098	0.909216	0.99997		129.435	0.728273	1.65666	0.130712	0.999997		169.804	0.951647	1.93408	0.0208502	0.201385		126.173	0.630944	1.54858	0.114115	0.927511		118.309	0.516067	1.43005	0.124439	0.991074		186.44	0.993832	1.99147	0.0129053	0.0650199		136.036	0.726908	1.65509	0.0354588	0.521532
LOCUS_07710		complement(541034..542110)	125.639	-0.191447	-1.14191	0.698647	0.9999		125.639	-0.0204309	-1.01426	0.969127	0.99997		199.16	0.648865	1.56793	0.19012	0.999997		260.127	0.876146	1.83547	0.0353455	0.268162		195.446	0.571142	1.4857	0.184069	0.974301		199.252	0.576498	1.49122	0.145557	0.991074		287.585	0.927808	1.90238	0.032693	0.125124		219.336	0.724685	1.65254	0.0681181	0.674243
LOCUS_07720		complement(542071..543357)	166.523	-0.17233	-1.12688	0.68476	0.9999		174.536	0.0545884	1.03856	0.902912	0.99997		267.215	0.657191	1.57701	0.228383	0.999997		338.815	0.835084	1.78396	0.0149445	0.167689		270.318	0.617496	1.53421	0.073054	0.836115		256.935	0.515944	1.42993	0.173046	0.991074		378.09	0.897966	1.86344	0.0199024	0.0882844		304.57	0.774756	1.7109	0.0143119	0.32161
fecR		complement(543443..544396)	29.948	0.150194	1.10972	0.744049	0.9999		27.8186	0.0782634	1.05575	0.86189	0.99997		29.258	0.142372	1.10372	0.739905	0.999997		34.7125	0.164221	1.12056	0.612101	0.851184		33.5131	0.227902	1.17113	0.538681	0.989854		28.1072	-0.0634939	-1.04499	0.865029	0.99192		45.8141	0.467923	1.38312	0.15057	0.331358		35.8956	0.307323	1.23741	0.395955	0.948039
LOCUS_07740		complement(544550..544912)	45.2556	0.0297252	1.02082	0.953734	0.9999		48.5365	0.161697	1.1186	0.729684	0.99997		44.4203	0.036656	1.02573	0.943781	0.999997		68.0642	0.432803	1.34985	0.268711	0.629637		60.1092	0.362885	1.28599	0.286932	0.989854		57.3162	0.257921	1.19575	0.497326	0.991074		71.1113	0.396153	1.31599	0.22339	0.421156		71.0317	0.584977	1.50001	0.108161	0.775999
LOCUS_07750		545204..545503	38.8471	-0.0319582	-1.0224	0.955964	0.9999		38.8471	-0.196083	-1.14558	0.750552	0.99997		38.8471	-0.134937	-1.09804	0.825306	0.999997		61.8351	0.526703	1.44063	0.260783	0.627124		54.7006	0.464716	1.38005	0.331681	0.989854		55.205	0.44401	1.36038	0.3539	0.991074		65.6309	0.513562	1.42757	0.283277	0.483674		59.7617	0.566305	1.48073	0.256807	0.909456
LOCUS_07760		545505..545690	46.5874	0.358566	1.28215	0.594068	0.9999		35.785	-0.0691874	-1.04913	0.910496	0.99997		36.4993	0.0351513	1.02466	0.958567	0.999997		60.3429	0.589845	1.50509	0.201476	0.565423		69.9044	0.91316	1.88317	0.0487029	0.727259		62.3539	0.717534	1.64437	0.150504	0.991074		57.5149	0.418914	1.33692	0.356901	0.55488		70.5117	0.903438	1.87052	0.0620304	0.648402
LOCUS_07770		545691..545900	89.9731	0.0632513	1.04482	0.899316	0.9999		87.431	0.0213809	1.01493	0.964715	0.99997		97.8751	0.207514	1.1547	0.665066	0.999997		106.169	0.0923404	1.0661	0.827634	0.945583		139.84	0.599679	1.51538	0.137533	0.947821		90.7548	-0.0650851	-1.04615	0.86699	0.99192		93.533	-0.190073	-1.14082	0.598937	0.751177		130.508	0.476399	1.39127	0.253455	0.904648
LOCUS_07780		546458..546784	30.1381	0.129627	1.09401	0.827328	0.9999		31.1892	0.197773	1.14693	0.69701	0.99997		30.1463	0.137562	1.10004	0.798085	0.999997		35.1836	0.165305	1.1214	0.681103	0.885422		35.6582	0.289014	1.22181	0.481918	0.989854		40.7275	0.44727	1.36346	0.273289	0.991074		30.4186	-0.141484	-1.10304	0.718154	0.839118		37.7522	0.354709	1.27873	0.40528	0.948039
LOCUS_07790		546784..547023	19.0678	0.183379	1.13554	0.762066	0.9999		17.4404	0.0962636	1.069	0.8615	0.99997		18.5852	0.195256	1.14493	0.720596	0.999997		22.438	0.246782	1.18656	0.505881	0.797057		18.4447	0.0741148	1.05271	0.847318	0.990545		23.1713	0.363961	1.28695	0.371325	0.991074		21.6669	0.0970209	1.06956	0.782419	0.882128		23.9473	0.430231	1.34745	0.304441	0.924738
LOCUS_07800		547280..547600	24.6549	0.189455	1.14033	0.767766	0.9999		22.1497	0.0458902	1.03232	0.937444	0.99997		25.7485	0.264654	1.20135	0.650421	0.999997		34.311	0.467583	1.38279	0.261062	0.627124		29.1055	0.335121	1.26148	0.439689	0.989854		33.3728	0.505644	1.41976	0.260467	0.991074		32.0322	0.277199	1.21184	0.512261	0.691733		35.8095	0.614277	1.53079	0.166678	0.851896
LOCUS_07810		547561..547827	26.8915	-0.0704712	-1.05006	0.920225	0.9999		28.4681	0.0884422	1.06322	0.884859	0.99997		26.8915	-0.00173366	-1.0012	0.997838	0.999997		36.0971	0.237053	1.17858	0.603795	0.847899		37.7312	0.411616	1.33018	0.338574	0.989854		37.0194	0.353741	1.27787	0.430984	0.991074		41.3019	0.332833	1.25948	0.426793	0.616631		33.6509	0.226909	1.17033	0.63222	0.964239
LOCUS_07820		complement(548066..549451)	33.4245	-0.0909888	-1.0651	0.837761	0.9999		33.4245	-0.023774	-1.01662	0.960072	0.99997		33.4245	-0.0681355	-1.04836	0.873269	0.999997		40.5051	0.0705806	1.05014	0.827229	0.945583		36.4934	0.0284419	1.01991	0.936301	0.993526		36.9074	0.0101496	1.00706	0.979574	0.997314		45.9321	0.152295	1.11134	0.665974	0.802846		35.393	-0.0343078	-1.02407	0.915729	0.994151
LOCUS_07830		complement(549501..549848)	4.42286	-0.216385	-1.16182	0.727331	0.9999		4.42286	-0.392115	-1.31232	0.515946	0.99997		4.58106	0.00211624	1.00147	0.997413	0.999997		5.58327	0.111596	1.08042	0.803552	0.936768		7.11783	0.569503	1.48401	0.204546	0.987722		5.49467	0.15663	1.11468	0.766212	0.991074		12.439	1.16252	2.23848	0.00816908	0.0468389		6.62958	0.447452	1.36363	0.335813	0.936251
LOCUS_07840		complement(549845..550246)	4.13802	0.0578304	1.0409	0.926996	0.9999		3.93406	-0.287411	-1.22045	0.662869	0.99997		4.37545	0.151398	1.11064	0.809581	0.999997		5.54098	0.270608	1.20632	0.534302	0.80881		6.16497	0.533236	1.44717	0.246882	0.989854		5.56378	0.349983	1.27455	0.462732	0.991074		8.38618	0.766344	1.70095	0.0694493	0.203365		5.13463	0.251148	1.19015	0.607005	0.962359
LOCUS_07850		complement(550998..551399)	1.00645	-0.108944	-1.07844	0.90218	0.9999		1.00394	-1.03585	-2.05033	0.298215	ND		1.11838	0.0471288	1.03321	0.957583	0.999997		2.01392	0.752712	1.68496	0.264335	0.629388		1.21284	0.125737	1.09106	0.872446	0.990545		1.74751	0.595218	1.5107	0.424555	0.991074		4.14606	1.62483	3.08406	0.0288997	0.11415		1.00394	-1.14148	-2.20608	0.207115	0.879093
LOCUS_07860		complement(551659..551853)	2.07483	0.485262	1.39984	0.579832	0.9999		1.45639	-0.474065	-1.38902	0.653842	ND		2.72554	0.881562	1.84237	0.290388	0.999997		4.57139	1.39451	2.62899	0.0370562	0.274331		5.61834	1.80141	3.48561	0.0137772	0.360714		2.78393	0.771679	1.70726	0.35601	0.991074		7.68598	2.03753	4.10542	0.00286656	0.0215006		1.45639	-0.130781	-1.09489	0.880745	0.993691
LOCUS_07870		complement(551936..552178)	4.81213	0.812048	1.7557	0.410293	0.9999		2.50485	-0.482217	-1.39689	0.614727	ND		3.86738	0.575805	1.49051	0.484313	0.999997		7.66685	1.37768	2.59851	0.0159608	0.172232		4.51178	0.728168	1.65653	0.238883	0.989854		5.46204	0.963107	1.9495	0.090749	0.991074		15.9246	2.32852	5.02291	5.56028e-06	0.000125361		3.99624	0.548915	1.46299	0.38385	0.948039
LOCUS_07880		553665..554072	2.08716	0.286531	1.2197	0.681456	0.9999		1.68828	-0.182385	-1.13476	0.802761	ND		1.68828	-0.07447	-1.05297	0.921386	0.999997		2.18155	0.143799	1.10481	0.809436	0.938375		1.68828	-0.385201	-1.30604	0.521456	0.989854		1.68828	-0.393678	-1.31374	0.52166	0.991074		3.97434	0.902079	1.86876	0.10208	0.259657		1.68828	-0.134316	-1.09757	0.810264	0.986048
LOCUS_07890		554167..554769	0.33889	-0.00773986	-1.00538	0.994211	0.9999		0.675476	0.864652	1.8209	0.39856	ND		0.541681	0.494558	1.40889	0.658989	0.999997		1.81396	2.15212	4.44479	0.00391497	0.0741351		1.3463	1.83716	3.57306	0.0249828	0.519954		1.22772	1.60371	3.03923	0.0838495	0.991074		3.38128	2.94467	7.69902	9.70471e-05	0.00140214		1.14113	1.58144	2.99268	0.0558048	0.632708
LOCUS_07900		556958..557194	5.81804	-0.643388	-1.56199	0.338629	0.9999		5.81804	-1.37475	-2.59322	0.0392261	ND		5.81804	-1.06304	-2.08932	0.10416	0.999997		17.941	1.39687	2.63329	0.000684874	0.0196708		5.81804	-0.151742	-1.11091	0.770857	0.990545		6.66362	0.0425974	1.02997	0.937351	0.996072		38.279	2.38847	5.236	7.93898e-08	2.94552e-06		7.17404	0.173742	1.12798	0.738967	0.968441
LOCUS_07910		557212..557829	1.9665	-0.113426	-1.08179	0.85939	0.9999		2.56586	0.370206	1.29254	0.573759	0.99997		2.38445	0.273365	1.20862	0.658539	0.999997		13.8337	2.58102	5.98362	9.96275e-10	7.38984e-08		2.89362	0.439346	1.35599	0.384235	0.989854		4.14593	0.920836	1.89321	0.0613883	0.991074		26.9967	3.44553	10.8945	1.97018e-14	1.46195e-12		3.99533	0.8835	1.84484	0.0708538	0.685012
LOCUS_07920		558197..559339	92.9466	-2.17132	-4.50435	0.000833887	0.0723492		92.9466	-2.02942	-4.08241	0.00181108	0.236919		92.9466	-2.34426	-5.07801	0.000246742	0.0171271		92.9466	-2.70652	-6.52745	3.87574e-06	0.000213026		92.9466	-2.34157	-5.06853	4.1988e-05	0.00233242		92.9466	-2.7428	-6.69368	5.09974e-07	0.000213619		92.9466	-3.3362	-10.0994	1.33597e-09	6.58761e-08		92.9466	-3.11476	-8.66234	4.78542e-08	3.08701e-06
LOCUS_07930		559580..559714	107.166	-2.18351	-4.54257	0.00278041	0.216616		107.166	-1.88016	-3.68116	0.00863217	0.768503		107.166	-2.39833	-5.27193	0.000786453	0.0444053		107.166	-2.20197	-4.60109	0.000523936	0.0157593		107.166	-2.31665	-4.98175	0.000117111	0.00608481		107.166	-2.50447	-5.67441	7.66485e-05	0.0170567		107.166	-2.71939	-6.58594	7.43468e-06	0.000160518		107.166	-2.85407	-7.23037	1.06733e-05	0.000587266
LOCUS_07940		559677..560069	106.943	-1.96365	-3.90046	0.00203883	0.1656		106.943	-1.88479	-3.69299	0.00396937	0.426618		106.943	-2.38533	-5.22465	0.000150384	0.0110467		106.943	-2.51875	-5.73087	2.60154e-05	0.00125005		106.943	-2.23833	-4.71849	0.0001496	0.00750662		106.943	-2.63565	-6.21454	1.22655e-05	0.0037975		106.943	-2.73255	-6.64631	1.01106e-05	0.000204432		106.943	-3.13697	-8.79677	4.08943e-07	2.52903e-05
LOCUS_07950		560063..561037	125.8	-2.00737	-4.02049	0.000555597	0.0517315		125.8	-1.92612	-3.80031	0.00108702	0.169946		125.8	-2.4915	-5.62364	5.1378e-05	0.00422528		125.8	-2.32554	-5.01255	5.85579e-05	0.00255647		125.8	-2.27113	-4.82702	4.20256e-05	0.00233242		125.8	-2.39016	-5.24216	1.66376e-05	0.00476567		125.8	-2.45152	-5.46991	1.93703e-06	4.95008e-05		125.8	-2.72123	-6.59436	4.00329e-06	0.000230436
LOCUS_07960		561072..561299	4.0937	-0.619343	-1.53617	0.409071	0.9999		4.44861	0.117078	1.08454	0.855641	0.99997		4.0937	-0.133775	-1.09716	0.848593	0.999997		7.10647	0.569088	1.48358	0.300518	0.658622		4.63558	0.066301	1.04703	0.910733	0.990767		4.0937	-0.450706	-1.36671	0.489304	0.991074		7.11768	0.471966	1.387	0.403266	0.596625		4.0937	-0.2635	-1.20039	0.638371	0.965182
LOCUS_07970		complement(561423..561734)	2.60296	-1.96914	-3.91535	0.04737	0.9999		2.60296	-0.832008	-1.78016	0.299897	ND		2.60296	-1.02216	-2.03096	0.279961	0.999997		3.89229	0.371404	1.29361	0.52932	0.807769		2.60296	-0.698924	-1.62329	0.297445	0.989854		2.60296	-0.598206	-1.51383	0.377758	0.991074		4.00219	0.305562	1.2359	0.594856	0.748885		2.60296	-0.602857	-1.51872	0.379011	0.947972
LOCUS_07980		561794..562234	7.17792	-0.316646	-1.24543	0.61311	0.9999		8.48082	0.251923	1.19079	0.628091	0.99997		7.17792	-0.421391	-1.33922	0.500718	0.999997		12.769	0.64893	1.56801	0.109866	0.444385		10.1262	0.426171	1.34366	0.346761	0.989854		10.5292	0.443479	1.35988	0.313234	0.991074		14.4417	0.729297	1.65783	0.0770795	0.216429		8.71954	0.190863	1.14145	0.696341	0.965584
LOCUS_07990		562713..563048	2.65034	0.189279	1.14019	0.805749	0.9999		2.78225	0.277308	1.21193	0.703154	ND		2.79903	0.285099	1.21849	0.700726	0.999997		6.86406	1.37433	2.59248	0.0187047	0.187047		3.98462	0.711103	1.63705	0.258737	0.989854		3.32522	0.384225	1.30516	0.529816	0.991074		6.31974	1.15347	2.22448	0.0440512	0.152277		3.73382	0.565266	1.47966	0.328049	0.93409
LOCUS_08000		563064..563336	2.96405	0.0351674	1.02468	0.962074	0.9999		3.72423	0.385708	1.3065	0.574284	ND		3.74493	0.402709	1.32199	0.530481	0.999997		5.04679	0.607733	1.52386	0.240998	0.608669		4.01598	0.391415	1.31168	0.489735	0.989854		4.54646	0.533894	1.44783	0.306585	0.991074		6.7045	0.916396	1.88739	0.106175	0.265787		4.00311	0.366775	1.28947	0.491179	0.955457
LOCUS_08010		563333..563539	6.46865	-0.325528	-1.25312	0.651146	0.9999		6.46865	-0.575929	-1.49064	0.407351	0.99997		6.46865	-0.286325	-1.21953	0.684347	0.999997		7.83002	0.0555046	1.03922	0.915983	0.972094		6.46865	-0.395719	-1.3156	0.453644	0.989854		6.46865	-0.252185	-1.19101	0.657558	0.991074		9.25257	0.214664	1.16043	0.65076	0.790992		8.9941	0.342595	1.26804	0.507993	0.955457
yeeT_1		563602..563823	6.02779	0.122448	1.08858	0.861331	0.9999		5.48174	-0.323177	-1.25108	0.6198	0.99997		7.18639	0.387717	1.30832	0.567684	0.999997		9.12803	0.509683	1.42374	0.31494	0.670382		8.05285	0.439952	1.35656	0.396238	0.989854		8.76475	0.526347	1.44028	0.317404	0.991074		11.4314	0.734374	1.66368	0.0810511	0.223395		8.9321	0.573921	1.48856	0.268396	0.917771
LOCUS_08030		563986..564354	8.01972	0.283809	1.2174	0.614411	0.9999		8.70318	0.411108	1.32971	0.472567	0.99997		7.53865	0.213903	1.15982	0.716558	0.999997		12.3006	0.704684	1.62979	0.0836313	0.401081		9.57701	0.44961	1.36567	0.258025	0.989854		11.1238	0.627648	1.54504	0.121918	0.991074		12.97	0.676736	1.59852	0.0681141	0.200925		11.2963	0.671371	1.59259	0.147071	0.834482
LOCUS_08040		564443..564853	7.10042	0.190372	1.14106	0.729038	0.9999		6.53198	0.0705483	1.05012	0.907482	0.99997		8.65861	0.490286	1.40472	0.395971	0.999997		10.6428	0.575753	1.49046	0.149452	0.502117		10.4706	0.667905	1.58876	0.107384	0.926784		9.09027	0.419515	1.33748	0.308865	0.991074		13.7682	0.847012	1.79877	0.0281748	0.112273		9.15905	0.44958	1.36564	0.309113	0.926349
LOCUS_08050		564816..565304	9.29228	-0.168802	-1.12412	0.773188	0.9999		9.29228	-0.382394	-1.3035	0.504098	0.99997		9.29228	-0.423857	-1.34151	0.47981	0.999997		10.4396	-0.0164609	-1.01148	0.969155	0.989185		10.1336	0.0477949	1.03368	0.911764	0.990767		9.40976	-0.0953896	-1.06835	0.836397	0.99192		11.2335	-0.0126844	-1.00883	0.976219	0.988375		11.1736	0.168267	1.12371	0.703025	0.966083
LOCUS_08060		566200..566436	17.4454	-0.385105	-1.30596	0.488043	0.9999		17.4454	-0.461832	-1.37729	0.384231	0.99997		17.4454	-0.488471	-1.40296	0.319527	0.999997		18.8075	-0.113274	-1.08168	0.762635	0.920172		17.4454	-0.317862	-1.24648	0.429468	0.989854		21.2314	0.14837	1.10832	0.743345	0.991074		17.5663	-0.301781	-1.23267	0.442925	0.63075		19.4673	0.0267861	1.01874	0.947275	0.995228
LOCUS_08070		566920..567102	1.10919	0.290724	1.22325	0.766689	0.9999		0.88486	-1.77198	-3.41521	0.234876	ND		0.88486	-0.906739	-1.8748	0.471895	0.999997		0.88486	-1.14149	-2.20609	0.358826	0.704014		0.888094	-0.1105	-1.0796	0.915	ND		0.88486	-0.507444	-1.42153	0.672722	ND		1.82131	0.671471	1.5927	0.464232	0.650555		1.10604	0.170211	1.12522	0.864109	0.993691
LOCUS_08080		567295..567462	54.2113	-0.386048	-1.30681	0.529096	0.9999		54.2113	-0.280415	-1.21454	0.629612	0.99997		54.2113	-0.471088	-1.38615	0.411972	0.999997		54.2113	-0.830261	-1.77801	0.0529351	0.324839		54.2113	-0.410914	-1.32953	0.338969	0.989854		56.3219	-0.104504	-1.07512	0.82565	0.99192		54.2113	-0.706881	-1.63227	0.0814446	0.224237		54.2113	-0.249674	-1.18894	0.563675	0.960549
LOCUS_08090		568282..568692	77.27	-0.517278	-1.43125	0.263165	0.9999		77.27	-0.207709	-1.15485	0.673669	0.99997		77.27	-0.540421	-1.4544	0.214952	0.999997		77.27	-0.853608	-1.80701	0.024801	0.219814		77.27	-0.506353	-1.42046	0.182708	0.974301		77.27	-0.292379	-1.22466	0.424337	0.991074		77.27	-1.16284	-2.23898	0.0042335	0.0287615		77.27	-0.479131	-1.3939	0.16672	0.851896
LOCUS_08100		568685..568960	100.624	-0.308611	-1.23851	0.490417	0.9999		100.624	-0.226325	-1.16985	0.613369	0.99997		100.624	-0.457869	-1.37351	0.314715	0.999997		100.624	-0.845177	-1.79648	0.0140377	0.162744		100.624	-0.529012	-1.44294	0.12543	0.931229		100.624	-0.325304	-1.25293	0.387085	0.991074		100.624	-1.07787	-2.11092	0.000153703	0.00206823		100.624	-0.396723	-1.31651	0.304745	0.924738
LOCUS_08110		569204..569461	92.2621	-0.256404	-1.1945	0.60258	0.9999		92.2621	-0.0767539	-1.05464	0.861328	0.99997		92.2621	-0.249237	-1.18858	0.595497	0.999997		92.2621	-0.797786	-1.73843	0.0494539	0.312998		92.2621	-0.317788	-1.24642	0.408845	0.989854		92.2621	-0.40848	-1.32729	0.258728	0.991074		92.2621	-0.995979	-1.99443	0.00446863	0.0299069		92.2621	-0.364186	-1.28715	0.338679	0.93719
LOCUS_08120		569565..569873	93.4207	-0.288317	-1.22121	0.520744	0.9999		93.4207	-0.0170786	-1.01191	0.971419	0.99997		93.4207	-0.156821	-1.11483	0.71716	0.999997		93.4207	-0.383269	-1.30429	0.277195	0.637115		93.4207	-0.261446	-1.19868	0.500401	0.989854		93.4207	-0.166334	-1.1222	0.653211	0.991074		93.4207	-0.784202	-1.72214	0.0579577	0.181049		93.4207	-0.246925	-1.18667	0.471979	0.955457
LOCUS_08130		complement(570022..570267)	69.9264	-0.239618	-1.18068	0.645646	0.9999		69.9264	-0.358783	-1.28234	0.464539	0.99997		69.9264	-0.172297	-1.12685	0.733165	0.999997		69.9264	-0.731509	-1.66037	0.0484926	0.3113		69.9264	-0.394203	-1.31422	0.290007	0.989854		69.9264	-0.242364	-1.18293	0.534493	0.991074		69.9264	-1.10916	-2.15719	0.00443824	0.0297818		69.9264	-0.289376	-1.22211	0.483652	0.955457
LOCUS_08140		complement(570416..571621)	88.5914	-0.138575	-1.10082	0.770811	0.9999		88.5914	-0.16633	-1.1222	0.711051	0.99997		88.5914	-0.252579	-1.19133	0.564323	0.999997		88.5914	-0.786268	-1.72461	0.0475394	0.309899		88.5914	-0.479048	-1.39382	0.0808167	0.867468		88.5914	-0.42802	-1.34539	0.149467	0.991074		88.5914	-1.09181	-2.13142	0.00156777	0.0133286		88.5914	-0.320437	-1.24871	0.251662	0.903011
LOCUS_08150		complement(571947..572843)	36.6752	-0.216595	-1.16199	0.611885	0.9999		36.6752	-0.145608	-1.1062	0.775996	0.99997		36.6752	-0.229802	-1.17267	0.632655	0.999997		36.6752	-0.24021	-1.18116	0.527221	0.806433		37.5855	-0.0767187	-1.05462	0.80759	0.990545		39.4916	-0.0418379	-1.02942	0.883461	0.99192		36.6752	-0.567596	-1.48205	0.124676	0.29417		36.6832	-0.130577	-1.09473	0.725383	0.967556
LOCUS_08160		complement(573031..575076)	80.387	-0.154325	-1.1129	0.73333	0.9999		80.387	-0.123773	-1.08958	0.783961	0.99997		80.387	-0.10668	-1.07675	0.813577	0.999997		80.387	-0.568641	-1.48313	0.105038	0.436374		80.387	-0.430406	-1.34761	0.215633	0.987722		80.387	-0.310415	-1.24006	0.388805	0.991074		80.387	-0.7941	-1.734	0.0261892	0.10704		80.387	-0.379105	-1.30053	0.257131	0.909585
LOCUS_08170		complement(576178..576432)	4.45709	0.539686	1.45366	0.425384	0.9999		4.30276	0.496634	1.41092	0.465826	ND		4.49604	0.566347	1.48077	0.371906	0.999997		5.24154	0.565672	1.48008	0.305432	0.662811		7.49335	1.19166	2.28416	0.034011	0.615133		4.73139	0.493986	1.40833	0.380453	0.991074		6.0394	0.668727	1.58967	0.224709	0.422652		6.82721	1.06395	2.09065	0.0892805	0.741494
LOCUS_08180		576522..576845	10.3877	-0.920363	-1.89259	0.146892	0.9999		10.3877	-0.266242	-1.20267	0.615554	0.99997		10.3877	-0.585995	-1.50107	0.306254	0.999997		15.761	0.39637	1.31619	0.332066	0.679571		10.9112	-0.0402275	-1.02828	0.920021	0.991829		10.3877	-0.413956	-1.33233	0.33658	0.991074		14.0209	0.141513	1.10306	0.792775	0.887426		10.3877	-0.530143	-1.44407	0.308939	0.926299
LOCUS_08190		577082..577759	13.9742	0.168066	1.12355	0.77544	0.9999		20.5845	0.679985	1.60212	0.234359	0.99997		12.434	-0.451946	-1.36788	0.470564	0.999997		16.5059	0.210155	1.15681	0.613604	0.851495		17.1487	0.369038	1.29149	0.39308	0.989854		23.0284	0.748762	1.68035	0.0577346	0.991074		24.0673	0.642274	1.56079	0.102033	0.259657		18.3294	0.440575	1.35715	0.311993	0.927219
LOCUS_08200		578561..578890	3.8086	0.131165	1.09518	0.835698	0.9999		4.0629	0.230122	1.17293	0.715604	0.99997		3.43862	-0.332317	-1.25903	0.58147	0.999997		6.38126	0.664035	1.58451	0.166711	0.524073		4.18456	0.168459	1.12386	0.734612	0.990545		6.80623	0.827481	1.77458	0.131363	0.991074		6.43267	0.575448	1.49014	0.173327	0.361161		4.78236	0.340224	1.26595	0.520084	0.955457
LOCUS_08210		578993..579235	3.16123	0.0488159	1.03442	0.953029	0.9999		3.67501	0.309068	1.23891	0.675642	ND		3.00888	-0.0612537	-1.04337	0.939783	0.999997		5.66318	0.713036	1.63925	0.247945	0.617007		4.51286	0.482422	1.39709	0.440967	0.989854		4.75776	0.549389	1.46347	0.405015	0.991074		5.48106	0.555857	1.47004	0.347013	0.546062		5.9955	0.876702	1.83617	0.147268	0.834482
LOCUS_08220		579232..579543	6.62855	-0.326827	-1.25425	0.587102	0.9999		7.9491	0.250401	1.18954	0.654015	0.99997		7.8705	0.246279	1.18614	0.663989	0.999997		10.9066	0.494756	1.40908	0.210689	0.578392		9.37454	0.386842	1.30753	0.411958	0.989854		9.14103	0.324306	1.25206	0.448103	0.991074		9.99677	0.278372	1.21283	0.517778	0.694988		10.1189	0.477072	1.39192	0.257953	0.909585
LOCUS_08230		579540..579731	4.85267	-1.06088	-2.0862	0.151229	0.9999		6.35339	0.374233	1.29615	0.569563	0.99997		4.85267	-0.694295	-1.61809	0.33008	0.999997		6.75255	0.248805	1.18822	0.611831	0.851126		5.71842	0.119615	1.08644	0.832299	0.990545		7.10985	0.398284	1.31794	0.456626	0.991074		8.89018	0.543069	1.45707	0.330891	0.53077		6.95772	0.381826	1.30299	0.472637	0.955457
LOCUS_08240		579839..580222	13.0049	0.346533	1.2715	0.5432	0.9999		11.4238	0.171834	1.12649	0.757819	0.99997		10.1378	-0.0768837	-1.05474	0.88796	0.999997		16.1293	0.462318	1.37775	0.225546	0.594098		13.1175	0.260545	1.19793	0.514329	0.989854		12.6635	0.193449	1.14349	0.673095	0.991074		15.933	0.342528	1.26798	0.405838	0.598922		12.8576	0.226003	1.16959	0.591803	0.960549
LOCUS_08250		580207..580902	6.75239	-0.0522481	-1.03688	0.925576	0.9999		6.75239	-0.0165822	-1.01156	0.976143	0.99997		6.75239	-0.172378	-1.12691	0.766623	0.999997		9.42677	0.258036	1.19585	0.511669	0.797396		7.46922	0.0323636	1.02269	0.937295	0.993573		7.22064	-0.055862	-1.03948	0.89448	0.991929		15.0669	0.834139	1.78279	0.0353464	0.131294		8.25787	0.157274	1.11518	0.69412	0.965584
mtnB		580994..581515	3.72172	-0.107282	-1.0772	0.850249	0.9999		3.73128	-0.0049639	-1.00345	0.992892	0.99997		3.72172	-0.361397	-1.28467	0.559004	0.999997		7.13759	0.711105	1.63706	0.067933	0.363451		3.8122	-0.0806899	-1.05752	0.861598	0.990545		3.72172	-0.170289	-1.12528	0.7401	0.991074		11.4752	1.29543	2.4545	0.000954365	0.00911776		4.72975	0.209269	1.1561	0.642444	0.965182
LOCUS_08270		581773..582408	6.31674	-0.144674	-1.10548	0.826989	0.9999		6.4569	0.0400902	1.02818	0.946876	0.99997		6.68713	0.0815999	1.05819	0.892565	0.999997		12.9945	0.86107	1.81639	0.0572352	0.335605		9.12491	0.461121	1.37661	0.347434	0.989854		9.00968	0.411193	1.32978	0.379965	0.991074		19.3655	1.33391	2.52084	0.00350841	0.0249208		8.52674	0.343914	1.2692	0.460811	0.955457
LOCUS_08280		582405..582629	22.8785	-0.1855	-1.13721	0.755065	0.9999		23.8264	0.0516583	1.03646	0.928606	0.99997		23.806	0.0193727	1.01352	0.973122	0.999997		36.1759	0.439117	1.35577	0.266505	0.629637		26.9069	0.122008	1.08825	0.755336	0.990545		32.4631	0.354211	1.27829	0.35762	0.991074		36.8065	0.364294	1.28725	0.328059	0.52885		26.0811	0.0585061	1.04139	0.888901	0.993691
LOCUS_08290		complement(582670..582939)	49.6612	-0.274471	-1.20955	0.570503	0.9999		51.8542	0.0640196	1.04537	0.899078	0.99997		49.6612	-0.0497602	-1.03509	0.921279	0.999997		58.9545	0.0247039	1.01727	0.9454	0.982713		50.867	-0.078716	-1.05608	0.836378	0.990545		51.7254	-0.0913717	-1.06538	0.815777	0.99192		54.7204	-0.18243	-1.13479	0.644775	0.786219		54.8644	0.0110026	1.00766	0.97711	0.997777
LOCUS_08300		complement(582947..583201)	85.7623	0.0541418	1.03824	0.917433	0.9999		85.0293	0.0491367	1.03465	0.908639	0.99997		84.9087	0.051639	1.03644	0.914975	0.999997		92.9524	-0.0389121	-1.02734	0.916832	0.972097		88.0919	-0.00672119	-1.00467	0.985616	0.997059		91.7593	0.013582	1.00946	0.970188	0.997153		92.8244	-0.139045	-1.10118	0.619306	0.767654		89.2098	-0.00887529	-1.00617	0.981076	0.997777
LOCUS_08310		complement(583221..583538)	112.989	-0.119673	-1.08649	0.794603	0.9999		112.989	-0.070376	-1.04999	0.861179	0.99997		116.32	0.0525909	1.03713	0.905159	0.999997		112.989	-0.329678	-1.25673	0.398142	0.729975		112.989	-0.295357	-1.22719	0.381314	0.989854		112.989	-0.331242	-1.2581	0.279361	0.991074		114.074	-0.339245	-1.26509	0.266303	0.465763		112.989	-0.239129	-1.18028	0.511923	0.955457
LOCUS_08320		complement(583951..584673)	10.4971	-0.243704	-1.18403	0.743351	0.9999		10.4971	-0.289593	-1.2223	0.656572	0.99997		10.4971	-0.188721	-1.13975	0.790707	0.999997		14.843	0.331995	1.25875	0.461807	0.770744		12.4652	0.189939	1.14072	0.695169	0.990545		14.1968	0.351666	1.27603	0.473286	0.991074		19.9139	0.657489	1.57734	0.129892	0.302672		11.2511	0.023394	1.01635	0.961964	0.997208
LOCUS_08330		complement(584988..585341)	4.69911	0.319922	1.24826	0.646872	0.9999		4.82486	0.358628	1.28221	0.601908	0.99997		5.0834	0.433814	1.3508	0.520061	0.999997		10.8701	1.29625	2.4559	0.00443651	0.08013		5.27816	0.397668	1.31738	0.486343	0.989854		5.9593	0.541313	1.4553	0.354126	0.991074		15.0393	1.69462	3.23691	0.000111241	0.00158327		4.91651	0.277781	1.21233	0.612532	0.962755
LOCUS_08340		complement(585448..585786)	8.62665	0.027515	1.01925	0.959698	0.9999		11.0203	0.389156	1.30963	0.431673	0.99997		8.37257	-0.0928049	-1.06644	0.868463	0.999997		11.8227	0.280005	1.2142	0.497506	0.791534		8.37257	-0.171403	-1.12615	0.707873	0.990545		8.37257	-0.17951	-1.1325	0.670872	0.991074		17.6743	0.755145	1.6878	0.0487182	0.161682		8.71572	-0.0729394	-1.05186	0.866484	0.993691
LOCUS_08350		complement(585717..586619)	10.21	0.242619	1.18314	0.677369	0.9999		10.8341	0.339181	1.26504	0.546107	0.99997		8.97485	0.0721414	1.05128	0.898316	0.999997		17.0002	0.772527	1.70826	0.064603	0.355593		10.0363	0.122172	1.08837	0.76993	0.990545		11.8868	0.329367	1.25646	0.459838	0.991074		25.3428	1.24884	2.37651	0.000568843	0.00599678		10.7128	0.196866	1.14621	0.64959	0.965182
LOCUS_08360		complement(586534..587412)	11.372	0.0787737	1.05612	0.890358	0.9999		12.8007	0.256986	1.19498	0.600802	0.99997		10.6488	-0.0323779	-1.0227	0.950944	0.999997		18.0676	0.540705	1.45468	0.185759	0.546099		12.8064	0.153944	1.11261	0.711516	0.990545		11.2436	-0.0705678	-1.05013	0.87536	0.99192		23.052	0.792587	1.73218	0.0268165	0.108517		12.018	0.0428933	1.03018	0.920128	0.994151
LOCUS_08370		complement(587553..588251)	7.8962	0.214302	1.16014	0.70466	0.9999		8.88473	0.395048	1.31499	0.486394	0.99997		8.31341	0.303195	1.23387	0.565862	0.999997		10.3705	0.401869	1.32122	0.313146	0.66968		9.35928	0.363303	1.28637	0.34792	0.989854		9.31534	0.319073	1.24753	0.424002	0.991074		15.3566	0.868175	1.82535	0.025132	0.10411		9.14845	0.311138	1.24069	0.440472	0.955457
LOCUS_08380		complement(588329..588508)	1.35929	-0.0136849	-1.00953	0.988578	0.9999		1.3517	-0.948786	-1.93025	0.371117	ND		1.3517	-0.932135	-1.9081	0.406307	0.999997		1.3517	-0.779925	-1.71704	0.419151	0.745326		1.3517	-0.666489	-1.58721	0.524017	ND		1.3517	-0.67593	-1.59763	0.493854	ND		3.00323	0.799269	1.74022	0.260718	0.460733		1.57385	0.079691	1.05679	0.921597	0.994151
LOCUS_08390		complement(588679..588903)	1.45194	0.958372	1.94312	0.353095	0.9999		0.717853	-1.77212	-3.41555	0.25013	ND		0.72897	0.0114373	1.00796	0.991884	0.999997		1.80151	1.04633	2.06527	0.22207	0.589957		1.44463	0.846513	1.79815	0.365911	ND		1.29273	0.650873	1.57012	0.508327	ND		2.77533	1.5579	2.94426	0.0516448	0.167824		1.43883	0.822158	1.76805	0.375591	0.947589
LOCUS_08400		complement(589413..589781)	8.02715	-0.0680567	-1.0483	0.908766	0.9999		8.02715	-0.521247	-1.4352	0.383852	0.99997		8.42637	0.0844463	1.06028	0.886049	0.999997		9.21742	0.00842059	1.00585	0.984777	0.995198		10.3503	0.284192	1.21773	0.501724	0.989854		8.33497	-0.053203	-1.03757	0.907274	0.991929		9.81331	0.00180964	1.00126	0.996442	0.997321		9.65452	0.177794	1.13115	0.724093	0.966951
LOCUS_08410		complement(589835..590194)	5.30044	0.0806005	1.05746	0.887263	0.9999		4.95243	-0.0376317	-1.02643	0.946049	0.99997		5.91119	0.251953	1.19082	0.661287	0.999997		8.32266	0.523518	1.43746	0.216452	0.585711		7.11285	0.406298	1.32528	0.339778	0.989854		7.37666	0.420849	1.33871	0.321277	0.991074		9.71522	0.648869	1.56794	0.159268	0.343703		7.75929	0.516733	1.43071	0.268106	0.917771
sgcE		complement(590276..590842)	8.88954	0.349184	1.27384	0.535536	0.9999		7.51431	0.118172	1.08536	0.831983	0.99997		6.85695	-0.0128566	-1.00895	0.981278	0.999997		11.0019	0.455509	1.37127	0.215651	0.584868		11.6045	0.628153	1.54558	0.128506	0.93128		7.97822	0.052391	1.03698	0.90308	0.991929		13.5768	0.659037	1.57903	0.108072	0.268966		10.4949	0.459848	1.3754	0.295204	0.920983
sgcA		complement(590854..591285)	7.90227	0.0561105	1.03966	0.918033	0.9999		7.49769	-0.117323	-1.08472	0.815967	0.99997		7.49769	-0.328974	-1.25612	0.573063	0.999997		11.4376	0.383418	1.30443	0.293544	0.650994		7.70738	-0.0748734	-1.05327	0.85384	0.990545		8.73108	0.0672489	1.04772	0.858664	0.99192		9.24628	-0.0221645	-1.01548	0.948381	0.97452		7.86995	-0.0646843	-1.04586	0.883012	0.993691
sgcQ		complement(591373..592221)	27.4284	0.112359	1.08099	0.836466	0.9999		26.9686	0.114526	1.08262	0.827791	0.99997		25.4336	0.0272348	1.01906	0.961768	0.999997		39.1032	0.477534	1.39236	0.259072	0.626238		41.7233	0.687403	1.61038	0.107783	0.926784		41.4704	0.645347	1.56412	0.128524	0.991074		44.2162	0.558793	1.47304	0.168269	0.354921		44.2404	0.74873	1.68031	0.0658575	0.665063
LOCUS_08450		complement(592234..592473)	6.58661	0.190784	1.14138	0.786757	0.9999		5.92765	0.0553852	1.03914	0.93577	0.99997		5.75047	-0.333509	-1.26007	0.652445	0.999997		9.78916	0.555072	1.46924	0.249381	0.618192		7.7842	0.343991	1.26926	0.527921	0.989854		10.2074	0.697116	1.62126	0.177941	0.991074		11.4477	0.697656	1.62187	0.150528	0.331358		9.94992	0.667043	1.58782	0.205817	0.876281
LOCUS_08460		complement(592548..593081)	4.02371	-0.417921	-1.336	0.475835	0.9999		4.7175	0.220551	1.16518	0.679351	0.99997		4.13274	-0.0178167	-1.01243	0.977133	0.999997		5.9142	0.332577	1.25926	0.393612	0.7262		5.40093	0.311293	1.24082	0.504012	0.989854		5.77523	0.39702	1.31679	0.401469	0.991074		5.92096	0.234662	1.17663	0.582971	0.740018		4.3966	-0.00412426	-1.00286	0.992821	0.997777
LOCUS_08470		complement(593084..593410)	3.59964	-0.106084	-1.0763	0.875666	0.9999		3.59964	-0.670397	-1.59151	0.332305	ND		3.59964	-0.325448	-1.25305	0.635505	0.999997		4.21255	0.0155749	1.01085	0.977682	0.992227		3.59964	-0.4885	-1.40299	0.407817	0.989854		3.59964	-0.135487	-1.09846	0.811475	0.99192		3.59964	-0.420114	-1.33803	0.455581	0.6425		3.59964	-0.330884	-1.25778	0.562516	0.960549
sgcB		complement(593556..593834)	2.46741	-0.913342	-1.8834	0.23131	0.9999		2.46741	-0.280558	-1.21466	0.696067	ND		2.46741	-1.05262	-2.07429	0.198228	0.999997		3.04552	0.0773153	1.05505	0.897194	0.969396		2.77117	0.0509211	1.03593	0.934263	0.993526		2.46741	-0.734815	-1.66418	0.256084	0.991074		2.53333	-0.284438	-1.21794	0.613918	0.764074		2.46741	-0.220636	-1.16525	0.71034	0.966083
sgcX		complement(593831..594952)	7.30113	-0.117429	-1.0848	0.854253	0.9999		7.30113	-0.070625	-1.05017	0.906614	0.99997		8.31393	0.19243	1.14269	0.733466	0.999997		10.036	0.26171	1.1989	0.515743	0.799244		8.72146	0.169947	1.12502	0.700705	0.990545		8.32838	0.0724705	1.05152	0.87524	0.99192		11.2021	0.322616	1.2506	0.399693	0.593589		9.01784	0.198321	1.14736	0.659708	0.965182
LOCUS_08500		complement(595398..595610)	13.3099	-0.189284	-1.1402	0.728068	0.9999		13.3099	-0.300677	-1.23172	0.592567	0.99997		13.3099	-0.414179	-1.33254	0.464043	0.999997		13.3099	-0.543983	-1.45799	0.170063	0.527219		13.3099	-0.712555	-1.6387	0.119367	0.927511		13.3099	-0.601405	-1.51719	0.14626	0.991074		13.3099	-0.604762	-1.52073	0.123492	0.292305		13.3099	-0.507322	-1.42141	0.228709	0.899962
LOCUS_08510		complement(595737..596285)	18.733	-0.0131542	-1.00916	0.979804	0.9999		18.6607	-0.132701	-1.09634	0.782471	0.99997		19.1745	0.0598293	1.04234	0.901722	0.999997		18.6607	-0.822637	-1.76864	0.0538882	0.326579		18.6607	-0.726603	-1.65474	0.0737802	0.840613		18.6607	-0.815139	-1.75947	0.0439729	0.947433		18.6607	-0.788334	-1.72708	0.0484267	0.160927		18.6607	-0.813537	-1.75752	0.0735238	0.689273
LOCUS_08520		complement(596282..596482)	10.2809	-0.224913	-1.16871	0.691602	0.9999		10.2809	-0.248805	-1.18822	0.664446	0.99997		10.8008	0.0688725	1.0489	0.898478	0.999997		10.2809	-0.467903	-1.3831	0.259714	0.626332		10.2809	-0.777725	-1.71442	0.134973	0.939933		10.2809	-0.741625	-1.67206	0.157754	0.991074		10.2809	-0.596948	-1.51251	0.131198	0.304138		10.2809	-0.674063	-1.59556	0.171543	0.855201
LOCUS_08530		complement(596533..596754)	10.9598	-0.24261	-1.18313	0.673853	0.9999		10.9598	-0.155483	-1.11379	0.771945	0.99997		10.9598	-0.111442	-1.08031	0.843654	0.999997		10.9598	-0.345035	-1.27018	0.438806	0.755574		10.9598	-0.521374	-1.43532	0.23372	0.989854		10.9598	-0.734829	-1.6642	0.125987	0.991074		10.9598	-0.434327	-1.35128	0.300913	0.50298		10.9598	-0.248605	-1.18806	0.59035	0.960549
LOCUS_08540		complement(596784..597083)	9.05962	-0.535715	-1.44966	0.379123	0.9999		9.19857	0.0452105	1.03183	0.936257	0.99997		9.05962	-0.452036	-1.36797	0.445308	0.999997		9.05962	-0.906321	-1.87426	0.0472548	0.309132		9.05962	-0.693352	-1.61704	0.127538	0.931229		9.05962	-0.783361	-1.72114	0.107842	0.991074		9.05962	-0.655823	-1.57551	0.134553	0.308733		9.05962	-0.227741	-1.171	0.60501	0.962359
LOCUS_08550		complement(597123..597350)	11.7403	-0.270144	-1.20593	0.627436	0.9999		11.7403	-0.352641	-1.2769	0.533186	0.99997		11.7403	-0.531605	-1.44554	0.355935	0.999997		11.7403	-0.316141	-1.245	0.468085	0.774565		14.0993	0.201914	1.15022	0.684183	0.990545		11.7403	-0.421268	-1.3391	0.32183	0.991074		12.2246	-0.256844	-1.19486	0.568062	0.730311		13.4959	0.104433	1.07507	0.835619	0.991534
LOCUS_08560		complement(597705..598577)	8.82125	0.186684	1.13814	0.781709	0.9999		8.80053	0.203904	1.15181	0.742185	0.99997		8.57236	0.150252	1.10976	0.823165	0.999997		12.1493	0.479087	1.39386	0.314423	0.670067		8.27979	0.0389979	1.0274	0.934905	0.993526		14.8103	0.840677	1.79089	0.0813452	0.991074		10.0108	0.103558	1.07442	0.815716	0.901593		11.7287	0.520355	1.43431	0.279194	0.920983
LOCUS_08570		complement(598814..599137)	4.98381	-0.126045	-1.0913	0.863048	0.9999		4.98381	-7.42218	-171.513	0.0126773	ND		7.70718	0.552233	1.46635	0.391238	0.999997		4.98381	-0.617288	-1.53399	0.332043	0.679571		4.98381	-0.294126	-1.22614	0.652378	0.990545		8.30655	0.48703	1.40156	0.380912	0.991074		9.10146	0.446532	1.36276	0.523487	0.698875		8.9961	0.63095	1.54858	0.269958	0.917771
LOCUS_08580		599190..599930	2.9557	-0.379164	-1.30059	0.518953	0.9999		2.9557	-0.56219	-1.47651	0.39119	0.99997		2.9557	-0.186777	-1.13822	0.749561	0.999997		3.38523	-0.00657584	-1.00457	0.989128	0.99626		3.01521	-0.0820268	-1.0585	0.852116	0.990545		3.97492	0.277004	1.21168	0.49953	0.991074		4.49241	0.28197	1.21585	0.528245	0.700915		3.2229	-0.00605682	-1.00421	0.989444	0.997777
LOCUS_08590		599888..600232	7.63608	-0.400358	-1.31984	0.495748	0.9999		8.36735	0.113712	1.08201	0.841896	0.99997		7.63608	-0.401844	-1.3212	0.485898	0.999997		8.33972	-0.0956179	-1.06852	0.803957	0.936768		7.63608	-0.24807	-1.18762	0.590924	0.990494		10.4519	0.302289	1.2331	0.452718	0.991074		13.1386	0.464633	1.37997	0.221511	0.419165		8.56485	0.0331467	1.02324	0.937314	0.995228
LOCUS_08600		complement(602057..602362)	8.59043	-0.491522	-1.40593	0.408919	0.9999		8.59043	-0.0805091	-1.05739	0.892857	0.99997		8.59043	-0.152329	-1.11136	0.797559	0.999997		9.26892	-0.135447	-1.09843	0.745622	0.914962		8.59043	-0.98713	-1.98224	0.0477466	0.72236		8.59043	-0.530476	-1.44441	0.255389	0.991074		15.0914	0.474332	1.38927	0.208365	0.403684		8.59043	-0.475185	-1.3901	0.310246	0.926774
LOCUS_08610		complement(602308..602691)	5.39097	0.345314	1.27043	0.59337	0.9999		3.99747	-0.3452	-1.27033	0.611355	0.99997		4.37033	0.0748832	1.05328	0.909794	0.999997		5.06265	0.0604615	1.0428	0.907331	0.970415		4.86922	0.105877	1.07615	0.855235	0.990545		5.0644	0.120887	1.0874	0.836265	0.99192		9.32078	0.839718	1.7897	0.0790966	0.219741		5.16531	0.178162	1.13144	0.74761	0.969825
LOCUS_08620		complement(602754..602954)	5.67155	0.181203	1.13383	0.802587	0.9999		4.84509	-0.0440584	-1.03101	0.949135	0.99997		4.8214	-0.495441	-1.40975	0.513602	0.999997		6.85594	0.223455	1.16753	0.710307	0.897522		5.05287	-0.114075	-1.08228	0.860034	0.990545		4.8214	-0.66939	-1.5904	0.339812	0.991074		7.863	0.319859	1.24821	0.606702	0.758427		7.24738	0.380143	1.30147	0.562725	0.960549
nanC		complement(602974..603690)	1.97213	0.70477	1.62989	0.360579	0.9999		1.13094	-0.0782179	-1.05571	0.913669	ND		1.19844	0.0817687	1.05831	0.901627	0.999997		4.01057	1.59191	3.01447	0.000835588	0.0223748		1.13094	-0.259308	-1.1969	0.651838	0.990545		1.96685	0.640771	1.55916	0.198038	0.991074		6.27038	2.13752	4.40005	1.7422e-05	0.000325566		1.91913	0.624066	1.54121	0.249445	0.902609
LOCUS_08640		complement(605609..606064)	17.2454	-0.0995387	-1.07143	0.872268	0.9999		17.2454	-0.0947501	-1.06788	0.871038	0.99997		17.2454	-0.100372	-1.07205	0.866091	0.999997		37.0368	0.881652	1.84248	0.041921	0.29087		21.919	0.235022	1.17692	0.573046	0.990494		20.4001	0.104851	1.07538	0.80591	0.99192		70.0695	1.70181	3.25309	1.32576e-06	3.53059e-05		17.2454	-0.159756	-1.1171	0.723188	0.966563
LOCUS_08650		complement(606108..606578)	18.8418	-0.0526139	-1.03714	0.927277	0.9999		18.8418	-0.0853639	-1.06096	0.880287	0.99997		19.7259	0.0649284	1.04603	0.906841	0.999997		42.4015	0.948093	1.92932	0.00800546	0.120873		19.2316	-0.0822866	-1.05869	0.842966	0.990545		22.1695	0.0860062	1.06143	0.847941	0.99192		63.0791	1.42136	2.67838	7.68505e-05	0.00114945		18.8418	-0.271049	-1.20668	0.530525	0.956607
LOCUS_08660		complement(606757..607113)	21.6862	0.218559	1.16357	0.739262	0.9999		22.318	0.279003	1.21336	0.635397	0.99997		25.1969	0.428994	1.34629	0.487921	0.999997		46.7383	1.13961	2.20321	0.0105257	0.139369		27.1922	0.472099	1.38713	0.278441	0.989854		33.8991	0.748699	1.68028	0.117137	0.991074		74.366	1.70712	3.26509	8.69796e-06	0.00018114		29.2481	0.562463	1.47679	0.213581	0.887421
fimE		608092..608688	308.824	0.229026	1.17204	0.788809	0.9999		258.464	-0.0595235	-1.04212	0.943794	0.99997		285.218	0.124746	1.09032	0.8879	0.999997		439.677	0.666422	1.58713	0.296771	0.654158		445.449	0.801248	1.74261	0.209236	0.987722		585.916	1.17449	2.25714	0.0718888	0.991074		512.527	0.793942	1.73381	0.233587	0.432662		465.148	0.838644	1.78837	0.198534	0.871339
LOCUS_08680		609163..609333	4.9879	0.205674	1.15323	0.767762	0.9999		7.59822	0.816601	1.76125	0.217001	0.99997		6.46859	0.591367	1.50667	0.360648	0.999997		4.7408	-0.0731207	-1.05199	0.900145	0.970228		4.51525	-0.0324987	-1.02278	0.953357	0.994757		5.09065	0.101834	1.07314	0.862199	0.99192		5.59326	0.0652005	1.04623	0.905816	0.950983		5.44344	0.215073	1.16076	0.697775	0.965584
LOCUS_08690		609531..609710	6.32942	0.206877	1.15419	0.742853	0.9999		7.67127	0.493192	1.40756	0.438464	0.99997		7.95979	0.552056	1.46617	0.374245	0.999997		10.8153	0.780237	1.71741	0.163277	0.521848		10.6156	0.853085	1.80636	0.101477	0.917197		6.46366	0.102755	1.07382	0.832382	0.99192		12.7166	0.903993	1.87124	0.0359291	0.13266		12.1424	1.02737	2.03831	0.0390711	0.542421
LOCUS_08700		609817..610119	2.53782	-0.350974	-1.27542	0.637647	0.9999		2.53782	-0.0822215	-1.05865	0.908192	ND		3.37646	0.403212	1.32245	0.512121	0.999997		4.67857	0.649171	1.56827	0.211997	0.579692		3.62182	0.39158	1.31183	0.48867	0.989854		3.00811	0.0907887	1.06495	0.875885	0.99192		5.90588	0.883428	1.84475	0.11026	0.272459		4.00781	0.517476	1.43145	0.333686	0.936251
LOCUS_08710		610350..610712	1.00916	0.151155	1.11046	0.847648	0.9999		1.79014	0.972745	1.96257	0.20717	ND		1.23854	0.458846	1.37444	0.581696	0.999997		1.78245	0.750481	1.68235	0.311371	0.668094		1.12074	0.203263	1.1513	0.804135	0.990545		1.71826	0.767974	1.70288	0.281138	0.991074		3.09513	1.43917	2.71165	0.0203283	0.0894984		1.78316	0.833917	1.78252	0.303759	0.924605
LOCUS_08720		610709..611056	0.928917	1.78302	3.44146	0.153049	0.9999		0.816009	1.68228	3.20935	0.160753	ND		0.824636	1.70181	3.25308	0.180346	0.999997		1.39601	2.22078	4.66146	0.0355063	0.268676		1.6338	2.55218	5.86519	0.0212884	0.476737		1.55696	2.43594	5.41117	0.031894	ND		2.51053	2.95326	7.74497	0.00396326	0.0273386		1.74434	2.62595	6.1729	0.0144701	0.32359
LOCUS_08730		611261..612175	0.840842	-0.552912	-1.46704	0.424435	0.9999		0.88802	0.0678495	1.04815	0.920098	ND		0.840842	-0.640109	-1.55845	0.364641	0.999997		2.39027	1.27133	2.41383	0.0138139	0.161872		1.15624	0.342358	1.26783	0.588525	0.990494		0.862994	-0.117906	-1.08516	0.841894	0.99192		3.91143	1.87946	3.67938	6.45932e-05	0.00100752		1.28244	0.467467	1.38268	0.406221	0.948039
LOCUS_08740		612166..612918	1.66578	-0.160334	-1.11755	0.796892	0.9999		1.66578	-0.56154	-1.47584	0.385483	0.99997		1.66578	-0.186139	-1.13771	0.761001	0.999997		2.79406	0.501555	1.41574	0.332743	0.679571		1.66578	-0.307834	-1.23785	0.552216	0.989854		1.92859	0.0556267	1.03931	0.917335	0.994319		6.35437	1.59832	3.0279	0.000375026	0.00436275		2.47289	0.430792	1.34797	0.396966	0.948039
LOCUS_08750		612912..613148	1.37265	1.33004	2.5141	0.17958	0.9999		2.39638	2.12727	4.36889	0.0306116	ND		0.516825	0.0109333	1.00761	0.99304	0.999997		1.53767	1.28536	2.43743	0.173896	0.532148		1.3737	1.23373	2.35174	0.239486	ND		0.695626	0.26657	1.20294	0.811532	ND		4.39043	2.67244	6.37505	0.00224891	0.017942		1.36624	1.20939	2.3124	0.214253	0.887421
LOCUS_08760		613342..613770	1.891	0.217071	1.16237	0.763534	0.9999		2.36997	0.544261	1.45827	0.443847	ND		1.71584	0.0930207	1.0666	0.895746	0.999997		5.75814	1.6048	3.04153	0.00226759	0.0494781		2.46244	0.496192	1.41049	0.387151	0.989854		2.8932	0.692477	1.61606	0.214178	0.991074		11.1469	2.45731	5.49192	4.08201e-06	9.57017e-05		2.07563	0.232896	1.17519	0.674611	0.965182
LOCUS_08770		614357..614821	4.52978	0.971355	1.96068	0.161131	0.9999		2.8841	0.348708	1.27342	0.608306	0.99997		2.90409	0.361254	1.28454	0.587757	0.999997		5.39975	1.02325	2.03249	0.0407161	0.286438		3.58218	0.543464	1.45747	0.318085	0.989854		4.46443	0.820241	1.7657	0.13201	0.991074		7.69343	1.43299	2.70005	0.00319655	0.0233122		3.65526	0.569926	1.48445	0.327245	0.933853
fimH		614841..615743	4.1271	0.328493	1.2557	0.587076	0.9999		3.69496	0.176227	1.12993	0.771479	0.99997		4.5285	0.474644	1.38958	0.383757	0.999997		6.68072	0.849956	1.80245	0.0350658	0.266305		6.29927	0.870365	1.82813	0.0421885	0.686949		5.46659	0.631952	1.54966	0.139143	0.991074		9.3094	1.22564	2.33859	0.00439618	0.0295255		5.87145	0.752191	1.68435	0.0679386	0.673357
gntP		complement(615992..617257)	5.73742	0.0172503	1.01203	0.978173	0.9999		5.6003	-0.216033	-1.16154	0.697106	0.99997		5.6003	-0.17228	-1.12684	0.776268	0.999997		6.65516	0.0262701	1.01838	0.950085	0.983365		5.6003	-0.125916	-1.0912	0.770554	0.990545		5.6003	-0.166804	-1.12257	0.664177	0.991074		7.1011	0.0200071	1.01396	0.961153	0.980787		5.6003	-0.434868	-1.35179	0.277366	0.920983
uxuA		617597..618781	32.518	0.401529	1.32091	0.376303	0.9999		24.6704	0.0211392	1.01476	0.967041	0.99997		24.1657	-0.0338264	-1.02372	0.945961	0.999997		24.1657	-0.430398	-1.34761	0.290975	0.648876		24.1657	-0.547355	-1.4614	0.187839	0.979435		24.1657	-0.544812	-1.45883	0.184854	0.991074		24.1657	-0.499898	-1.41411	0.246835	0.446729		24.1657	-0.355012	-1.279	0.411886	0.948039
LOCUS_08810		618862..619134	26.9571	0.472169	1.38719	0.440103	0.9999		18.809	-0.133462	-1.09692	0.823225	0.99997		18.809	-0.393197	-1.3133	0.517142	0.999997		18.809	-0.36848	-1.29099	0.365372	0.70861		18.809	-0.444196	-1.36056	0.315865	0.989854		19.0936	-0.185199	-1.13697	0.695336	0.991074		18.809	-0.58592	-1.501	0.136989	0.31282		18.809	-0.424589	-1.34219	0.378912	0.947972
LOCUS_08820		619101..619301	28.3373	0.567661	1.48212	0.326331	0.9999		18.9279	-0.215733	-1.16129	0.668168	0.99997		18.9279	-0.299395	-1.23063	0.556323	0.999997		18.9279	-0.776999	-1.71356	0.0567621	0.334358		18.9279	-0.238744	-1.17997	0.565976	0.990494		18.9279	-0.542688	-1.45668	0.174419	0.991074		18.9279	-0.429808	-1.34705	0.229621	0.428127		18.9279	-0.441554	-1.35807	0.328869	0.935003
LOCUS_08830		619403..620320	28.4477	0.379366	1.30077	0.432463	0.9999		22.6268	0.0584797	1.04137	0.905468	0.99997		21.4609	-0.0344086	-1.02414	0.946074	0.999997		21.5806	-0.248864	-1.18827	0.550202	0.817332		21.4609	-0.567165	-1.48161	0.15122	0.949704		21.4609	-0.219227	-1.16411	0.546863	0.991074		23.8023	-0.209204	-1.15605	0.524368	0.698875		21.4609	-0.306869	-1.23702	0.431044	0.951393
LOCUS_08840		620827..621306	57.3618	0.0541693	1.03826	0.90584	0.9999		56.172	0.0350227	1.02457	0.933046	0.99997		57.5607	0.075893	1.05401	0.863124	0.999997		61.4394	-0.0507349	-1.03579	0.880203	0.963555		63.3972	0.103081	1.07407	0.786289	0.990545		57.5673	-0.0739514	-1.0526	0.838836	0.99192		60.4972	-0.172429	-1.12695	0.683491	0.815092		55.8217	-0.0991795	-1.07116	0.788976	0.981717
LOCUS_08850		complement(621543..621836)	1.65936	-0.959043	-1.94402	0.345098	0.9999		1.65936	-0.126782	-1.09186	0.905324	ND		1.65936	-0.586797	-1.50191	0.569837	0.999997		3.16936	0.726791	1.65495	0.298651	0.655848		2.62621	0.579121	1.49394	0.411451	0.989854		3.37523	0.908268	1.87679	0.189832	0.991074		3.39585	0.72452	1.65235	0.249839	0.450253		2.34006	0.405081	1.32416	0.577916	0.960549
LOCUS_08860		complement(621863..622120)	0.63046	0.373048	1.29509	0.734786	0.9999		0.472675	-0.00574693	-1.00399	0.995972	ND		0.475664	0.0111028	1.00773	0.992501	0.999997		0.94202	0.719727	1.64687	0.471858	0.776269		1.41784	1.39876	2.63674	0.156024	ND		0.471524	-1.50225	-2.83283	0.323658	ND		0.646771	0.104094	1.07482	0.932453	0.965551		0.784753	0.557287	1.4715	0.622239	0.963966
LOCUS_08870		623039..623290	32.0296	-0.541384	-1.45537	0.407328	0.9999		32.0296	-0.472915	-1.38791	0.45216	0.99997		32.0296	-0.0131418	-1.00915	0.982449	0.999997		32.0296	-0.570748	-1.48529	0.180956	0.54114		33.0654	-0.0258469	-1.01808	0.95344	0.994757		32.0296	-0.529245	-1.44317	0.199431	0.991074		32.0296	-0.736061	-1.66562	0.0689911	0.202651		32.0296	-0.389908	-1.31031	0.393873	0.948039
LOCUS_08880		complement(623283..623507)	19.8623	0.122516	1.08863	0.835712	0.9999		23.687	0.340188	1.26592	0.589606	0.99997		25.267	0.445231	1.36153	0.458172	0.999997		22.5044	0.0947406	1.06787	0.817172	0.942075		30.5138	0.642336	1.56085	0.141832	0.948263		25.7849	0.362749	1.28587	0.446789	0.991074		19.4196	-0.216923	-1.16225	0.604826	0.756453		24.6426	0.315028	1.24404	0.490279	0.955457
LOCUS_08890		complement(623599..624192)	41.8429	-0.0889759	-1.06361	0.842431	0.9999		41.8429	-0.0171698	-1.01197	0.970715	0.99997		46.5533	0.145541	1.10615	0.750714	0.999997		51.058	0.0907477	1.06492	0.802763	0.936638		49.4512	0.156459	1.11455	0.673762	0.990545		51.4263	0.17874	1.13189	0.641529	0.991074		50.9928	-0.00908008	-1.00631	0.983398	0.992095		53.9627	0.261711	1.1989	0.47467	0.955457
LOCUS_08900		complement(624257..624769)	107.335	0.00347614	1.00241	0.99386	0.9999		108.565	0.00865767	1.00602	0.986899	0.99997		106.771	-0.0614192	-1.04349	0.905872	0.999997		106.771	-0.569987	-1.48451	0.114702	0.450552		106.771	-0.348902	-1.27359	0.31029	0.989854		106.771	-0.449095	-1.36518	0.247041	0.991074		106.771	-0.727151	-1.65537	0.0477108	0.159726		106.771	-0.331888	-1.25866	0.314511	0.927219
LOCUS_08910		complement(624954..625427)	123.766	-0.0615042	-1.04355	0.904291	0.9999		123.766	-0.0274096	-1.01918	0.957583	0.99997		123.766	-0.058939	-1.0417	0.910012	0.999997		123.766	-0.610806	-1.52711	0.077942	0.392277		123.766	-0.35457	-1.2786	0.338636	0.989854		123.766	-0.485665	-1.40023	0.158506	0.991074		123.766	-0.850545	-1.80318	0.0260347	0.106821		123.766	-0.290532	-1.22309	0.41329	0.948039
LOCUS_08920		complement(625440..625673)	8.83277	-0.292436	-1.22471	0.607462	0.9999		8.83277	-0.249116	-1.18848	0.654691	0.99997		8.83277	-0.0443488	-1.03122	0.935931	0.999997		9.52604	-0.114306	-1.08245	0.791978	0.93251		8.83277	-0.137289	-1.09984	0.771163	0.990545		8.83277	-0.395488	-1.31539	0.397631	0.991074		14.2297	0.363391	1.28645	0.407682	0.600831		11.2439	0.214533	1.16033	0.627334	0.964103
LOCUS_08930		complement(625682..625900)	2.77744	0.302075	1.23292	0.689024	0.9999		5.19939	1.19712	2.29281	0.116612	ND		2.61542	0.230368	1.17313	0.761494	0.999997		5.73077	1.12798	2.18553	0.0771586	0.38946		2.59737	0.108832	1.07836	0.868999	0.990545		6.06062	1.27899	2.42668	0.0388393	0.931229		7.03317	1.3205	2.49753	0.0277919	0.111211		5.913	1.26242	2.39898	0.0365815	0.529344
LOCUS_08940		complement(625897..626244)	4.07115	0.0590367	1.04177	0.933243	0.9999		3.84892	-0.702492	-1.62731	0.320609	0.99997		5.05372	0.395482	1.31538	0.551548	0.999997		6.97618	0.664624	1.58515	0.200328	0.564362		6.1838	0.590933	1.50622	0.284184	0.989854		5.73605	0.459087	1.37467	0.424262	0.991074		5.74343	0.289537	1.22225	0.549941	0.71597		6.04654	0.551433	1.46554	0.331015	0.936251
LOCUS_08950		626825..627169	10.6881	-0.251447	-1.1904	0.646976	0.9999		10.6881	-0.245026	-1.18511	0.587569	0.99997		10.9108	0.0275065	1.01925	0.958684	0.999997		11.6233	-0.101497	-1.07289	0.792403	0.93251		13.5476	0.228199	1.17137	0.553676	0.989854		11.7698	-0.0103794	-1.00722	0.978776	0.997314		13.5076	0.0154158	1.01074	0.966014	0.98284		12.0828	0.0443653	1.03123	0.907716	0.994151
LOCUS_08960		complement(627389..627727)	11.4813	0.168685	1.12403	0.753424	0.9999		10.0432	-0.119646	-1.08647	0.816032	0.99997		10.3792	0.0458225	1.03227	0.925829	0.999997		15.2914	0.383655	1.30464	0.297403	0.654423		11.741	0.11296	1.08144	0.778516	0.990545		13.3503	0.258613	1.19633	0.513291	0.991074		13.8755	0.14612	1.10659	0.710145	0.83538		12.5373	0.187601	1.13887	0.643474	0.965182
LOCUS_08970		complement(627736..627939)	5.1559	0.317503	1.24617	0.714821	0.9999		4.18651	0.0770296	1.05484	0.92642	ND		5.00931	0.289187	1.22195	0.730209	0.999997		5.55315	0.283679	1.2173	0.704142	0.895116		4.37398	0.0592939	1.04196	0.941478	0.99361		5.68784	0.400972	1.3204	0.549526	0.991074		6.73128	0.463423	1.37881	0.508736	0.688677		6.74519	0.655044	1.57466	0.341828	0.937303
LOCUS_08980		complement(627939..628565)	5.42933	0.0146524	1.01021	0.979739	0.9999		5.30487	-0.11646	-1.08407	0.835634	0.99997		5.30487	-0.497635	-1.4119	0.427949	0.999997		8.07015	0.405359	1.32442	0.334653	0.680892		6.99978	0.305991	1.23627	0.455445	0.989854		7.66697	0.394514	1.3145	0.344442	0.991074		9.69353	0.57418	1.48883	0.145547	0.325163		6.71332	0.223622	1.16766	0.601978	0.962359
LOCUS_08990		complement(628601..628834)	7.27245	0.665344	1.58595	0.325331	0.9999		4.87055	0.0908391	1.06499	0.902231	0.99997		5.41799	0.261846	1.19901	0.692567	0.999997		10.2035	0.965752	1.95308	0.0614791	0.349739		5.73048	0.232276	1.17469	0.662161	0.990545		7.80811	0.636606	1.55467	0.25206	0.991074		8.53503	0.594808	1.51027	0.23846	0.437798		7.6088	0.639137	1.5574	0.253533	0.904648
LOCUS_09000		complement(629066..629236)	4.02066	0.563494	1.47784	0.46636	0.9999		5.23458	0.95159	1.934	0.222073	ND		2.86794	0.133324	1.09682	0.867981	0.999997		6.15894	0.998831	1.99838	0.0996431	0.429618		5.69943	0.998086	1.99735	0.101472	0.917197		5.08454	0.799204	1.74014	0.206713	0.991074		4.86266	0.563353	1.4777	0.362736	0.561213		8.28521	1.51315	2.85432	0.0110413	0.280409
LOCUS_09010		complement(629552..629809)	10.8715	0.341514	1.26709	0.561098	0.9999		8.81085	-0.0174933	-1.0122	0.977726	0.99997		10.9376	0.319213	1.24765	0.619839	0.999997		10.9923	0.142835	1.10407	0.758188	0.918579		12.5996	0.449136	1.36522	0.370791	0.989854		10.5862	0.161205	1.11822	0.724771	0.991074		15.6413	0.547342	1.46139	0.210783	0.40631		10.9813	0.228786	1.17185	0.633404	0.964239
yjiL		complement(629806..630573)	9.31364	0.0658722	1.04672	0.91991	0.9999		9.15263	0.0333818	1.02341	0.955276	0.99997		8.97651	-0.058735	-1.04155	0.925827	0.999997		12.6044	0.287754	1.22074	0.5093	0.797396		9.73195	0.0247456	1.0173	0.955873	0.994906		10.7658	0.143829	1.10483	0.730909	0.991074		11.977	0.119276	1.08619	0.77971	0.881036		11.8039	0.286744	1.21988	0.52701	0.955982
LOCUS_09030		complement(630583..631431)	17.321	0.108758	1.0783	0.837083	0.9999		16.2605	0.0273663	1.01915	0.958504	0.99997		16.1419	-0.0709756	-1.05043	0.890333	0.999997		20.2787	0.130889	1.09497	0.721829	0.902561		17.7079	0.045194	1.03182	0.90989	0.990767		17.1411	-0.0402979	-1.02833	0.91877	0.994458		20.8743	0.0727392	1.05171	0.847663	0.921577		17.8308	0.0361539	1.02538	0.931697	0.994342
LOCUS_09040		complement(631494..631733)	22.9297	-0.165213	-1.12133	0.771871	0.9999		23.5031	0.0215826	1.01507	0.969935	0.99997		23.5401	0.0292784	1.0205	0.957868	0.999997		22.9297	-0.331803	-1.25859	0.398759	0.730438		25.0575	-0.000180968	-1.00013	0.999646	0.999744		22.9297	-0.297923	-1.22937	0.47079	0.991074		26.0097	-0.1523	-1.11134	0.711209	0.835502		23.1052	-0.13292	-1.09651	0.751127	0.970924
LOCUS_09050		complement(631974..632252)	14.2359	-0.27768	-1.21224	0.607247	0.9999		14.2359	-0.175586	-1.12942	0.720188	0.99997		14.2359	-0.341377	-1.26697	0.511594	0.999997		20.3173	0.290799	1.22332	0.460347	0.770294		16.0172	0.0576219	1.04075	0.874605	0.990545		17.5574	0.151058	1.11038	0.73017	0.991074		21.3218	0.260911	1.19824	0.50799	0.687911		15.5212	-0.00712959	-1.00495	0.98512	0.997777
LOCUS_09060		complement(632259..633125)	9.33944	-0.197966	-1.14708	0.743484	0.9999		9.88424	0.0706931	1.05022	0.902102	0.99997		9.33944	-0.0948347	-1.06794	0.868701	0.999997		10.3267	-0.0804478	-1.05735	0.850705	0.952568		9.33944	-0.180044	-1.13292	0.685593	0.990545		10.3238	-0.00814929	-1.00566	0.98471	0.997314		13.0528	0.157983	1.11573	0.675766	0.809796		10.3166	0.00821514	1.00571	0.98488	0.997777
LOCUS_09070		complement(633165..633872)	6.41156	-0.104563	-1.07517	0.85167	0.9999		6.6556	0.046049	1.03243	0.935364	0.99997		7.3361	0.169006	1.12428	0.76813	0.999997		8.97959	0.263906	1.20073	0.493712	0.789726		6.41156	-0.184208	-1.13619	0.643248	0.990545		8.62586	0.281943	1.21583	0.490089	0.991074		12.2233	0.608711	1.5249	0.0955947	0.248946		7.37416	0.0700655	1.04976	0.865961	0.993691
LOCUS_09080		complement(633982..634425)	8.67617	-0.111995	-1.08072	0.840379	0.9999		8.88259	0.023435	1.01638	0.966318	0.99997		8.74914	-0.0102786	-1.00715	0.986091	0.999997		10.3998	0.0406634	1.02859	0.917778	0.972097		10.1543	0.116726	1.08427	0.767594	0.990545		10.4533	0.12103	1.08751	0.771534	0.991074		11.6213	0.101073	1.07257	0.785903	0.883669		8.67617	-0.23305	-1.17532	0.581439	0.960549
[truncated: 6,763 more rows]

## Sheet: Table S6
Table S6. Primers used in this study.
[truncated: 148 more rows]
