# Supplementary material for: Colistin-resistant bacteria poses few risks under physiological conditions
Source: Research Square preprint supplement (doi:10.21203/rs.3.rs-2997601/v1), 2023-06-22
Supplement: Supplementary file 1 [file c77f263db15ff3e52a372197.pdf]

## **Extended Data**

# **Colistin-resistant bacteria poses few risks under physiological conditions**

Toyotaka Sato, Soh Yamamoto, Masaru Usui, Noriko Ogasawara,

Wataru Hayashi, Masato Suzuki, Noriyuki Nagano,

Chie Nakajima, Yasuhiko Suzuki, Motohiro Horiuchi,

Satoshi Takahashi, Shin-ichi Yokota, Yutaka Tamura

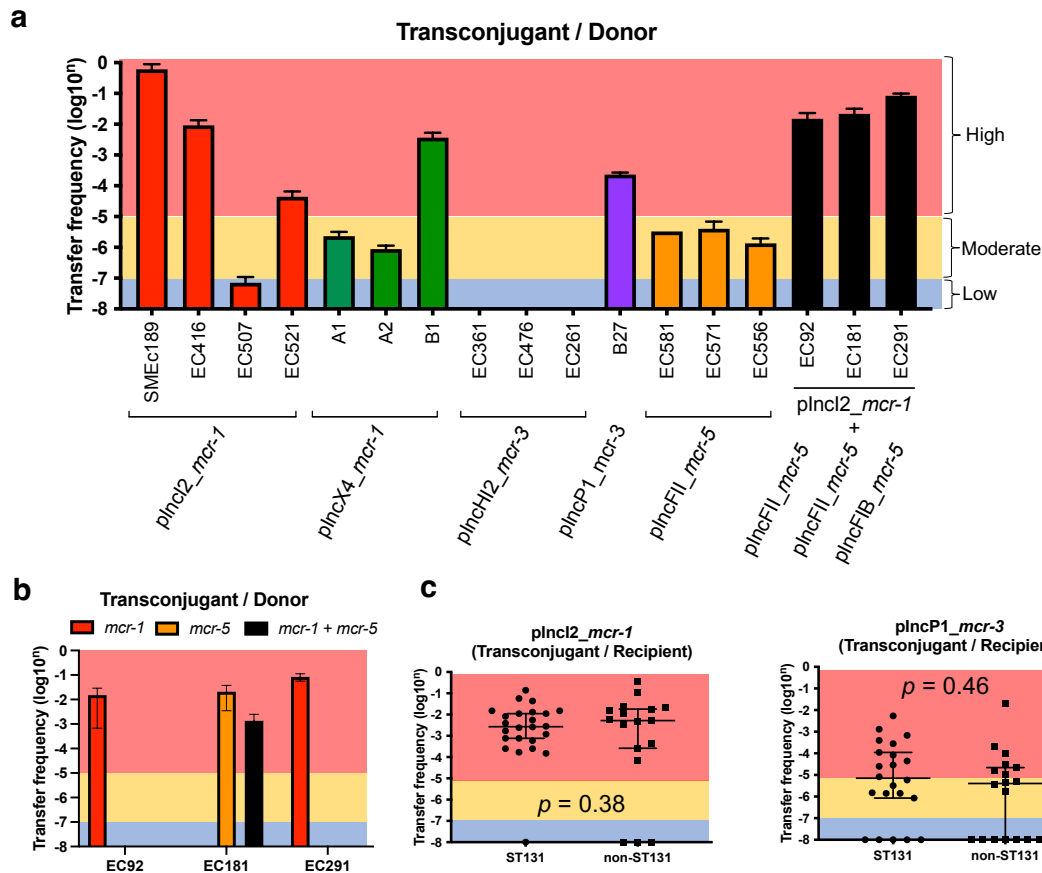

**Extended Data Fig. 1 | Transfer and recipient abilities of plasmid-mediated colistin resistance determinants in *E. coli* ST131.** (a) Transfer frequencies of *mcr-1*-, *mcr-3*-, and *mcr-5*-harbouring plasmids from various *E. coli* donors to *E. coli* ST131. *plncI2\_mcr-1*, *plncX4\_mcr-1*, *plncHI2\_mcr-3*, *plncP1\_mcr-3*, and *plncFII\_mcr-5*-harbouring *E. coli* donors and the recipient *E. coli* ST131 strain [colistin-susceptible, with a colistin minimum inhibitory concentration (MIC) of 0.5 mg/L], SME98, were used. Three donors (EC92, EC181, and EC291) possessed multiple *mcr* plasmids. The plasmid *plncI2\_mcr-1*, which was present in three donors (*E. coli* SMEc189, EC416, and EC521), exhibited a high transfer frequency ( $> 1 \times 10^{-5}$ , meaning more than 1 of in  $10^5$  donor clones transferred the *mcr*-harbouring plasmid to the recipient). High transfer frequencies were also observed for *plncX4\_mcr-1* and from *plncP1\_mcr-3* in one donor each (B1 and B27, respectively). Frequent loss of *plncX4\_mcr-1* from SME98 after the transfer was observed during subcultivation in the absence of colistin. None of the three donors carrying *plncHI2\_mcr-3* transferred *mcr-3*. The transfer frequencies of *plncFII\_mcr-5* were moderate, ranging from  $10^{-7}$  to  $10^{-5}$ . After obtaining the transconjugant, we identified the transfer frequency of each *mcr* and a recipient marker by PCR; at least 16 colonies grew on MHII agar containing 2 mg/L of colistin and 1 mg/L of ciprofloxacin. (b) Transfer frequencies of multiple *mcr*-harbouring plasmids from three donors (EC92, EC181, and EC291) into *E. coli* ST131. The transfer frequencies of plasmids in donors coharbouring *plncI2\_mcr-1* and *plncFII\_mcr-5* were dependent on the donor isolate; *E. coli* EC92 and EC291 transferred only *plncI2\_mcr-1*, whereas EC181 transferred both plasmids. (c) Comparison of the transfer frequency of *mcr*-harbouring plasmids between ST131 ( $n = 22$ ) and non-ST131 ( $n = 18$ ) fluoroquinolone-resistant *E. coli* recipient isolates. We used *E. coli* EC92 and B27 as donors of *plncI2\_mcr-1* and *plncP1\_mcr-3*, respectively, because of their high transfer abilities. Geometric means with geometric standard deviations are indicated.



**a**

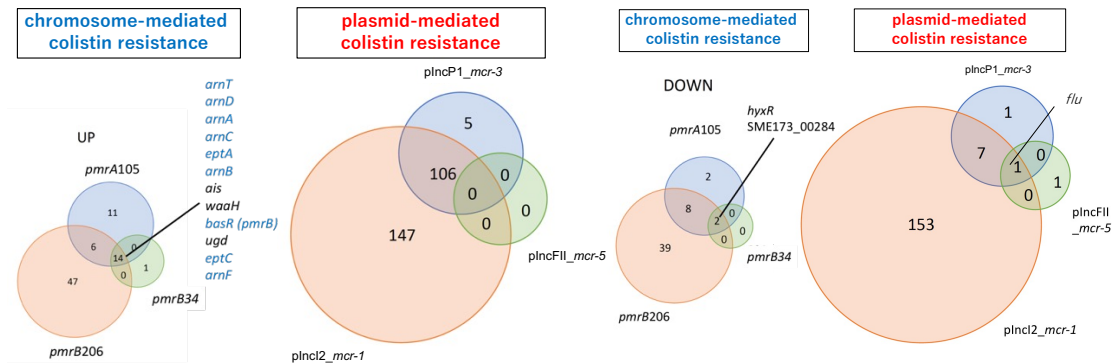

**b**

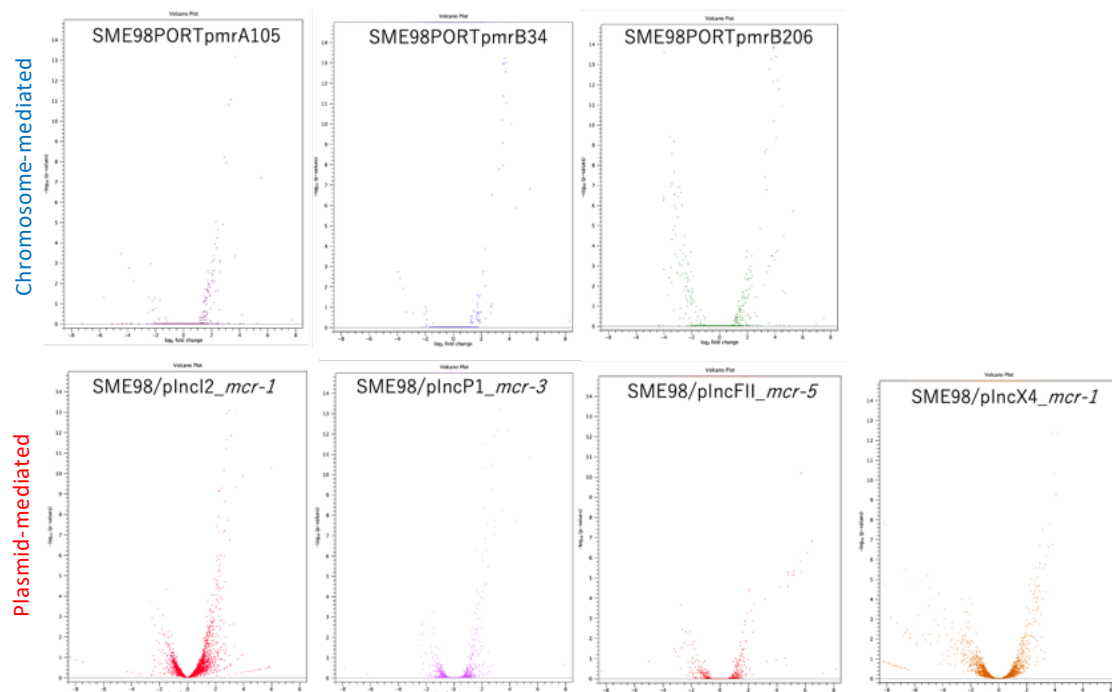

**Extended Data Fig. 3 | Transcriptome profiles after the acquisition of colistin resistance determinants in *E. coli* ST131.** (a) The number of up- (left) or down- (right) regulated genes in colistin-resistant SME98 mutants. The transcript levels of chromosome-mediated colistin-resistant SME98 mutants [SME98PORTpmrA105 (*pmrA*), SME98PORTpmrB34 (*pmrB34*), and SME98PORTpmrB206 (*pmrB206*)] and plasmid-mediated colistin-resistant SME98 mutants [SME98/plncI2\_mcr-1 (*plncI2\_mcr-1*), SME98/plncP1\_mcr-3 (*plncP1\_mcr-3*), and SME98/plncFII\_mcr-5 (*plncFII\_mcr-5*)] were compared with those of SME98 by RNA-Seq. The values indicate the number of genes whose expression changed significantly compared to that in SME98 (4-fold up- or downregulated vs. SME98,  $FDR_p < 0.05$ ). (b) Volcano plots of chromosome- and plasmid-mediated colistin resistance. The X-axis shows the fold changes of transcripts, and the Y-axis shows the p values of the changes (vs. SME98). The results of RNA-Seq analyses are shown as the average of duplicate biological samples (different lots of MHBII were used for each sample).

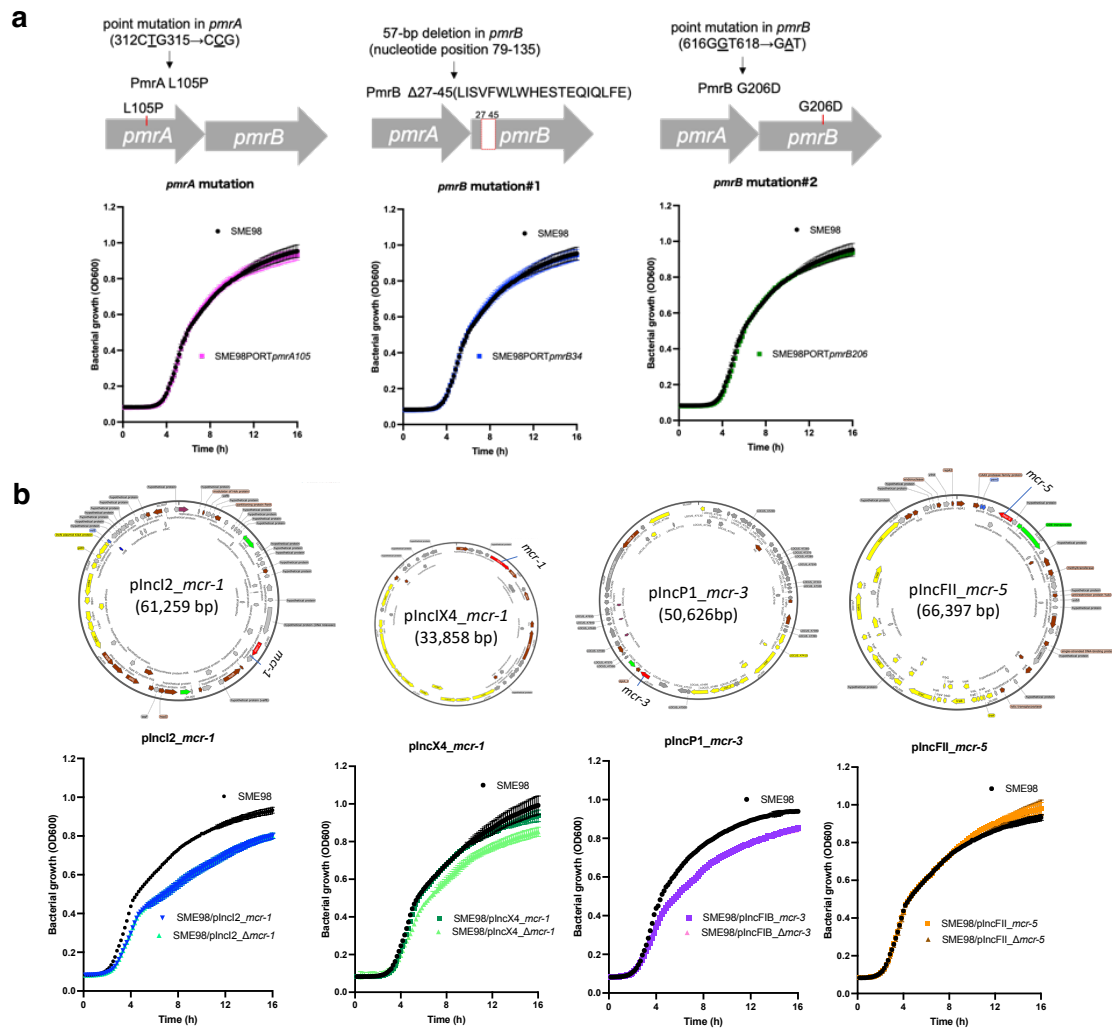

**Extended Data Fig. 4 | Bacterial growths of *E. coli* ST131 mutants after the acquisition of colistin resistance determinants.** *E. coli* SME98 was used as a parent ST131 strain. (a) Bacterial growth of chromosome-mediated colistin-resistant *E. coli* ST131 mutants. *pmrA* or *pmrB* mutations were introduced into SME98 (SME98PORTpmrA105, SME98PORTpmrB34, and SME98PORTpmrB206). These bacteria were cultured in MHBII at 140 rpm and 37°C for 16 h, and growth was monitored as turbidity (OD<sub>600</sub>)<sup>18</sup>. (b) Bacterial growth of plasmid-mediated colistin-resistant *E. coli* ST131 mutants. plncI2\_ *mcr*-1, plncX4\_ *mcr*-1, plncP1\_ *mcr*-3, and plncFII\_ *mcr*-5 were transferred from donors (EC92, B1, B27, and EC181, respectively) to SME98 by broth mating. The bacterial growth of these transconjugants (SME98/plncI2\_ *mcr*-1, SME98/plncX4\_ *mcr*-1, SME98/plncP1\_ *mcr*-3, and SME98/plncFII\_ *mcr*-5, respectively) and their *mcr* deletion mutants was monitored (OD<sub>600</sub>). Arrows in the plasmid maps show the gene encoding *mcr* (red), functional proteins (brown), transposons/integrans (green), transferred genes (yellow), and hypothetical proteins (grey).

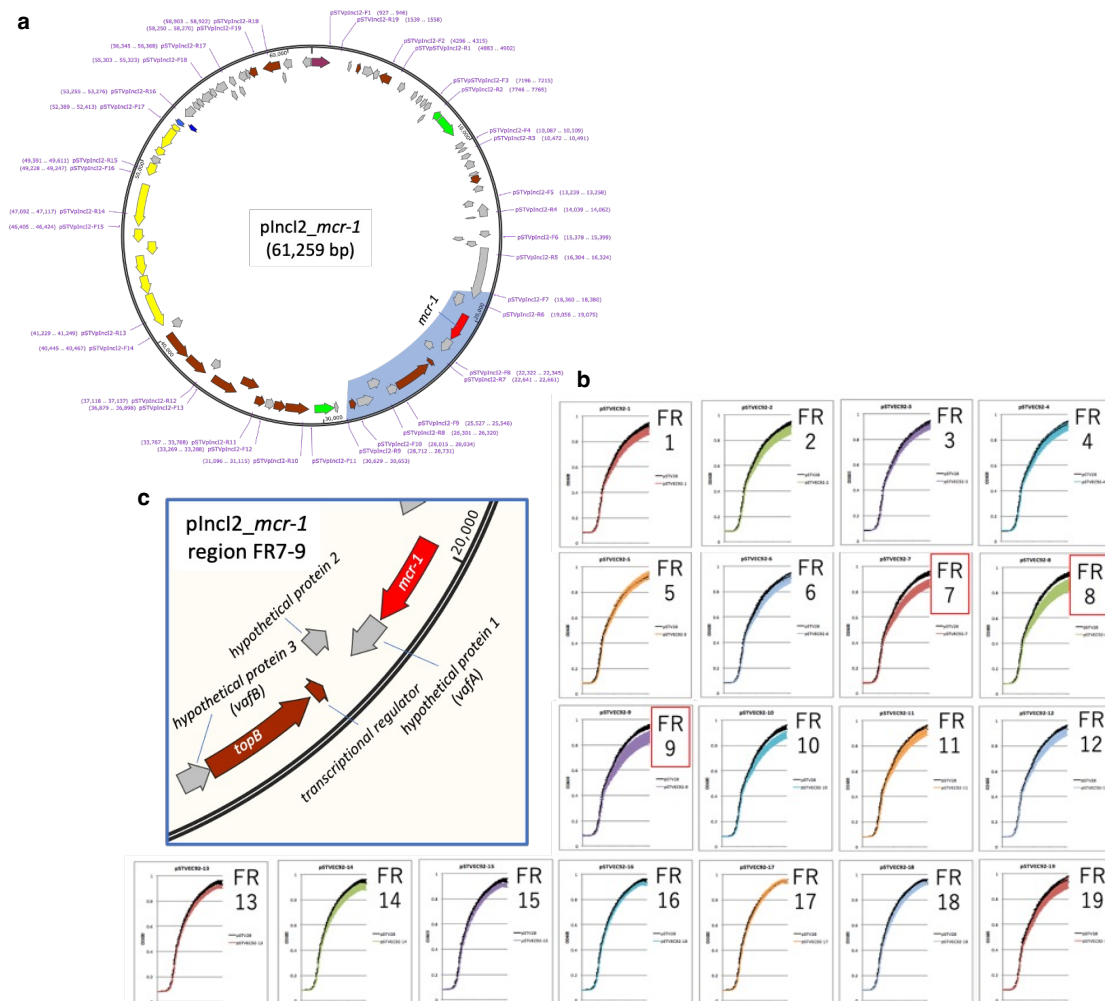

**Extended Data Fig. 5 | Identification of regions in the plncl2\_mcr-1 plasmid that affect the bacterial growth of ST131.** (a) Map of plncl2\_mcr-1 and primer pairs for cloning its 19 fragments. plncl2\_mcr-1 derived from *E. coli* EC92 was used. Arrows in the plasmid map show the genes encoding *mcr-1* (red), functional proteins (brown), transposons/integrans (green), transferred genes (yellow), and hypothetical proteins (grey). We divided plncl2\_mcr-1 into an average of 19 3.2 kb DNA fragments [each fragment contained the whole sequence of the coding region with the putative promoter region (upstream 500 bp)]. We then cloned each fragment into the pSTV28 vector and introduced the constructs into SME98, and bacterial growth was monitored. Purple shows the primer annealing regions for amplification and cloning of the 19 DNA fragments into pSTV28 (primer sequences are listed in Table S6). The blue highlighting shows the regions from FR7 to FR9. (b) Influence of the 19 DNA fragments derived from plncl2\_mcr-1 on the bacterial growth of *E. coli* ST131. The 19 DNA fragments from plncl2\_mcr-1 were cloned into pSTV28 and electroporated into the SME98 strain. The bacterial growth of SME98 (black) and fragment-containing mutants (coloured) was monitored at OD<sub>600</sub>. (c) Genes present in the regions from FR7 to FR9 of plncl2\_mcr-1.





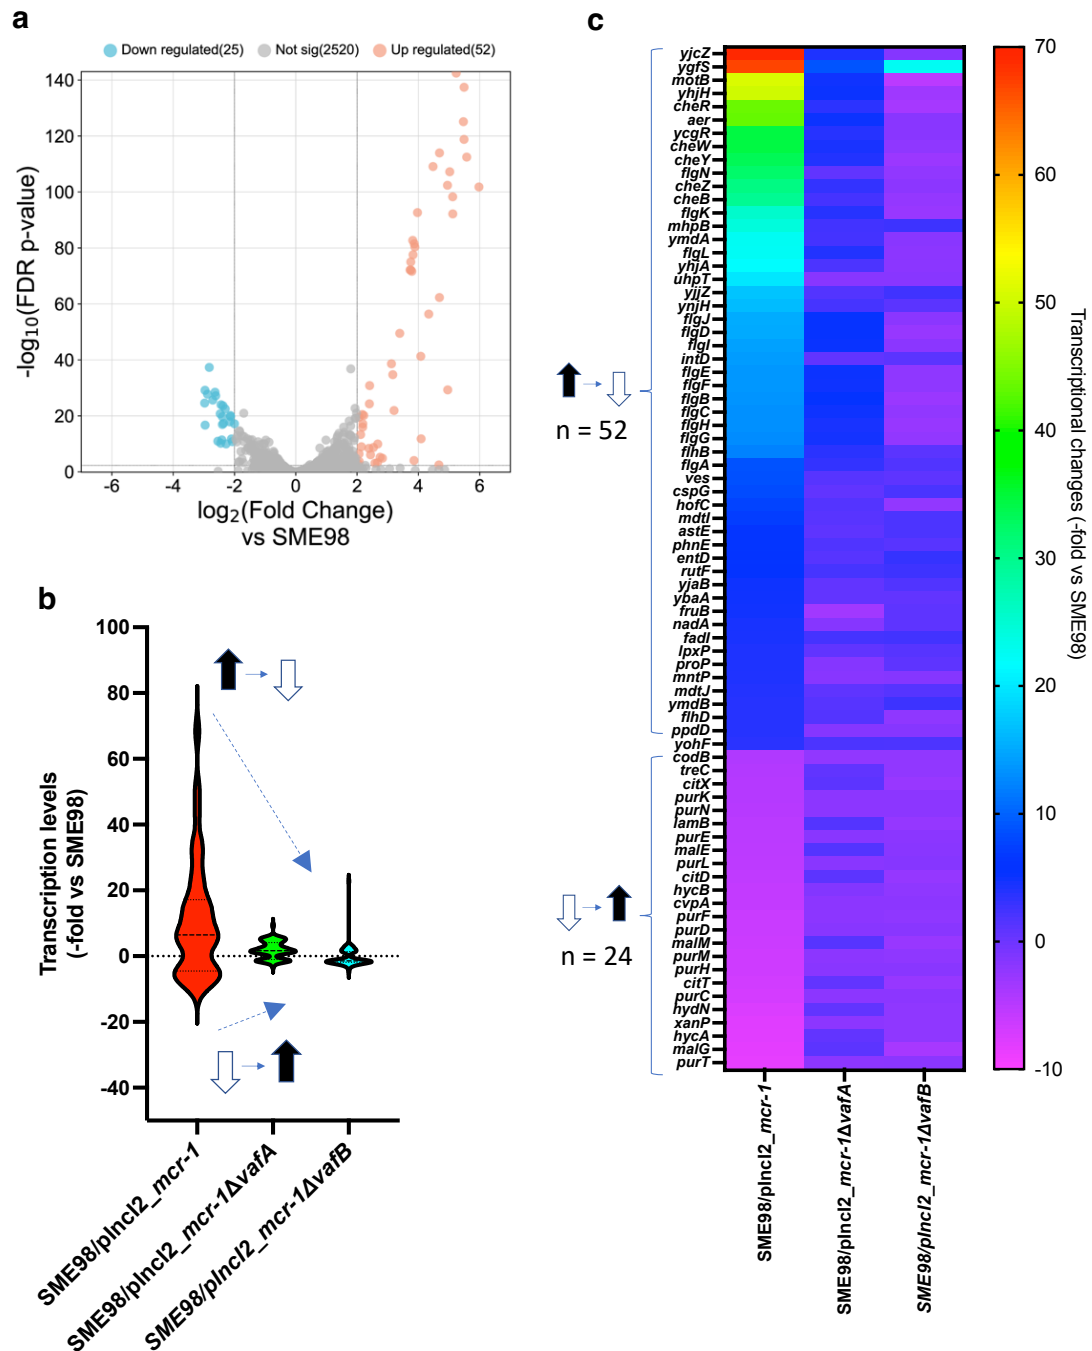

**Extended Data Fig. 7 | Screening for up- or down-regulated genes after deletion of *vafA* and *vafB* in *E. coli*.** (a) Significantly up- or downregulated genes after acquisition of *plncI2\_mcr-1* in *E. coli* ST131 SME98. The 486 significantly up- or downregulated genes (vs. SME98; and  $FDRp < 0.005$ ) were selected from 2596 common genes between the *E. coli* ST131 and BL21 strains (Table S3). The 77 genes that exhibited more than 4-fold up- or downregulation compared to SME98 are shown as orange or blue dots, respectively. (b and c) Screening for *vafA*- or *vafB*-regulated genes in the *E. coli* genome. Among the 77 genes with altered transcription levels after the acquisition of *plncI2\_mcr-1*, we further selected the genes that had attenuated transcription levels after deletion of *vafA* and/or *vafB*. (b) Distribution of transcription levels for the 77 genes. (c) Heatmap of the transcription levels of individual genes.





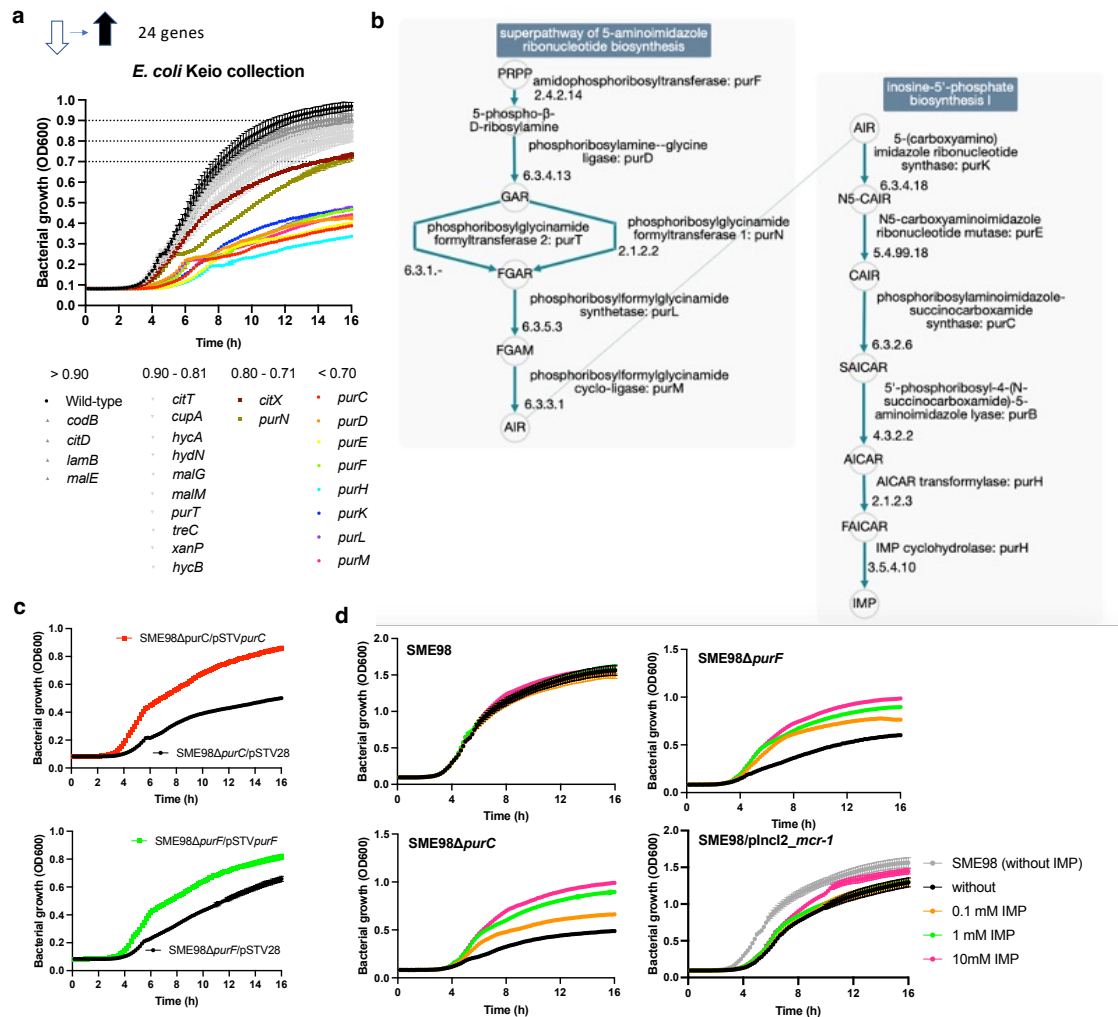

**Extended Data Fig. 9 | Screening for growth inhibitory factors among the genes downregulated after the acquisition of *plncl2\_mcr-1*.** (a) Bacterial growth after gene deletion of 24 downregulated genes by using the *E. coli* Keio collection. The influence of the 24 genes downregulated by the acquisition of *plncl2\_mcr-1* (and attenuated by the deletion of *vafA* and/or *vafB*) on bacterial growth (OD<sub>600</sub>) was monitored in *E. coli* BW25113. The values obtained after 16 h of cultivation were classified as no significant change (> 0.90, dark grey), slight reduction (0.90-0.81, light grey), moderate reduction (0.80-0.71, coloured), or substantial reduction (<0.70, coloured) in growth. (b) Pathway analysis of *pur* genes by BioCyc. Left shows the super pathway of 5-aminoimidazole ribonucleotide biosynthesis, and right shows the inosine-5'-phosphate biosynthesis I pathway that is involved in nucleotide biosynthesis (purines). PRPP, 5-phosphoribosylpyrophosphate; GAR, glycineamide ribonucleotide; FGAR, N-formylglycinamide ribonucleotide; FGAM, N-formylglycinamide ribonucleotide; AIR, aminoimidazole ribonucleotide; N<sup>5</sup>-CAIR, N<sup>5</sup>-carboxyaminoimidazole ribonucleotide; CAIR, carboxyaminoimidazole ribonucleotide; SAICAR, N-succinocarboxamide-5-aminoimidazole ribonucleotide; AICAR, 5-aminoimidazole-4-carboxamide ribonucleotide; FAICAR, 5-formamido-4-imidazolecarboxamide ribonucleotide; IMP, inosine-5'-monophosphate. (c) Bacterial growth of *purC*- and *purF*-deletion mutants and their complementation mutants. *purC* or *purF* was cloned into pSTV28 with the -500 bp upstream region that includes the putative native promoter sequences. These *purC*- or *purF*- expression vectors were electroporated into *purC*- or *purF*-deletion SME98 mutants, respectively, and their bacterial growth was monitored. (d) Influence of inosine-5'-monophosphate on bacterial growth. We monitored the bacterial growth of SME98, the *purC*- and *purF*-deletion mutants, and SME98/*plncl2\_mcr-1* at 140 rpm and 37°C for 16 h in the presence of 0.1, 1, or 10 mM of inosine-5'-monophosphate (IMP).

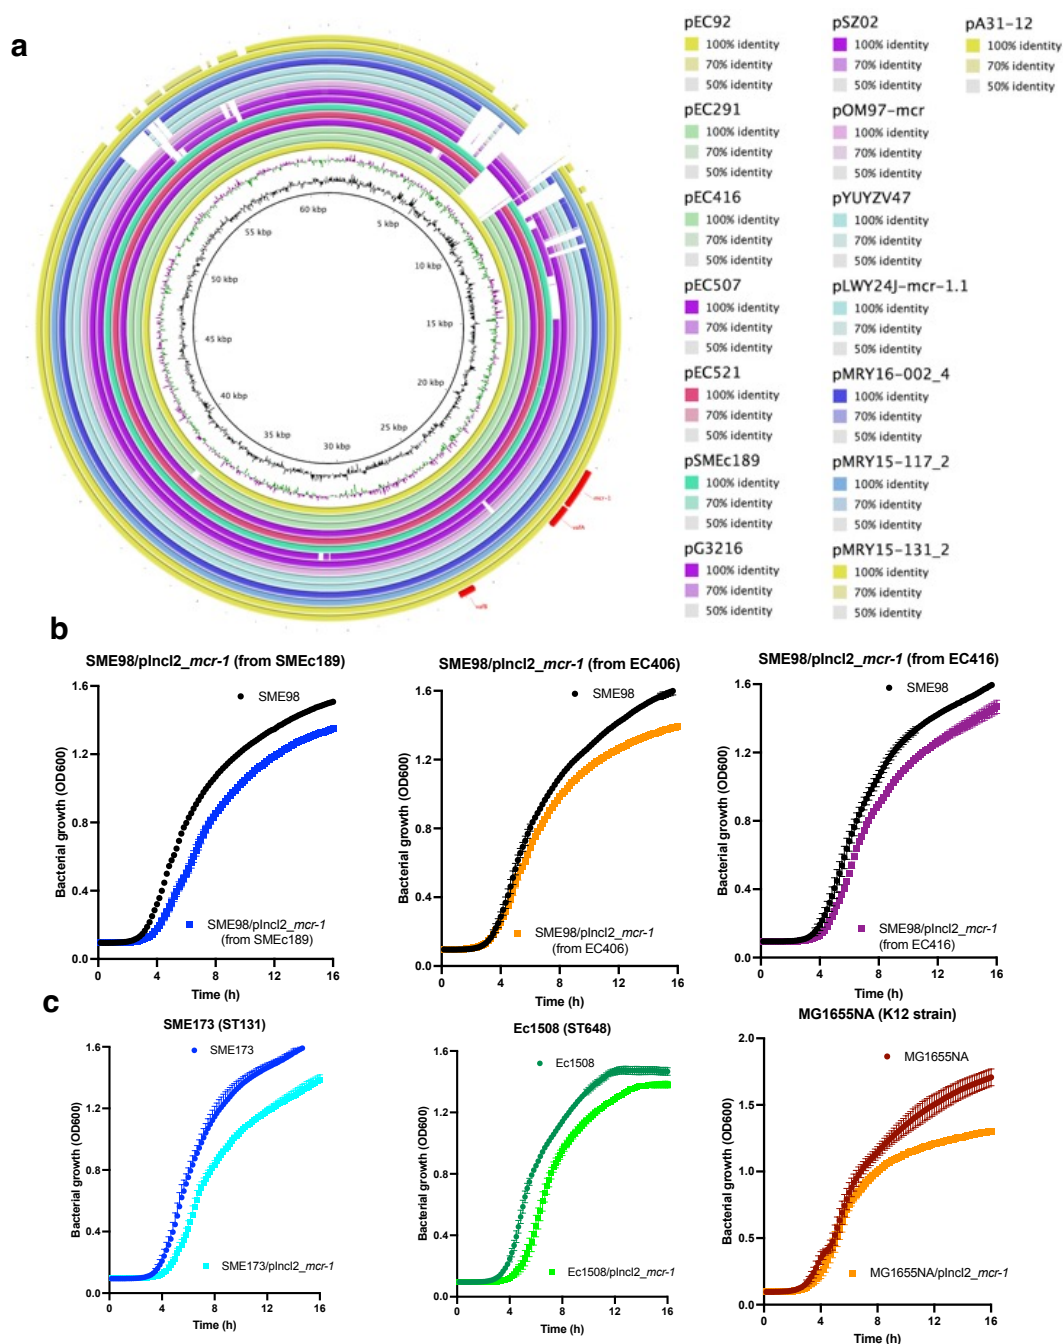

**Extended Data Fig. 10 | Comparison of the influence of *plncl2\_mcr-1* on bacterial growth in *E. coli* isolates.** (a) The nucleotide sequences of 14 representative *plncl2\_mcr-1* plasmids were obtained from NCBI and compared by BLAST RING. *plncl2\_mcr-1* from *E. coli* EC92 (pEC92) was used as a reference. Red arrows show *mcr-1*, *vafA*, and *vafB*. The presence of *vafA* and *vafB* in *plncl2\_mcr-1* plasmids is also listed in Table S4. (b) Influence of different *plncl2\_mcr-1* plasmids on the bacterial growth of ST131. Different *plncl2\_mcr-1* plasmids were transferred into the recipient strain (SME98) from donors (SMEc189, Ec406, and Ec416) via broth mating, and bacterial growth (OD<sub>600</sub>) was monitored for 16 h at 37°C. (c) Influence of *plncl2\_mcr-1* on the growth of several *E. coli* clones. *plncl2\_mcr-1* from *E. coli* EC92 was transferred into three *E. coli* recipients of different lineages (SME173, Ec1508, and MG1655NA) via broth mating, and bacterial growth (OD<sub>600</sub>) was monitored. MG1655NA is a nalidixic acid-resistant *E. coli* MG1655 mutant (the nalidixic acid MIC was >128 mg/L).
